# Supplementary material for: Candidate Luminal B Breast Cancer Genes Identified by Genome, Gene Expression and DNA Methylation Profiling
Source: PLoS One. 2014 Jan 9;9(1):e81843. doi: 10.1371/journal.pone.0081843 (PMC3886975; doi:10.1371/journal.pone.0081843)
Supplement: Table S4 — A: Histoclinical characteristics of the 117 samples (109 BC+8 NB) distributed in the three clusters defined by the unsupervised DNA methylation analysis. B: Supervised DNA methylation analysis comparing ER+ and ER- BCs. C: DNA methylation data analysis – 4,545 gene promoters exhibited a DNA methylation level different in at least one molecular subtype. D: 459 genes exhibited mRNA expression deregulation in relation with DNA methylation level. E: Genes exhibiting a mRNA expression deregulation in relation with DNA methylation level in the various molecular subtypes. A comparison with TCGA data [28] was done. F: Molecular subtype specific candidates presenting mRNA expression deregulation in relation with CNA and with DNA promoter methylation aberrations. (XLSX) [file pone.0081843.s020.xlsx]

## Sheet: Table S4A
Table S4A: Histoclinical characteristics of the 117 samples (109 BC + 8 NB) distributed in the three clusters defined by the unsepervised DNA methylation analysis
Characteristics (N)	Cluster I	Cluster IIa	Cluster IIb	p
	N=36 (31%)	N=34 (29%)	N=47 (40%)
Normal Breast (8)	8 (100%)	0 (0%)	0 (0%)
Median age (109)	57,5(32-79)	50,5(29-75)	57(24-82)	0.0865732
PT (104)				0.54023
pT1	6 (24%)	12 (36%)	10 (22%)
pT2	14 (56%)	18 (55%)	28 (61%)
pT3	5 (20%)	3 (9%)	8 (17%)
PN (106)				0.067782
negative	15 (60%)	14 (41%)	15 (32%)
positive	10 (40%)	20 (59%)	32 (68%)
SBR Grade (108)				0.00049975
1	4 (15%)	8 (24%)	8 (17%)
2	1 (4%)	15 (44%)	22 (47%)
3	22 (81%)	11 (32%)	17 (36%)
IHC ER status (108)				5.60747e-07
negative	20 (74%)	6 (18%)	8 (17%)
positive	7 (26%)	28 (82%)	39 (83%)
IHC PR status (108)				2.261e-07
negative	23 (85%)	7 (21%)	14 (30%)
positive	4 (15%)	27 (79%)	33 (70%)
IHC ERBB2 status (102)				0.36325
negative	22 (85%)	26 (84%)	42 (93%)
positive	4 (15%)	5 (16%)	3 (7%)
IHC KI67 status (101)				0.197161
negative	4 (17%)	13 (41%)	15 (33%)
positive	19 (83%)	19 (59%)	31 (67%)
IHC TP53 status (88)				0.00118061
negative	9 (43%)	15 (60%)	36 (86%)
positive	12 (57%)	10 (40%)	6 (14%)
Molecular subtype (109)				0.00049975
Basal	17 (61%)	3 (9%)	3 (6%)
ERBB2	4 (14%)	6 (18%)	2 (4%)
LuminalA	4 (14%)	17 (50%)	20 (43%)
LuminalB	1 (4%)	7 (21%)	18 (38%)
Normal	2 (7%)	1 (3%)	4 (9%)
5-year MFS (109)	0.69	0.79	0.68	0.679
5-year OS (109)	0.76	0.86	0.68	0.265

## Sheet: Table S4B
Table S4B: Supervised DNA methylation analysis comparing ER+ and ER- BCs*
Symbol	Cytoband	Q-value (ttest ER- vs ER+)	Stats	Status ER- Vs ER+	Q-value (ttest ER vs NB)	Stats	Status ER vs SN
ELP2	18q12.2	8.11347e-13	10.0739	hyper	0.00102221	-4.78424	hypo
GREB1	2p25.1	1.00467e-08	8.5271	hyper	3.52054e-07	-7.71285	hypo		*These data are in agreement with those reported on Illumina® platform (20-21,23-24, Sunami et al, 2008**, Jovanovic et al, 2010**)
IRS1	2q36.3	1.00467e-08	8.77202	hyper	0.00176586	-4.35234	hypo
HSD17B7	1q23.3	2.31324e-08	8.27278	hyper	0.00222544	-4.39199	hypo		**: see supplementary informations_references
MLXIP	12q24.31	2.54326e-08	-7.7615	hypo	4.53354e-05	4.75575	hyper
LHX1	17q12	2.54326e-08	-8.02956	hypo	0.000184767	5.67533	hyper
C19orf33	19q13.2	2.54326e-08	7.96607	hyper	0.173682	-1.62802	hypo
KDR	4q12	2.58015e-08	-8.1136	hypo	0.0414828	2.79321	hyper
MOBKL2B	9p21.2	2.58015e-08	-7.82554	hypo	0.000121857	7.15694	hyper
YBX1	1p34.2	3.35001e-08	-7.95861	hypo	0.00019108	5.43021	hyper
OR11G2	14q11.2	3.4838e-08	7.82154	hyper	0.000204733	-5.46244	hypo
ESR1	6q25.1	4.09566e-08	7.57959	hyper	2.47365e-07	-6.58087	hypo
MICALL2	7p22.3	4.09566e-08	8.08975	hyper	0.426433	-0.973458	hypo
LRRK1	15q26.3	1.00995e-07	-7.4433	hypo	0.598733	-0.660572	hypo
AGR3	7p21.1	1.00995e-07	7.49024	hyper	8.88765e-08	-7.7366	hypo
ZFX	23p22.11	1.00995e-07	7.37408	hyper	0.585778	0.679202	hyper
CELSR1	22q13.31	1.08173e-07	7.49585	hyper	0.290475	-1.29257	hypo
CHST11	12q23.3	1.15295e-07	-8.14085	hypo	0.00457754	3.78719	hyper
SOX11	2p25.2	1.93526e-07	-7.87875	hypo	0.0188877	2.92699	hyper
STXBP6	14q12	1.93526e-07	-7.63484	hypo	4.41102e-11	12.1577	hyper
CD38	4p15.32	2.02919e-07	-7.30038	hypo	1.74946e-13	11.9217	hyper
GPR77	19q13.32	2.02919e-07	7.2044	hyper	0.00117013	-3.79603	hypo
MFSD2	1p34.2	2.15787e-07	-7.65477	hypo	0.284708	1.31278	hyper
MAP4K4	2q11.2	2.15787e-07	-7.75636	hypo	7.14756e-17	17.8064	hyper
VSNL1	2p24.2	2.3563e-07	-7.34797	hypo	1.98818e-06	6.76621	hyper
FABP7	6q22.31	2.38154e-07	-7.66317	hypo	0.00212931	4.09566	hyper
BZW1	2q33.1	2.70854e-07	7.4126	hyper	0.694404	0.503527	hyper
FAM84A	2p24.3	2.78334e-07	-7.02909	hypo	0.0326746	2.79823	hyper
ENO1	1p36.23	2.96714e-07	-7.29909	hypo	0.228533	-1.42466	hypo
RPS27A	2p16.1	3.13265e-07	-7.25907	hypo	0.00678398	-3.62114	hypo
ARL4C	2q37.1	3.4731e-07	-7.38656	hypo	1.89317e-07	10.1174	hyper
FGF9	13q12.11	3.59569e-07	-7.35845	hypo	0.000771826	4.91354	hyper
SFT2D2	1q24.2	4.33445e-07	-8.10683	hypo	5.64666e-08	9.94686	hyper
LIMCH1	4p13	4.33445e-07	-6.9101	hypo	2.59054e-08	9.74653	hyper
PDZK1	1q21.1	4.33445e-07	6.85078	hyper	1.15346e-06	-7.00328	hypo
SLC39A6	18q12.2	4.9783e-07	6.86595	hyper	4.0204e-06	-7.39059	hypo
F2R	5q13.3	5.55024e-07	-7.26362	hypo	0.0402944	2.55445	hyper
G3BP1	5q33.1	5.55024e-07	-7.20664	hypo	3.81925e-08	10.7123	hyper
DEXI	16p13.13	5.55024e-07	-6.86271	hypo	4.35947e-06	7.39976	hyper
DNALI1	1p34.3	5.55024e-07	7.16588	hyper	0.377115	1.05158	hyper
C6orf206	6p21.1	5.55024e-07	6.90932	hyper	0.018641	3.16819	hyper
SLC43A3	11q12.1	6.1385e-07	-6.86211	hypo	1.71625e-06	7.45039	hyper
JPH2	20q13.12	6.1385e-07	-7.10339	hypo	0.00307982	3.87893	hyper
EDAR	2q13	6.1385e-07	6.8497	hyper	0.000774799	-4.65323	hypo
KRT18	12q13.13	7.15972e-07	6.96522	hyper	0.00209042	-4.97489	hypo
SMARCD2	17q23.3	9.72209e-07	-6.94855	hypo	0.101966	-2.05148	hypo
PRR11	17q22	9.90022e-07	-7.55915	hypo	0.00697721	-3.98236	hypo
KLHL14	18q12.1	1.03834e-06	-7.13654	hypo	0.257216	-1.38433	hypo
NIPSNAP3B	9q31.1	1.63781e-06	6.79475	hyper	0.149117	1.69877	hyper
C5AR1	19q13.32	1.83227e-06	-7.06231	hypo	0.0119844	-3.32066	hypo
NECAB3	20q11.22	1.83888e-06	6.84624	hyper	0.396317	-1.03666	hypo
SLC2A10	20q13.12	1.83888e-06	6.63146	hyper	1.54138e-06	-5.83611	hypo
MAML2	11q21	1.91151e-06	-6.90028	hypo	2.00966e-09	12.0169	hyper
CLIC6	21q22.12	1.91151e-06	6.93563	hyper	0.199659	-1.5963	hypo
LBR	1q42.12	1.95627e-06	-6.91356	hypo	0.197866	1.61029	hyper
HAS2	8q24.13	1.95627e-06	-6.67539	hypo	1.46213e-06	6.53477	hyper
SORBS3	8p21.3	1.95627e-06	6.81148	hyper	0.0802676	2.06188	hyper
HERC5	4q22.1	2.10196e-06	-6.87498	hypo	3.02849e-06	7.24888	hyper
DCI	16p13.3	2.15428e-06	6.65474	hyper	0.167434	1.67194	hyper
RGS20	8q11.23	2.23378e-06	-6.59422	hypo	0.00730136	3.94201	hyper
BCL11B	14q32.2	2.36841e-06	-6.73521	hypo	0.680121	-0.516985	hypo
TBC1D9	4q31.21	2.42029e-06	6.57743	hyper	0.929254	0.117612	hyper
MGC21874	4p16.1	2.51816e-06	6.51094	hyper	0.0126258	-3.15182	hypo
PCCA	13q32.3	2.53138e-06	6.64671	hyper	0.379999	1.08796	hyper
MAN1C1	1p36.11	2.97465e-06	-6.44302	hypo	0.0012985	5.11614	hyper
VASH2	1q32.3	2.97465e-06	-6.36385	hypo	1.35075e-07	10.8173	hyper
LRRC8C	1p22.2	3.57972e-06	-6.79458	hypo	4.61926e-07	8.67586	hyper
EGR2	10q21.2	3.57972e-06	-6.37887	hypo	2.35578e-05	6.84365	hyper
GJC1	17q21.31	3.57972e-06	-6.43732	hypo	0.000360399	5.84196	hyper
CORIN	4p12	3.64583e-06	-6.5266	hypo	3.66585e-06	8.40486	hyper
VCAN	5q14.3	3.71575e-06	-6.56239	hypo	4.19667e-08	8.44474	hyper
CHST4	16q22.3	3.71575e-06	-6.47424	hypo	4.92104e-10	12.3071	hyper
SCNN1A	12p13.31	3.7162e-06	6.70433	hyper	0.760082	0.393128	hyper
LRP4	11p11.2	3.93601e-06	-6.55925	hypo	6.73247e-06	6.6126	hyper
DUSP5	10q25.2	4.18328e-06	6.71592	hyper	0.482453	0.848309	hyper
GPR81	12q24.31	4.2013e-06	6.3322	hyper	0.000208927	-4.69669	hypo
LRFN3	19q13.12	4.26731e-06	6.30107	hyper	0.000115459	5.72337	hyper
PRICKLE1	12q12	4.5931e-06	-6.21398	hypo	0.00451751	3.40675	hyper
KCTD3	1q41	4.5931e-06	6.43385	hyper	0.00808571	-3.00131	hypo
KIF2A	5q12.1	5.08393e-06	-6.37373	hypo	0.462622	-0.897707	hypo
C4orf18	4q32.1	5.22272e-06	6.73533	hyper	0.674095	0.531529	hyper
HIST3H2BB	1q42.13	5.23624e-06	-6.17918	hypo	0.000462759	4.14094	hyper
C20orf103	20p12.2	5.27637e-06	-6.46088	hypo	1.03327e-06	7.46138	hyper
CCDC38	12q23.1	5.27637e-06	6.29149	hyper	0.489724	0.844444	hyper
DDAH2	6p21.33	5.36228e-06	6.38878	hyper	0.0261827	-2.93892	hypo
E4F1	16p13.3	5.58702e-06	6.40067	hyper	0.00155584	-4.62073	hypo
ZNF462	9q31.2	5.76437e-06	-6.22639	hypo	1.11988e-06	7.91125	hyper
OTUD7B	1q21.2	5.76437e-06	6.22077	hyper	0.248797	-1.44469	hypo
SERPINA3	14q32.13	5.76437e-06	6.10438	hyper	0.0039029	-3.58064	hypo
ABCC3	17q21.33	6.36944e-06	-6.56258	hypo	0.00616786	-3.45924	hypo
TMEM22	3q22.3	6.42492e-06	-6.19301	hypo	2.27502e-15	13.1486	hyper
NRP2	2q33.3	6.45069e-06	-6.34377	hypo	7.39609e-06	5.82961	hyper
FLJ45079	17q25.3	6.68362e-06	-6.28712	hypo	0.293636	1.27136	hyper
FGF19	11q13.3	6.96821e-06	-6.57496	hypo	9.23158e-06	5.75969	hyper
TRAK1	3p22.1	6.96821e-06	6.24998	hyper	0.511118	-0.826068	hypo
ANP32B	9q22.33	7.16839e-06	-6.76931	hypo	3.30064e-05	7.21531	hyper
HOXA3	7p15.2	7.43539e-06	6.18006	hyper	1.96736e-16	14.8473	hyper
SIAH2	3q25.1	8.20838e-06	6.25175	hyper	0.0425211	-2.53268	hypo
RXRA	9q34.2	8.20838e-06	6.33277	hyper	0.452646	-0.924703	hypo
MAP1S	19p13.11	8.47441e-06	-6.34092	hypo	0.0386343	2.74234	hyper
AMAC1L3	17p13.1	8.47441e-06	6.1975	hyper	0.00527828	3.5405	hyper
IGF2BP3	7p15.3	8.75282e-06	-6.54495	hypo	0.83622	0.271385	hyper
ICAM3	19p13.2	8.75282e-06	6.08874	hyper	0.207791	1.57381	hyper
COX6B2	19q13.42	8.94534e-06	-5.93997	hypo	0.0187288	3.1271	hyper
ZFP161	18p11.31	8.94534e-06	6.31365	hyper	0.0626853	-2.34673	hypo
TFF1	21q22.3	8.94534e-06	6.04662	hyper	1.51894e-12	-13.6541	hypo
FRS2	12q15	9.07384e-06	6.16052	hyper	0.652415	0.566718	hyper
CRLF3	17q11.2	9.17078e-06	-6.26635	hypo	0.0526835	2.3534	hyper
CTSC	11q14.2	1.06485e-05	-6.13803	hypo	0.237227	-1.47692	hypo
C5orf39	5p12	1.0679e-05	-6.26117	hypo	0.292855	1.27312	hyper
USF2	19q13.12	1.08389e-05	6.05097	hyper	0.00392894	-4.17775	hypo
ODC1	2p25.1	1.10802e-05	-6.47386	hypo	0.124943	1.91255	hyper
SSH3	11q13.1	1.10802e-05	6.00676	hyper	0.000475871	-5.08812	hypo
RABEP1	17p13.2	1.10802e-05	5.92161	hyper	0.00509137	-3.64485	hypo
PLAU	10q22.2	1.13356e-05	-6.11622	hypo	5.77746e-06	6.96554	hyper
MYO1F	19p13.2	1.13356e-05	-6.06338	hypo	7.94445e-08	-7.41631	hypo
USP3	15q22.31	1.13382e-05	6.22056	hyper	0.0122003	-3.17974	hypo
TRIB2	2p25.1	1.15476e-05	-5.9135	hypo	0.562252	-0.723774	hypo
CD22	19q13.12	1.15476e-05	-6.40603	hypo	0.276635	-1.34481	hypo
SLC43A2	17p13.3	1.1817e-05	-5.90564	hypo	7.20037e-05	6.11584	hyper
CA12	15q22.2	1.24228e-05	6.10268	hyper	7.92736e-05	-5.55674	hypo
PTPN14	1q41	1.26369e-05	-6.32841	hypo	2.33182e-06	7.42036	hyper
KCNJ5	11q24.3	1.26369e-05	-6.16228	hypo	0.955367	0.0745401	hyper
LMX1B	9q33.3	1.26889e-05	6.03051	hyper	1.55188e-05	-7.75211	hypo
LPIN1	2p25.1	1.2798e-05	-6.3749	hypo	0.000498342	5.26798	hyper
TMCC1	3q21.3	1.2798e-05	6.16848	hyper	3.97364e-05	5.2802	hyper
IGHMBP2	11q13.2	1.32739e-05	5.89394	hyper	3.50506e-08	-6.61337	hypo
CNKSR1	1p36.11	1.32924e-05	5.92393	hyper	0.561297	-0.733851	hypo
TBX19	1q24.2	1.32924e-05	5.96483	hyper	7.6897e-06	-7.73501	hypo
SLC44A1	9q31.1	1.47332e-05	6.05437	hyper	0.00163964	5.16569	hyper
ID2	2p25.1	1.49458e-05	-6.04779	hypo	0.934315	0.109402	hyper
DBNDD2	20q13.12	1.59689e-05	5.77906	hyper	0.238505	-1.44466	hypo
PPM1F	22q11.22	1.67555e-05	-6.28088	hypo	1.8476e-05	8.02146	hyper
MKL2	16p13.12	1.67555e-05	5.92006	hyper	0.0286621	-2.64615	hypo
EIF2C4	1p34.3	1.67798e-05	5.93168	hyper	0.311861	1.20566	hyper
EVI1	3q26.2	1.67798e-05	-5.95812	hypo	0.0500899	2.29385	hyper
FLJ14213	11p13	1.67798e-05	-5.89949	hypo	0.00635201	3.40134	hyper
MUC1	1q22	1.67798e-05	6.15531	hyper	2.2101e-09	-8.30825	hypo
SEPT8	5q31.1	1.67798e-05	5.87233	hyper	0.0135847	3.18431	hyper
MYO1C	17p13.3	1.67798e-05	5.89201	hyper	0.0981831	2.12723	hyper
NFE2L3	7p15.2	1.67849e-05	-6.23647	hypo	0.433918	0.95677	hyper
SPOCK2	10q22.1	1.68072e-05	-6.09057	hypo	0.0901663	-2.18086	hypo
HIST1H2AG	6p22.1	1.68186e-05	-5.79434	hypo	0.0147136	-2.87747	hypo
DLX1	2q31.1	1.78323e-05	-5.8532	hypo	0.0890386	2.13422	hyper
ADAMTS1	21q21.3	1.78323e-05	-5.74458	hypo	0.00109039	4.91211	hyper
LOC196993	15q23	1.786e-05	5.96635	hyper	2.33847e-05	-8.61047	hypo
DHX9	1q25.3	1.83493e-05	-5.99622	hypo	0.119829	1.92753	hyper
AMAC1	17q12	1.86017e-05	5.79482	hyper	0.162966	-1.76024	hypo
ID1	20q11.21	1.91812e-05	-5.95718	hypo	0.799416	-0.333617	hypo
UNC45B	17q12	1.92473e-05	5.63182	hyper	5.28628e-06	-6.3429	hypo
USP49	6p21.1	1.96328e-05	6.04699	hyper	0.191931	-1.62193	hypo
FMN1	15q13.3	2.07002e-05	5.8568	hyper	1.76409e-05	-6.78842	hypo
C6orf25	6p21.33	2.07609e-05	5.88634	hyper	0.972306	-0.0439874	hypo
CARHSP1	16p13.2	2.07609e-05	5.98317	hyper	0.00167824	-4.05644	hypo
TJP2	9q21.11	2.0784e-05	-6.04364	hypo	1.24641e-05	6.42175	hyper
TLX1	10q24.31	2.12681e-05	-5.97834	hypo	0.119551	-1.86212	hypo
FOXD1	5q13.2	2.24324e-05	-5.74601	hypo	1.33352e-05	6.91025	hyper
HEY2	6q22.31	2.24324e-05	-5.92053	hypo	0.00965331	3.48389	hyper
RSPO3	6q22.33	2.24324e-05	-5.76268	hypo	0.000489205	5.13645	hyper
CHCHD7	8q12.1	2.24324e-05	-5.96658	hypo	0.296697	-1.25973	hypo
DAZAP1	19p13.3	2.36076e-05	5.833	hyper	1.9138e-06	5.89889	hyper
CHI3L1	1q32.1	2.47391e-05	-6.09101	hypo	3.66585e-06	6.60505	hyper
CEBPA	19q13.11	2.59649e-05	-6.13858	hypo	1.53892e-09	9.74306	hyper
GYG2	23p22.33	2.63345e-05	-5.82004	hypo	0.394628	1.06081	hyper
COX6C	8q22.2	2.74668e-05	5.52261	hyper	0.113718	-1.83714	hypo
WDR88	19q13.11	2.80213e-05	5.74055	hyper	0.0152882	3.46012	hyper
CCL5	17q12	2.87046e-05	-5.71193	hypo	0.0178611	-2.9663	hypo
CYP24A1	20q13.2	2.87992e-05	-5.77312	hypo	0.390435	1.05488	hyper
CDGAP	3q13.32	2.90366e-05	-5.80113	hypo	0.00407158	4.30993	hyper
GALT	9p13.3	2.90366e-05	-5.63481	hypo	0.859011	-0.234315	hypo
C19orf21	19p13.3	2.90366e-05	5.78074	hyper	0.0269496	-2.91163	hypo
IL20	1q32.1	2.91998e-05	5.60658	hyper	0.00360425	-4.0714	hypo
FBN1	15q21.1	3.06852e-05	-5.53701	hypo	3.39929e-08	12.7708	hyper
SH2D2A	1q23.1	3.08927e-05	-5.82289	hypo	0.000897935	-4.14955	hypo
ITGA9	3p22.2	3.09039e-05	-5.71251	hypo	0.0327915	2.87041	hyper
CCDC134	22q13.2	3.18511e-05	-5.62917	hypo	0.000372748	4.78346	hyper
THAP3	1p36.31	3.29222e-05	5.63751	hyper	0.063476	2.32029	hyper
A2ML1	12p13.31	3.29222e-05	-5.80726	hypo	5.56465e-05	6.06113	hyper
AHNAK	11q12.3	3.34251e-05	5.68322	hyper	0.00480655	-3.34363	hypo
FLRT2	14q31.3	3.40461e-05	-5.93779	hypo	1.66313e-37	22.342	hyper
ZNF643	1p34.2	3.41393e-05	-5.80426	hypo	0.116334	-1.95466	hypo
SLC22A2	6q25.3	3.41393e-05	5.63577	hyper	3.16799e-07	-9.96215	hypo
THBS1	15q14	3.41393e-05	5.71518	hyper	0.0268786	2.89797	hyper
FAM100B	17q25.1	3.49544e-05	-5.8695	hypo	0.260695	-1.39506	hypo
KLF14	7q32.2	3.51321e-05	-5.6864	hypo	0.00703831	3.37105	hyper
EPB41L4B	9q31.3	3.67086e-05	-5.71925	hypo	0.468227	0.896144	hyper
KIAA1754	10q25.1	3.79876e-05	-5.85211	hypo	2.95624e-05	8.38721	hyper
VLDLR	9p24.2	3.91431e-05	-5.78722	hypo	6.59403e-06	8.06051	hyper
INDO	8p11.22	3.94064e-05	-5.77416	hypo	0.0278689	-2.96013	hypo
GRAMD2	15q23	3.94064e-05	-5.61301	hypo	5.6672e-06	8.0206	hyper
TMEM184A	7p22.3	3.94192e-05	5.59391	hyper	0.0603845	-2.4704	hypo
SCARA5	8p21.1	3.98215e-05	-5.47605	hypo	3.97364e-05	7.1457	hyper
TLL1	4q32.3	4.16166e-05	-5.62236	hypo	1.61768e-05	5.34711	hyper
IGFBP3	7p13	4.16166e-05	-5.77633	hypo	0.000310616	4.97712	hyper
NID2	14q22.1	4.19521e-05	-5.74205	hypo	0.000201706	5.08561	hyper
SAPS3	11q13.2	4.19521e-05	5.63402	hyper	7.80286e-10	-8.24719	hypo
RECK	9p13.3	4.23472e-05	-5.9932	hypo	1.04069e-05	7.49018	hyper
CDCA7	2q31.1	4.35149e-05	-5.73531	hypo	0.0832234	-2.05791	hypo
AGPS	2q31.2	4.37276e-05	5.55155	hyper	0.130244	1.94538	hyper
COCH	14q12	4.51807e-05	-5.83064	hypo	0.0145519	3.43528	hyper
CDH11	16q21	4.56971e-05	-5.58849	hypo	4.72549e-07	7.15756	hyper
MATR3	5q31.2	4.60734e-05	-5.62963	hypo	0.352515	-1.13182	hypo
PDIA5	3q21.1	4.63209e-05	5.55899	hyper	0.0963433	-2.06717	hypo
BCL2A1	15q25.1	4.71492e-05	-5.82615	hypo	0.169389	-1.66102	hypo
YWHAQ	2p25.1	4.73823e-05	-5.61256	hypo	0.000394691	5.12042	hyper
FXYD5	19q13.12	4.73823e-05	-5.80162	hypo	0.101026	1.98071	hyper
WNK4	17q21.31	4.76037e-05	5.59974	hyper	0.171262	1.68256	hyper
RASGRF2	5q14.1	4.79375e-05	-5.54058	hypo	0.359787	1.13583	hyper
PAOX	10q26.3	4.79375e-05	5.40338	hyper	0.792649	-0.346127	hypo
GRIK3	1p34.3	4.86686e-05	-5.56829	hypo	3.23167e-06	-6.63399	hypo
MEX3A	1q22	4.96097e-05	-5.65609	hypo	0.314524	1.19183	hyper
PHF13	1p36.31	4.98693e-05	5.61565	hyper	0.144338	1.76163	hyper
DCUN1D3	16p12.2	5.03475e-05	5.50037	hyper	0.00155362	4.88458	hyper
ACTR3B	7q36.1	5.07509e-05	-5.71852	hypo	0.00014767	5.8765	hyper
HIGD1A	3p22.1	5.08853e-05	5.33944	hyper	0.286132	-1.30276	hypo
LZTS1	8p21.3	5.08853e-05	5.5783	hyper	0.0023264	-4.4435	hypo
MARVELD2	5q13.2	5.19406e-05	5.38602	hyper	7.72676e-07	-6.48172	hypo
RERG	12p12.3	5.19406e-05	5.40634	hyper	1.39356e-06	-10.3469	hypo
FOXC1	6p25.3	5.50298e-05	-5.68789	hypo	0.0314259	-2.46816	hypo
ZNF831	20q13.32	5.61267e-05	5.38413	hyper	0.0188877	-3.32281	hypo
CYTL1	4p16.2	5.66918e-05	-5.7595	hypo	0.959724	0.0669666	hyper
FGF11	17p13.1	5.83378e-05	-5.57905	hypo	9.25682e-05	6.39374	hyper
ZNF703	8p12	5.92935e-05	5.64111	hyper	0.0736322	2.11963	hyper
MAT2B	5q34	5.97238e-05	-5.30818	hypo	2.63764e-14	11.8738	hyper
C21orf70	21q22.3	5.97268e-05	-5.6389	hypo	0.000242844	5.29139	hyper
IL31	12q24.31	5.97268e-05	5.46206	hyper	0.0317805	-2.98903	hypo
ETHE1	19q13.31	6.00388e-05	-5.46713	hypo	0.827563	-0.287533	hypo
GINS2	16q24.1	6.00388e-05	5.40117	hyper	0.0015616	-4.39582	hypo
CAV1	7q31.2	6.04719e-05	-5.40786	hypo	0.000764584	4.80934	hyper
KIT	4q12	6.05989e-05	-5.35112	hypo	0.17375	1.61728	hyper
HMGA2	12q14.3	6.05989e-05	-5.60849	hypo	3.36105e-06	6.3316	hyper
RECQL5	17q25.1	6.05989e-05	-5.61089	hypo	0.305886	1.25407	hyper
CMBL	5p15.2	6.05989e-05	5.58078	hyper	0.00352256	-3.64696	hypo
FAM57B	16p11.2	6.26292e-05	-5.61968	hypo	0.133713	1.90626	hyper
CNDP2	18q22.3	6.26292e-05	-5.5292	hypo	0.0223734	-3.00792	hypo
PLEKHG7	12q22	6.26292e-05	5.33757	hyper	0.0690076	-2.33908	hypo
RBM38	20q13.31	6.29058e-05	-5.5884	hypo	0.033983	-2.6282	hypo
GAB4	22q11.1	6.29893e-05	5.45558	hyper	0.074449	-2.28247	hypo
ASB13	10p15.1	6.36943e-05	5.48702	hyper	7.63878e-05	-6.94803	hypo
PCDHB12	5q31.3	6.38195e-05	5.57822	hyper	0.24675	1.42626	hyper
WFS1	4p16.1	6.38804e-05	5.58382	hyper	0.0229732	2.99488	hyper
RHOD	11q13.1	6.45221e-05	5.60578	hyper	0.00358197	-3.96488	hypo
FOXA1	14q21.1	6.87475e-05	5.81959	hyper	0.00165165	-4.03992	hypo
DDX3X	23p11.4	6.91524e-05	-5.46584	hypo	0.259476	1.35297	hyper
RNF170	8p11.21	6.93333e-05	5.5513	hyper	0.788622	-0.347933	hypo
BCL2	18q21.33	6.97163e-05	5.44606	hyper	0.0744026	-2.18708	hypo
TAS2R7	12p13.2	7.00234e-05	5.30054	hyper	0.101339	-2.11548	hypo
TMEM62	15q15.2	7.00234e-05	5.51463	hyper	0.00160969	-4.00321	hypo
IGFBP4	17q21.2	7.02106e-05	5.33378	hyper	0.293242	1.26266	hyper
CD97	19p13.12	7.16927e-05	-5.52484	hypo	0.237835	1.38903	hyper
HSD17B4	5q23.1	7.33213e-05	5.67649	hyper	0.204439	-1.53615	hypo
WNT2	7q31.2	7.6261e-05	-5.52406	hypo	0.0132667	3.16612	hyper
KRT1	12q13.13	7.64524e-05	5.25271	hyper	1.23207e-10	-14.0966	hypo
MARCH10	17q23.2	7.64524e-05	5.32587	hyper	0.00392894	-4.47914	hypo
CITED1	23q13.1	7.76025e-05	-5.40456	hypo	0.0736701	2.32402	hyper
NTRK1	1q23.1	7.84656e-05	-5.5403	hypo	0.255471	1.36531	hyper
ORAI1	12q24.31	7.84656e-05	-5.39488	hypo	5.2592e-06	-5.88851	hypo
ATOH8	2p11.2	7.88721e-05	-5.5027	hypo	0.88438	-0.188233	hypo
JMY	5q14.1	7.97545e-05	-5.27422	hypo	0.0289962	2.66746	hyper
PHF10	6q27	8.09247e-05	5.31681	hyper	0.569034	0.720542	hyper
HBP21	11q23.3	8.09247e-05	5.36576	hyper	0.00203463	3.94563	hyper
PROX1	1q41	8.10451e-05	-5.27631	hypo	0.000897372	5.27827	hyper
PAPSS1	4q25	8.10451e-05	-5.50238	hypo	2.19287e-05	8.01317	hyper
ERN1	17q23.3	8.10451e-05	-5.44728	hypo	0.0334362	2.863	hyper
BDKRB1	14q32.2	8.16843e-05	-5.52733	hypo	0.000550477	5.61367	hyper
C3orf32	3p26.1	8.16843e-05	5.42639	hyper	0.189924	-1.66986	hypo
RAB7L1	1q32.1	8.20143e-05	-5.35025	hypo	8.54617e-06	8.96312	hyper
IFNGR1	6q23.3	8.20143e-05	-5.45032	hypo	1.75381e-06	10.0096	hyper
PHYHD1	9q34.11	8.23927e-05	5.35763	hyper	0.000306239	5.86766	hyper
COL4A1	13q34	8.25757e-05	5.48481	hyper	0.065396	-2.24978	hypo
C1QL1	17q21.31	8.2839e-05	-5.39713	hypo	1.22415e-08	9.31421	hyper
ARHGAP10	4q31.23	8.31352e-05	-5.55854	hypo	6.00938e-11	10.647	hyper
ELK3	12q23.1	8.32422e-05	-5.55614	hypo	0.000201074	6.01836	hyper
EMID1	22q12.2	8.32422e-05	-5.44951	hypo	0.00863602	3.52919	hyper
C7orf16	7p15.1	8.32422e-05	5.37718	hyper	5.59093e-09	-9.82712	hypo
PCBP3	21q22.3	8.32422e-05	5.18463	hyper	1.34755e-06	-7.6016	hypo
ZP4	1q43	8.46905e-05	5.45029	hyper	8.52634e-11	-12.5331	hypo
REXO1	19p13.3	8.79442e-05	5.24064	hyper	0.898378	-0.166392	hypo
RASSF10	11p15.2	9.12262e-05	-5.54268	hypo	5.54826e-08	8.77902	hyper
HERPUD2	7p14.2	9.27878e-05	-5.15659	hypo	0.0135842	-3.41188	hypo
COMTD1	10q22.2	9.28645e-05	5.29794	hyper	0.133733	-1.9498	hypo
C9orf106	9q34.11	9.556e-05	5.3562	hyper	0.00682135	3.49892	hyper
NFATC4	14q12	9.556e-05	5.22248	hyper	0.268987	1.36621	hyper
MAFA	8q24.3	9.67493e-05	-5.24721	hypo	0.000379811	5.4283	hyper
TLE4	9q21.31	9.69849e-05	-5.29486	hypo	1.36923e-10	14.1221	hyper
KRT6C	12q13.13	9.89269e-05	5.08804	hyper	0.0126258	-3.53457	hypo
TP53BP2	1q41	9.90202e-05	-5.51777	hypo	0.520193	0.791791	hyper
DNAJC12	10q21.3	9.9347e-05	5.25235	hyper	0.348432	-1.16491	hypo
STAMBP	2p13.1	9.99961e-05	-5.27294	hypo	0.0321968	2.86579	hyper
BHLHB3	12p12.1	9.99961e-05	-5.14073	hypo	1.7745e-05	6.01695	hyper
CORO2B	15q23	9.99961e-05	-5.38444	hypo	0.00037435	5.36267	hyper
CXXC5	5q31.3	9.99961e-05	5.35355	hyper	0.985485	-0.0210829	hypo
IVNS1ABP	1q25.3	0.00010026	-5.205	hypo	0.168062	1.73161	hyper
MBOAT5	12p13.31	0.00010114	5.3638	hyper	0.0888963	2.07889	hyper
RHOC	1p13.2	0.000101421	5.25182	hyper	0.0614016	2.25009	hyper
FZD9	7q11.23	0.000102334	5.16376	hyper	0.151299	-1.84206	hypo
BHLHB8	7q21.3	0.000102334	5.1724	hyper	0.519877	0.810188	hyper
KIAA0100	17q11.2	0.000102385	5.31932	hyper	0.179533	1.65209	hyper
SLFN11	17q12	0.000102471	-5.15132	hypo	0.00266925	4.11217	hyper
FAM110C	2p25.3	0.000102471	5.24009	hyper	0.00185848	3.88044	hyper
TRIP13	5p15.33	0.000102906	5.19503	hyper	0.00013827	-6.43746	hypo
ADCY4	14q12	0.000103807	-5.45778	hypo	3.44516e-12	9.81862	hyper
AGR2	7p21.1	0.000104042	5.26362	hyper	0.316178	-1.20006	hypo
OR4N5	14q11.2	0.000104448	5.35285	hyper	0.660886	-0.550222	hypo
OR4K1	14q11.2	0.000105074	5.28651	hyper	3.56618e-05	-6.97289	hypo
C1orf183	1p13.2	0.000108481	-5.36142	hypo	3.40568e-11	11.4886	hyper
KCNK9	8q24.3	0.000108481	-5.34862	hypo	2.47833e-07	7.86245	hyper
LEMD1	1q32.1	0.000108818	5.0692	hyper	0.0226005	-3.31967	hypo
ELMO3	16q22.1	0.000108946	5.19489	hyper	0.215717	-1.57354	hypo
FAM43B	1p36.12	0.000109714	-5.26999	hypo	0.000357723	5.2398	hyper
ZFAT	8q24.22	0.000111357	5.19189	hyper	0.0292237	-2.87396	hypo
ABCB8	7q36.1	0.000112669	5.2015	hyper	0.0266388	-2.91327	hypo
SLC26A1	4p16.3	0.000113183	5.14283	hyper	0.0317805	-2.9333	hypo
GRHL3	1p36.11	0.00011409	-5.36254	hypo	0.440262	0.954845	hyper
CCDC129	7p15.1	0.000114735	5.10457	hyper	0.000371854	-5.72734	hypo
BMP6	6p24.3	0.000117152	-5.31646	hypo	0.0189297	2.89753	hyper
PTCH1	9q22.32	0.000117152	-5.06039	hypo	0.368185	1.1025	hyper
OASL	12q24.31	0.000117152	-5.35133	hypo	4.73047e-05	-5.80307	hypo
C1orf113	1p34.3	0.000117434	5.2006	hyper	0.0696799	2.39911	hyper
SNAP25	20p12.2	0.000117434	-5.3881	hypo	1.19212e-07	10.1837	hyper
RAPGEF1	9q34.13	0.000117605	-5.37148	hypo	4.61843e-05	6.48959	hyper
CCDC90A	6p23	0.000117605	5.24455	hyper	0.00096462	4.22312	hyper
EPS8L2	11p15.5	0.000117605	5.27784	hyper	0.590144	-0.665799	hypo
TLR1	4p14	0.000117767	-5.28123	hypo	0.0480858	2.4053	hyper
UGCG	9q31.3	0.000119248	5.366	hyper	0.830772	0.283342	hyper
SEMA3C	7q21.11	0.000119474	5.2277	hyper	0.000147471	-4.54018	hypo
PTGES	9q34.11	0.000119474	5.13596	hyper	0.000670771	4.36171	hyper
EIF4A1	17p13.1	0.000119811	-5.0788	hypo	0.291515	1.27025	hyper
NRN1	6p25.1	0.000121779	-5.20601	hypo	0.0403134	2.82547	hyper
HOXC11	12q13.13	0.000121779	-5.05982	hypo	0.190452	1.54766	hyper
MTMR12	5p13.3	0.000122453	5.16173	hyper	9.63868e-10	-8.75114	hypo
MCHR1	22q13.2	0.000126755	5.24694	hyper	0.480127	0.86125	hyper
RBM22	5q33.1	0.000127764	5.2168	hyper	0.00189577	5.04543	hyper
EMX2	10q26.11	0.000133198	-5.26679	hypo	0.445935	0.922036	hyper
CRYAA	21q22.3	0.000137757	5.14645	hyper	0.104967	-2.08302	hypo
ACHE	7q22.1	0.000143297	5.10539	hyper	0.000764584	-5.22296	hypo
TRIM9	14q22.1	0.000143583	-5.18733	hypo	3.61434e-14	13.5565	hyper
DYRK2	12q15	0.000145805	-5.13878	hypo	0.000774799	6.03192	hyper
CPT1A	11q13.2	0.000146286	-5.05662	hypo	0.00639673	3.83801	hyper
SH2B3	12q24.12	0.000146286	-5.16334	hypo	5.86055e-05	6.42495	hyper
ABCA3	16p13.3	0.000146286	5.22916	hyper	0.641624	0.594806	hyper
LOX	5q23.1	0.000146899	-4.99246	hypo	0.0440365	2.59831	hyper
CDH3	16q22.1	0.000151929	-5.07422	hypo	2.84416e-05	7.45524	hyper
DNM3	1q24.3	0.000153413	-5.19055	hypo	1.89797e-05	8.39167	hyper
KCNIP1	5q35.1	0.000161245	5.07263	hyper	2.62484e-06	-6.85797	hypo
KIAA1370	15q21.2	0.000163595	5.10748	hyper	2.39206e-07	-7.31819	hypo
SRGAP1	12q14.2	0.000165883	5.04828	hyper	0.00264327	4.33993	hyper
TMEM48	1p32.3	0.000166745	5.193	hyper	0.014567	-3.53113	hypo
RIPK4	21q22.3	0.000166745	-5.19251	hypo	0.978912	0.0318609	hyper
SLC18A1	8p21.3	0.000167821	4.99799	hyper	0.205512	-1.60577	hypo
ADORA2B	17p12	0.000168281	-5.03641	hypo	2.33182e-06	11.4648	hyper
SUB1	5p13.3	0.000168651	-5.13464	hypo	0.845023	0.254032	hyper
SNX30	9q32	0.000170725	-5.02772	hypo	0.0327915	2.7493	hyper
COL12A1	6q14.1	0.000170856	-5.17948	hypo	0.475718	-0.892567	hypo
NPR3	5p13.3	0.000172924	-5.11924	hypo	0.42762	0.959306	hyper
CDKN2A	9p21.3	0.000172924	-5.26258	hypo	0.376945	1.07754	hyper
SCNN1B	16p12.1	0.000172924	-5.21174	hypo	0.199579	1.51947	hyper
PSMA7	20q13.33	0.000172924	-5.01331	hypo	0.584048	0.676177	hyper
ADH5	4q23	0.000173275	-5.04503	hypo	0.821137	0.302919	hyper
CDC2L6	6q21	0.000173275	-5.13634	hypo	0.000523327	-4.97169	hypo
MYEOV2	2q37.3	0.000173275	4.96667	hyper	0.884319	0.187822	hyper
KCTD21	11q14.1	0.000173275	4.97235	hyper	0.133361	1.87246	hyper
MAPK3	16p11.2	0.000173275	5.0874	hyper	0.0919404	2.19242	hyper
CAPN9	1q42.2	0.00017472	5.06876	hyper	3.26798e-10	-10.8196	hypo
TNP2	16p13.13	0.000176786	4.9451	hyper	0.635763	0.60674	hyper
NT5C2	10q24.33	0.00017947	-5.15578	hypo	3.35186e-06	8.92461	hyper
GRIA1	5q33.2	0.000180331	-5.22505	hypo	4.63932e-06	6.04581	hyper
NDUFS2	1q23.3	0.000183519	-4.98687	hypo	0.589357	-0.673861	hypo
QSOX2	9q34.3	0.00018505	-5.19106	hypo	0.174692	-1.65224	hypo
TMEM138	11q12.2	0.00018505	-5.13984	hypo	0.700708	-0.487479	hypo
POLR2E	19p13.3	0.000185239	4.96743	hyper	0.678558	-0.528808	hypo
DNAJA4	15q25.1	0.000187163	5.0293	hyper	1.42146e-06	-6.33832	hypo
PAPD1	10p11.23	0.000190653	-5.13335	hypo	0.328702	-1.22132	hypo
BTG2	1q32.1	0.000191349	5.22556	hyper	0.358336	-1.12932	hypo
HRK	12q24.22	0.000192236	-4.98344	hypo	0.0939334	2.01104	hyper
S100A2	1q21.3	0.000194095	-5.13033	hypo	0.0317805	2.75852	hyper
ME2	18q21.2	0.000195881	-5.05215	hypo	0.00338011	-4.35104	hypo
AHI1	6q23.3	0.000196485	4.98466	hyper	0.000969572	4.79242	hyper
SLC1A2	11p13	0.0001972	-5.25076	hypo	0.00461142	3.60776	hyper
TRIP10	19p13.3	0.0001972	-4.96385	hypo	0.00405908	3.53449	hyper
ZNRF3	22q12.1	0.0001972	4.94365	hyper	0.674522	-0.528659	hypo
SLC14A1	18q12.3	0.00019896	-5.19194	hypo	0.586281	0.679966	hyper
PRSS23	11q14.2	0.000203259	5.04347	hyper	0.303564	1.27638	hyper
FASN	17q25.3	0.000204268	5.00262	hyper	0.340854	-1.17607	hypo
FCGRT	19q13.33	0.000208316	4.95428	hyper	3.49685e-07	10.0565	hyper
LRIG3	12q14.1	0.000216664	-5.05352	hypo	2.89083e-07	12.0861	hyper
TSGA10	2q11.2	0.000216664	4.99709	hyper	0.00333041	4.34122	hyper
ZNF24	18q12.2	0.000216909	5.09372	hyper	0.0101566	-3.47495	hypo
SNX5	20p11.23	0.000217535	-5.08174	hypo	0.0016169	4.75028	hyper
FOXN1	17q11.2	0.000219129	5.10882	hyper	0.123374	-1.93038	hypo
SLC7A2	8p22	0.000224708	4.95139	hyper	5.85034e-05	-6.69238	hypo
GSTCD	4q24	0.000225094	5.00429	hyper	0.305441	-1.23601	hypo
IFRG15	1q25.2	0.000225212	4.89819	hyper	4.22043e-06	-6.66982	hypo
HPN	19q13.11	0.000225212	4.99687	hyper	0.177346	1.71345	hyper
SBF2	11p15.4	0.000225868	-4.98828	hypo	5.7507e-11	12.1641	hyper
MYLK4	6p25.2	0.000227813	5.0748	hyper	3.39581e-05	-8.49091	hypo
NGDN	14q11.2	0.00022991	-5.01101	hypo	0.0608573	2.51119	hyper
MLPH	2q37.3	0.000232019	5.08507	hyper	4.26108e-08	-7.88868	hypo
MCOLN2	1p22.3	0.000236744	-4.96447	hypo	0.00338011	3.72104	hyper
SUMO2	17q25.1	0.000238793	-4.96118	hypo	0.00958691	-3.49666	hypo
OR5W2	11q11	0.000239192	4.97057	hyper	0.0674892	-2.36022	hypo
DMRTB1	1p32.3	0.000239327	4.85799	hyper	0.00235137	-4.34337	hypo
IL10	1q32.1	0.000239327	-5.02002	hypo	0.000450775	-4.71567	hypo
ANAPC10	4q31.22	0.000239327	-5.03326	hypo	0.00452272	4.28448	hyper
GPR139	16p12.3	0.000239585	-5.17924	hypo	8.69217e-05	4.99409	hyper
ZNF295	21q22.3	0.000239585	-4.92074	hypo	0.604394	0.649763	hyper
FTCD	21q22.3	0.000239585	4.88934	hyper	0.241285	-1.4622	hypo
RHOB	2p24.1	0.000242818	4.94563	hyper	0.317027	1.21123	hyper
ABCC6	16p13.11	0.000244647	-4.90066	hypo	1.53432e-07	8.84455	hyper
C6orf106	6p21.31	0.000245863	-4.98155	hypo	0.048233	2.56287	hyper
NAP5	2q21.2	0.000245863	4.99412	hyper	0.000463122	-6.06865	hypo
S100PBP	1p35.1	0.000252167	-4.91323	hypo	0.00578342	-4.236	hypo
LRRC17	7q22.1	0.000252167	-5.13535	hypo	0.195447	1.66011	hyper
C19orf62	19p13.11	0.000256604	-4.99066	hypo	0.051448	2.56395	hyper
PSMB4	1q21.3	0.000260537	-5.10266	hypo	0.292437	1.27832	hyper
IL1B	2q13	0.000260537	-4.98268	hypo	0.00952331	-3.69209	hypo
TACC1	8p11.23	0.000260537	-4.92502	hypo	1.24828e-07	8.52746	hyper
ITGB3	17q21.32	0.000260537	-4.97765	hypo	0.00265163	3.99951	hyper
COMP	19p13.11	0.000260537	-4.9894	hypo	0.000341256	4.54013	hyper
PANX1	11q21	0.000262686	-4.96302	hypo	0.0792599	2.09819	hyper
PPFIBP2	11p15.4	0.000264255	-4.97899	hypo	0.000446177	5.90014	hyper
IL4R	16p12.1	0.000266096	-5.02313	hypo	0.0319575	2.71927	hyper
HOXA10	7p15.2	0.000267455	-5.03413	hypo	0.00142674	-4.80957	hypo
CD28	2q33.2	0.000267971	-5.01188	hypo	2.13765e-07	-7.67923	hypo
GALNT4	12q21.33	0.000267971	4.79758	hyper	0.0965263	-1.99615	hypo
KIAA1033	12q23.3	0.000270614	-5.01176	hypo	0.783195	0.363462	hyper
RNF10	12q24.31	0.000270614	4.97502	hyper	0.00126287	3.81184	hyper
OFCC1	6p24.3	0.000271299	-4.98878	hypo	0.00013827	7.15867	hyper
IL20RA	6q23.3	0.000272497	4.89183	hyper	0.000903196	-4.48681	hypo
KIAA1324	1p13.3	0.000273684	-4.77597	hypo	0.494517	-0.846966	hypo
PRKRA	2q31.2	0.000273684	-4.94431	hypo	5.82813e-08	12.3502	hyper
TRIM22	11p15.4	0.000273684	-5.00053	hypo	0.00215991	4.83269	hyper
BMP2	20p12.3	0.000273684	-4.90367	hypo	4.05591e-07	7.57685	hyper
TRERF1	6p21.1	0.000274094	5.06491	hyper	0.0568022	-2.53485	hypo
UBE2J2	1p36.33	0.000275334	4.88245	hyper	0.123198	1.96589	hyper
C1orf151	1p36.13	0.000275334	4.86948	hyper	1.05928e-07	-9.26284	hypo
CHST3	10q22.1	0.000275334	-4.79028	hypo	0.000764584	5.28997	hyper
CMTM8	3p22.3	0.000276671	4.88792	hyper	0.0603896	-2.43184	hypo
SLC24A6	12q24.13	0.000277615	-4.88	hypo	0.0330535	2.73249	hyper
SPIRE1	18p11.21	0.000278885	4.83364	hyper	0.0225307	-2.77379	hypo
RAB40C	16p13.3	0.00027979	4.95923	hyper	0.00185848	-4.18967	hypo
ADCY9	16p13.3	0.000282773	4.90123	hyper	0.142951	1.80082	hyper
CCDC130	19p13.13	0.000282773	5.07644	hyper	0.709774	-0.474111	hypo
WIZ	19p13.12	0.00028346	4.92261	hyper	0.0227481	3.19638	hyper
MYST4	10q22.2	0.000285063	4.93002	hyper	0.0256108	-2.81182	hypo
FAM128B	2q21.1	0.000285884	4.84461	hyper	0.291515	-1.32351	hypo
HIF1A	14q23.2	0.000291751	-4.80214	hypo	0.00212435	4.45217	hyper
TLL2	10q24.1	0.000291766	-4.91674	hypo	0.082746	2.18236	hyper
IGSF21	1p36.13	0.000292225	-5.05919	hypo	0.632805	-0.59578	hypo
PBEF1	7q22.2	0.000292827	-4.92217	hypo	0.0150218	3.27752	hyper
S100A12	1q21.3	0.000294978	4.88678	hyper	0.0012985	-4.88	hypo
ZDHHC18	1p36.11	0.00029655	-4.96293	hypo	1.03166e-05	7.66187	hyper
FLJ10769	13q34	0.000297505	4.89978	hyper	0.133453	-1.77309	hypo
GYPC	2q14.3	0.000297538	-4.83959	hypo	7.21108e-07	8.02532	hyper
CLN8	8p23.3	0.000305009	4.77371	hyper	0.0510772	2.42231	hyper
KIAA1310	2q11.2	0.000308186	4.86572	hyper	0.0271408	2.7711	hyper
ABHD10	3q13.2	0.000310924	4.91701	hyper	7.80385e-06	7.90157	hyper
GRID2	4q22.1	0.000311568	-4.84111	hypo	2.24069e-07	9.13067	hyper
C8orf46	8q13.1	0.000311919	-4.97654	hypo	1.59366e-08	11.4209	hyper
SH3BGR	21q22.2	0.000315324	4.71108	hyper	0.0953886	2.01028	hyper
IL10RA	11q23.3	0.000318173	-4.93766	hypo	8.88765e-08	-7.7016	hypo
OR5B3	11q12.1	0.000318173	4.81716	hyper	0.0681257	-2.24492	hypo
KLK9	19q13.33	0.000318173	4.81812	hyper	0.321479	-1.22376	hypo
LRIT1	10q23.1	0.000322304	4.81562	hyper	0.000485088	-5.55765	hypo
BAMBI	10p11.23	0.000322519	-4.78672	hypo	0.00799836	-4.15818	hypo
C1orf93	1p36.32	0.000327883	4.94388	hyper	0.000258489	-5.48635	hypo
BAALC	8q22.3	0.000327883	-4.9543	hypo	0.217607	1.5358	hyper
RARG	12q13.13	0.000331967	4.85962	hyper	0.0303214	2.78834	hyper
GPR108	19p13.3	0.000335114	-4.71761	hypo	0.400396	-1.01675	hypo
OMA1	1p32.1	0.000335483	4.75168	hyper	0.0233327	-2.96256	hypo
RBP1	3q23	0.000336399	-4.88364	hypo	0.959724	-0.0663612	hypo
STX1A	7q11.23	0.000337114	-4.93563	hypo	0.0376855	-2.58536	hypo
IL17RA	22q11.1	0.000337114	-4.83365	hypo	7.91249e-07	9.01738	hyper
PRRT1	6p21.32	0.000337114	4.75836	hyper	0.121639	1.95679	hyper
MTL5	11q13.2	0.000337114	4.83639	hyper	0.000831704	-4.19511	hypo
FZR1	19p13.3	0.000337114	4.75859	hyper	0.195566	-1.61327	hypo
BRAP	12q24.12	0.000340506	4.71605	hyper	0.144686	1.80658	hyper
HSPB8	12q24.23	0.000340506	4.84674	hyper	0.552999	-0.739644	hypo
MYO1G	7p13	0.000343646	-4.8362	hypo	0.745492	-0.417825	hypo
CAP2	6p22.3	0.000344816	4.77776	hyper	0.694466	-0.502677	hypo
GALNS	16q24.3	0.000345191	4.71793	hyper	0.784831	0.358573	hyper
NRK	23q22.3	0.000345322	-4.78735	hypo	0.000408092	5.29669	hyper
OR4K13	14q11.2	0.000353783	4.83127	hyper	7.40344e-07	-7.4282	hypo
C21orf66	21q22.11	0.000358048	-4.76411	hypo	0.101886	2.10097	hyper
KIF21B	1q32.1	0.000361051	-4.88809	hypo	0.416263	0.972692	hyper
ENOX1	13q14.11	0.000361197	-4.88807	hypo	0.00374423	4.63973	hyper
INTS1	7p22.3	0.000361197	4.75845	hyper	0.0536063	-2.58025	hypo
ABCB4	7q21.12	0.000367515	-4.98747	hypo	7.00447e-05	5.62737	hyper
ITGA4	2q31.3	0.000368855	-4.93737	hypo	0.00405908	3.82731	hyper
C2orf57	2q37.1	0.000368855	4.77548	hyper	0.000420132	-6.26931	hypo
NUAK1	12q23.3	0.000370836	-4.86393	hypo	0.00622723	4.09192	hyper
SLC6A15	12q21.31	0.000372608	-4.77518	hypo	0.608359	0.642758	hyper
C22orf23	22q13.1	0.000374566	-4.84274	hypo	0.0788708	-2.24458	hypo
CBLC	19q13.31	0.000375765	4.75001	hyper	0.0352078	-2.80232	hypo
PODXL	7q32.3	0.000376653	-4.83659	hypo	0.000550477	5.78514	hyper
EML4	2p21	0.000381302	-4.80049	hypo	0.000831704	5.02005	hyper
PLCL2	3p24.3	0.000381302	-4.80864	hypo	0.000238137	5.32351	hyper
PDCD4	10q25.2	0.000381302	4.97071	hyper	1.25008e-08	9.92419	hyper
PARD6B	20q13.13	0.000384163	4.71694	hyper	9.71676e-06	-6.80129	hypo
SGPP2	2q36.1	0.000390521	-4.84221	hypo	0.355443	1.13487	hyper
C10orf125	10q26.3	0.000390521	4.76414	hyper	0.133453	-1.9236	hypo
DNMBP	10q24.2	0.000392887	4.74945	hyper	0.00121167	-4.72924	hypo
CACHD1	1p31.3	0.000397309	-4.83268	hypo	3.81625e-07	10.8111	hyper
PHC1	12p13.31	0.000397309	4.7521	hyper	0.00021305	6.32661	hyper
ZCRB1	12q12	0.000397309	4.70598	hyper	0.131954	-1.88205	hypo
C1orf106	1q32.1	0.000405912	-4.83522	hypo	0.262385	-1.35692	hypo
MKI67	10q26.2	0.000407793	-4.66206	hypo	0.328976	-1.19815	hypo
MOSC2	1q41	0.000409162	-4.61259	hypo	0.0149725	3.3949	hyper
MED27	9q34.13	0.000413665	-4.70332	hypo	2.93305e-09	9.78388	hyper
NUDT18	8p21.3	0.000417227	4.71673	hyper	0.146529	-1.7577	hypo
EREG	4q13.3	0.000417826	-4.69926	hypo	0.0282202	-3.06044	hypo
ADA	20q13.12	0.000419427	-4.84577	hypo	0.908465	-0.151258	hypo
CENPN	16q23.2	0.000423182	-4.76273	hypo	0.0244177	-2.89947	hypo
DCLK2	4q31.3	0.000427335	4.74291	hyper	4.64944e-06	-6.92941	hypo
ERAP2	5q15	0.000429774	-4.77192	hypo	0.128806	1.89866	hyper
RARA	17q21.2	0.00043147	4.73261	hyper	0.00675844	3.27047	hyper
OR10G2	14q11.2	0.000432249	-4.75067	hypo	0.0391272	-2.57311	hypo
PRR5	22q13.31	0.000435933	-4.88419	hypo	0.0412091	2.65953	hyper
AP2B1	17q12	0.000436592	4.74938	hyper	0.0001038	-6.34503	hypo
CHAD	17q21.33	0.000436592	4.68157	hyper	0.925614	-0.123417	hypo
PRMT8	12p13.32	0.000442129	-4.84359	hypo	0.00306938	3.62573	hyper
DHX58	17q21.2	0.000448913	4.65713	hyper	0.000969572	-4.969	hypo
RNPEP	1q32.1	0.000453552	4.8444	hyper	0.133404	-1.9435	hypo
GLRX5	14q32.13	0.000455156	4.75824	hyper	0.635315	0.596067	hyper
LSR	19q13.12	0.000455156	4.69473	hyper	0.0205198	3.06421	hyper
GLS	2q32.2	0.000462284	-4.74001	hypo	0.000240737	5.30599	hyper
FYB	5p13.1	0.000465254	-4.77857	hypo	0.000226431	-5.79944	hypo
IGFBP7	4q12	0.000465849	-4.70986	hypo	0.000256575	4.95176	hyper
PPTC7	12q24.11	0.000465854	-4.69685	hypo	0.249196	1.45164	hyper
CYP2F1	19q13.2	0.000465854	-4.90026	hypo	0.000781825	4.32507	hyper
CDKN2AIPNL	5q31.1	0.000465854	4.81234	hyper	0.0723285	-2.44904	hypo
PCDHA2	5q31.3	0.000465854	4.74179	hyper	0.963903	0.057883	hyper
C18orf1	18p11.21	0.000465854	4.75546	hyper	0.125526	-1.93397	hypo
C1orf149	1p34.3	0.000466391	4.78484	hyper	0.385164	-1.07727	hypo
C11orf35	11p15.5	0.000466391	4.69896	hyper	0.552184	-0.750341	hypo
KRAS	12p12.1	0.000466391	4.7007	hyper	0.827054	0.28902	hyper
ELAVL4	1p33	0.000469217	-4.91577	hypo	0.000190954	5.17803	hyper
FOXD4L6	9q12	0.00046958	-4.79418	hypo	0.641624	0.587907	hyper
TGFB2	1q41	0.000470312	-4.64689	hypo	3.38873e-07	8.48903	hyper
ELF5	11p13	0.000474926	-4.85411	hypo	0.00824807	-3.36715	hypo
ADCK5	8q24.3	0.000474926	4.75734	hyper	0.27383	1.37307	hyper
CPEB2	4p15.33	0.000483976	4.6664	hyper	0.553572	0.746586	hyper
GUSB	7q11.21	0.000484548	4.77387	hyper	0.0104594	-3.80246	hypo
C19orf39	19p13.2	0.000488047	-4.69538	hypo	0.591917	-0.678475	hypo
BTF3	5q13.2	0.000488047	4.74931	hyper	0.020334	3.19244	hyper
LAP3	4p15.32	0.000488205	-4.66533	hypo	0.00161286	-5.2053	hypo
C20orf75	20p12.3	0.000489662	-4.67387	hypo	0.160304	1.79732	hyper
C20orf24	20q11.23	0.000489662	-4.66657	hypo	0.730408	-0.442774	hypo
KIF14	1q32.1	0.000489963	4.72643	hyper	0.000276559	-7.05108	hypo
ETV5	3q27.2	0.000489963	-4.69586	hypo	1.94284e-05	6.77434	hyper
BMPER	7p14.3	0.000489963	-4.76069	hypo	0.00028095	5.46523	hyper
WARS	14q32.2	0.000489963	-4.79721	hypo	0.522681	0.784522	hyper
PCDHGA2	5q31.3	0.000489963	4.6846	hyper	0.0844278	2.20615	hyper
SUSD3	9q22.31	0.000489963	4.73228	hyper	2.00059e-08	-7.98865	hypo
HRASLS3	11q13.1	0.000489963	4.75745	hyper	0.73662	-0.433498	hypo
LDHB	12p12.1	0.000493649	-4.63119	hypo	0.388896	-1.03908	hypo
SPP2	2q37.1	0.000504614	4.67273	hyper	0.000591351	-5.51201	hypo
DNMT3L	21q22.3	0.000504614	4.65437	hyper	0.0570421	-2.55217	hypo
CLDN16	3q28	0.000505444	4.59074	hyper	3.57306e-07	-8.53794	hypo
DOK1	2p13.1	0.000505476	4.62912	hyper	0.17006	-1.70544	hypo
GALR2	17q25.1	0.000505476	-4.72588	hypo	0.000654162	4.74793	hyper
CDK6	7q21.2	0.000513447	-4.78629	hypo	0.671325	0.531398	hyper
MCM5	22q12.3	0.000513447	-4.72605	hypo	3.15963e-06	-7.40532	hypo
TRPM3	9q21.11	0.000513447	4.66537	hyper	0.0826934	-2.11805	hypo
MUC16	19p13.2	0.000513447	4.60758	hyper	0.000907777	-4.51849	hypo
AMD1	6q21	0.000515052	-4.70388	hypo	0.0018379	-4.45972	hypo
A26C2	14q11.1	0.000515052	4.6445	hyper	1.61086e-05	-6.72709	hypo
UBAC2	13q32.3	0.000529563	-4.74333	hypo	4.49901e-06	-7.94383	hypo
PITPNM2	12q24.31	0.000529563	4.69864	hyper	0.224631	-1.4897	hypo
FRMD3	9q21.32	0.000529815	-4.69477	hypo	0.0200596	3.27338	hyper
CDC42EP3	2p22.2	0.000533223	-4.64613	hypo	0.000838076	5.20375	hyper
ANKS6	9q22.33	0.000533768	-4.72667	hypo	0.0187268	3.13361	hyper
SPINK2	4q12	0.000535308	-4.68349	hypo	0.00507372	-3.52073	hypo
CUEDC1	17q22	0.000535308	4.72811	hyper	0.923386	-0.128671	hypo
CST11	20p11.21	0.000536455	-4.64826	hypo	0.03398	2.63108	hyper
PAQR3	4q21.21	0.000537373	-4.65837	hypo	0.102139	2.09555	hyper
TFF3	21q22.3	0.000542319	4.61727	hyper	0.66189	-0.555214	hypo
HOXA2	7p15.2	0.000542632	4.64295	hyper	3.25516e-08	8.53081	hyper
BOK	2q37.3	0.000547403	4.63109	hyper	0.00709694	-3.82664	hypo
ITPK1	14q32.12	0.000547425	4.70202	hyper	1.12022e-13	-12.5679	hypo
B3GNT8	19q13.2	0.000556742	4.63435	hyper	0.133713	-1.88545	hypo
EMR2	19p13.12	0.000556802	-4.78295	hypo	0.013256	-3.06344	hypo
POU3F3	2q12.1	0.000561907	-4.80624	hypo	1.08262e-07	8.91811	hyper
TUBA8	22q11.21	0.000561907	-4.5715	hypo	0.235248	-1.47004	hypo
RAB17	2q37.3	0.000563634	4.52459	hyper	0.00108275	-4.45522	hypo
HNRPAB	5q35.3	0.000563634	-4.64482	hypo	0.575509	-0.710553	hypo
HAO1	20p12.3	0.000568034	4.6195	hyper	0.00428605	-4.09694	hypo
MFSD7	4p16.3	0.000581945	4.68782	hyper	0.423779	-0.973091	hypo
ARRB1	11q13.4	0.000581945	4.62129	hyper	0.0021757	3.97279	hyper
SCG3	15q21.2	0.000589373	-4.66102	hypo	2.12075e-12	10.9257	hyper
TMEM26	10q21.2	0.000592985	4.71509	hyper	0.329327	-1.18425	hypo
CNNM4	2q11.2	0.00059711	4.52298	hyper	1.26743e-05	-7.80744	hypo
CPAMD8	19p13.11	0.00059939	-4.54736	hypo	0.0111896	3.46014	hyper
ATP13A5	3q29	0.00059939	4.47966	hyper	0.00322029	-3.93438	hypo
C1D	2p14	0.000605552	4.59825	hyper	0.0529673	-2.52699	hypo
NFAM1	22q13.2	0.000605552	-4.64899	hypo	4.49901e-06	6.62688	hyper
KANK3	19p13.2	0.000608944	-4.66661	hypo	0.429031	-0.954205	hypo
MGC29506	5q31.2	0.000608944	4.72471	hyper	0.00294035	-3.80859	hypo
PLEKHA1	10q26.13	0.000612839	4.61724	hyper	0.00796005	3.77891	hyper
KIAA0319L	1p34.3	0.000615938	4.61397	hyper	0.00113997	4.31675	hyper
PRG2	11q12.1	0.000615938	4.49267	hyper	1.25477e-10	-12.7967	hypo
COASY	17q21.31	0.000623196	4.78134	hyper	0.619797	-0.632616	hypo
OLFM2	19p13.2	0.00062672	-4.587	hypo	0.217645	1.54079	hyper
DMTF1	7q21.12	0.00062672	4.60957	hyper	0.00639689	3.51493	hyper
LIPC	15q22.1	0.000627783	-4.57275	hypo	0.00126204	4.95238	hyper
ST3GAL5	2p11.2	0.000633299	-4.57888	hypo	0.3917	1.03769	hyper
BCAN	1q23.1	0.000633525	-4.73629	hypo	0.91628	0.140061	hyper
RPRM	2q23.3	0.000636159	-4.54807	hypo	3.49826e-06	6.6505	hyper
GNG4	1q42.3	0.000640658	-4.6585	hypo	0.242699	-1.44119	hypo
VGF	7q22.1	0.000640693	-4.61453	hypo	0.224872	1.49436	hyper
ZDHHC22	14q24.3	0.000642966	-4.46473	hypo	0.352239	1.14063	hyper
BCDIN3D	12q13.13	0.000644407	4.57824	hyper	0.377672	-1.07431	hypo
ZNF552	19q13.43	0.000647638	4.54829	hyper	5.3177e-05	-8.31559	hypo
HES2	1p36.31	0.00064973	-4.62928	hypo	0.808538	-0.318709	hypo
MYLK	3q21.1	0.00064973	-4.74752	hypo	0.00140953	4.20107	hyper
GNAO1	16q13	0.000654818	-4.62446	hypo	1.43022e-05	7.89577	hyper
GDF11	12q13.2	0.00066882	-4.61395	hypo	0.000492271	5.09904	hyper
LOC400451	15q26.1	0.00066882	4.53742	hyper	0.00475622	-3.38853	hypo
KIAA1975	10q23.2	0.000671972	4.60102	hyper	0.235497	1.44557	hyper
KSR2	12q24.23	0.000672302	-4.78419	hypo	0.363721	1.13313	hyper
MED13L	12q24.21	0.0006758	4.6012	hyper	1.2741e-05	8.03621	hyper
LYPLAL1	1q41	0.000676032	-4.58478	hypo	4.6665e-06	8.86056	hyper
KCNK5	6p21.2	0.000676032	-4.64649	hypo	0.0780499	2.26475	hyper
C5orf37	5q13.3	0.000677018	4.62558	hyper	0.0176552	-3.57845	hypo
C20orf149	20q13.33	0.000677018	4.51976	hyper	0.245403	-1.41502	hypo
KRT71	12q13.13	0.000677492	4.52733	hyper	7.14331e-09	-9.80616	hypo
OR2T27	1q44	0.000677546	4.47629	hyper	1.81555e-05	-7.58445	hypo
C10orf46	10q26.11	0.000677546	4.56672	hyper	0.486067	0.855968	hyper
C6orf65	6p12.1	0.000679167	-4.60743	hypo	0.000511158	5.53034	hyper
C9orf52	9p22.3	0.000679167	4.63651	hyper	0.0108174	-3.74615	hypo
KIAA0754	1p34.2	0.00069094	-4.61123	hypo	1.53694e-06	11.7261	hyper
PGLYRP4	1q21.3	0.000698471	4.53042	hyper	7.0184e-05	-5.41131	hypo
YES1	18p11.32	0.000698471	-4.6016	hypo	4.58307e-11	15.1032	hyper
TMEM177	2q14.2	0.000699444	4.49247	hyper	0.694466	0.506713	hyper
SVIL	10p11.23	0.000704146	-4.55811	hypo	3.64801e-05	7.60008	hyper
PROM1	4p15.32	0.000705784	-4.65826	hypo	0.599601	-0.662345	hypo
SCPEP1	17q22	0.000705784	-4.55833	hypo	0.0606046	2.52926	hyper
C6orf221	6q13	0.000705784	4.4299	hyper	0.239757	-1.42682	hypo
BTC	4q13.3	0.000715535	-4.64007	hypo	0.667782	0.546792	hyper
NRARP	9q34.3	0.000715535	4.51381	hyper	0.000175371	5.24431	hyper
CTBP2	10q26.13	0.000715739	4.71442	hyper	0.000613214	-4.8086	hypo
GRK1	13q34	0.000715739	4.45063	hyper	0.0691926	-2.37871	hypo
C22orf9	22q13.31	0.000715739	4.5799	hyper	0.131948	1.92009	hyper
MBNL1	3q25.1	0.000719124	-4.66425	hypo	9.35881e-06	10.1445	hyper
PHEX	23p22.11	0.000719124	-4.53188	hypo	0.0404917	2.52106	hyper
LEFTY2	1q42.12	0.000719778	-4.63283	hypo	0.0079758	3.36507	hyper
LEO1	15q21.2	0.000719778	4.52156	hyper	6.69304e-05	-8.24499	hypo
GALNT14	2p23.1	0.000724349	-4.63032	hypo	0.0170645	-3.35522	hypo
TPBG	6q14.1	0.000726556	4.51846	hyper	0.000586372	-5.36532	hypo
BAG2	6p12.1	0.000726793	-4.58072	hypo	0.260695	1.37627	hyper
RGS2	1q31.2	0.000731354	-4.55625	hypo	6.51693e-08	10.4389	hyper
FAM55C	3q12.3	0.000731354	4.53886	hyper	0.0718686	2.39083	hyper
UGDH	4p14	0.000731354	4.56381	hyper	0.111797	-1.97487	hypo
KIF13A	6p22.3	0.000731354	4.58555	hyper	0.0535653	2.51422	hyper
FMO3	1q24.3	0.000736373	4.51893	hyper	0.00218577	-3.83185	hypo
PPAP2B	1p32.2	0.000736373	-4.58126	hypo	0.00558705	4.446	hyper
LRRC20	10q22.1	0.000736373	-4.43979	hypo	0.616554	0.638846	hyper
HS3ST1	4p15.33	0.000736408	-4.45639	hypo	0.000581799	5.16079	hyper
SHC3	9q22.1	0.000736408	-4.5385	hypo	0.0844278	2.26777	hyper
CYR61	1p22.3	0.000739223	-4.69144	hypo	0.00425228	3.62303	hyper
CD160	1q21.1	0.000739223	-4.66783	hypo	0.00253846	-4.12073	hypo
STK17B	2q32.3	0.000739223	-4.50524	hypo	0.767241	-0.38539	hypo
FRMPD1	9p13.2	0.000739223	-4.66296	hypo	0.276768	1.30945	hyper
EBI2	13q32.3	0.000739223	-4.66062	hypo	3.8352e-05	-5.64596	hypo
SPANXN4	23q27.3	0.000739223	-4.62506	hypo	0.00984194	-3.90197	hypo
DLEC1	3p22.2	0.000742574	-4.65379	hypo	0.69021	-0.507424	hypo
MPPED1	22q13.2	0.000742574	-4.64463	hypo	0.191112	-1.66018	hypo
KCNQ5	6q13	0.000748908	-4.68008	hypo	0.00375644	4.0082	hyper
MPZL2	11q23.3	0.000751954	-4.48602	hypo	3.65123e-07	13.3907	hyper
ZBTB22	6p21.32	0.000751954	4.61402	hyper	0.00750389	3.70873	hyper
GPHB5	14q23.2	0.000752498	4.48668	hyper	0.000741694	-6.26296	hypo
CCR10	17q21.31	0.000752647	-4.54959	hypo	0.804352	0.320845	hyper
EGFL6	23p22.2	0.000752647	4.56299	hyper	0.504648	0.835424	hyper
SAMD5	6q24.3	0.000757813	-4.45959	hypo	0.00010116	6.38867	hyper
FADS2	11q12.2	0.00075992	-4.58199	hypo	0.241092	-1.41953	hypo
SOX9	17q24.3	0.000760175	-4.55502	hypo	0.0112904	3.14476	hyper
PROK1	1p13.3	0.000761434	4.45595	hyper	0.00132194	-5.30037	hypo
CD82	11p11.2	0.000761434	-4.68892	hypo	0.981657	-0.0275996	hypo
MGC20983	19p13.2	0.000763562	-4.55729	hypo	0.0335539	-2.69667	hypo
PELI3	11q13.1	0.000768393	-4.46576	hypo	5.71121e-09	13.4532	hyper
KALRN	3q21.1	0.000768393	4.462	hyper	0.000526077	-5.2513	hypo
ARNT	1q21.2	0.000772619	4.53434	hyper	0.827563	-0.289629	hypo
BCAT1	12p12.1	0.000776794	-4.54243	hypo	0.558218	-0.743365	hypo
CDC42BPB	14q32.32	0.000780751	4.52745	hyper	0.802814	0.330043	hyper
ZNF532	18q21.32	0.00078449	-4.49359	hypo	1.05928e-07	12.9645	hyper
UCP1	4q31.21	0.000787603	-4.46378	hypo	1.45896e-05	6.52199	hyper
NCALD	8q22.3	0.000792215	-4.61648	hypo	4.98716e-12	16.8758	hyper
PAX5	9p13.2	0.000797173	-4.56075	hypo	0.577979	0.700478	hyper
KIAA0831	14q22.3	0.000797928	4.56021	hyper	0.37696	1.10007	hyper
TMEM158	3p21.31	0.000798498	-4.54315	hypo	0.000101059	5.53828	hyper
SLC9A11	1q25.1	0.000804101	4.43947	hyper	0.0772254	-2.1774	hypo
OR2S2	9p13.3	0.000804167	4.55085	hyper	7.4912e-10	-15.8944	hypo
LRRC28	15q26.3	0.000807177	4.41237	hyper	0.865057	0.222069	hyper
MYO6	6q14.1	0.000808594	4.44554	hyper	1.60254e-05	-6.44053	hypo
KIAA0256	15q21.1	0.000809766	-4.41842	hypo	0.000110465	6.84121	hyper
GBA	1q22	0.000812117	-4.43016	hypo	0.0765453	-2.11581	hypo
CXorf15	23p22.2	0.000815775	-4.46176	hypo	0.235755	-1.43334	hypo
XIRP2	2q24.3	0.000823062	4.39921	hyper	0.056235	-2.47327	hypo
FILIP1L	3q12.1	0.000823062	4.5294	hyper	0.0397713	2.71487	hyper
LAYN	11q23.1	0.000823062	-4.51688	hypo	1.09046e-05	8.33931	hyper
BCL9	1q21.1	0.000832983	4.45592	hyper	0.276814	-1.31902	hypo
PTPN22	1p13.2	0.000840574	-4.49089	hypo	0.000250294	-6.24965	hypo
SLC22A9	11q12.3	0.000843249	-4.62856	hypo	0.270137	1.3569	hyper
SLC45A1	1p36.23	0.000845426	4.40373	hyper	0.173682	-1.70146	hypo
TFAP2D	6p12.3	0.000845426	4.52273	hyper	0.0627304	2.35116	hyper
C13orf15	13q14.11	0.000850443	-4.43523	hypo	0.00509684	3.74177	hyper
C9orf75	9q34.3	0.000850443	4.50408	hyper	0.0247349	-3.06558	hypo
SPSB4	3q23	0.000853734	-4.54914	hypo	2.04569e-05	5.18778	hyper
SV2C	5q13.3	0.000853734	-4.45073	hypo	0.00337116	4.55512	hyper
GRIN2C	17q25.1	0.000853734	-4.5445	hypo	0.133713	-1.8713	hypo
GLRX	5q15	0.000856663	-4.54239	hypo	0.958877	-0.0680113	hypo
TBC1D24	16p13.3	0.00086031	4.3992	hyper	5.136e-05	-4.76063	hypo
HEXIM2	17q21.31	0.000860965	4.56336	hyper	0.845001	-0.259341	hypo
LZTFL1	3p21.31	0.000871731	4.50216	hyper	0.122847	-2.00458	hypo
HSD17B12	11p11.2	0.000875744	-4.47785	hypo	0.282982	1.3364	hyper
SLC19A2	1q24.2	0.000876242	4.42898	hyper	0.000135103	-5.32167	hypo
PRKCZ	1p36.33	0.000881484	4.40315	hyper	0.855036	-0.242227	hypo
C19orf59	19p13.2	0.000881775	-4.49696	hypo	5.7968e-06	6.5357	hyper
CHST1	11p11.2	0.000885303	-4.5381	hypo	0.0581017	2.35096	hyper
COLQ	3p24.3	0.000885597	-4.50198	hypo	0.00115706	5.08465	hyper
CXXC6	10q21.3	0.000885597	-4.53387	hypo	0.000657062	5.53401	hyper
ELOVL2	6p24.2	0.000893576	4.486	hyper	3.92051e-09	-11.3916	hypo
AKAP8L	19p13.12	0.000893576	4.50384	hyper	0.913721	0.143842	hyper
LTB4DH	9q31.3	0.00090855	4.43902	hyper	0.0725036	-2.2729	hypo
FAM5C	1q31.1	0.000910981	-4.45916	hypo	9.88863e-11	11.1484	hyper
PDGFRA	4q12	0.000910981	-4.50006	hypo	0.0261938	2.96005	hyper
MAFB	20q12	0.000911944	-4.34835	hypo	0.0190284	-2.80219	hypo
TACC2	10q26.13	0.000912311	-4.46685	hypo	0.384298	-1.07739	hypo
CD46	1q32.2	0.000921902	4.45421	hyper	7.78077e-10	10.1322	hyper
CAMK2D	4q26	0.000921902	-4.3615	hypo	0.149425	1.82608	hyper
CCDC80	3q13.2	0.000926581	4.4379	hyper	0.524757	0.796701	hyper
NPAS3	14q13.1	0.000929721	-4.46936	hypo	0.00375644	4.59999	hyper
OR10C1	6p22.1	0.000929721	4.38655	hyper	0.0589482	-2.53763	hypo
F2	11p11.2	0.000929721	4.46335	hyper	0.00858125	-3.89015	hypo
PLK1	16p12.1	0.000931527	-4.43734	hypo	0.827402	-0.288825	hypo
PTGER3	1p31.1	0.000934335	4.37962	hyper	0.0125222	-3.06538	hypo
LARP6	15q23	0.000934582	-4.4257	hypo	2.85102e-08	16.1637	hyper
FEM1B	15q23	0.000938078	4.47741	hyper	0.448542	0.941004	hyper
C6orf150	6q13	0.000945377	-4.39028	hypo	0.00813299	-3.98942	hypo
GPR88	1p21.2	0.000946077	-4.4297	hypo	0.0022132	4.42051	hyper
SLC16A1	1p13.2	0.000946238	-4.41565	hypo	4.97572e-07	8.39512	hyper
DBH	9q34.2	0.000946238	4.31253	hyper	0.000109499	-5.38112	hypo
HOXA11	7p15.2	0.000954883	-4.45112	hypo	0.960328	0.0655541	hyper
HSPA2	14q23.3	0.000955648	4.46384	hyper	3.90038e-05	-6.5267	hypo
DSC3	18q12.1	0.00096517	-4.61158	hypo	2.64466e-08	10.522	hyper
PLCH2	1p36.32	0.000966929	4.36876	hyper	0.268694	-1.3789	hypo
ZBTB1	14q23.3	0.000966929	-4.512	hypo	0.0528356	2.3481	hyper
PALM	19p13.3	0.000966929	4.41688	hyper	2.08119e-06	9.52389	hyper
SERTAD3	19q13.2	0.000975314	4.3398	hyper	0.355402	1.11428	hyper
SYDE2	1p22.3	0.000977584	4.43787	hyper	0.771596	-0.381847	hypo
SLC35D3	6q23.3	0.000979842	-4.39558	hypo	0.00813443	4.04539	hyper
OBFC2A	2q32.3	0.000988002	-4.52755	hypo	0.61433	-0.639609	hypo
MFSD1	3q25.33	0.00102109	-4.51887	hypo	0.154514	1.80954	hyper
NUMA1	11q13.4	0.00102957	4.41401	hyper	0.0575965	-2.41051	hypo
SLFN5	17q12	0.00103847	-4.36745	hypo	0.0390188	-2.85991	hypo
TMEM125	1p34.2	0.00105277	4.43211	hyper	0.431009	0.950266	hyper
CELSR2	1p13.3	0.00105277	4.32142	hyper	0.555041	-0.730457	hypo
FLJ45422	6p21.33	0.00105277	-4.32533	hypo	0.302729	1.25608	hyper
ODF4	17p13.1	0.00106127	-4.40556	hypo	0.0682477	-2.34436	hypo
CCDC56	17q21.31	0.00106286	4.3673	hyper	0.822356	0.299211	hyper
DOCK10	2q36.2	0.00106376	-4.44313	hypo	0.000881704	4.80558	hyper
SLC17A8	12q23.1	0.00106376	-4.47716	hypo	0.43263	0.946054	hyper
NDNL2	15q13.1	0.00106376	-4.34961	hypo	0.869736	-0.216524	hypo
C16orf5	16p13.3	0.00106376	-4.48604	hypo	7.55635e-07	10.6682	hyper
OR5AC2	3q11.2	0.00106832	4.31631	hyper	0.00160154	-5.18316	hypo
MEIS3	19q13.32	0.00108182	-4.45805	hypo	0.000987737	4.9127	hyper
LRMP	12p12.1	0.0010828	-4.53384	hypo	0.828176	-0.28201	hypo
BDNF	11p14.1	0.00108918	-4.46655	hypo	3.28371e-05	7.32715	hyper
FASTK	7q36.1	0.00108918	4.33166	hyper	0.0464991	2.5731	hyper
SH3MD4	2q13	0.00109285	4.40567	hyper	0.00111163	-5.11333	hypo
SCCPDH	1q44	0.00109428	4.40067	hyper	1.39596e-06	-8.34882	hypo
TNFSF9	19p13.3	0.00109428	-4.43211	hypo	0.00152182	4.71915	hyper
KLK10	19q13.33	0.00109428	-4.32248	hypo	0.00014273	5.70007	hyper
OR4L1	14q11.2	0.00109509	4.39584	hyper	0.143799	1.83829	hyper
NNAT	20q11.23	0.00109509	4.48801	hyper	0.0209351	2.82313	hyper
ZSWIM4	19p13.13	0.00110679	-4.42309	hypo	0.0115486	3.4643	hyper
S100A8	1q21.3	0.00111713	4.30566	hyper	3.98166e-05	-6.93811	hypo
ANKRD13A	12q24.11	0.00111917	-4.37073	hypo	0.0154504	2.97581	hyper
CHRNE	17p13.2	0.00112481	4.35468	hyper	0.0028298	-4.99008	hypo
KIF3B	20q11.21	0.00112481	4.42065	hyper	0.592073	-0.67496	hypo
ZNF319	16q13	0.00112722	-4.43444	hypo	0.0285687	2.99625	hyper
DLX2	2q31.1	0.0011335	-4.42725	hypo	0.0083888	3.14641	hyper
GDPD5	11q13.5	0.0011371	-4.48241	hypo	1.32364e-05	6.26812	hyper
PCDHB7	5q31.3	0.0011371	4.45537	hyper	0.000317667	5.0907	hyper
MIDN	19p13.3	0.00114527	4.40416	hyper	0.023099	3.05329	hyper
PVALB	22q12.3	0.00114595	-4.45112	hypo	6.90088e-05	-6.45246	hypo
ZIC2	13q32.3	0.0011573	-4.51074	hypo	0.00111818	4.53506	hyper
TANK	2q24.2	0.00115785	-4.44312	hypo	0.00217517	5.07976	hyper
CUL1	7q36.1	0.00115785	-4.40757	hypo	8.98266e-07	12.367	hyper
C10orf96	10q25.3	0.00115785	-4.42845	hypo	0.00302701	4.32791	hyper
STARD5	15q25.1	0.00115785	4.3	hyper	0.59173	0.677108	hyper
UTP18	17q21.33	0.00115986	-4.32568	hypo	0.00570397	-3.77208	hypo
ST8SIA1	12p12.1	0.00116185	-4.37914	hypo	0.963825	-0.0596515	hypo
KLF12	13q22.1	0.00116185	4.37304	hyper	0.00405908	4.04651	hyper
NPTXR	22q13.1	0.00116302	-4.47636	hypo	7.66739e-08	8.89687	hyper
FOXM1	12p13.33	0.00117388	-4.34547	hypo	6.73379e-05	-7.12893	hypo
VSX2	14q24.3	0.00117388	-4.39734	hypo	0.00044692	4.43055	hyper
CRAT	9q34.11	0.00118139	4.40371	hyper	0.0451739	-2.47065	hypo
FGD4	12p11.21	0.00118152	-4.36141	hypo	8.59349e-08	12.0547	hyper
XPO6	16p11.2	0.00119518	-4.26727	hypo	0.377115	1.08623	hyper
OR8S1	12q13.11	0.00119518	4.30555	hyper	0.0240975	-3.25295	hypo
NEUROG2	4q25	0.00119722	-4.30492	hypo	0.0818519	2.10807	hyper
WDR67	8q24.13	0.00119826	-4.36183	hypo	0.274541	1.3238	hyper
KCNMB1	5q35.1	0.00119826	4.22527	hyper	0.00133265	-4.83378	hypo
IRX1	5p15.33	0.00120144	-4.44014	hypo	6.32455e-06	5.69659	hyper
ISL2	15q24.3	0.00120144	-4.39167	hypo	5.90446e-08	8.68385	hyper
TOX	8q12.1	0.00120685	-4.39635	hypo	4.61499e-05	8.17369	hyper
IGF2BP1	17q21.32	0.00120685	-4.50537	hypo	0.000706858	5.07191	hyper
TSSC4	11p15.5	0.00120685	4.36829	hyper	0.352119	-1.15892	hypo
SEMA3B	3p21.31	0.00123798	4.30698	hyper	0.90262	0.161525	hyper
H2BFWT	23q22.2	0.00123798	4.25803	hyper	5.28822e-05	-6.53361	hypo
ACSL1	4q35.1	0.00124891	-4.37312	hypo	4.49901e-06	-6.87559	hypo
HCFC1	23q28	0.00124892	-4.29877	hypo	0.39821	1.01316	hyper
DKFZP586H2123	11p13	0.00125331	-4.38962	hypo	5.83132e-07	9.29541	hyper
CCDC88C	14q32.12	0.00125383	-4.33033	hypo	0.000273389	-4.55304	hypo
LOC401089	3q22.3	0.0012573	-4.40897	hypo	0.212926	-1.49541	hypo
GAPDH	12p13.31	0.0012573	-4.325	hypo	0.0222107	-3.02963	hypo
MTNR1A	4q35.2	0.0012602	4.20523	hyper	2.42865e-07	-7.79206	hypo
ZBTB40	1p36.12	0.00126104	4.3613	hyper	0.00407577	-4.54299	hypo
TMEM71	8q24.22	0.00126104	-4.22962	hypo	0.755857	0.405645	hyper
MGAT2	14q22.1	0.00126104	-4.30181	hypo	0.00249465	4.52636	hyper
EGFL8	6p21.32	0.00126104	4.2445	hyper	0.274532	1.36586	hyper
C1R	12p13.31	0.00126104	4.3492	hyper	0.93164	0.114595	hyper
CEBPG	19q13.11	0.00126436	-4.3462	hypo	0.770093	0.383602	hyper
WNT6	2q35	0.00126476	-4.42521	hypo	0.00176593	3.97707	hyper
AKR1C2	10p15.1	0.00129229	-4.38919	hypo	0.00121412	4.95937	hyper
RNF207	1p36.31	0.00129611	4.35034	hyper	0.504172	-0.827987	hypo
ARL3	10q24.32	0.00129611	4.34299	hyper	0.894734	0.173676	hyper
HLA-E	6p21.33	0.0013057	-4.34881	hypo	0.00321037	-4.09471	hypo
SH3PXD2B	5q35.1	0.00133485	-4.38795	hypo	4.36683e-20	17.7576	hyper
CHD5	1p36.31	0.00133814	-4.28993	hypo	0.321665	-1.19195	hypo
SCN2A	2q24.3	0.00134102	4.33289	hyper	0.414497	0.982399	hyper
GATS	7q22.1	0.00134517	4.25606	hyper	0.0376855	2.68787	hyper
C17orf64	17q23.2	0.0013515	-4.35909	hypo	6.91392e-10	13.2783	hyper
GPR98	5q14.3	0.00136047	4.38197	hyper	0.0176795	-3.33955	hypo
RPH3AL	17p13.3	0.00136081	4.32596	hyper	0.0315378	2.78929	hyper
SNED1	2q37.3	0.00136685	4.25362	hyper	0.0849637	-2.21123	hypo
ORAI2	7q22.1	0.00136685	-4.26359	hypo	0.354576	-1.11476	hypo
ICMT	1p36.31	0.00139135	4.22793	hyper	0.647965	0.581513	hyper
ARFGAP1	20q13.33	0.0013992	4.27745	hyper	0.292437	1.24884	hyper
PLXNC1	12q22	0.00140387	-4.27752	hypo	0.0521037	2.4536	hyper
MPP6	7p15.3	0.00140618	-4.30937	hypo	2.89083e-07	8.38408	hyper
SH2B1	16p11.2	0.00141005	4.33302	hyper	0.00667518	4.07132	hyper
FUT8	14q23.3	0.00141209	4.32007	hyper	0.853294	0.241099	hyper
BTBD11	12q23.3	0.00141461	-4.26346	hypo	0.0181303	3.3525	hyper
TSPAN8	12q21.1	0.00141606	4.23599	hyper	0.000166983	-5.93828	hypo
SNCAIP	5q23.2	0.00142543	-4.18557	hypo	2.57255e-14	12.5888	hyper
GPRASP2	23q22.1	0.00142543	-4.2686	hypo	0.000731368	5.30242	hyper
FAM44B	5q35.2	0.00143555	4.19445	hyper	0.847705	-0.249678	hypo
RAB27A	15q21.3	0.00143663	-4.26923	hypo	0.140567	-1.83168	hypo
PECI	6p25.2	0.00143663	4.29126	hyper	0.0138962	-3.07426	hypo
CSRP2	12q21.2	0.00143861	-4.22209	hypo	2.02204e-08	9.88701	hyper
KCNQ3	8q24.22	0.00143892	-4.28255	hypo	0.000492529	4.90917	hyper
HOMER3	19p13.11	0.00145582	-4.31428	hypo	3.42156e-05	7.04108	hyper
OR2H1	6p22.1	0.00145582	4.22198	hyper	0.38019	-1.05832	hypo
H6PD	1p36.22	0.00145592	-4.41076	hypo	4.90822e-06	9.36782	hyper
KIAA1219	20q11.23	0.00145893	4.24949	hyper	0.0187868	3.23447	hyper
GIT1	17q11.2	0.00146086	-4.32578	hypo	1.28783e-06	10.4807	hyper
AKR7A3	1p36.13	0.00146242	4.30092	hyper	0.00360425	-4.24873	hypo
BHLHB5	8q12.3	0.00146312	-4.16582	hypo	0.925814	0.121355	hyper
GHRHR	7p15.1	0.00147471	4.19132	hyper	8.00421e-06	-7.66224	hypo
OR7A10	19p13.12	0.00147806	4.26684	hyper	5.75289e-06	-5.92863	hypo
MRPS23	17q22	0.0014898	4.24208	hyper	0.000110465	-6.14398	hypo
BCAS1	20q13.2	0.0014898	4.26708	hyper	1.87159e-15	-14.6324	hypo
WDR1	4p16.1	0.00149093	-4.26404	hypo	0.00225401	4.31397	hyper
C3orf15	3q13.33	0.00149673	4.26162	hyper	0.372254	1.07502	hyper
ACADSB	10q26.13	0.00150319	4.17607	hyper	1.32433e-06	-7.8312	hypo
KCNJ16	17q24.3	0.00150613	4.20757	hyper	1.80796e-06	-5.70473	hypo
CPNE8	12q12	0.00152023	-4.26029	hypo	0.00121607	4.26058	hyper
RNASE12	14q11.2	0.00152023	4.20345	hyper	0.000699565	-5.948	hypo
SIGLEC15	18q12.3	0.00152143	-4.2565	hypo	0.491712	0.850303	hyper
MED30	8q24.11	0.00152306	4.24789	hyper	1.74104e-07	-8.93384	hypo
PDILT	16p12.3	0.00155052	-4.31897	hypo	3.04337e-09	-9.07737	hypo
KARS	16q23.1	0.00155052	-4.15775	hypo	0.00243528	-3.84472	hypo
ARHGAP17	16p12.1	0.00156991	-4.32605	hypo	0.788836	-0.355376	hypo
MAB21L1	13q13.3	0.00157325	-4.24068	hypo	0.187861	1.62609	hyper
ZCCHC11	1p32.3	0.00158135	-4.22578	hypo	3.81303e-05	8.33014	hyper
FFAR2	19q13.12	0.00158135	-4.25315	hypo	0.00690724	-3.95731	hypo
PRKX	23p22.33	0.00158643	-4.20857	hypo	9.69399e-07	8.55621	hyper
STXBP2	19p13.2	0.0015865	4.19035	hyper	0.0186779	-3.25422	hypo
IGFBP5	2q35	0.00159491	-4.16614	hypo	1.28468e-11	10.7403	hyper
C1orf34	1p32.3	0.00161248	4.28861	hyper	0.000469021	-5.10295	hypo
KAAG1	6p22.2	0.00161248	4.1929	hyper	0.20879	1.54614	hyper
C12orf30	12q24.13	0.00161659	-4.23874	hypo	0.00286273	4.81197	hyper
TARS2	1q21.2	0.00162589	4.23221	hyper	0.00175133	-5.51992	hypo
HIST1H2AB	6p22.1	0.00162875	-4.24071	hypo	9.28491e-09	8.57314	hyper
EN1	2q14.2	0.00164326	-4.2604	hypo	0.924084	-0.126726	hypo
TF	3q22.1	0.00165189	-4.28178	hypo	2.49902e-06	7.81655	hyper
DOPEY2	21q22.12	0.00165189	4.22825	hyper	0.00266267	-4.86202	hypo
OR4N2	14q11.2	0.00166642	4.2071	hyper	0.00468553	-3.63846	hypo
NOD2	16q12.1	0.00166912	-4.26458	hypo	4.76192e-05	5.82088	hyper
GAS7	17p13.1	0.00166912	4.13859	hyper	1.90063e-05	-4.99508	hypo
CDC37	19p13.2	0.00167067	-4.21517	hypo	0.0020776	-4.74115	hypo
ATP6V1B2	8p21.3	0.00168733	-4.15225	hypo	0.24449	-1.40165	hypo
ARL9	4q12	0.00169758	-4.29762	hypo	0.052836	2.45896	hyper
PKP1	1q32.1	0.00169905	4.25324	hyper	9.78726e-06	-6.80314	hypo
MGC3207	19p13.13	0.00172401	4.2261	hyper	4.02204e-09	7.62127	hyper
SETMAR	3p26.2	0.00173221	4.25913	hyper	0.000749801	4.40727	hyper
RNF145	5q33.3	0.00173221	-4.25596	hypo	6.59388e-09	9.69113	hyper
CLDN4	7q11.23	0.00173221	4.20062	hyper	2.8642e-05	-6.79074	hypo
CLEC12B	12p13.2	0.00173221	4.20685	hyper	0.0042147	-3.76991	hypo
SAMD13	1p31.1	0.00173283	4.29776	hyper	9.4194e-10	11.7523	hyper
AQP12B	2q37.3	0.00173283	4.13895	hyper	0.0591199	-2.40828	hypo
P53AIP1	11q24.3	0.00173283	4.19711	hyper	0.00611475	3.87802	hyper
NUBPL	14q12	0.00173283	4.17283	hyper	0.0632712	-2.44765	hypo
C17orf74	17p13.1	0.00173283	4.16028	hyper	0.00459003	-4.5433	hypo
HDAC11	3p25.1	0.00173427	4.12904	hyper	0.207791	-1.56278	hypo
TRIM7	5q35.3	0.00173489	-4.29889	hypo	0.792381	-0.342015	hypo
SYT17	16p12.3	0.00173777	-4.20919	hypo	0.0653324	-2.3392	hypo
C9orf95	9q21.13	0.00174055	4.19034	hyper	0.00075146	4.45091	hyper
MSN	23q11.1	0.00174092	-4.20269	hypo	0.141262	-1.7414	hypo
TUBG2	17q21.31	0.00175033	4.20506	hyper	0.0508764	2.24022	hyper
PCAF	3p24.3	0.00177556	4.22227	hyper	0.00987001	3.40648	hyper
SLMO2	20q13.32	0.00177758	-4.22416	hypo	0.738026	-0.428934	hypo
PTPN18	2q21.1	0.00178562	4.13914	hyper	0.463636	-0.918713	hypo
LOC130355	2q14.2	0.00178885	4.25603	hyper	0.0901891	2.18528	hyper
CSTA	3q21.1	0.00178885	-4.21525	hypo	0.000512268	5.10167	hyper
MTA3	2p21	0.001789	4.1825	hyper	0.0330088	-2.57504	hypo
EIF4E3	3p13	0.00179653	-4.20871	hypo	0.143719	1.87947	hyper
FSCB	14q21.3	0.0018028	-4.2751	hypo	0.955367	-0.074703	hypo
DSC2	18q12.1	0.0018028	-4.21278	hypo	0.115938	1.99265	hyper
SLC5A12	11p14.2	0.0018028	4.20133	hyper	3.33518e-10	-10.2605	hypo
C5orf4	5q33.2	0.00181112	-4.20983	hypo	1.61417e-10	15.8156	hyper
UBE2H	7q32.2	0.00181796	4.21483	hyper	0.370098	-1.10219	hypo
SH3PXD2A	10q24.33	0.00182395	-4.18805	hypo	4.76112e-07	8.49149	hyper
TBX2	17q23.2	0.00182395	-4.20372	hypo	3.66585e-06	7.50909	hyper
CSNK1A1L	13q13.3	0.00182395	4.08185	hyper	0.114661	-1.84938	hypo
MGAT3	22q13.1	0.00182586	4.12052	hyper	0.487556	-0.855645	hypo
C1orf78	1p34.3	0.00182888	4.23468	hyper	0.0195549	2.80315	hyper
GPR160	3q26.2	0.00182888	4.18102	hyper	0.000613214	-5.8923	hypo
LRRC15	3q29	0.00183341	4.14703	hyper	6.26755e-05	-7.46559	hypo
PRTFDC1	10p12.1	0.00183341	-4.32482	hypo	0.0243969	2.78516	hyper
SPDEF	6p21.31	0.00183478	4.19152	hyper	0.00399546	-4.46004	hypo
MFAP4	17p11.2	0.00186166	-4.19323	hypo	1.85234e-06	9.59058	hyper
PPM1L	3q26.1	0.00186454	-4.2745	hypo	0.310213	1.22451	hyper
MS4A1	11q12.2	0.00186454	-4.15661	hypo	1.0599e-06	9.48622	hyper
RASSF3	12q14.2	0.0018897	-4.16186	hypo	0.00155108	-4.93264	hypo
FLJ34931	2p23.2	0.00190501	4.14262	hyper	0.53125	-0.783566	hypo
MYD88	3p22.2	0.00190875	-4.21129	hypo	0.000771361	-4.67934	hypo
KIAA0323	14q12	0.00191019	4.10146	hyper	0.294591	-1.27799	hypo
FOXQ1	6p25.3	0.00192668	-4.19847	hypo	0.0107312	3.25105	hyper
PPP2R2B	5q32	0.00192709	-4.30058	hypo	0.212483	-1.53984	hypo
IRF7	11p15.5	0.00192821	4.20069	hyper	0.000233855	-6.37334	hypo
SAMD14	17q21.33	0.0019373	-4.22748	hypo	2.81403e-05	6.00059	hyper
MAP1LC3A	20q11.22	0.00193982	4.21827	hyper	0.0159122	3.10528	hyper
LUZP4	23q23	0.00194315	4.07917	hyper	0.0105348	-2.96452	hypo
CRLF1	19p13.11	0.00194366	-4.26633	hypo	0.0123047	2.88885	hyper
SLC26A11	17q25.3	0.00194366	4.12714	hyper	0.600945	0.661696	hyper
HIVEP2	6q24.2	0.00194367	-4.09064	hypo	0.00455476	3.93459	hyper
PXMP4	20q11.22	0.00194553	4.19047	hyper	0.0326268	-2.8179	hypo
BLVRA	7p13	0.00194653	4.18073	hyper	0.374306	-1.09016	hypo
ANKS4B	16p12.2	0.00194653	4.17375	hyper	0.606237	-0.630983	hypo
SIRPA	20p13	0.00194658	-4.22697	hypo	4.5139e-07	12.0615	hyper
PREX1	20q13.13	0.00196318	4.1546	hyper	0.00672823	-4.09727	hypo
CCR8	3p22.1	0.00196611	-4.13504	hypo	0.0689392	-2.3785	hypo
MYO7B	2q14.3	0.00197038	4.10382	hyper	0.00116244	-4.84464	hypo
SLC12A2	5q23.3	0.00197397	4.17006	hyper	0.0244835	2.78598	hyper
PH-4	3p21.31	0.00198881	4.21769	hyper	0.00231347	-3.56629	hypo
AMDHD2	16p13.3	0.00198885	4.17649	hyper	0.367646	-1.12888	hypo
GABBR2	9q22.33	0.00198971	-4.08187	hypo	0.0020302	3.7294	hyper
ERP29	12q24.13	0.0019931	-4.15378	hypo	1.20202e-07	-6.96339	hypo
TLE6	19p13.3	0.0019931	4.18622	hyper	0.857774	0.236345	hyper
NR2F1	5q15	0.00201347	-4.08534	hypo	0.199417	1.564	hyper
RHBDD1	2q36.3	0.00201362	-4.11234	hypo	8.82091e-07	-9.58891	hypo
ARHGAP28	18p11.31	0.00201997	4.1486	hyper	6.36158e-06	-9.60372	hypo
PDRG1	20q11.21	0.00201997	4.11666	hyper	0.303778	1.27037	hyper
CRIP1	14q32.33	0.00203531	4.20083	hyper	0.00337116	-3.85929	hypo
ACOX3	4p16.1	0.00204807	4.10106	hyper	0.497606	0.824785	hyper
LHX4	1q25.2	0.00205513	-4.1503	hypo	0.00640922	3.74441	hyper
RNASE6	14q11.2	0.00205513	-4.16499	hypo	0.000396309	4.59542	hyper
C1orf83	1p32.3	0.00206721	-4.08413	hypo	0.758225	0.397782	hyper
IHH	2q35	0.00206721	-4.13442	hypo	0.727248	-0.439517	hypo
PTMS	12p13.31	0.00206721	4.12086	hyper	0.0112994	3.3801	hyper
LAMB1	7q31.1	0.00207132	-4.15249	hypo	0.248092	1.39685	hyper
HM13	20q11.21	0.00207132	-4.07888	hypo	0.0789623	-2.34136	hypo
CCND3	6p21.1	0.00207263	-4.21904	hypo	0.0961966	1.95527	hyper
ADAMTS15	11q24.3	0.00207263	4.13524	hyper	0.00866536	-3.25384	hypo
SLC22A3	6q25.3	0.00207765	4.15927	hyper	0.0126258	-3.44298	hypo
APPL1	3p14.3	0.00210159	4.19076	hyper	0.140308	1.86547	hyper
OVOL1	11q13.1	0.00210642	4.18122	hyper	3.67677e-07	-9.08111	hypo
RPS6KA5	14q32.12	0.00210642	4.12503	hyper	0.00243528	4.05454	hyper
KRT6A	12q13.13	0.00210965	4.05376	hyper	0.55597	-0.73445	hypo
NAT12	14q23.1	0.00212646	4.12905	hyper	1.9071e-06	8.82885	hyper
C1QB	1p36.12	0.00213062	-4.16497	hypo	0.000167401	-5.7059	hypo
ATP5D	19p13.3	0.00213426	4.16016	hyper	0.476953	0.891153	hyper
JAK1	1p31.3	0.00214006	-4.02131	hypo	0.0004372	-5.22341	hypo
TCF19	6p21.33	0.00214637	-4.08032	hypo	0.844994	0.261032	hyper
RBM16	6q25.2	0.00214637	4.13502	hyper	0.984066	0.023562	hyper
C3orf65	3q27.2	0.00215388	4.03945	hyper	0.797056	-0.33281	hypo
ZNF553	16p11.2	0.00215388	4.15622	hyper	0.88438	-0.188561	hypo
HPDL	1p34.1	0.00215771	-4.10777	hypo	0.537485	-0.773277	hypo
SMOC2	6q27	0.00215771	-4.12145	hypo	0.0168558	2.98512	hyper
NCAM1	11q23.1	0.00215771	-4.14744	hypo	0.000395257	-5.89274	hypo
CPEB4	5q35.2	0.00215771	4.13344	hyper	0.00226583	3.90979	hyper
P4HA1	10q22.1	0.00215771	4.14734	hyper	0.885438	-0.189887	hypo
OR4N4	15q11.2	0.00215771	4.07056	hyper	5.32722e-06	-5.98378	hypo
PLA2G6	22q13.1	0.00215771	4.17054	hyper	1.39434e-06	-10.3019	hypo
APEX1	14q11.2	0.00218326	-4.14885	hypo	7.48175e-06	8.51553	hyper
RTN4RL1	17p13.3	0.0021919	4.08969	hyper	0.0450512	-2.5641	hypo
AMY2A	1p21.1	0.00219594	4.02129	hyper	0.116252	-2.06042	hypo
FAM83C	20q11.22	0.00219751	4.16163	hyper	0.0303683	-3.03847	hypo
CRYBB2	22q11.23	0.00220662	-4.16395	hypo	0.303413	1.28315	hyper
CLK4	5q35.3	0.00220682	-4.10575	hypo	6.63346e-08	11.8454	hyper
MAZ	16p11.2	0.00220682	4.06911	hyper	1.87017e-08	-8.6124	hypo
LIFR	5p13.1	0.00220725	-4.14303	hypo	0.12526	1.98277	hyper
SP8	7p15.3	0.00221339	-4.15041	hypo	7.80912e-06	8.047	hyper
C16orf3	16q24.3	0.00221339	4.04514	hyper	0.396222	1.05717	hyper
FN3KRP	17q25.3	0.00221339	4.17354	hyper	0.0362352	-2.82678	hypo
HNMT	2q22.1	0.00223172	4.11284	hyper	0.0827316	2.24319	hyper
ARHGEF16	1p36.32	0.00223853	4.08098	hyper	0.762411	0.397693	hyper
TINAGL1	1p35.2	0.00223853	-4.1057	hypo	2.86219e-05	6.95433	hyper
GSTA4	6p12.1	0.00223853	-4.13284	hypo	1.2689e-05	10.105	hyper
MMP28	17q12	0.00223853	-4.12565	hypo	0.252955	-1.41467	hypo
NUP188	9q34.11	0.00224149	4.04542	hyper	0.915715	-0.140293	hypo
MUM1L1	23q22.3	0.00224523	-4.14061	hypo	0.727256	0.444748	hyper
TMEM31	23q22.2	0.00225274	-4.14529	hypo	0.0871803	2.13761	hyper
BATF3	1q32.3	0.0022561	4.18748	hyper	0.0233978	3.04659	hyper
LIPG	18q21.1	0.0022561	-4.13682	hypo	3.98965e-08	8.71697	hyper
TMPRSS5	11q23.2	0.0022568	-4.18436	hypo	0.00452272	3.96403	hyper
MEIS1	2p14	0.00226338	-4.14873	hypo	3.30531e-05	5.85896	hyper
NTRK3	15q25.3	0.00227576	-4.10521	hypo	0.123734	1.7753	hyper
CYB5A	18q22.3	0.00227972	4.08258	hyper	0.00094349	-4.33694	hypo
MARK1	1q41	0.0022847	-4.11788	hypo	1.28783e-06	9.59226	hyper
SERINC4	15q15.3	0.0022847	4.05315	hyper	0.000771826	4.77633	hyper
TPCN1	12q24.13	0.00228826	4.0989	hyper	0.00101052	-5.22067	hypo
LYSMD1	1q21.2	0.00230579	4.05274	hyper	9.92041e-09	8.02467	hyper
GIGYF1	7q22.1	0.00230676	3.99888	hyper	0.00194922	4.9645	hyper
SMPDL3B	1p35.3	0.00230955	4.05876	hyper	0.0397565	-2.79562	hypo
CCNA1	13q13.3	0.00231075	-4.03861	hypo	0.000498856	-5.05141	hypo
DNAJC6	1p31.3	0.00231719	-4.1123	hypo	3.02997e-05	8.11812	hyper
RPL22L1	3q26.2	0.00232084	-4.11134	hypo	0.0878384	-2.16126	hypo
C16orf84	16q24.3	0.00232207	4.04368	hyper	0.171262	1.74644	hyper
GNG5	1p22.3	0.00232233	3.98909	hyper	0.0080877	-3.78606	hypo
KLK2	19q13.33	0.00232301	4.11231	hyper	0.00128025	-5.19938	hypo
RAB32	6q24.3	0.00232557	-4.10748	hypo	0.00215332	4.76733	hyper
CXXC1	18q21.1	0.00233379	4.12291	hyper	0.988816	-0.0158515	hypo
RFTN1	3p24.3	0.00235742	-4.1578	hypo	0.199417	-1.53469	hypo
WDR32	9p13.2	0.00235742	4.03906	hyper	0.211059	1.56356	hyper
KCNC4	1p13.3	0.00239699	-4.14466	hypo	1.88074e-06	9.03338	hyper
TCEA3	1p36.12	0.00241701	4.12315	hyper	0.206764	1.55677	hyper
CEP97	3q12.3	0.00241701	-4.03721	hypo	0.805076	-0.324889	hypo
BANK1	4q24	0.00241701	-3.99362	hypo	0.471978	-0.89421	hypo
SULF1	8q13.2	0.00241701	-4.17268	hypo	0.193714	1.51869	hyper
CD8A	2p11.2	0.00241784	-4.16442	hypo	0.00286715	4.30273	hyper
MS4A5	11q12.2	0.00242212	-4.10356	hypo	0.00096462	5.02839	hyper
EIF3E	8q23.1	0.00245801	-4.00692	hypo	0.00826523	3.15449	hyper
OR5AK2	11q12.1	0.00247511	3.99341	hyper	0.186765	-1.63345	hypo
COLEC10	8q24.12	0.00250077	-4.06932	hypo	0.0931884	2.14546	hyper
PLEKHH2	2p21	0.00250233	-4.02473	hypo	6.98486e-09	9.33546	hyper
NPVF	7p15.2	0.00251301	4.02972	hyper	0.000689191	-4.42143	hypo
GLIPR1	12q21.2	0.00251806	-4.12175	hypo	0.00153086	4.73607	hyper
EEF1A1	6q13	0.00253973	-4.00998	hypo	0.0187785	2.88733	hyper
IL8RB	2q35	0.00254266	-4.07387	hypo	0.260695	-1.39668	hypo
FAM101A	12q24.31	0.00254942	3.94519	hyper	0.660886	-0.554425	hypo
FNDC3B	3q26.31	0.00255819	-4.14069	hypo	1.87017e-08	11.0394	hyper
ACOX1	17q25.1	0.00256628	-4.0932	hypo	0.959724	0.0671263	hyper
COL9A2	1p34.2	0.00258598	-3.98296	hypo	7.60712e-06	8.02437	hyper
NPAS1	19q13.32	0.00258598	-3.97047	hypo	0.876938	-0.200244	hypo
PRDM13	6q16.3	0.00258598	4.03103	hyper	4.60385e-06	7.84925	hyper
CYP2A13	19q13.2	0.00262339	-4.14762	hypo	3.69888e-05	5.91995	hyper
C13orf18	13q14.12	0.00262454	-4.08845	hypo	8.7547e-07	9.79248	hyper
LNX1	4q12	0.00262522	-4.0201	hypo	0.179358	1.71297	hyper
B3GALNT2	1q42.3	0.00262596	4.10236	hyper	0.843204	0.25919	hyper
NHEDC1	4q24	0.00262596	4.00747	hyper	0.584624	-0.693035	hypo
CCNJ	10q23.33	0.00263007	-4.10269	hypo	0.00580736	4.20661	hyper
SAC	1q24.2	0.00265098	3.93455	hyper	0.386804	1.06544	hyper
GALC	14q31.3	0.00265098	-3.99969	hypo	0.0012985	4.83192	hyper
TUBB2C	9q34.3	0.00265098	3.98412	hyper	7.54142e-05	-6.80389	hypo
ABI1	10p12.1	0.00266009	4.06703	hyper	4.71456e-05	6.8039	hyper
MDH1	2p15	0.00267453	-3.95937	hypo	0.094542	2.02022	hyper
PIP4K2A	10p12.2	0.00267453	4.0427	hyper	0.122775	1.96826	hyper
ZNF131	5p12	0.00267498	-3.94234	hypo	0.274413	1.37752	hyper
RBM47	4p14	0.0026787	3.98409	hyper	0.00115104	-4.56326	hypo
CYP26B1	2p13.3	0.0026787	-4.01562	hypo	0.00667456	4.07665	hyper
KLRG2	7q34	0.0026787	-4.02987	hypo	0.0267604	-2.85378	hypo
CYYR1	21q21.3	0.0026787	-4.08819	hypo	6.21441e-05	6.99733	hyper
KIAA1598	10q25.3	0.0026787	4.05331	hyper	4.93535e-08	-12.7528	hypo
LY96	8q21.11	0.00268449	-4.0677	hypo	0.102088	2.11951	hyper
PNMA2	8p21.2	0.0026854	-3.99348	hypo	0.92826	-0.120547	hypo
SH3TC2	5q33.1	0.00268865	-3.96922	hypo	0.0572079	2.51565	hyper
GOLGA1	9q33.3	0.00268865	3.99796	hyper	0.00212623	-4.14078	hypo
TMC5	16p12.3	0.00269502	-4.04041	hypo	0.0198126	-3.32953	hypo
ST18	8q11.23	0.00270027	3.97599	hyper	1.03119e-08	-7.66822	hypo
IL17RD	3p14.3	0.00271587	-3.98177	hypo	0.0658157	2.2857	hyper
SNRPN	15q11.2	0.00278182	3.97038	hyper	0.00254119	-4.53907	hypo
C1orf80	1q41	0.00278195	3.98716	hyper	0.0620482	2.49895	hyper
SIX2	2p21	0.00278195	-4.03297	hypo	0.635763	0.586322	hyper
RASSF1	3p21.31	0.00278195	-3.99778	hypo	0.804352	-0.323972	hypo
DSTN	20p12.1	0.00278195	3.99734	hyper	1.28783e-06	7.6049	hyper
SLC16A10	6q21	0.00279425	-4.0825	hypo	0.00229317	4.05087	hyper
HAPLN2	1q23.1	0.00279627	-3.99436	hypo	0.00188624	-4.92586	hypo
KCNH4	17q21.2	0.00279627	-4.01134	hypo	7.19461e-06	5.90992	hyper
SRPK2	7q22.2	0.00279627	3.98734	hyper	0.000721557	5.79789	hyper
SCNN1D	1p36.33	0.00279799	3.96801	hyper	0.922518	-0.131073	hypo
TACC3	4p16.3	0.00280557	-4.06542	hypo	4.0748e-05	-5.34496	hypo
PLEKHF1	19q12	0.00280769	-4.04191	hypo	0.000508405	5.49937	hyper
RNF150	4q31.21	0.00281089	-4.01224	hypo	0.000132753	6.78973	hyper
SEC23IP	10q26.11	0.00281089	3.97153	hyper	0.0233327	-3.069	hypo
ZNF764	16p11.2	0.00281089	4.03597	hyper	0.845963	-0.255927	hypo
PTGER2	14q22.1	0.00281383	-3.9635	hypo	0.000307112	5.52958	hyper
CHSY3	5q23.3	0.002827	-3.99882	hypo	7.04697e-09	11.125	hyper
OR4D2	17q22	0.00282875	3.96473	hyper	1.40744e-12	-10.678	hypo
LOC401052	3p25.3	0.00284383	3.99879	hyper	0.200088	1.52632	hyper
PDCD5	19q13.11	0.00284383	-3.95841	hypo	0.471781	0.888453	hyper
KIF12	9q32	0.00284383	3.93621	hyper	0.723153	-0.454256	hypo
SLA2	20q11.23	0.00285076	-4.00717	hypo	0.524359	0.794678	hyper
HJURP	2q37.1	0.00285576	-4.03745	hypo	0.00196234	-5.07844	hypo
KIAA1244	6q23.3	0.00285576	4.05768	hyper	3.66523e-06	-7.47742	hypo
XKR9	8q13.3	0.00285654	4.01525	hyper	0.34803	-1.18574	hypo
C19orf29	19p13.3	0.00285654	4.01692	hyper	0.790412	0.346805	hyper
PAPPA	9q33.1	0.0028567	-3.96068	hypo	8.13657e-09	10.9246	hyper
EDG1	1p21.2	0.00285849	-4.06474	hypo	7.95406e-12	13.4173	hyper
MYF5	12q21.31	0.00287548	-4.08022	hypo	0.630245	-0.595555	hypo
PRDM11	11p11.2	0.00289009	-4.03799	hypo	7.63311e-11	10.0732	hyper
RAB6IP1	11p15.4	0.00289203	-4.04367	hypo	0.632805	-0.602537	hypo
TIMM10	11q12.1	0.00289203	-3.90836	hypo	0.0061703	-4.04883	hypo
HSD17B1	17q21.31	0.00289203	3.95063	hyper	0.804868	-0.32693	hypo
SEPT10	2q13	0.00289989	3.98077	hyper	0.03264	2.76926	hyper
PLA2G12A	4q25	0.00289989	4.00798	hyper	0.463853	-0.884774	hypo
COL16A1	1p35.2	0.00289989	-3.99153	hypo	0.00609946	4.18142	hyper
APBA2	15q13.1	0.0029017	3.98778	hyper	0.000115459	-5.28765	hypo
FKBP1A	20p13	0.00290276	-4.03287	hypo	4.63618e-06	10.4877	hyper
FAM63A	1q21.2	0.00290848	3.95254	hyper	0.712969	-0.469065	hypo
NAT10	11p13	0.00291171	-3.93999	hypo	0.087774	-2.18115	hypo
FAM126B	2q33.1	0.00292975	-3.94	hypo	0.864751	-0.225595	hypo
WRNIP1	6p25.2	0.00293565	-4.00677	hypo	0.00231347	4.31314	hyper
MANBAL	20q11.23	0.00295464	-4.03394	hypo	0.00405908	3.63242	hyper
SPSB3	16p13.3	0.00295464	3.94472	hyper	0.901399	-0.162205	hypo
CAV2	7q31.2	0.00295817	-4.061	hypo	0.211059	1.61254	hyper
KIAA1609	16q24.1	0.00296931	-4.03445	hypo	0.0591199	-2.38722	hypo
SLC22A23	6p25.2	0.00297761	4.0317	hyper	0.874908	-0.203506	hypo
HIF3A	19q13.32	0.00297761	-3.92436	hypo	4.45986e-05	7.61013	hyper
SNAPC1	14q23.2	0.002995	-3.90753	hypo	0.000621914	5.5656	hyper
PTN	7q33	0.00300455	3.9944	hyper	0.00174194	-3.80057	hypo
SLC7A8	14q11.2	0.00300622	4.0628	hyper	0.0397713	-2.74257	hypo
PCDH11X	23q21.31	0.00303233	-3.9201	hypo	9.24971e-05	6.31366	hyper
VAMP1	12p13.31	0.00303233	4.0348	hyper	2.91471e-05	-7.7217	hypo
SLC7A13	8q21.3	0.00304842	-4.05611	hypo	0.924084	0.126922	hyper
C3orf58	3q24	0.00305116	-3.98182	hypo	2.2101e-09	10.2892	hyper
TLX3	5q35.1	0.00306006	-3.92946	hypo	4.36368e-06	8.97955	hyper
RPS3A	4q31.3	0.00306016	-3.95158	hypo	0.0198661	3.36429	hyper
SLC29A2	11q13.1	0.00306278	3.97391	hyper	0.0635806	2.40461	hyper
MYL6	12q13.2	0.00306339	-3.91578	hypo	2.50327e-09	7.90964	hyper
LOC283129	11q13.1	0.00306339	4.01548	hyper	0.000170744	-6.57022	hypo
SLC6A20	3p21.31	0.0030713	-3.992	hypo	0.0140978	3.61959	hyper
TRIM50	7q11.23	0.00307746	3.92518	hyper	0.396887	-1.04473	hypo
SNX1	15q22.31	0.00308623	4.01497	hyper	0.0146392	3.51496	hyper
TNFSF13B	13q33.3	0.00308889	-3.93959	hypo	0.0537075	-2.4315	hypo
LOC55908	19p13.2	0.00308889	3.91228	hyper	0.608414	0.647277	hyper
C20orf111	20q13.12	0.00310184	3.96702	hyper	0.000620184	-4.65793	hypo
IL24	1q32.1	0.00311552	3.90636	hyper	0.0567019	2.35294	hyper
TRPC3	4q27	0.0031166	4.00393	hyper	1.53489e-05	-7.36648	hypo
TOX2	20q13.12	0.0031166	-3.99101	hypo	0.103219	2.07165	hyper
EGR4	2p13.2	0.00312356	-3.96892	hypo	0.102296	2.06101	hyper
KIAA0372	5q15	0.0031365	3.95475	hyper	0.157721	-1.84238	hypo
LOC150786	2q21.1	0.00314056	3.93556	hyper	0.00249765	-4.94282	hypo
SOSTDC1	7p21.1	0.00316535	-3.98253	hypo	1.61417e-10	15.0921	hyper
ATP11B	3q26.33	0.00317818	-3.96947	hypo	0.000717341	5.35496	hyper
TIGD2	4q22.1	0.00317818	-4.01706	hypo	0.260857	1.36557	hyper
VPS37B	12q24.31	0.00317818	-4.00791	hypo	4.40598e-09	13.0735	hyper
MAG	19q13.12	0.00317818	-3.89572	hypo	0.0177939	3.36463	hyper
MGC24039	12p11.21	0.00317818	4.01193	hyper	3.07796e-05	5.88409	hyper
KATNAL2	18q21.1	0.00317818	4.12668	hyper	0.88438	0.18713	hyper
KCNN1	19p13.11	0.00318597	-4.05475	hypo	0.0211947	-2.98095	hypo
PTH2	19q13.33	0.00318597	-3.95298	hypo	3.38873e-07	6.48113	hyper
ASAH1	8p22	0.00318597	3.9769	hyper	0.936006	0.107846	hyper
OR2T10	1q44	0.00320384	3.93029	hyper	2.10327e-08	-9.88773	hypo
ATP13A2	1p36.13	0.00320384	-4.02865	hypo	0.660886	0.547577	hyper
KIAA1191	5q35.2	0.00320384	-3.95543	hypo	0.00201732	-4.37516	hypo
NYD-SP21	11q12.2	0.00320384	-4.0481	hypo	3.50838e-07	8.3217	hyper
ITGAL	16p11.2	0.00320384	-4.03337	hypo	0.0023386	-4.20279	hypo
RNF167	17p13.2	0.00320384	-3.91803	hypo	0.000753272	5.09557	hyper
CYP11B2	8q24.3	0.00320384	3.88332	hyper	0.0958963	-2.17601	hypo
HAMP	19q13.12	0.00322651	-3.97736	hypo	0.227349	1.49905	hyper
CLDN3	7q11.23	0.00323287	3.89342	hyper	0.0570853	-2.35911	hypo
KITLG	12q21.32	0.00323287	3.90152	hyper	0.0175695	-3.18246	hypo
GOLGA3	12q24.33	0.00323287	3.94203	hyper	0.73071	0.444761	hyper
OR7C1	19p13.12	0.00323287	3.93848	hyper	0.00643475	-3.44016	hypo
RPL34	4q25	0.00323342	-3.88539	hypo	0.570924	0.711945	hyper
HOXB7	17q21.32	0.00324273	-3.93605	hypo	0.50583	-0.842063	hypo
ZDHHC12	9q34.11	0.00325429	3.86303	hyper	0.489724	0.855294	hyper
ABRA	8q23.1	0.00327323	3.93507	hyper	1.39678e-09	-9.34304	hypo
AQP6	12q13.13	0.00331118	3.91536	hyper	0.921241	0.132873	hyper
ZNF238	1q44	0.00333238	3.94384	hyper	0.000166856	-5.53457	hypo
RNF182	6p23	0.00334264	-3.97567	hypo	0.00264177	-3.92153	hypo
PAK4	19q13.2	0.00334612	3.92899	hyper	0.00100673	4.70936	hyper
FUT4	11q21	0.00337398	-3.99878	hypo	3.75465e-05	6.00508	hyper
LRP12	8q22.3	0.00337553	3.87036	hyper	0.07481	-2.13195	hypo
ST3GAL2	16q22.1	0.00338816	-3.98733	hypo	0.0135414	3.4333	hyper
LBH	2p23.1	0.00338968	-3.84586	hypo	0.000109499	4.79001	hyper
SLC35F2	11q22.3	0.00340323	-3.86475	hypo	0.0132667	-3.60563	hypo
C12orf26	12q21.31	0.00340461	3.88511	hyper	0.679349	0.530438	hyper
ADM	11p15.4	0.00342252	-3.94909	hypo	0.000260169	-6.23415	hypo
MAP3K6	1p36.11	0.00342446	3.90735	hyper	0.00951608	3.35413	hyper
CENTG2	2q37.2	0.00344222	-3.95485	hypo	0.00868156	-3.84518	hypo
KIAA1737	14q24.3	0.00345449	3.90235	hyper	0.0890386	1.9716	hyper
CMTM1	16q21	0.00346356	3.9178	hyper	0.732361	0.443137	hyper
OR5M8	11q11	0.00347338	3.91867	hyper	0.000425211	-5.9265	hypo
KLHL24	3q27.1	0.00348111	-3.87769	hypo	0.255012	-1.3922	hypo
GDE1	16p12.3	0.00348278	-3.95387	hypo	0.17967	1.68499	hyper
PRKCDBP	11p15.4	0.00348857	-3.8956	hypo	0.00011695	5.94207	hyper
TXLNB	6q24.1	0.00349731	3.92154	hyper	0.29469	1.2621	hyper
FBXL13	7q22.1	0.00351337	3.9223	hyper	0.00334552	3.98404	hyper
MYO16	13q33.3	0.00351577	-3.98183	hypo	0.00270242	3.82619	hyper
CMYA5	5q14.1	0.00353005	3.99001	hyper	0.178579	-1.68778	hypo
PANK3	5q35.1	0.00353005	3.93351	hyper	0.0238302	-2.68465	hypo
LOC643226	5q32	0.00353005	-3.90318	hypo	5.90442e-05	-7.03113	hypo
UBE3C	7q36.3	0.00353005	-3.89937	hypo	0.023979	-2.77504	hypo
ANGPTL4	19p13.2	0.00353005	-3.92831	hypo	1.73588e-05	6.94199	hyper
EPB41L2	6q23.2	0.00353225	-3.94517	hypo	3.5646e-05	7.7754	hyper
CASD1	7q21.3	0.00353225	3.92083	hyper	0.000485659	-4.51016	hypo
ULBP1	6q25.1	0.00353396	-3.93253	hypo	0.83877	0.268579	hyper
MRM1	17q12	0.00356061	-3.83466	hypo	0.258256	-1.37316	hypo
PACS1	11q13.1	0.0035625	-3.89369	hypo	0.00300099	4.07252	hyper
EPB41L1	20q11.23	0.0035625	-3.92428	hypo	0.380376	-1.03385	hypo
GPR19	12p13.1	0.00361437	-3.99176	hypo	0.647262	-0.587624	hypo
PCDHB14	5q31.3	0.00363927	3.84152	hyper	0.00032052	5.39764	hyper
EHMT1	9q34.3	0.00364537	3.90834	hyper	0.835918	0.277475	hyper
C19orf36	19p13.3	0.00364537	3.85425	hyper	0.126094	-1.94621	hypo
LILRA4	19q13.42	0.00366093	3.84331	hyper	1.55003e-09	-12.2222	hypo
RHOH	4p14	0.0036669	3.82164	hyper	4.32841e-15	-12.9082	hypo
LYK5	17q23.3	0.00369228	-3.83078	hypo	0.435785	-0.970101	hypo
RNPS1	16p13.3	0.00369957	3.85359	hyper	0.574959	-0.70691	hypo
NANOS3	19p13.12	0.00369957	3.8944	hyper	0.650652	-0.577792	hypo
ASCL1	12q23.2	0.00370421	-3.90446	hypo	4.45986e-05	6.57114	hyper
LOC389207	4p13	0.00371071	3.90543	hyper	8.13759e-05	-5.16547	hypo
CNN1	19p13.2	0.00371071	-3.95387	hypo	9.60209e-08	8.13451	hyper
PRKAR1B	7p22.3	0.00371071	3.8952	hyper	0.00755278	3.86843	hyper
OR7A5	19p13.12	0.00371071	3.91891	hyper	9.10592e-06	-6.24501	hypo
RHBDL3	17q11.2	0.0037298	-3.86089	hypo	0.873367	0.207309	hyper
CNKSR2	23p22.12	0.0037298	3.81531	hyper	0.24691	1.44444	hyper
TCF7L1	2p11.2	0.00373083	-3.92708	hypo	0.0002877	7.34615	hyper
SOCS1	16p13.13	0.00373083	-3.93213	hypo	0.170977	1.73458	hyper
LOC644820	2q33.3	0.00376044	-3.80158	hypo	0.207791	-1.60369	hypo
BTG1	12q21.33	0.00376044	-3.90623	hypo	0.030277	2.8809	hyper
TRAF1	9q33.2	0.00376269	-3.93216	hypo	0.975229	-0.0373629	hypo
POU3F2	6q16.2	0.00376846	-3.82625	hypo	0.0130614	2.97357	hyper
ARNTL2	12p11.23	0.00377037	-3.8451	hypo	0.220838	1.52317	hyper
LARP4	12q13.13	0.00377037	3.93124	hyper	0.0163647	-3.32123	hypo
C8B	1p32.2	0.00377713	-3.93884	hypo	8.27155e-05	-6.38302	hypo
FOXD4L2	9q13	0.00377713	-3.91785	hypo	0.810401	-0.317858	hypo
FOXN2	2p16.3	0.00378127	-3.82258	hypo	0.0742258	-2.35698	hypo
NYX	23p11.4	0.00378127	-3.90916	hypo	0.92826	-0.11852	hypo
SOHLH1	9q34.3	0.00378276	3.81534	hyper	0.0811246	-2.24099	hypo
PRTN3	19p13.3	0.00379006	-3.88367	hypo	0.0258183	2.87983	hyper
TNFRSF11B	8q24.12	0.0037976	-3.8632	hypo	0.0818519	2.19294	hyper
IGFBP6	12q13.13	0.0037976	-3.84218	hypo	4.59927e-06	11.3345	hyper
CALR	19p13.13	0.0037976	-3.90052	hypo	0.00222621	-4.49952	hypo
CDH10	5p14.2	0.00381836	3.95014	hyper	0.0537911	2.20454	hyper
ACTC1	15q14	0.00382027	3.8272	hyper	2.25959e-06	-10.2136	hypo
MYOG	1q32.1	0.00384684	3.85344	hyper	0.0012985	-4.52479	hypo
KLF4	9q31.2	0.00387496	-3.8591	hypo	0.000163457	6.39651	hyper
C9orf129	9q22.31	0.00387496	3.89595	hyper	0.00317432	-3.82729	hypo
NAT1	8p22	0.00389973	3.87807	hyper	0.770093	0.381629	hyper
PTOV1	19q13.33	0.00391089	3.84482	hyper	0.0203733	-3.13616	hypo
TMEM30B	14q23.1	0.00391584	3.8959	hyper	0.996877	0.00440202	hyper
LCAT	16q22.1	0.00391584	3.90577	hyper	0.000447558	5.70779	hyper
EEFSEC	3q21.3	0.00391874	3.86752	hyper	8.82091e-07	-7.79471	hypo
PPM1E	17q22	0.00391874	-3.85384	hypo	0.445399	0.945827	hyper
OR2T12	1q44	0.00394444	3.83218	hyper	0.0187288	-2.93545	hypo
C9orf71	9q13	0.00394444	3.83488	hyper	0.00187129	-4.37818	hypo
ABCG2	4q22.1	0.00396456	-3.823	hypo	0.355811	1.10684	hyper
ZNF342	19q13.32	0.00396456	3.88752	hyper	0.00419035	-4.29289	hypo
FAM19A3	1p13.2	0.00397605	-3.85892	hypo	0.0404657	2.81573	hyper
HIST1H1A	6p22.1	0.00398173	-3.94531	hypo	0.00614213	4.2655	hyper
PIGZ	3q29	0.00398222	3.87515	hyper	0.787504	0.354461	hyper
DHRS3	1p36.22	0.00401053	-3.80108	hypo	1.46222e-07	9.36423	hyper
IFITM2	11p15.5	0.00403775	3.89287	hyper	0.00948985	3.66897	hyper
ALDOA	16p11.2	0.00403904	3.79729	hyper	0.000111186	-5.8107	hypo
CYP2D6	22q13.2	0.00405076	3.86238	hyper	0.813711	0.311716	hyper
C1orf127	1p36.22	0.00405198	-3.90264	hypo	3.05513e-05	6.48376	hyper
ETNK2	1q32.1	0.00405204	3.8672	hyper	0.891006	-0.178319	hypo
THRSP	11q14.1	0.00406246	3.86164	hyper	0.00135087	-3.76135	hypo
NOSTRIN	2q24.3	0.00408341	3.84379	hyper	0.794516	0.342916	hyper
OR4K17	14q11.2	0.00410007	3.9015	hyper	0.719188	-0.464308	hypo
MGAT5	2q21.2	0.00410052	-3.83882	hypo	0.677172	0.533267	hyper
FER1L3	10q23.33	0.00410656	3.90957	hyper	0.00241026	4.28966	hyper
KIAA1026	1p36.21	0.00411186	-3.81954	hypo	8.66444e-12	18.4187	hyper
OR11H4	14q11.2	0.00411186	3.78144	hyper	0.885913	-0.185116	hypo
OR9A4	7q34	0.00414241	3.84644	hyper	3.03669e-08	-10.1591	hypo
RPLP1	15q23	0.00415976	-3.83227	hypo	0.00442695	-3.96181	hypo
NAPG	18p11.22	0.00415976	-3.83615	hypo	0.0816936	2.3154	hyper
NSMCE4A	10q26.13	0.00415976	3.77669	hyper	0.0040662	4.02018	hyper
C19orf23	19p13.3	0.00415976	3.84922	hyper	0.254907	1.38933	hyper
KLHL17	1p36.33	0.004161	3.78135	hyper	0.125703	1.83115	hyper
LSM2	6p21.33	0.004161	3.85479	hyper	0.000342698	-6.26011	hypo
EHD1	11q13.1	0.004161	-3.80524	hypo	0.0571851	-2.50287	hypo
C22orf31	22q12.1	0.004161	-3.84941	hypo	0.877174	-0.204032	hypo
C1QTNF9	13q12.12	0.004161	3.86668	hyper	0.000723584	-6.16954	hypo
SLC10A2	13q33.1	0.004161	3.83249	hyper	7.85992e-05	-7.76573	hypo
LDHD	16q23.1	0.00416691	3.81251	hyper	0.00395409	4.17485	hyper
LIN9	1q42.12	0.00416799	-3.87179	hypo	0.0799447	-2.16437	hypo
SOD3	4p15.2	0.00416799	-3.87481	hypo	0.204904	-1.59427	hypo
RNASEH2C	11q13.1	0.00416799	-3.89619	hypo	0.0187102	2.89598	hyper
KIAA1434	20p12.3	0.00416799	-3.82417	hypo	0.647262	-0.57362	hypo
RPL12	9q33.3	0.00417545	-3.80711	hypo	0.000515504	5.25377	hyper
GPR146	7p22.3	0.00418828	3.78695	hyper	0.29435	-1.30879	hypo
GPRC5B	16p12.3	0.00418828	-3.82032	hypo	0.303778	1.27911	hyper
GRM5	11q14.3	0.00418828	3.81525	hyper	0.0221345	-3.2414	hypo
HPS4	22q12.1	0.00420152	3.83515	hyper	0.0286621	2.78573	hyper
CYS1	2p25.1	0.00425738	-3.90469	hypo	0.00128475	-3.99564	hypo
NKX6-1	4q21.23	0.00425738	-3.84452	hypo	3.68226e-06	9.10878	hyper
UBTD2	5q35.1	0.00427115	3.84807	hyper	4.68883e-05	6.22829	hyper
C7orf50	7p22.3	0.00430927	3.85257	hyper	0.0246454	-2.9572	hypo
FSTL4	5q31.1	0.00432568	-3.91609	hypo	0.20262	1.58582	hyper
HAND1	5q33.2	0.00432568	-3.86194	hypo	6.54465e-08	7.555	hyper
COL1A2	7q21.3	0.00432568	-3.85178	hypo	1.10788e-06	8.90912	hyper
RCAN1	21q22.12	0.00432568	-3.82238	hypo	1.54403e-07	12.7832	hyper
DCHS2	4q32.1	0.00439488	3.78981	hyper	5.28102e-06	-6.30588	hypo
SLC26A9	1q32.1	0.00441499	3.82252	hyper	0.0252269	-2.99193	hypo
DRD2	11q23.2	0.0044316	-3.80505	hypo	0.827198	0.289548	hyper
TJP3	19p13.3	0.0044316	3.79447	hyper	0.176284	1.65995	hyper
LAMP3	3q27.1	0.00444815	-3.83997	hypo	0.139418	-1.82344	hypo
FST	5q11.2	0.00444815	-3.76193	hypo	2.75658e-07	8.9415	hyper
LUC7L	16p13.3	0.00445727	-3.81489	hypo	0.248236	1.43839	hyper
HLA-DOA	6p21.32	0.00447853	3.78439	hyper	0.331095	-1.21207	hypo
ENTPD3	3p22.1	0.00450329	-3.8166	hypo	0.340157	-1.17647	hypo
CPA6	8q13.2	0.00450746	-3.87254	hypo	0.138959	1.75287	hyper
POU2F3	11q23.3	0.00450746	-3.81346	hypo	0.234924	-1.43363	hypo
VENTX	10q26.3	0.00451569	3.72428	hyper	0.254679	-1.37876	hypo
NR2F6	19p13.11	0.00451778	3.81612	hyper	0.00105231	-4.56984	hypo
KIAA0415	7p22.1	0.00451932	3.7957	hyper	0.0317805	-2.92133	hypo
DDIT4L	4q23	0.00451932	-3.81576	hypo	0.999549	-0.000575314	hypo
ARSA	22q13.33	0.00452162	3.74834	hyper	0.711221	0.475386	hyper
HPS6	10q24.32	0.00453311	3.76831	hyper	0.033887	2.90075	hyper
RNGTT	6q15	0.00453407	-3.75566	hypo	0.00973105	3.49339	hyper
MICALCL	11p15.3	0.00454845	-3.81583	hypo	3.00585e-07	6.94985	hyper
PCDHB8	5q31.3	0.00456263	3.84406	hyper	0.671691	0.536569	hyper
UBA1	23p11.3	0.00456263	-3.75537	hypo	0.274413	1.35474	hyper
AZGP1	7q22.1	0.00462115	3.78841	hyper	0.0188744	-3.19767	hypo
ALDH1A1	9q21.13	0.00462264	3.84494	hyper	0.339633	-1.13309	hypo
CALCA	11p15.2	0.00465364	-3.81606	hypo	1.16657e-07	7.65906	hyper
PCDHGA5	5q31.3	0.00465925	3.80861	hyper	0.0920536	2.21385	hyper
DLG2	11q14.1	0.00466465	-3.79493	hypo	1.13312e-05	8.84243	hyper
TBC1D23	3q12.1	0.00467662	-3.83175	hypo	0.0258632	3.11636	hyper
TMEM25	11q23.3	0.00469039	3.73051	hyper	0.865057	0.224588	hyper
GREM1	15q13.3	0.00469541	-3.87384	hypo	0.346418	1.15144	hyper
JPH1	8q21.11	0.00470606	3.79904	hyper	0.150823	-1.68722	hypo
SMO	7q32.1	0.00471993	-3.81899	hypo	4.71134e-10	9.3751	hyper
SLC35C1	11p11.2	0.00472767	-3.7927	hypo	0.924084	-0.126213	hypo
C19orf50	19p13.11	0.00474116	-3.80055	hypo	0.0167082	3.40051	hyper
PGAM1	10q24.1	0.00475359	-3.81318	hypo	0.950408	-0.0825406	hypo
DDX49	19p13.11	0.00475359	3.74944	hyper	0.0260985	-3.09194	hypo
SLC7A5	16q24.2	0.00475857	-3.81442	hypo	0.0386224	2.54546	hyper
ZCCHC3	20p13	0.00479467	3.85455	hyper	0.0166949	2.9955	hyper
FAAH	1p33	0.00480255	3.80786	hyper	0.219154	-1.53146	hypo
USP13	3q26.33	0.00482174	-3.76319	hypo	0.0609809	-2.39748	hypo
RARRES1	3q25.33	0.00483999	-3.80938	hypo	0.0259929	3.00494	hyper
TRIM49	11q14.3	0.00492138	3.781	hyper	3.65082e-16	-11.9883	hypo
SLC38A7	16q21	0.00492138	3.7488	hyper	0.0315238	-2.70381	hypo
FEZF1	7q31.32	0.00494084	-3.77059	hypo	3.55342e-05	6.63353	hyper
C8orf59	8q21.2	0.00494084	-3.81909	hypo	0.418679	1.00431	hyper
AIRE	21q22.3	0.00494084	3.72384	hyper	0.0816162	-2.25483	hypo
GARNL1	14q13.2	0.00494156	3.77861	hyper	0.0177908	-3.10677	hypo
HN1L	16p13.3	0.0049645	3.73612	hyper	0.454807	-0.926506	hypo
DAP	5p15.2	0.00497367	-3.78847	hypo	0.0244835	2.86655	hyper
ECE1	1p36.12	0.00500988	3.80731	hyper	0.0016169	5.03056	hyper
CAMTA2	17p13.2	0.00500988	3.79845	hyper	0.0454968	2.57175	hyper
CIB1	15q26.1	0.00507668	3.85192	hyper	9.69399e-07	-9.36697	hypo
CA6	1p36.23	0.00507744	-3.77996	hypo	0.839057	-0.270354	hypo
LRRN1	3p26.2	0.00508435	-3.78889	hypo	0.0108379	3.70453	hyper
TTC22	1p32.3	0.00508734	-3.73256	hypo	0.447861	-0.921457	hypo
PAXIP1	7q36.2	0.00510452	3.70684	hyper	0.00516161	-3.6634	hypo
FAM76A	1p35.3	0.00510554	-3.76015	hypo	0.010628	3.71816	hyper
F2RL2	5q13.3	0.0051513	-3.7483	hypo	1.42787e-09	15.5704	hyper
CHRNA5	15q25.1	0.00517054	-3.73352	hypo	0.229177	1.47247	hyper
KCTD19	16q22.1	0.00517054	-3.80597	hypo	0.48419	0.870968	hyper
SOX3	23q27.1	0.00517131	-3.71031	hypo	0.00535112	4.23905	hyper
PTDSS1	8q22.1	0.00517716	-3.75276	hypo	2.77325e-05	7.14056	hyper
ZNF775	7q36.1	0.00518633	3.76422	hyper	0.00413994	3.82332	hyper
USP35	11q14.1	0.00521613	3.70571	hyper	0.0170029	3.04477	hyper
PRIMA1	14q32.13	0.00522962	-3.68723	hypo	0.833066	0.281419	hyper
KIAA1984	9q34.3	0.00522962	3.75938	hyper	0.0379232	-2.78962	hypo
CAPS	19p13.3	0.00522962	3.76302	hyper	0.0231108	-3.08861	hypo
NEK5	13q14.3	0.00523805	3.77976	hyper	0.543437	-0.765075	hypo
SLC25A37	8p21.2	0.00524348	-3.77061	hypo	0.376554	-1.06729	hypo
CXCL12	10q11.21	0.00524348	-3.70236	hypo	9.29773e-07	6.33329	hyper
B3GAT2	6q13	0.00525114	-3.78186	hypo	0.163181	1.72981	hyper
PPT2	6p21.32	0.00526636	3.75523	hyper	0.242699	1.3966	hyper
ATAD3A	1p36.33	0.00527156	3.75424	hyper	0.166967	-1.7436	hypo
KRT74	12q13.13	0.00527156	3.69247	hyper	0.00394717	-4.19574	hypo
PDIK1L	1p36.11	0.00527716	3.70877	hyper	1.11133e-05	-8.88082	hypo
RRM2	2p25.1	0.00527716	-3.69034	hypo	3.00585e-07	-11.7409	hypo
IL9	5q31.1	0.00528421	-3.79024	hypo	0.0228842	-3.23524	hypo
DYRK4	12p13.32	0.00528421	-3.78864	hypo	0.2801	-1.33825	hypo
BRI3BP	12q24.31	0.00528739	-3.75053	hypo	1.86704e-06	-9.21481	hypo
MRGPRX4	11p15.1	0.00528739	3.66637	hyper	4.0346e-05	-6.68882	hypo
CDC34	19p13.3	0.0052935	3.70682	hyper	0.16064	1.79657	hyper
CDO1	5q22.3	0.00529865	-3.76563	hypo	0.000581799	5.95213	hyper
CST9L	20p11.21	0.00529865	-3.79716	hypo	0.0111089	-3.29374	hypo
TAL2	9q31.2	0.00529978	3.72666	hyper	3.09654e-08	-11.6364	hypo
PDS5B	13q13.1	0.00529978	3.71286	hyper	0.000498342	4.66309	hyper
LOC152573	4p13	0.00530238	-3.7566	hypo	0.052836	2.48561	hyper
CLDN23	8p23.1	0.00530238	-3.76376	hypo	2.74807e-09	9.82795	hyper
SSTR4	20p11.21	0.00530238	-3.78261	hypo	0.57488	0.688755	hyper
IL18RAP	2q12.1	0.00531133	3.72694	hyper	1.23242e-08	-10.5728	hypo
KCNK17	6p21.2	0.00531133	-3.81402	hypo	0.0634447	-2.32934	hypo
ZNF566	19q13.12	0.00532573	-3.76422	hypo	0.0881835	-2.13936	hypo
DDA1	19p13.11	0.00533444	-3.78432	hypo	0.171048	1.73648	hyper
NDUFB10	16p13.3	0.00533526	-3.71006	hypo	0.963825	0.0592793	hyper
PRUNE	1q21.2	0.00533909	3.82945	hyper	0.28699	-1.32692	hypo
FCER2	19p13.2	0.00533909	-3.79626	hypo	9.89056e-06	-6.16467	hypo
CTRB2	16q23.1	0.00533909	3.68257	hyper	0.981657	-0.0277413	hypo
FLJ11506	15q23	0.00534095	3.80891	hyper	0.0430836	-2.41384	hypo
ORMDL3	17q12	0.00534888	3.69267	hyper	0.0326446	2.72371	hyper
C12orf12	12q21.33	0.00536158	3.745	hyper	0.507793	-0.817443	hypo
ADAMTS12	5p13.3	0.005364	-3.80213	hypo	1.87906e-06	9.69701	hyper
TRPV4	12q24.11	0.00537541	-3.72785	hypo	0.000254469	5.89015	hyper
HTATIP2	11p15.1	0.00539015	-3.72329	hypo	0.000103901	-6.56376	hypo
DAPK1	9q21.33	0.00539916	-3.73116	hypo	1.19212e-07	-12.6427	hypo
PNOC	8p21.1	0.00539993	-3.67234	hypo	0.0082994	3.81903	hyper
PIF1	15q22.31	0.00539993	-3.72668	hypo	0.0573814	-2.52976	hypo
PPAT	4q12	0.00540043	-3.74862	hypo	0.0018719	-3.72143	hypo
SIDT1	3q13.2	0.00540389	3.79927	hyper	0.00021806	-6.13418	hypo
SRPRB	3q22.1	0.0054206	-3.73026	hypo	0.052681	2.42833	hyper
LILRB5	19q13.42	0.0054206	3.69489	hyper	3.30531e-05	-6.52658	hypo
DAPK3	19p13.3	0.00542857	3.76608	hyper	0.855199	-0.240749	hypo
SPHK1	17q25.1	0.00543022	-3.69403	hypo	0.228112	1.53107	hyper
DYNC2LI1	2p21	0.0054385	3.70236	hyper	0.97447	-0.0393203	hypo
SLC1A3	5p13.2	0.00546701	-3.76142	hypo	0.000342826	5.98779	hyper
AGPAT9	4q21.23	0.00547683	-3.75318	hypo	0.00407282	4.35111	hyper
PLEKHO1	1q21.2	0.00548724	-3.75021	hypo	0.000220799	6.60391	hyper
ADD3	10q25.1	0.00548765	-3.76052	hypo	5.43502e-05	6.6456	hyper
OAT	10q26.13	0.00548826	3.69232	hyper	0.0639493	2.32469	hyper
SRD5A1	5p15.31	0.00549593	-3.71309	hypo	7.19461e-06	-9.83318	hypo
GTPBP4	10p15.3	0.00550611	-3.77301	hypo	0.891006	0.176878	hyper
OR9I1	11q12.1	0.00552133	3.66859	hyper	0.177398	-1.72417	hypo
CLASP2	3p22.3	0.00552256	3.75756	hyper	0.00234638	4.27633	hyper
SELPLG	12q24.11	0.0055358	-3.72622	hypo	7.94948e-07	-7.38715	hypo
INSM1	20p11.23	0.00553765	-3.72599	hypo	0.000408092	6.38628	hyper
MAP3K7IP3	23p21.2	0.00556984	3.77849	hyper	0.0204132	-3.12278	hypo
KIAA0495	1p36.32	0.0056236	3.67513	hyper	0.315048	1.2486	hyper
SQLE	8q24.13	0.00563899	-3.63229	hypo	0.539116	-0.763246	hypo
DHRS12	13q14.3	0.00564808	-3.66421	hypo	0.567665	-0.72186	hypo
GFRA1	10q25.3	0.00566198	3.74931	hyper	9.06019e-06	-5.54653	hypo
CPD	17q11.2	0.00566243	-3.7529	hypo	0.00609252	3.96682	hyper
FIGLA	2p13.3	0.00566439	-3.69068	hypo	0.932006	-0.111728	hypo
SEMA6A	5q23.1	0.00566439	-3.68177	hypo	0.0189001	2.86642	hyper
XRCC6BP1	12q14.1	0.00567009	-3.7234	hypo	0.210127	1.58022	hyper
TMPRSS2	21q22.3	0.00567965	-3.73364	hypo	0.125703	-1.89444	hypo
KRT75	12q13.13	0.00569424	3.63165	hyper	2.06356e-07	-7.03098	hypo
LOC650137	15q11.2	0.00572919	3.69237	hyper	0.136646	-1.80565	hypo
GSTM2	1p13.3	0.00574953	3.73601	hyper	0.106961	2.01771	hyper
PDE6C	10q23.33	0.00579583	3.61427	hyper	0.0178378	-3.28333	hypo
CDAN1	15q15.2	0.00579688	3.72756	hyper	0.0465711	2.63886	hyper
CLTCL1	22q11.21	0.00582562	-3.71202	hypo	0.0019063	4.51154	hyper
RNASE11	14q11.2	0.0058308	3.76585	hyper	3.01845e-08	-8.01961	hypo
SLC20A1	2q13	0.00584958	3.66782	hyper	0.845963	-0.258595	hypo
TMEM74	8q23.1	0.00584958	3.61226	hyper	0.000969572	-4.86232	hypo
DBNL	7p13	0.00585744	-3.6542	hypo	0.674568	-0.528035	hypo
C1orf95	1q42.12	0.00586003	-3.66242	hypo	0.471781	-0.889714	hypo
COL5A1	9q34.3	0.00586003	3.62754	hyper	0.34803	-1.14135	hypo
C9orf163	9q34.3	0.00588344	3.69446	hyper	0.0209704	-3.11014	hypo
OR2G6	1q44	0.00590199	3.62533	hyper	2.27541e-07	-10.8195	hypo
C6orf27	6p21.33	0.00590574	3.6787	hyper	0.376945	-1.08441	hypo
FAM43A	3q29	0.00592189	-3.70303	hypo	0.864606	-0.2265	hypo
DPF3	14q24.2	0.00592209	-3.64875	hypo	0.000492271	4.73748	hyper
VAV3	1p13.3	0.0059504	3.66817	hyper	0.00266925	-3.81699	hypo
SEPW1	19q13.32	0.00597542	3.632	hyper	4.02984e-05	6.22672	hyper
WDR27	6q27	0.00598339	-3.70761	hypo	0.144711	1.7948	hyper
HLF	17q22	0.00598339	-3.68003	hypo	0.0633889	2.37713	hyper
GAB1	4q31.21	0.0059906	3.72602	hyper	0.457791	-0.929683	hypo
FAM107A	3p14.2	0.0059906	-3.72523	hypo	0.0292072	2.92365	hyper
CD5L	1q23.1	0.00600967	3.64158	hyper	0.340157	-1.18564	hypo
C11orf41	11p13	0.00601025	3.67116	hyper	8.63428e-07	-6.76715	hypo
FOXP1	3p14.1	0.00602772	3.67174	hyper	0.689607	0.507469	hyper
ZBTB24	6q21	0.00603112	-3.62911	hypo	0.0192786	-3.24249	hypo
WWP1	8q21.3	0.00603112	3.6567	hyper	0.0063254	3.85141	hyper
C1QTNF3	5p13.3	0.00604963	-3.67005	hypo	0.00113277	5.2792	hyper
C8orf4	8p11.21	0.00605197	3.67272	hyper	0.580949	0.690612	hyper
LONRF2	2q11.2	0.00605334	3.72603	hyper	0.73111	-0.437103	hypo
DMN	15q26.3	0.00605334	-3.71537	hypo	4.84526e-07	10.9126	hyper
EIF4A3	17q25.3	0.00605334	-3.65861	hypo	0.00904862	-3.50839	hypo
GATA6	18q11.2	0.00605874	-3.67856	hypo	0.049998	2.5033	hyper
FLT3LG	19q13.33	0.00605874	-3.68077	hypo	0.807646	0.321492	hyper
MS4A15	11q12.2	0.00605874	3.62854	hyper	1.53694e-06	-9.4543	hypo
ZNF179	17p11.2	0.00605874	3.62436	hyper	0.309596	1.25382	hyper
SKP2	5p13.2	0.00606216	-3.64017	hypo	0.217083	-1.48545	hypo
DUSP4	8p21.1	0.00607589	3.65254	hyper	0.559928	0.730978	hyper
EGLN2	19q13.2	0.00612599	3.67735	hyper	0.670663	-0.538088	hypo
TGFB3	14q24.3	0.00612655	3.68272	hyper	0.261644	-1.39787	hypo
RELN	7q22.1	0.006129	-3.65705	hypo	0.119366	1.99906	hyper
NISCH	3p21.1	0.00613272	3.67212	hyper	0.429673	0.96313	hyper
MASTL	10p12.1	0.00613272	-3.66475	hypo	0.00268548	-4.39941	hypo
BLNK	10q24.1	0.00613272	3.6453	hyper	0.14458	-1.86501	hypo
CST8	20p11.21	0.0061381	-3.69284	hypo	0.0352807	-2.83876	hypo
FBXW4	10q24.32	0.00615332	3.64796	hyper	0.605491	0.653429	hyper
WDR72	15q21.3	0.00616612	-3.72441	hypo	0.0257266	2.75789	hyper
MAP6D1	3q27.1	0.00620407	3.6592	hyper	0.480127	-0.862847	hypo
GPR92	12p13.31	0.00625273	-3.66676	hypo	0.000382577	-5.93986	hypo
C6orf89	6p21.2	0.00627678	-3.64539	hypo	0.68542	-0.521267	hypo
NOL12	22q13.1	0.00627678	-3.63983	hypo	0.648059	-0.582636	hypo
VAV2	9q34.2	0.00627678	3.71195	hyper	0.000723584	-4.3457	hypo
SYT6	1p13.2	0.00628957	-3.64164	hypo	1.29446e-05	8.1434	hyper
FLJ45983	10p14	0.00632462	3.7195	hyper	0.967104	-0.0523026	hypo
OR5M3	11q11	0.00632862	3.65677	hyper	0.102987	-1.96292	hypo
CCDC70	13q14.3	0.00633699	-3.79016	hypo	0.150144	-1.8056	hypo
STK17A	7p13	0.00634262	-3.67003	hypo	0.221888	-1.51453	hypo
IGF1R	15q26.3	0.00634919	3.73094	hyper	0.108047	1.93229	hyper
RBMS3	3p24.1	0.00635104	3.62368	hyper	0.0385455	2.63964	hyper
C1orf58	1q41	0.00644702	-3.61034	hypo	0.982246	0.026551	hyper
IL1A	2q13	0.00647236	-3.6545	hypo	0.0059334	4.07019	hyper
ERCC4	16p13.12	0.00647236	3.61765	hyper	0.0887475	-2.27766	hypo
PCDHB15	5q31.3	0.00649212	3.65377	hyper	0.446391	-0.935967	hypo
ZCCHC4	4p15.2	0.0065103	3.69609	hyper	0.0453348	2.53856	hyper
SLC16A13	17p13.1	0.0065103	-3.68747	hypo	0.600173	-0.665324	hypo
MIA	19q13.2	0.0065103	-3.70333	hypo	2.02061e-06	9.15541	hyper
ZNF148	3q21.2	0.00651498	3.62876	hyper	0.185414	1.62798	hyper
ADAMTS10	19p13.2	0.00654579	-3.67008	hypo	2.8501e-05	9.05659	hyper
TM4SF20	2q36.3	0.00655666	3.6069	hyper	0.00500461	-4.13428	hypo
PPP1R2	3q29	0.00656373	-3.59627	hypo	0.000956986	5.51027	hyper
HSPA12A	10q25.3	0.00656373	3.61345	hyper	0.0349333	-2.85947	hypo
CALD1	7q33	0.00657714	3.591	hyper	1.47471e-06	7.22537	hyper
ZNF688	16p11.2	0.00659867	3.67295	hyper	7.9324e-05	-8.71553	hypo
C19orf57	19p13.12	0.00661205	-3.65506	hypo	0.168936	-1.77913	hypo
LY6K	8q24.3	0.00661205	3.57622	hyper	0.702562	0.481424	hyper
OR11A1	6p22.1	0.00662371	3.624	hyper	3.99967e-05	-6.99555	hypo
SURF1	9q34.2	0.00665074	-3.62112	hypo	0.000206745	4.92074	hyper
ANP32C	4q32.3	0.00665483	3.62103	hyper	0.00134006	-4.77808	hypo
CDKN2B	9p21.3	0.00668336	-3.65903	hypo	5.78097e-05	8.32657	hyper
HS3ST3B1	17p12	0.00668336	-3.60161	hypo	0.783514	0.355991	hyper
KRT73	12q13.13	0.00668336	3.60136	hyper	0.521825	-0.794145	hypo
PCDHGB3	5q31.3	0.0066841	3.61867	hyper	0.384575	1.08098	hyper
TP53INP1	8q22.1	0.00669174	3.64636	hyper	0.0547711	-2.31545	hypo
TLE3	15q23	0.00669315	3.68105	hyper	0.420171	-0.990925	hypo
UCKL1	20q13.33	0.00669315	3.64478	hyper	0.316287	-1.24056	hypo
MAPK8IP3	16p13.3	0.00669467	3.65146	hyper	0.337134	-1.19518	hypo
AKR1CL1	10p15.1	0.00671342	-3.67669	hypo	0.0261788	3.0285	hyper
EXOSC5	19q13.2	0.00671342	-3.60492	hypo	0.881642	0.195822	hyper
KTN1	14q22.3	0.00671342	3.6369	hyper	0.25935	-1.40869	hypo
DKFZp667G2110	3q11.2	0.00671668	3.5903	hyper	1.35626e-06	-8.19464	hypo
LECT1	13q21.1	0.00672186	3.65568	hyper	0.584624	0.685749	hyper
ZNF671	19q13.43	0.00672852	3.66272	hyper	0.456495	-0.902878	hypo
MAD2L1	4q27	0.006742	-3.59476	hypo	0.874908	-0.20689	hypo
ACAD10	12q24.12	0.00674486	3.61677	hyper	0.000285764	-5.24978	hypo
RPS6KL1	14q24.3	0.00676222	3.66451	hyper	0.937197	-0.10517	hypo
TMEM121	14q32.33	0.00676687	3.59116	hyper	0.346438	-1.14804	hypo
B4GALNT2	17q21.32	0.0067709	-3.63697	hypo	0.283286	-1.32132	hypo
DDR2	1q23.3	0.00678837	-3.66886	hypo	4.84526e-07	12.5366	hyper
RPL7	8q21.11	0.00678986	-3.67151	hypo	0.228631	1.4486	hyper
OR5BU1	1q44	0.00679904	3.6023	hyper	2.78552e-15	-12.511	hypo
HUNK	21q22.11	0.00680863	-3.6528	hypo	0.0560109	2.5534	hyper
SLC35A2	23p11.23	0.00681357	3.59579	hyper	0.23018	-1.39792	hypo
CARTPT	5q13.2	0.00681877	-3.6844	hypo	1.67348e-08	9.91045	hyper
E2F5	8q21.2	0.00681877	-3.64086	hypo	0.031837	-3.01737	hypo
FLJ45537	9q21.33	0.00682428	3.57154	hyper	0.000360752	-4.90895	hypo
FMO1	1q24.3	0.00684858	3.65313	hyper	0.83611	0.275307	hyper
REEP4	8p21.3	0.00687891	3.62838	hyper	0.00516561	-3.87967	hypo
PKIA	8q21.12	0.00689358	-3.66363	hypo	0.000192842	6.10445	hyper
PRSS8	16p11.2	0.00689358	3.63018	hyper	0.471218	0.883345	hyper
PCGF2	17q12	0.00689358	3.63134	hyper	0.0181174	-3.12493	hypo
OR12D2	6p22.1	0.0068967	3.62523	hyper	3.08351e-08	-10.0576	hypo
ZNF664	12q24.31	0.0069185	3.6128	hyper	0.299757	-1.26991	hypo
PITX1	5q31.1	0.00691895	-3.59591	hypo	1.68368e-05	-6.22038	hypo
PAWR	12q21.2	0.00692075	3.6086	hyper	0.457498	0.899333	hyper
LRRC8B	1p22.2	0.00693596	-3.58292	hypo	0.000952581	4.14964	hyper
VPS26B	11q25	0.00693596	-3.59299	hypo	0.0159081	3.44068	hyper
OR9Q1	11q12.1	0.00693596	3.58266	hyper	6.71455e-05	-4.66526	hypo
ACSF2	17q21.33	0.00693803	-3.69838	hypo	1.2689e-05	6.64733	hyper
KIAA1279	10q21.3	0.00695115	3.61937	hyper	0.000149402	-5.64133	hypo
FIBIN	11p14.2	0.00695542	3.56636	hyper	0.0584923	-2.47621	hypo
RASEF	9q21.32	0.00698151	3.57118	hyper	0.19614	-1.64771	hypo
ZHX3	20q12	0.00700555	3.62655	hyper	0.0139349	3.46861	hyper
HCST	19q13.12	0.00702459	-3.61764	hypo	0.0599778	-2.365	hypo
SLC16A12	10q23.31	0.00703917	-3.59763	hypo	0.000139751	-5.45347	hypo
SGEF	3q25.2	0.00704808	3.56955	hyper	0.480435	0.874517	hyper
SNX33	15q24.2	0.00704808	3.59468	hyper	1.96679e-05	8.56175	hyper
ACTRT2	1p36.32	0.00705362	3.59798	hyper	0.000290795	-5.87823	hypo
TRMT6	20p12.3	0.00705907	-3.60634	hypo	0.0476814	-2.62647	hypo
KIAA1530	4p16.3	0.00706515	3.56758	hyper	0.780337	-0.36658	hypo
P2RY5	13q14.2	0.00706515	3.66698	hyper	0.825586	-0.292656	hypo
ZNF217	20q13.2	0.00706642	-3.61913	hypo	0.138792	-1.75088	hypo
NDUFAF1	15q15.1	0.00706642	3.61176	hyper	0.816089	-0.306227	hypo
KIAA0408	6q22.33	0.00707842	3.64529	hyper	0.0690076	-2.28766	hypo
CYP11B1	8q24.3	0.00707842	3.56321	hyper	0.0873801	-2.25607	hypo
CASC5	15q15.1	0.00707842	3.61072	hyper	0.00775535	-4.14903	hypo
NPSR1	7p14.3	0.00708382	-3.62145	hypo	0.310301	-1.25245	hypo
SERPINB4	18q21.33	0.00708382	3.64409	hyper	4.21915e-05	-6.45116	hypo
KCNK13	14q32.11	0.00710838	-3.60755	hypo	0.0837379	2.0918	hyper
ADPRH	3q13.33	0.0071501	-3.62478	hypo	0.00535755	3.94468	hyper
UNQ9391	8p23.1	0.00715849	3.59064	hyper	4.20432e-09	-10.1832	hypo
NAE1	16q22.1	0.00716137	-3.62264	hypo	0.0139296	-3.1009	hypo
ANKRD27	19q13.11	0.00720701	-3.57667	hypo	0.0716886	-2.32829	hypo
IQCE	7p22.2	0.00720851	3.59956	hyper	0.00450283	-4.25078	hypo
TMEM104	17q25.1	0.00721047	-3.66635	hypo	0.00824931	-3.62767	hypo
SOX12	20p13	0.00721654	3.62155	hyper	0.296697	-1.29648	hypo
COTL1	16q24.1	0.00722397	-3.65942	hypo	0.698481	-0.491168	hypo
WDR35	2p24.1	0.00723858	3.5622	hyper	0.0985237	2.09854	hyper
CPT2	1p32.3	0.00723858	-3.58318	hypo	0.000972995	5.3111	hyper
RP1	8q12.1	0.00724127	-3.66727	hypo	0.0890386	2.10624	hyper
PAFAH1B3	19q13.2	0.00727918	3.58384	hyper	0.000256575	-5.16063	hypo
PALM2	9q31.3	0.00728845	-3.53716	hypo	0.358801	1.09226	hyper
C1orf164	1p34.1	0.00729497	-3.56883	hypo	0.00466958	3.90825	hyper
NR4A3	9q31.1	0.00729497	-3.5628	hypo	0.220838	1.47068	hyper
TTLL10	1p36.33	0.00730259	3.5629	hyper	0.584048	0.690561	hyper
HSPB1	7q11.23	0.00735291	3.60418	hyper	0.0025111	-4.56873	hypo
TNFAIP8L1	19p13.3	0.00735291	3.51594	hyper	0.388191	-1.07377	hypo
OR2Y1	5q35.3	0.0073555	3.55891	hyper	1.0246e-13	-14.0986	hypo
ZNF470	19q13.43	0.0073555	-3.5989	hypo	0.00153647	5.46723	hyper
FOXP2	7q31.1	0.00735727	3.64404	hyper	9.69399e-07	-7.82394	hypo
DGAT2	11q13.5	0.00735727	-3.64079	hypo	0.119466	1.90772	hyper
ATP6V0D2	8q21.2	0.00736332	-3.66433	hypo	0.287222	-1.2949	hypo
CRYGN	7q36.1	0.00737152	3.54906	hyper	0.00355394	4.71867	hyper
MRGPRX3	11p15.1	0.00737152	3.64205	hyper	0.00407682	-4.02628	hypo
SLC17A1	6p22.2	0.00740561	3.5811	hyper	0.0135842	-3.01036	hypo
ZAK	2q31.1	0.00740713	3.62033	hyper	0.000184453	5.32121	hyper
SEMA3F	3p21.31	0.00741088	3.60728	hyper	0.757022	0.402253	hyper
PCDHA5	5q31.3	0.00741156	3.60727	hyper	0.246763	1.40267	hyper
OSBPL10	3p23	0.00742404	3.56113	hyper	0.114661	-2.0288	hypo
GAD1	2q31.1	0.00742404	-3.6201	hypo	1.53016e-06	9.97719	hyper
ICAM5	19p13.2	0.00743726	-3.60756	hypo	7.36865e-05	5.23471	hyper
PPP1R16B	20q11.23	0.00744449	-3.69205	hypo	0.0449301	2.78261	hyper
HTR1E	6q15	0.0074699	-3.6705	hypo	0.532069	-0.781104	hypo
BTN2A3	6p22.1	0.00747279	-3.62755	hypo	0.199579	1.548	hyper
USP6NL	10p14	0.00747279	-3.68178	hypo	9.4194e-10	12.4693	hyper
HNRPLL	2p22.1	0.00751547	-3.59015	hypo	0.126556	1.85174	hyper
INSC	11p15.2	0.00751547	-3.63585	hypo	0.288997	-1.2515	hypo
ENY2	8q23.1	0.00753077	-3.53751	hypo	0.709712	0.471796	hyper
C16orf75	16p13.13	0.00753077	-3.60483	hypo	0.734199	0.43965	hyper
FMNL3	12q13.12	0.00757064	-3.59597	hypo	0.000471725	5.55201	hyper
C9orf32	9q34.11	0.00758746	-3.62525	hypo	0.00155362	4.51148	hyper
NCAM2	21q21.1	0.00758955	3.60906	hyper	0.0106525	3.38421	hyper
TMEM82	1p36.21	0.00759137	3.58097	hyper	0.00558705	-3.94576	hypo
CCL22	16q13	0.00765588	-3.6446	hypo	0.00452272	-3.96916	hypo
MLZE	8q24.21	0.00767487	-3.58875	hypo	0.00200754	-4.66901	hypo
DRAP1	11q13.1	0.00768116	3.52027	hyper	0.00970948	3.73845	hyper
TUBGCP2	10q26.3	0.00769505	3.55333	hyper	0.446696	-0.933683	hypo
RCVRN	17p13.1	0.00769741	3.50095	hyper	0.0104259	-3.3427	hypo
ADPGK	15q24.1	0.00770076	-3.55683	hypo	0.0017019	4.6441	hyper
GRAMD1B	11q24.1	0.00770425	3.49872	hyper	0.199697	-1.57504	hypo
WNT7B	22q13.31	0.00774409	-3.58139	hypo	0.00181133	-4.29935	hypo
STXBP5L	3q13.33	0.0077625	-3.61858	hypo	0.83877	-0.272565	hypo
SYDE1	19p13.12	0.00776991	-3.54635	hypo	7.75075e-08	8.96948	hyper
EMP2	16p13.13	0.00776991	3.55891	hyper	0.820049	-0.299911	hypo
KLK3	19q13.33	0.00777266	3.6178	hyper	0.000374071	-5.26921	hypo
ALAS1	3p21.1	0.00778235	-3.57436	hypo	0.0423308	2.51926	hyper
SGMS2	4q25	0.00778245	3.51274	hyper	0.0104594	3.84166	hyper
CLRN1	3q25.1	0.0077875	-3.63452	hypo	0.938063	-0.101545	hypo
AMFR	16q13	0.00781953	3.60245	hyper	0.152514	1.8043	hyper
FXYD1	19q13.12	0.00781953	3.5565	hyper	0.0177939	2.99956	hyper
MAML1	5q35.3	0.00781989	-3.52216	hypo	7.55635e-07	9.42652	hyper
CYB561	17q23.3	0.00781989	3.59947	hyper	0.000390451	4.69604	hyper
C9orf25	9p13.3	0.00782411	3.50158	hyper	4.17064e-06	7.22621	hyper
TCL1A	14q32.13	0.00783529	-3.58141	hypo	0.000138106	-5.55175	hypo
TMPRSS6	22q12.3	0.00783529	-3.63146	hypo	0.63836	0.599523	hyper
LOC348174	16q22.1	0.00783762	3.54153	hyper	0.491712	-0.855647	hypo
LCN9	9q34.3	0.0078613	3.54032	hyper	0.000770375	-5.2904	hypo
FAM83H	8q24.3	0.00788542	3.57683	hyper	0.988725	-0.0163374	hypo
UBE2F	2q37.3	0.00788542	-3.55397	hypo	0.669828	0.53657	hyper
RPS15	19p13.3	0.00789454	3.56484	hyper	0.695828	-0.501349	hypo
KLK14	19q13.33	0.00789454	3.50668	hyper	0.152149	-1.79821	hypo
CAB39	2q37.1	0.00792421	-3.53203	hypo	0.846111	-0.254684	hypo
ZNF26	12q24.33	0.00793483	-3.55223	hypo	8.87221e-05	-5.68221	hypo
MT1G	16q13	0.0079409	-3.51596	hypo	0.0676221	-2.29046	hypo
LMNB2	19p13.3	0.00794293	3.5451	hyper	0.53425	0.782017	hyper
ARHGEF10	8p23.3	0.00795922	3.53557	hyper	0.00931056	3.73649	hyper
TCOF1	5q33.1	0.00795922	-3.56575	hypo	0.00835222	3.31969	hyper
GTF2E2	8p12	0.00795922	-3.58015	hypo	0.847705	-0.254979	hypo
APAF1	12q23.1	0.00795922	-3.52087	hypo	0.000425184	6.05049	hyper
FTMT	5q23.1	0.00797011	3.51018	hyper	0.00564864	-4.37157	hypo
RCAN3	1p36.11	0.00797011	-3.51251	hypo	0.805076	0.325889	hyper
TTF2	1p13.1	0.00797011	-3.53816	hypo	0.010926	-3.55483	hypo
WNT3A	1q42.13	0.00797011	-3.58575	hypo	1.0599e-06	6.3507	hyper
CHCHD6	3q21.3	0.00797011	-3.53699	hypo	0.0557473	2.59163	hyper
TUBB8	10p15.3	0.00797011	3.53837	hyper	0.646624	0.584746	hyper
C20orf200	20q13.33	0.00797011	3.50804	hyper	0.0163647	-3.25892	hypo
CAV3	3p25.3	0.00797441	-3.60201	hypo	0.141656	-1.82853	hypo
PCDHGB5	5q31.3	0.00797908	3.58067	hyper	0.0897692	2.20802	hyper
HSPC111	5q35.2	0.00797908	-3.5844	hypo	0.0112957	-3.51283	hypo
PPARGC1A	4p15.2	0.00798649	3.58099	hyper	4.07738e-13	13.6147	hyper
MB	22q12.3	0.00798649	-3.56153	hypo	0.831681	-0.284144	hypo
RER1	1p36.32	0.00799014	3.5227	hyper	1.04582e-05	6.13777	hyper
EMCN	4q23	0.00799014	-3.5615	hypo	0.298446	-1.25654	hypo
C12orf57	12p13.31	0.00799014	3.61612	hyper	0.0981831	-2.02734	hypo
ROGDI	16p13.3	0.00800102	3.51257	hyper	0.342068	-1.16185	hypo
PIP5K3	2q33.3	0.00801959	-3.54162	hypo	9.66591e-05	7.56866	hyper
SLFN13	17q12	0.0080255	-3.49969	hypo	1.53275e-07	8.49456	hyper
SFRS7	2p22.1	0.00803541	-3.55812	hypo	0.766879	-0.387025	hypo
KIAA1946	2q32.1	0.00803827	-3.56005	hypo	1.18581e-05	9.65457	hyper
SMCR7	17p11.2	0.00814889	3.55586	hyper	0.237909	-1.4573	hypo
DDI2	1p36.21	0.00817412	3.59442	hyper	0.00108676	-4.99405	hypo
EXOC8	1q42.2	0.00817412	-3.5517	hypo	0.692651	-0.508012	hypo
MRFAP1L1	4p16.1	0.00817814	3.5005	hyper	0.455586	-0.907086	hypo
C10orf90	10q26.2	0.00817814	3.49659	hyper	1.47948e-07	-7.41743	hypo
MID1	23p22.2	0.00817888	3.49637	hyper	0.303744	-1.28158	hypo
TMED1	19p13.2	0.00819164	3.6	hyper	0.888674	-0.182381	hypo
HES7	17p13.1	0.00819934	-3.4853	hypo	0.0978584	-2.07236	hypo
CACNA2D3	3p21.1	0.00820875	-3.5509	hypo	1.68368e-05	7.60017	hyper
POU3F4	23q21.1	0.00821582	3.53159	hyper	0.000498342	5.21935	hyper
PRND	20p13	0.00826366	3.52894	hyper	0.00787037	-3.46632	hypo
EBF4	20p13	0.00830502	-3.5914	hypo	0.00160751	4.69969	hyper
GDNF	5p13.2	0.00833089	-3.5723	hypo	0.305581	-1.25117	hypo
C2orf15	2q11.2	0.00834102	3.51405	hyper	0.170233	1.74622	hyper
WDR6	3p21.31	0.00837172	3.48557	hyper	7.93887e-05	-7.12212	hypo
C1QTNF1	17q25.3	0.0083807	-3.59121	hypo	0.00174256	4.65061	hyper
C17orf70	17q25.3	0.00838318	3.50018	hyper	0.586754	0.689565	hyper
PCDHB5	5q31.3	0.00840941	3.54798	hyper	0.00158693	4.43749	hyper
FEZ1	11q24.2	0.00842318	-3.52017	hypo	0.0804473	-2.28355	hypo
EPHA7	6q16.1	0.00843588	-3.5428	hypo	0.000128077	6.32729	hyper
SSPN	12p12.1	0.00846793	-3.49389	hypo	0.0012739	5.45321	hyper
C13orf16	13q34	0.00848093	3.48376	hyper	0.199587	-1.62036	hypo
C4orf37	4q23	0.00850519	3.49487	hyper	0.0376584	2.76145	hyper
C3orf52	3q13.2	0.008594	3.48866	hyper	0.000921137	-5.69427	hypo
ING2	4q35.1	0.008594	3.59404	hyper	0.121518	-2.03879	hypo
PLEKHG2	19q13.2	0.008594	-3.47293	hypo	3.01523e-05	7.20367	hyper
TMC2	20p13	0.008594	3.45736	hyper	1.03846e-06	-6.42289	hypo
PGRMC1	23q24	0.0085999	-3.56736	hypo	0.00541422	4.0642	hyper
MYBBP1A	17p13.2	0.00863344	-3.55476	hypo	0.780337	0.368074	hyper
GLOD5	23p11.23	0.00863344	-3.51336	hypo	0.0025039	-3.62666	hypo
REM2	14q11.2	0.00863563	3.5222	hyper	2.02204e-08	9.20875	hyper
MAPK9	5q35.3	0.00865146	3.5464	hyper	0.228112	-1.51422	hypo
SLC6A4	17q11.2	0.00866857	-3.51119	hypo	0.142131	-1.8641	hypo
BCL2L1	20q11.21	0.00873521	3.52241	hyper	0.719188	-0.462968	hypo
CXCL17	19q13.2	0.00875211	3.50992	hyper	0.357758	1.09362	hyper
C19orf48	19q13.33	0.00875368	-3.46992	hypo	0.000970957	4.29065	hyper
SLC35A5	3q13.2	0.00876121	-3.48041	hypo	0.004616	-3.78981	hypo
PCDHA4	5q31.3	0.00878618	3.50526	hyper	0.00505074	3.8862	hyper
MASP2	1p36.22	0.0087867	3.48362	hyper	0.200892	-1.61566	hypo
THSD4	15q23	0.0087867	3.5203	hyper	6.04698e-05	-7.51518	hypo
AMAC1L2	8p23.1	0.00880844	3.48789	hyper	0.106842	-2.08977	hypo
KLHDC9	1q23.3	0.00881117	3.47834	hyper	0.0292072	2.75865	hyper
EPHB6	7q34	0.00881623	3.48635	hyper	1.7526e-05	-6.15963	hypo
NOG	17q22	0.00885407	-3.56291	hypo	0.0107143	3.13982	hyper
PTPLA	10p12.33	0.00888017	-3.5072	hypo	0.950467	-0.0815441	hypo
PNCK	23q28	0.00889281	3.47618	hyper	0.0135131	3.65711	hyper
TENC1	12q13.13	0.00890674	3.51914	hyper	0.0458436	2.50089	hyper
C14orf4	14q24.3	0.00892315	3.52214	hyper	3.35705e-05	-6.17064	hypo
BUB3	10q26.13	0.00893379	3.50695	hyper	0.271055	1.38491	hyper
HHAT	1q32.2	0.00894806	3.5286	hyper	0.0534772	-2.45613	hypo
KCNF1	2p25.1	0.00894899	3.47992	hyper	0.0068407	-3.88938	hypo
XPO5	6p21.1	0.00895224	-3.49765	hypo	0.264391	-1.38371	hypo
TEAD1	11p15.2	0.00898858	-3.5095	hypo	4.1415e-05	7.92532	hyper
MARCO	2q14.2	0.0090088	3.51426	hyper	0.00023523	-5.95789	hypo
LOC646603	4q31.22	0.00901124	3.47372	hyper	0.0297113	3.02224	hyper
ZBED4	22q13.33	0.00901124	3.51341	hyper	0.913095	-0.146978	hypo
TMEM16G	2q37.3	0.00902246	3.46558	hyper	0.237909	-1.46269	hypo
SPARCL1	4q22.1	0.00902246	-3.50661	hypo	3.77383e-08	17.1156	hyper
DDC	7p12.2	0.00903317	3.46579	hyper	0.00781802	-3.75748	hypo
SLC47A1	17p11.2	0.0090371	-3.52516	hypo	1.66587e-06	-8.14211	hypo
ALPI	2q37.1	0.00905384	3.46448	hyper	0.0274925	-2.89685	hypo
GALNT6	12q13.13	0.00905875	3.49143	hyper	4.71134e-10	-10.3867	hypo
SEPT12	16p13.3	0.00905875	3.49243	hyper	0.953755	0.0779537	hyper
LTBP4	19q13.2	0.00906573	-3.53134	hypo	0.0168558	-3.07421	hypo
PTP4A3	8q24.3	0.00906757	3.47603	hyper	0.0300194	-2.89306	hypo
TFAP2A	6p24.3	0.00907085	3.53516	hyper	0.00297091	-4.05154	hypo
FAM74A3	9p12	0.00907901	3.46599	hyper	2.13193e-10	-9.84919	hypo
ZNF91	19p12	0.00907901	3.52264	hyper	1.53694e-06	7.17653	hyper
MCM2	3q21.3	0.00908707	-3.49282	hypo	0.00980607	-3.73354	hypo
GPR55	2q37.1	0.00909686	3.48146	hyper	0.00572727	-4.08284	hypo
WDR42B	23p21.3	0.0090982	-3.48292	hypo	0.00270857	-4.39695	hypo
FGFR1OP	6q27	0.00910777	3.50257	hyper	0.00431165	-3.8294	hypo
LBXCOR1	15q23	0.00910777	-3.49091	hypo	0.000485088	5.41106	hyper
UCHL1	4p13	0.00911198	-3.47261	hypo	0.149117	-1.80748	hypo
TMEFF2	2q32.3	0.00914352	-3.48898	hypo	1.22898e-05	8.15489	hyper
OR5R1	11q11	0.00916647	3.4833	hyper	0.000414945	-4.4261	hypo
GOLGA5	14q32.12	0.00917616	3.49681	hyper	0.0157418	3.46771	hyper
TPM4	19p13.12	0.00924102	-3.45622	hypo	0.848887	-0.248506	hypo
ANG	14q11.2	0.00924102	3.44924	hyper	0.502501	-0.822328	hypo
RPSA	3p22.1	0.00926444	-3.50216	hypo	0.161958	-1.75378	hypo
BCL2L11	2q13	0.0092807	-3.56475	hypo	0.318662	-1.18584	hypo
RBM15	1p13.3	0.00931529	-3.43689	hypo	0.047318	-2.57456	hypo
PPP1R8	1p35.3	0.00937223	3.53221	hyper	0.0476814	2.45577	hyper
PLXNA4	7q32.3	0.00940524	-3.52698	hypo	0.0548657	2.27092	hyper
MRC2	17q23.2	0.00941459	-3.435	hypo	0.0162231	3.22633	hyper
ZNF208	19p12	0.00941459	3.5048	hyper	4.79811e-05	5.92052	hyper
ACOT2	14q24.3	0.00948089	3.48539	hyper	0.376519	1.09081	hyper
CMA1	14q12	0.00950459	-3.54129	hypo	0.00958691	-3.55414	hypo
LRRC3	21q22.3	0.00954964	3.46302	hyper	0.166511	1.78692	hyper
SYCP2	20q13.33	0.00955292	3.51268	hyper	0.0262856	-3.05427	hypo
PDE1C	7p14.3	0.00958132	3.46062	hyper	0.000484723	5.38429	hyper
CEP57	11q21	0.00958132	-3.44262	hypo	0.0166357	3.06589	hyper
COMT	22q11.21	0.00958842	3.44594	hyper	0.171262	-1.69634	hypo
GABRP	5q35.1	0.0096031	-3.53844	hypo	0.0287893	-2.83042	hypo
LAMB2	3p21.31	0.00963775	3.47815	hyper	0.0987831	2.10658	hyper
FGFR2	10q26.13	0.00963775	-3.47924	hypo	0.00540371	3.60301	hyper
USP28	11q23.2	0.00963775	-3.49927	hypo	0.655187	0.568453	hyper
IL17A	6p12.2	0.00968098	3.4512	hyper	0.0020776	-4.91164	hypo
LHFP	13q13.3	0.00971076	3.43937	hyper	0.585778	-0.68602	hypo
LCA5	6q14.1	0.00972186	3.46662	hyper	9.20262e-12	13.2967	hyper
TFCP2L1	2q14.2	0.00976012	3.43943	hyper	0.0802402	-2.11141	hypo
WDFY2	13q14.3	0.00976012	-3.49634	hypo	0.0542416	2.51304	hyper
FOXP3	23p11.23	0.00976012	-3.52068	hypo	0.235248	1.49327	hyper
MTMR2	11q21	0.00976442	-3.50882	hypo	0.0844278	2.305	hyper
RAB11A	15q22.31	0.00980729	3.47572	hyper	0.986014	-0.0201102	hypo
AQP12A	2q37.3	0.00981898	3.4271	hyper	0.00532238	-3.92025	hypo
CENPA	2p23.3	0.00983123	-3.43623	hypo	0.299327	-1.27219	hypo
OR8I2	11q11	0.00983123	3.46944	hyper	0.0170241	-3.38336	hypo
CAMK1G	1q32.2	0.00983235	-3.47535	hypo	0.0170029	3.00497	hyper
TNK2	3q29	0.0098525	3.51241	hyper	0.0208713	-3.02918	hypo
C19orf41	19q13.33	0.0098525	3.43244	hyper	0.00198913	-4.43583	hypo
LOC284194	17p11.2	0.00985633	-3.48269	hypo	0.696689	0.499417	hyper
KRT72	12q13.13	0.00985633	3.44391	hyper	0.00904084	-3.82525	hypo
C1orf32	1q24.1	0.00985933	-3.53696	hypo	0.776515	0.371727	hyper
BOC	3q13.2	0.00989689	-3.48004	hypo	2.59921e-24	18.0819	hyper
FLJ35220	17q25.3	0.00989689	3.49084	hyper	0.000848885	-4.34706	hypo
KCNE1	21q22.12	0.00991941	3.46247	hyper	0.299757	-1.25711	hypo
FMO2	1q24.3	0.00992537	3.48977	hyper	1.09046e-05	8.06478	hyper
NTRK2	9q21.33	0.00993796	-3.45202	hypo	0.0359548	2.46212	hyper
LOC645296	15q23	0.00993848	-3.44603	hypo	0.000313381	-5.35517	hypo
PEX3	6q24.2	0.00996441	3.49749	hyper	0.0370655	2.73352	hyper
CASP8	2q33.1	0.00996444	-3.49994	hypo	0.0928331	-1.95521	hypo
ZNF570	19q13.12	0.00996444	-3.50792	hypo	0.109923	-2.03764	hypo
RCC1	1p35.3	0.00997801	-3.44402	hypo	5.03924e-07	-6.8182	hypo
ARL5B	10p12.33	0.0100217	-3.44737	hypo	0.799493	-0.335751	hypo
WNT1	12q13.12	0.0100292	-3.44872	hypo	0.915812	-0.141131	hypo
OR1A1	17p13.3	0.0100352	3.44782	hyper	0.00190092	-5.48147	hypo
MGST3	1q24.1	0.0100368	-3.47525	hypo	0.000394691	6.17912	hyper
ZCCHC5	23q21.1	0.0100368	-3.47557	hypo	0.762411	0.397157	hyper
ZNF259	11q23.3	0.0100508	-3.4138	hypo	0.65987	0.556099	hyper
VPS37C	11q12.2	0.0100823	3.4406	hyper	9.07934e-05	-4.86739	hypo
RFNG	17q25.3	0.0100823	3.43771	hyper	0.292855	-1.29611	hypo
PHYHIP	8p21.3	0.0101415	3.41912	hyper	0.00134935	4.63498	hyper
CCDC13	3p22.1	0.0101661	3.44892	hyper	0.0328848	-2.64003	hypo
PIAS3	1q21.1	0.0102079	3.50122	hyper	0.358336	-1.13365	hypo
C4orf32	4q25	0.0102238	3.3928	hyper	0.000102968	6.86009	hyper
PROM2	2q11.1	0.0102335	3.46142	hyper	0.000440635	-5.74361	hypo
PNPLA7	9q34.3	0.0102335	3.44286	hyper	0.000471725	5.81867	hyper
GPR83	11q21	0.0102335	-3.40677	hypo	0.20262	1.6176	hyper
NDUFA4L2	12q13.3	0.0102335	-3.45566	hypo	0.0269716	-2.88477	hypo
CCR9	3p21.31	0.0102974	-3.45835	hypo	0.163752	-1.78675	hypo
SNCA	4q22.1	0.0102974	-3.44951	hypo	0.000584223	5.20374	hyper
LOC126147	19q13.33	0.010331	3.39568	hyper	0.302434	-1.28062	hypo
SH2D1B	1q23.3	0.0104359	-3.44061	hypo	0.000540045	-6.10952	hypo
RCHY1	4q21.1	0.0104565	-3.41089	hypo	0.000581799	4.78675	hyper
MEPCE	7q22.1	0.0104583	3.44438	hyper	0.198113	1.57988	hyper
IGBP1	23q13.1	0.0104713	3.38702	hyper	0.00686406	-3.81883	hypo
CCDC100	5q23.2	0.0104787	3.45714	hyper	7.1469e-06	8.06355	hyper
C4orf35	4q13.3	0.0104944	3.40191	hyper	0.00602963	-3.87392	hypo
ATP5J2	7q22.1	0.0105047	3.48563	hyper	0.00385336	-4.27587	hypo
RLN2	9p24.1	0.0105047	-3.45441	hypo	0.970779	-0.047069	hypo
C15orf2	15q11.2	0.0105047	3.45734	hyper	0.237859	-1.44672	hypo
SLC24A5	15q21.1	0.0105047	3.399	hyper	0.00738184	-3.39575	hypo
MUC4	3q29	0.0105215	3.42117	hyper	0.569034	-0.723178	hypo
IL13RA2	23q23	0.0105215	3.43772	hyper	0.0762565	2.36371	hyper
ZFR	5p13.3	0.0105574	-3.47002	hypo	4.20375e-06	7.79327	hyper
NPW	16p13.3	0.010581	-3.40302	hypo	0.0198126	2.80233	hyper
B3GNT3	19p13.11	0.010581	-3.43006	hypo	0.841808	0.266641	hyper
FSIP1	15q14	0.0105887	3.43895	hyper	0.808538	0.319385	hyper
RXRG	1q23.3	0.0106057	-3.45338	hypo	0.0518099	2.41524	hyper
IARS	9q22.31	0.0106057	-3.4086	hypo	0.00108275	5.74726	hyper
GNS	12q14.3	0.0106347	-3.44366	hypo	0.683078	0.524589	hyper
RUNDC1	17q21.31	0.0106347	3.42259	hyper	0.0179321	-3.51241	hypo
PDE4B	1p31.3	0.0106379	-3.46328	hypo	2.53569e-05	7.37911	hyper
SPRY1	4q28.1	0.0106379	-3.41197	hypo	5.33023e-06	7.58801	hyper
DICER1	14q32.13	0.0106379	3.44788	hyper	1.03332e-14	12.7445	hyper
C5orf30	5q21.1	0.0106586	3.41194	hyper	0.397907	1.04604	hyper
PCYT2	17q25.3	0.0106615	3.38582	hyper	0.0965263	2.12694	hyper
KIAA1147	7q34	0.0106779	3.40616	hyper	0.00664373	-3.94517	hypo
GPC1	2q37.3	0.0106873	3.43967	hyper	0.590802	-0.680782	hypo
LAPTM4B	8q22.1	0.0106873	-3.42102	hypo	0.0142046	-3.0902	hypo
ADAMTS8	11q24.3	0.0107113	-3.39222	hypo	0.702557	0.483998	hyper
SULT1A1	16p11.2	0.0107113	3.4409	hyper	0.000275713	-5.67922	hypo
PTPN13	4q21.3	0.0107298	3.38155	hyper	1.55188e-05	6.30593	hyper
CCDC86	11q12.2	0.0107307	-3.41652	hypo	0.245414	1.43353	hyper
TP53RK	20q13.12	0.0107327	3.37712	hyper	0.221888	1.49306	hyper
ZNF500	16p13.3	0.0107662	3.40558	hyper	0.304736	-1.21693	hypo
NFIB	9p22.3	0.0107737	-3.40933	hypo	6.25235e-07	9.71284	hyper
KLHL21	1p36.31	0.0107765	-3.40625	hypo	0.000175884	6.43844	hyper
MAPKAPK2	1q32.1	0.0108745	3.40069	hyper	0.00582219	-3.82102	hypo
RNF121	11q13.4	0.0108745	-3.39129	hypo	0.703403	-0.48927	hypo
JAK3	19p13.11	0.0108745	-3.4182	hypo	0.0931993	-2.1118	hypo
OR11H6	14q11.2	0.0108745	3.41679	hyper	0.0966834	-2.15921	hypo
SOST	17q21.31	0.0108745	3.36543	hyper	0.293576	-1.31225	hypo
FGD3	9q22.31	0.0109014	3.35898	hyper	0.256984	-1.43179	hypo
SFRS15	21q22.11	0.0109329	3.40363	hyper	0.269427	1.34118	hyper
OR2T35	1q44	0.0109866	3.37747	hyper	1.8804e-06	-8.57622	hypo
PNRC1	6q15	0.0110002	-3.35668	hypo	0.719487	0.458748	hyper
GDPD3	16p11.2	0.0110133	3.41107	hyper	0.718174	-0.462039	hypo
H3F3B	17q25.1	0.01102	3.39305	hyper	0.921107	0.133101	hyper
NFAT5	16q22.1	0.011031	-3.38801	hypo	0.000771826	5.0302	hyper
C11orf42	11p15.4	0.0110627	-3.41635	hypo	1.06411e-07	11.7505	hyper
TMED5	1p22.1	0.0110695	-3.4071	hypo	0.000583479	-6.16408	hypo
ANAPC2	9q34.3	0.0110697	3.41587	hyper	0.0286621	-3.10484	hypo
CCR7	17q21.2	0.0110697	-3.48438	hypo	0.0697518	2.15942	hyper
NXNL2	9q22.1	0.0110784	3.3695	hyper	0.000245466	-6.04814	hypo
ZBTB5	9p13.2	0.0111253	-3.35212	hypo	0.102139	2.07746	hyper
GPR50	23q28	0.0111253	3.43263	hyper	0.848887	0.249985	hyper
MOSPD2	23p22.2	0.0111407	3.35803	hyper	0.344969	-1.14688	hypo
MARCH7	2q24.2	0.0111928	3.41481	hyper	0.835941	0.275329	hyper
UNQ1940	7q33	0.0111955	-3.40395	hypo	8.00868e-09	9.83845	hyper
POLR2L	11p15.5	0.0112138	3.3806	hyper	2.29247e-10	9.30267	hyper
DEPDC1B	5q12.1	0.0112619	3.42035	hyper	0.943611	-0.0943455	hypo
KCNK6	19q13.2	0.0112819	3.45304	hyper	0.195867	1.55864	hyper
NPAS2	2q11.2	0.0112963	-3.42877	hypo	0.0203245	3.26599	hyper
ZPLD1	3q12.3	0.0113141	3.33541	hyper	0.239214	-1.51024	hypo
ADCYAP1	18p11.32	0.0113156	-3.40249	hypo	6.41535e-09	9.76205	hyper
PCDHGA6	5q31.3	0.0113263	3.43534	hyper	0.308916	1.26931	hyper
LOC134145	5p15.2	0.0113382	-3.38541	hypo	0.00476684	-3.9854	hypo
EIF1B	3p22.1	0.0113403	-3.39472	hypo	5.49971e-05	6.3513	hyper
TTC4	1p32.3	0.011364	3.37625	hyper	0.0691926	-2.44168	hypo
SNHG3-RCC1	1p35.3	0.011364	-3.4033	hypo	2.20769e-06	-9.1359	hypo
GDAP1L1	20q13.12	0.0113926	-3.42334	hypo	0.0520319	2.36743	hyper
TRIM35	8p21.2	0.0113971	-3.40325	hypo	0.000426504	5.75178	hyper
WDR69	2q36.3	0.011403	3.4479	hyper	1.09653e-06	-7.78166	hypo
FAM124B	2q36.2	0.0114096	-3.4402	hypo	0.0058089	-3.65169	hypo
PPAPDC3	9q34.13	0.0114169	3.35314	hyper	0.0334027	-2.77503	hypo
RBBP8	18q11.2	0.0114169	3.41068	hyper	0.492132	0.855654	hyper
MGC23985	5q33.1	0.0114973	-3.41443	hypo	0.00118639	-5.07999	hypo
TMEM64	8q21.3	0.0115328	-3.34888	hypo	4.5653e-06	8.83054	hyper
HCLS1	3q13.33	0.011539	-3.41986	hypo	0.000193829	6.18917	hyper
KCTD6	3p14.3	0.0115565	3.40349	hyper	0.00111809	4.3866	hyper
C10orf109	10p15.3	0.0115771	-3.42359	hypo	0.00206386	-4.12687	hypo
SNX25	4q35.1	0.0115793	3.42091	hyper	2.4015e-05	-6.87496	hypo
CHD1	5q21.1	0.0115793	3.4066	hyper	0.0188704	-3.32562	hypo
PHLPPL	16q22.3	0.0115793	3.4068	hyper	0.000304771	-5.98943	hypo
IKBKG	23q28	0.0116108	3.40729	hyper	0.100906	-2.01133	hypo
APOBEC3F	22q13.1	0.0116257	3.46359	hyper	0.443434	-0.934304	hypo
DOK7	4p16.2	0.0116362	3.35392	hyper	0.420186	-1.00548	hypo
POMGNT1	1p34.1	0.011653	3.35588	hyper	0.0199322	3.21576	hyper
IL6R	1q21.3	0.0117024	-3.43003	hypo	0.00817614	-3.85513	hypo
PLAT	8p11.21	0.0117962	3.33965	hyper	0.00410757	4.08332	hyper
GPR21	9q33.2	0.0118056	-3.37435	hypo	5.25596e-06	10.3476	hyper
C11orf31	11q12.1	0.0118135	-3.32849	hypo	0.146547	-1.85119	hypo
MRPL41	9q34.3	0.0118427	3.36925	hyper	0.00170762	-3.64503	hypo
ARHGEF1	19q13.2	0.0118427	-3.42802	hypo	0.558008	-0.737538	hypo
EDEM2	20q11.22	0.0118427	-3.37773	hypo	0.129592	-1.89757	hypo
HDAC10	22q13.33	0.0119086	3.35354	hyper	0.253563	-1.42591	hypo
MRTO4	1p36.13	0.0119735	-3.41257	hypo	0.159941	1.80041	hyper
PCDHB13	5q31.3	0.0119767	3.39959	hyper	0.121863	1.93729	hyper
TBC1D5	3p24.3	0.0119767	-3.39176	hypo	0.00044692	5.34231	hyper
TMEM45A	3q12.2	0.0119767	-3.35645	hypo	0.103482	-2.0585	hypo
ID4	6p22.3	0.0120331	-3.38968	hypo	0.386804	-1.07691	hypo
TACR1	2p13.1	0.0120746	-3.35196	hypo	0.291515	1.27206	hyper
COL23A1	5q35.3	0.0120896	-3.35371	hypo	1.04162e-05	8.48183	hyper
ATPBD3	19q13.33	0.0121402	3.41212	hyper	0.00182832	3.90339	hyper
IDUA	4p16.3	0.0121436	3.33297	hyper	0.00679378	-4.19069	hypo
TBC1D26	17p12	0.0121495	3.37209	hyper	0.813636	-0.312214	hypo
KRTAP5-10	11q13.4	0.0121718	-3.36778	hypo	0.213219	-1.58022	hypo
RNF126	19p13.3	0.0122059	3.38885	hyper	0.0174384	-2.97956	hypo
MPP4	2q33.1	0.0122257	3.34626	hyper	0.45924	-0.922539	hypo
ELN	7q11.23	0.0122257	-3.36721	hypo	0.478042	-0.863331	hypo
LRP2BP	4q35.1	0.012232	-3.40372	hypo	0.0634425	2.33088	hyper
DEGS1	1q42.11	0.0122322	-3.32182	hypo	0.782554	-0.356705	hypo
MAGEA12	23q28	0.0122322	3.3937	hyper	6.12946e-05	-6.82308	hypo
HMHA1	19p13.3	0.0122358	-3.35957	hypo	0.0490086	2.64086	hyper
ACSM5	16p12.3	0.0122365	-3.4412	hypo	0.220838	-1.54117	hypo
ABHD5	3p21.33	0.0122649	3.36362	hyper	0.652493	0.563018	hyper
PMVK	1q21.3	0.012267	3.35999	hyper	0.0118868	-3.32616	hypo
CD300A	17q25.1	0.0122818	-3.44463	hypo	0.00151525	-4.26178	hypo
SULT2B1	19q13.32	0.0122944	3.32418	hyper	0.00904084	-3.63974	hypo
FAM38B	18p11.22	0.0123351	-3.43179	hypo	0.0560214	-2.42138	hypo
NBPF15	1q21.1	0.0123391	3.37237	hyper	0.03431	-3.02715	hypo
PCDHA7	5q31.3	0.0123391	3.37891	hyper	0.0297113	2.59489	hyper
UBXD3	1p36.12	0.0123457	3.34087	hyper	0.589515	0.670474	hyper
SUPT7L	2p23.2	0.012423	-3.32434	hypo	0.0615902	-2.46464	hypo
TSPYL6	2p16.2	0.012444	3.38293	hyper	0.654047	-0.569627	hypo
BCAR3	1p22.1	0.0124765	3.37475	hyper	0.121863	1.88149	hyper
ABLIM3	5q33.1	0.0124872	3.31179	hyper	0.690774	-0.507152	hypo
C20orf117	20q11.23	0.0125062	3.35921	hyper	2.38066e-12	10.9849	hyper
LYPD1	2q21.2	0.0125165	-3.3594	hypo	0.105239	2.00062	hyper
GABRQ	23q28	0.0125165	3.35085	hyper	0.340157	-1.1752	hypo
PTEN	10q23.31	0.0125255	3.38813	hyper	4.83004e-07	9.62339	hyper
OR2T33	1q44	0.0125463	3.35208	hyper	0.000382177	-6.20751	hypo
PAX7	1p36.13	0.0125511	-3.41187	hypo	0.000208407	6.12255	hyper
PAX8	2q13	0.0125596	3.34421	hyper	0.516223	0.815537	hyper
ST6GALNAC6	9q34.11	0.0125706	3.35702	hyper	4.8285e-07	11.5557	hyper
TMBIM1	2q35	0.0125875	-3.3629	hypo	1.07001e-05	7.52211	hyper
ATP2B3	23q28	0.0125875	3.37406	hyper	0.869422	-0.217738	hypo
SHC1	1q21.3	0.0125876	3.32575	hyper	0.00640922	4.0677	hyper
HMX2	10q26.13	0.0125876	-3.38098	hypo	2.47566e-06	11.171	hyper
MTHFR	1p36.22	0.0126195	3.3942	hyper	0.334685	-1.18808	hypo
C4orf36	4q21.3	0.0126314	3.33644	hyper	0.0020776	3.57425	hyper
NDRG1	8q24.22	0.0126314	-3.36229	hypo	0.00365713	4.02219	hyper
JOSD3	11q21	0.0126314	-3.38772	hypo	0.15713	1.72942	hyper
ABAT	16p13.2	0.0127021	-3.40415	hypo	0.027585	-2.8554	hypo
ANXA9	1q21.2	0.0127413	3.37696	hyper	0.000215731	-4.75278	hypo
LAMA2	6q22.33	0.0127413	-3.31535	hypo	8.11467e-05	6.70506	hyper
UMODL1	21q22.3	0.0127419	3.31715	hyper	0.0521482	-2.47193	hypo
PIP5K1C	19p13.3	0.0127866	3.33675	hyper	0.869311	-0.217878	hypo
C17orf58	17q24.2	0.0127872	3.30109	hyper	4.21915e-05	-6.40763	hypo
RNASE1	14q11.2	0.0128082	-3.35577	hypo	0.000368881	5.15306	hyper
NANOS1	10q26.11	0.0128375	-3.37645	hypo	0.204904	1.55607	hyper
NGFR	17q21.33	0.0128375	-3.38011	hypo	0.0209649	-3.08903	hypo
OR4M1	14q11.2	0.0128375	3.34798	hyper	0.0584923	-2.30151	hypo
ZNF44	19p13.2	0.0128375	3.31248	hyper	0.237137	1.50742	hyper
ANGPTL2	9q33.3	0.0128475	-3.3746	hypo	0.000129441	6.84587	hyper
DPEP3	16q22.1	0.0128699	3.33564	hyper	2.27541e-07	-8.27865	hypo
PTGIS	20q13.13	0.0128778	-3.35081	hypo	4.02356e-05	8.27609	hyper
GABRA3	23q28	0.0128778	3.37483	hyper	0.935198	0.108151	hyper
HIST1H2AJ	6p22.1	0.0128851	-3.29488	hypo	0.0122144	-3.02117	hypo
DLL3	19q13.2	0.0128851	-3.30355	hypo	0.0309157	-2.89872	hypo
GPX5	6p22.1	0.0129135	3.36759	hyper	0.00609252	3.50789	hyper
CBX2	17q25.3	0.0129154	-3.29949	hypo	0.774147	-0.376506	hypo
NPAS4	11q13.1	0.0129422	-3.35004	hypo	0.154076	-1.72687	hypo
LRDD	11p15.5	0.0129536	3.35663	hyper	0.213224	-1.55861	hypo
SYK	9q22.2	0.0129536	-3.31494	hypo	0.0241146	-3.15485	hypo
C13orf33	13q12.3	0.0129536	-3.35047	hypo	0.312622	1.26056	hyper
OR7A17	19p13.12	0.0129654	3.34062	hyper	3.24611e-06	-8.47897	hypo
ACCN3	7q36.1	0.012985	3.29999	hyper	0.172821	-1.73063	hypo
LOC493869	5q11.2	0.0130075	3.33656	hyper	0.361824	-1.12864	hypo
CDC123	10p14	0.0130075	-3.42021	hypo	0.0117266	-3.16272	hypo
ALS2CR11	2q33.1	0.0130084	3.33088	hyper	0.647262	0.582705	hyper
THSD3	14q24.3	0.0130278	-3.3895	hypo	0.528411	0.785208	hyper
MED26	19p13.11	0.0130278	3.35792	hyper	0.676412	-0.535774	hypo
PAIP2	5q31.2	0.0130682	3.37369	hyper	0.23018	-1.53204	hypo
LCN1	9q34.3	0.0130913	3.27211	hyper	0.0290422	-2.88177	hypo
AK3L1	1p31.3	0.0131042	-3.32859	hypo	0.00830152	3.98013	hyper
LBX1	10q24.31	0.0131042	-3.34226	hypo	4.55033e-10	11.3842	hyper
[truncated: 1,486 more rows]

## Sheet: Table S4C
										Table S4C: DNA methylation data analysis - 4,545 gene promoters exhibited a DNA methylation level different in at least one molecular subtype
										ANOVA analysis + Tukey's range Test
Previous DNA methylation studies									Symbol	ERBB2-Basal		LuminalA-Basal		LuminalB-Basal		Normal-Basal		LuminalA-ERBB2		LuminalB-ERBB2		Normal-ERBB2		LuminalB-LuminalA		Normal-LuminalA		Normal-LuminalB		mRNA	Test on luminal B			Test on Basal			Test on ERBB2			Test on luminal A
Holm et al., 2010 (21)	Bediaga et al., 2010 (20)	Fackler et al., 2011 (Hyper ER+) (23)	Fackler et al., 2011 (Hyper ER-) (23)	Dedeurwaerder et al., 2011*	Hill et al.2011 (ERPR) (24)	Hill et al.2011 (Relapse) (24)	Jovanovic et al., 2010*	Park et al., 2012*		P adj (FDR)	Diff	P adj (FDR)	Diff	P adj (FDR)	Diff	P adj (FDR)	Diff	P adj (FDR)	Diff	P adj (FDR)	Diff	P adj (FDR)	Diff	P adj (FDR)	Diff	P adj (FDR)	Diff	P adj (FDR)	Diff	Correlation	LuminalB	Status Vs other subtype	Status vs Normal	Basal	Status Vs other subtype	Status vs Normal	ERBB2	Status Vs other subtype	Status vs Normal	LA	Status Vs other subtype	Status vs Normal
									DNALI1	0.213952	-0.289714	2.63452e-11	-0.644725	2.29311e-11	-0.739911	0.0114704	-0.572727	0.0313555	-0.355011	0.00296574	-0.450197	1	-0.283013	1	-0.0951863	1	0.071998	1	0.167184	-0.814632	FALSE	HYPO	0	FALSE	HYPER	0	FALSE	0	0	FALSE	0	0
									ZNF703	0.459559	-0.246194	1.1603e-08	-0.542067	4.00607e-10	-0.65851	0.125828	-0.470427	0.118902	-0.295873	0.00968707	-0.412316	1	-0.224233	1	-0.116443	1	0.07164	1	0.188083	-0.764274	FALSE	HYPO	0	FALSE	HYPER	0	FALSE	0	0	FALSE	0	0
									AGR3	1	-0.177637	1.22916e-08	-0.603047	6.05321e-10	-0.72446	1	-0.164131	0.0240272	-0.42541	0.00171644	-0.546823	1	0.0135065	1	-0.121413	1	0.438916	0.221933	0.560329	-0.75313	FALSE	HYPO	0	FALSE	HYPER	0	FALSE	0	0	FALSE	0	0
									FOXA1	1.00682e-06	-0.103607	2.49775e-11	-0.286942	2.29311e-11	-0.474928	0.01684	-0.918395	1	-0.183335	0.286669	-0.371321	1	0.185212	1	-0.187986	1	0.368547	0.468149	0.556533	-0.744523	FALSE	HYPO	0	TRUE	HYPER	HYPER	FALSE	0	0	FALSE	0	0
									PHYHD1	0.266426	-0.287717	3.7405e-06	-0.434286	0.00180687	-0.332161	0.0176108	-0.57931	0.910072	-0.146569	1	-0.0444433	1	-0.291592	1	0.102126	1	-0.145023	0.929564	-0.247149	-0.740841	FALSE	0	0	TRUE	HYPER	HYPER	FALSE	0	0	FALSE	0	0
									SCNN1A	0.00615807	-0.707894	3.66673e-11	-0.985651	2.20532e-07	-0.809333	0.33492	-0.572836	0.635253	-0.277757	1	-0.101439	1	0.135058	1	0.176318	1	0.412815	1	0.236497	-0.730671	FALSE	0	0	TRUE	HYPER	HYPER	FALSE	0	0	FALSE	HYPO	0
									SFT2D2	2.01839e-10	1.08956	2.49775e-11	1.33315	2.29311e-11	1.28449	3.8753e-10	1.07541	0.209834	0.243587	0.421595	0.194922	1	-0.014154	1	-0.0486647	1	-0.257741	1	-0.209076	-0.725431	FALSE	0	0	TRUE	HYPO	0	FALSE	0	0	FALSE	HYPER	0
									LOC400451	0.0978445	-0.319556	1.23189e-05	-0.374706	5.8783e-07	-0.47079	1	-0.185855	1	-0.0551504	0.726329	-0.151234	1	0.133701	1	-0.0960832	1	0.188852	0.602285	0.284935	-0.71344	FALSE	HYPO	0	TRUE	HYPER	HYPER	FALSE	0	0	FALSE	0	0
									ERBB2	1.93611e-08	-0.498642	0.00805554	-0.164375	0.0368192	-0.151167	0.773965	-0.1788	0.00120459	0.334267	0.0003621	0.347475	1	0.319842	1	0.0132078	1	-0.014425	1	-0.0276328	-0.711523	FALSE	0	0	FALSE	HYPER	0	FALSE	HYPO	0	FALSE	0	0
									ODC1	0.497502	0.268791	1.16697e-08	0.604511	6.45589e-10	0.722256	0.423638	0.397892	0.111829	0.33572	0.011204	0.453465	1	0.129102	1	0.117745	1	-0.206619	0.707952	-0.324363	-0.702906	FALSE	HYPER	0	FALSE	HYPO	0	FALSE	0	0	FALSE	0	0
									RHOH	1	-0.314174	0.0348054	-0.403052	0.000387537	-0.677658	1	-0.282955	1	-0.0888781	0.490607	-0.363484	1	0.0312194	1	-0.274606	1	0.120097	1	0.394703	-0.701118	FALSE	HYPO	0	TRUE	HYPER	HYPO	FALSE	0	0	FALSE	0	0
									ELF5	0.366613	0.226278	1.72115e-08	0.459742	9.70657e-07	0.433549	0.0787916	0.428925	0.184146	0.233464	0.26227	0.207272	1	0.202647	1	-0.0261929	1	-0.0308171	1	-0.00462412	-0.69624	FALSE	0	0	TRUE	HYPO	HYPO	FALSE	0	0	FALSE	HYPER	0
x									GRB7	1.3588e-07	-0.209446	0.0162087	-0.391475	0.0234624	-0.413471	1	-0.384367	0.00151391	0.81797	0.00164872	0.795975	1	0.825078	1	-0.0219956	1	0.00710774	1	0.0291033	-0.689518	FALSE	0	0	FALSE	HYPER	0	FALSE	HYPO	0	FALSE	0	0
							X		NAT1	1	-0.217341	0.000241583	-0.47488	0.198681	-0.244979	1	-0.242294	0.596567	-0.257539	1	-0.0276379	1	-0.0249533	0.869921	0.229901	1	0.232586	1	0.00268458	-0.688329	FALSE	0	0	TRUE	HYPER	HYPER	FALSE	0	0	TRUE	HYPO	0
									C1orf106	1	0.0312953	2.47902e-06	0.437285	0.000730212	0.351822	0.666927	0.307084	0.0127527	0.40599	0.0566713	0.320527	1	0.275789	1	-0.0854627	1	-0.130201	1	-0.044738	-0.685206	FALSE	0	0	FALSE	HYPO	0	FALSE	0	0	FALSE	HYPER	0
									CHI3L1	0.0249931	0.422963	2.63452e-11	0.689102	3.38666e-10	0.6789	0.03475	0.563889	0.218282	0.266139	0.223685	0.255937	1	0.140926	1	-0.0102017	1	-0.125213	1	-0.115011	-0.678795	FALSE	0	0	TRUE	HYPO	0	FALSE	0	0	FALSE	HYPER	0
									SLC16A5	1	-0.201588	0.00660563	-0.423307	0.359169	-0.239309	0.37053	-0.581197	0.940619	-0.221719	1	-0.0377216	1	-0.379609	1	0.183998	1	-0.15789	1	-0.341888	-0.6758	FALSE	0	0	TRUE	HYPER	HYPER	FALSE	0	0	TRUE	0	0
									CA12	0.806807	-0.211441	8.49048e-08	-0.533948	2.79021e-08	-0.607919	0.68534	-0.32134	0.10508	-0.322507	0.020916	-0.396478	1	-0.109899	1	-0.0739712	1	0.212608	0.799518	0.286579	-0.673967	FALSE	HYPO	0	FALSE	HYPER	0	FALSE	0	0	FALSE	0	0
									GREB1	0.361766	-0.237931	1.96989e-09	-0.516098	4.56379e-11	-0.636224	0.773965	-0.257792	0.098887	-0.278166	0.00507179	-0.398293	1	-0.019861	1	-0.120127	1	0.258305	0.354369	0.378432	-0.672846	FALSE	HYPO	0	FALSE	HYPER	0	FALSE	0	0	FALSE	0	0
									CELSR1	1	-0.151076	3.36006e-07	-0.652437	1.90198e-07	-0.731507	0.951772	-0.337096	0.0317333	-0.501361	0.00750537	-0.580431	1	-0.18602	1	-0.0790701	1	0.315341	0.711101	0.394411	-0.672317	FALSE	HYPO	0	FALSE	HYPER	0	FALSE	0	0	FALSE	0	0
									C19orf33	0.345941	-0.475486	1.30549e-06	-0.807553	1.01732e-07	-0.980261	0.989637	-0.428268	0.614826	-0.332068	0.122596	-0.504775	1	0.0472173	1	-0.172707	1	0.379285	0.611316	0.551993	-0.66083	FALSE	HYPO	0	TRUE	HYPER	HYPER	FALSE	0	0	FALSE	0	0
									COX6C	1	0.0680587	0.0813035	-0.233468	0.000137979	-0.475078	1	-0.0781767	0.249324	-0.301526	0.00412221	-0.543137	1	-0.146235	0.506332	-0.241611	1	0.155291	0.536103	0.396902	-0.651073	TRUE	HYPO	HYPO	FALSE	0	0	FALSE	HYPER	0	FALSE	0	0
									FBXO32	1	-0.0141344	0.810366	0.0615007	0.00212676	0.237037	1	0.0706352	1	0.0756351	0.0365772	0.251172	1	0.0847696	0.216954	0.175537	1	0.0091345	1	-0.166402	-0.648191	TRUE	HYPER	HYPER	FALSE	0	0	FALSE	HYPO	0	FALSE	0	0
									SIDT1	0.00202194	-0.458354	1.78403e-08	-0.486548	2.10954e-07	-0.487964	0.366706	-0.337579	1	-0.028194	1	-0.0296097	1	0.120775	1	-0.00141572	1	0.148969	1	0.150385	-0.642809	FALSE	0	0	TRUE	HYPER	0	FALSE	0	0	FALSE	HYPO	0
									MAML2	0.322061	0.32807	1.06113e-07	0.602749	1.33894e-09	0.762112	1	0.284359	0.354342	0.274679	0.0282629	0.434042	1	-0.0437113	1	0.159364	1	-0.31839	0.386284	-0.477754	-0.640071	FALSE	HYPER	0	FALSE	HYPO	0	FALSE	0	0	FALSE	0	0
									LPIN1	0.755676	0.207119	5.4191e-08	0.515217	1.02281e-08	0.597113	0.301385	0.39104	0.10059	0.308098	0.015622	0.389993	1	0.18392	1	0.0818955	1	-0.124177	1	-0.206073	-0.63849	FALSE	HYPER	0	FALSE	HYPO	0	FALSE	0	0	FALSE	0	0
									IRS1	0.249622	-0.319455	2.49775e-11	-0.867742	2.29311e-11	-0.917411	0.158212	-0.500034	0.00151391	-0.548288	0.000372307	-0.597957	1	-0.18058	1	-0.0496693	1	0.367708	0.40253	0.417377	-0.63738	FALSE	HYPO	0	FALSE	HYPER	0	FALSE	0	0	FALSE	0	0
									BTG2	1	-0.136404	3.96701e-07	-0.504834	0.000913388	-0.370339	0.276891	-0.421793	0.0476176	-0.36843	0.35901	-0.233935	1	-0.285389	1	0.134495	1	0.0830408	1	-0.0514541	-0.633365	FALSE	0	0	FALSE	HYPER	0	FALSE	0	0	FALSE	HYPO	0
									PDZK1	0.968368	-0.160487	2.21878e-05	-0.357129	0.00306717	-0.28485	0.566517	-0.294423	0.403629	-0.196641	0.907708	-0.124363	1	-0.133936	1	0.0722787	1	0.0627053	1	-0.00957338	-0.632012	FALSE	0	0	TRUE	HYPER	0	FALSE	0	0	FALSE	HYPO	0
									MLPH	0.15538	-0.33705	2.40131e-08	-0.555798	1.31638e-08	-0.621121	1	-0.204604	0.465537	-0.218748	0.157345	-0.284071	1	0.132446	1	-0.0653229	1	0.351194	0.386284	0.416517	-0.629879	FALSE	HYPO	0	TRUE	HYPER	0	FALSE	0	0	FALSE	0	0
									BIRC3	1	-0.0464024	0.022591	0.269846	0.0114209	0.322323	0.914472	0.29376	0.179769	0.316249	0.0623565	0.368726	1	0.340162	1	0.0524771	1	0.0239137	1	-0.0285634	-0.628996	FALSE	HYPER	0	TRUE	0	0	FALSE	HYPO	0	FALSE	0	0
									ST8SIA1	0.154475	0.235613	3.09373e-05	0.28739	0.000271956	0.279132	0.690642	0.221758	1	0.0517778	1	0.0435195	1	-0.0138543	1	-0.00825833	1	-0.0656321	1	-0.0573737	-0.627954	FALSE	0	0	TRUE	HYPO	HYPO	FALSE	0	0	FALSE	HYPER	0
									NFE2L3	0.0918713	0.35361	3.3808e-11	0.656114	1.16025e-10	0.68434	0.0787916	0.502134	0.107732	0.302504	0.0486952	0.33073	1	0.148524	1	0.0282264	1	-0.15398	1	-0.182206	-0.624875	FALSE	HYPER	0	FALSE	HYPO	0	FALSE	0	0	FALSE	0	0
									LBR	0.0125031	0.328398	2.49775e-11	0.558766	2.29311e-11	0.604674	0.0655873	0.385036	0.098887	0.230368	0.0231525	0.276276	1	0.0566381	1	0.0459077	1	-0.17373	0.679009	-0.219638	-0.623515	FALSE	HYPER	0	FALSE	HYPO	0	FALSE	0	0	FALSE	0	0
									CMBL	0.0273308	-0.518051	3.43215e-09	-0.711681	2.8931e-10	-0.842934	0.37053	-0.465576	0.857455	-0.19363	0.195424	-0.324883	1	0.0524745	1	-0.131253	1	0.246104	0.659482	0.377357	-0.622907	FALSE	HYPO	0	TRUE	HYPER	HYPER	FALSE	0	0	FALSE	0	0
									SUSD3	0.716235	-0.255158	0.000657324	-0.393476	0.00292156	-0.384846	0.773965	-0.343608	1	-0.138318	1	-0.129688	1	-0.0884505	1	0.00862986	1	0.0498674	1	0.0412376	-0.622157	FALSE	0	0	TRUE	HYPER	0	FALSE	0	0	FALSE	HYPO	0
									DUSP4	0.399502	-0.282599	9.7284e-07	-0.506302	0.0163025	-0.295409	0.773965	-0.314876	0.500881	-0.223704	1	-0.0128107	1	-0.0322767	0.606599	0.210893	1	0.191427	1	-0.019466	-0.616412	FALSE	0	0	TRUE	HYPER	HYPER	FALSE	0	0	FALSE	HYPO	0
									RAB11FIP1	1	-0.107427	0.0769044	-0.1569	3.02293e-05	-0.344759	1	-0.138747	1	-0.0494729	0.0946875	-0.237332	1	-0.03132	0.24888	-0.187859	1	0.0181529	0.8572	0.206012	-0.615285	TRUE	HYPO	HYPO	TRUE	HYPER	0	FALSE	0	0	FALSE	0	0
									TLR1	0.310288	0.335973	1.05631e-06	0.558707	2.77648e-10	0.816856	0.210273	0.52045	0.64335	0.222733	0.0143615	0.480883	1	0.184477	0.410798	0.25815	1	-0.0382567	0.940822	-0.296406	-0.613009	FALSE	HYPER	0	FALSE	HYPO	0	FALSE	0	0	FALSE	0	0
									DNAJC12	1	-0.00857087	6.60913e-06	-0.387381	5.86235e-06	-0.427664	1	-0.212837	0.0115124	-0.37881	0.00377648	-0.419093	1	-0.204266	1	-0.0402828	1	0.174544	0.976579	0.214827	-0.611514	FALSE	HYPO	0	FALSE	HYPER	0	FALSE	0	0	FALSE	0	0
									NPAS2	0.381687	0.262261	0.00616178	0.273475	0.000822379	0.356487	1	0.0871425	1	0.0112137	1	0.0942265	1	-0.175118	1	0.0830128	1	-0.186332	0.825115	-0.269345	-0.610862	FALSE	HYPER	0	TRUE	HYPO	0	FALSE	0	0	FALSE	0	0
									IGF1R	1	0.257892	0.322498	-0.222022	0.133252	-0.303222	1	-0.0733601	0.0978891	-0.479914	0.0273517	-0.561114	1	-0.331253	1	-0.0811997	1	0.148662	1	0.229862	-0.610846	TRUE	HYPO	0	FALSE	0	0	TRUE	HYPER	HYPER	FALSE	0	0
									GLRX	1	-0.0554851	0.000167461	0.414857	6.18205e-06	0.542625	1	0.247094	0.0145107	0.470342	0.000933365	0.59811	1	0.302579	1	0.127768	1	-0.167763	0.884157	-0.295531	-0.607729	FALSE	HYPER	0	FALSE	0	0	FALSE	HYPO	0	FALSE	0	0
									CXXC5	0.0622414	-0.486347	0.000374338	-0.440485	2.8979e-09	-0.805647	0.223712	-0.548992	1	0.0458625	0.243963	-0.3193	1	-0.0626448	0.123433	-0.365163	1	-0.108507	1	0.256655	-0.606967	FALSE	HYPO	0	TRUE	HYPER	HYPER	FALSE	0	0	FALSE	0	0
									CCR7	1	0.167785	2.34078e-05	0.483921	0.000126696	0.485573	0.551664	0.403378	0.221956	0.316136	0.185224	0.317788	1	0.235593	1	0.00165175	1	-0.0805423	1	-0.082194	-0.606929	FALSE	0	0	TRUE	HYPO	0	FALSE	0	0	FALSE	HYPER	0
									DBNDD2	1	0.0313699	0.000205589	-0.25548	0.00112388	-0.250193	1	-0.126525	0.0183399	-0.28685	0.0161648	-0.281562	1	-0.157895	1	0.00528726	1	0.128954	1	0.123667	-0.604279	FALSE	0	0	FALSE	0	0	FALSE	HYPER	0	FALSE	HYPO	0
									BCL2A1	0.0785347	0.324089	9.25527e-11	0.56108	2.2489e-08	0.517129	0.376289	0.32636	0.200823	0.236991	0.38242	0.19304	1	0.00227084	1	-0.0439511	1	-0.23472	1	-0.190769	-0.60198	FALSE	0	0	TRUE	HYPO	HYPO	FALSE	0	0	FALSE	HYPER	0
									SLC1A4	1	-0.175763	0.0533906	-0.260533	0.00123671	-0.428304	1	-0.163046	1	-0.0847694	0.472728	-0.25254	1	0.0127173	1	-0.167771	1	0.0974867	1	0.265258	-0.599627	TRUE	HYPO	HYPO	TRUE	HYPER	HYPO	FALSE	0	0	FALSE	0	0
									SLC39A6	1	0.0260965	5.07647e-05	-0.557379	3.26637e-07	-0.77038	1	-0.220228	0.016276	-0.583476	0.000372307	-0.796477	1	-0.246325	1	-0.213001	1	0.337151	0.413219	0.550152	-0.599585	FALSE	HYPO	0	FALSE	0	0	FALSE	HYPER	0	FALSE	0	0
									FOXC1	0.00310332	0.625789	3.61683e-10	0.773412	2.09784e-09	0.797775	0.0257859	0.717791	1	0.147623	0.930959	0.171987	1	0.0920019	1	0.0243635	1	-0.0556211	1	-0.0799846	-0.598852	FALSE	HYPER	0	TRUE	HYPO	HYPO	FALSE	0	0	FALSE	0	0
							X		ESR1	1	-0.0887223	3.92861e-05	-0.363569	2.93431e-05	-0.40695	1	-0.0243361	0.127261	-0.274846	0.0435837	-0.318227	1	0.0643862	1	-0.0433811	1	0.339232	0.386284	0.382614	-0.594732	FALSE	HYPO	0	FALSE	HYPER	0	FALSE	0	0	FALSE	0	0
x				X					TFF1	0.0993114	-0.377681	3.96701e-07	-0.518082	4.55695e-07	-0.564886	0.247992	-0.444372	1	-0.140402	0.676778	-0.187205	1	-0.066691	1	-0.0468036	1	0.0737106	1	0.120514	-0.593696	FALSE	HYPO	0	TRUE	HYPER	HYPO	FALSE	0	0	FALSE	0	0
									AZGP1	1	-0.13405	0.00505924	-0.307981	0.0279534	-0.279804	1	-0.114939	0.839575	-0.173931	0.959201	-0.145755	1	0.0191109	1	0.0281764	1	0.193042	1	0.164866	-0.593642	FALSE	0	0	TRUE	HYPER	0	FALSE	0	0	FALSE	HYPO	0
									RERG	1	-0.0490023	1.96812e-05	-0.34521	6.9938e-06	-0.399301	1	0.0218244	0.052405	-0.296208	0.011337	-0.350299	1	0.0708268	1	-0.0540906	1	0.367035	0.240883	0.421125	-0.59184	FALSE	HYPO	0	FALSE	0	0	FALSE	0	0	FALSE	0	0
							X		BCL2	1	-0.0608188	1.13278e-06	-0.397143	3.59941e-09	-0.535703	1	-0.194992	0.0216465	-0.336324	0.000372307	-0.474884	1	-0.134173	0.981094	-0.13856	1	0.202151	0.388088	0.340712	-0.591396	FALSE	HYPO	0	FALSE	HYPER	0	FALSE	0	0	FALSE	0	0
									ARL4C	1	0.18847	1.05934e-07	0.603911	2.55086e-06	0.583064	1	0.24742	0.0505287	0.415441	0.0524696	0.394594	1	0.0589502	1	-0.0208469	1	-0.356491	0.764717	-0.335644	-0.589598	FALSE	0	0	TRUE	HYPO	HYPER	FALSE	0	0	FALSE	HYPER	0
									C17orf37	4.85904e-05	-0.627052	0.592194	-0.114526	0.764073	-0.10218	0.498222	-0.352042	0.00151391	0.512526	0.00107809	0.524872	1	0.27501	1	0.0123465	1	-0.237515	0.940822	-0.249862	-0.587586	FALSE	0	0	FALSE	HYPER	0	TRUE	HYPO	HYPO	FALSE	0	0
									ACTR3B	0.0714164	0.299896	1.65098e-09	0.470898	4.41589e-08	0.461294	0.188163	0.356222	0.452086	0.171001	0.495171	0.161398	1	0.0563262	1	-0.00960389	1	-0.114675	1	-0.105071	-0.587449	FALSE	0	0	TRUE	HYPO	0	FALSE	0	0	FALSE	HYPER	0
									CLDN3	1	0.00725084	0.302377	-0.128624	0.002179	-0.287183	1	0.0425892	0.847886	-0.135875	0.0462433	-0.294434	1	0.0353384	0.730541	-0.158559	1	0.171214	0.415748	0.329772	-0.58639	TRUE	HYPO	HYPO	FALSE	0	0	FALSE	0	0	FALSE	0	0
									VSNL1	0.185139	0.488533	1.26876e-08	0.851523	2.32334e-11	1.15772	0.492133	0.542849	0.345867	0.36299	0.00776861	0.669187	1	0.0543156	0.575157	0.306198	1	-0.308674	0.393734	-0.614872	-0.586217	FALSE	HYPER	0	FALSE	HYPO	0	FALSE	0	0	FALSE	0	0
									MEX3A	0.249191	0.350818	5.4256e-05	0.455664	4.59001e-06	0.566335	1	0.201573	1	0.104846	0.627002	0.215517	1	-0.149245	1	0.110671	1	-0.254091	0.631807	-0.364762	-0.585461	FALSE	HYPER	0	TRUE	HYPO	HYPO	FALSE	0	0	FALSE	0	0
									ZNF626	0.288811	-0.279675	0.0931364	-0.189142	0.0424047	-0.235721	0.466845	-0.347326	1	0.090533	1	0.0439541	1	-0.0676502	1	-0.0465789	1	-0.158183	1	-0.111604	-0.585288	TRUE	0	0	TRUE	HYPER	HYPER	FALSE	0	0	FALSE	0	0
									GALNT6	0.288811	-0.324913	0.000498757	-0.383781	0.000326964	-0.433827	1	-0.188997	1	-0.0588672	1	-0.108914	1	0.135916	1	-0.0500464	1	0.194783	1	0.24483	-0.582953	FALSE	HYPO	0	TRUE	HYPER	HYPO	FALSE	0	0	FALSE	0	0
									ARL9	0.053197	0.51436	6.41701e-09	0.746328	3.36044e-05	0.578928	0.198171	0.582775	0.719232	0.231968	1	0.0645672	1	0.0684143	1	-0.1674	1	-0.163553	1	0.00384707	-0.580611	FALSE	0	0	TRUE	HYPO	0	FALSE	0	0	FALSE	HYPER	0
									GFRA1	1	-0.0351505	0.0164814	-0.224513	9.65278e-05	-0.375203	1	-0.104606	0.493251	-0.189363	0.0249029	-0.340052	1	-0.0694553	0.928946	-0.150689	1	0.119907	0.701989	0.270597	-0.579791	FALSE	HYPO	0	FALSE	HYPER	0	FALSE	0	0	FALSE	0	0
									SOX11	0.092904	0.615979	2.49775e-11	1.37772	2.29311e-11	1.51353	0.0787916	0.872673	0.00568195	0.761743	0.000890304	0.89755	1	0.256694	1	0.135807	1	-0.50505	0.441907	-0.640857	-0.578801	FALSE	HYPER	0	FALSE	HYPO	0	FALSE	0	0	FALSE	0	0
				X					C1orf64	1	-0.115729	0.0118897	-0.264692	0.905205	-0.0798744	1	-0.195109	0.93589	-0.148963	1	0.0358547	1	-0.0793798	0.784885	0.184818	1	0.0695835	1	-0.115234	-0.577757	FALSE	0	0	TRUE	HYPER	HYPO	FALSE	0	0	TRUE	HYPO	HYPO
									CD59	0.446756	0.245207	0.0968447	0.186564	0.00991771	0.279604	1	0.115943	1	-0.058643	1	0.0343963	1	-0.129265	1	0.0930393	1	-0.0706217	1	-0.163661	-0.577303	TRUE	HYPER	HYPER	TRUE	HYPO	HYPER	FALSE	0	0	FALSE	0	0
									KCTD6	1	0.00428262	0.000777663	-0.243854	2.53815e-05	-0.330028	1	-0.121965	0.071177	-0.248137	0.00512608	-0.334311	1	-0.126248	1	-0.0861737	1	0.121889	0.78961	0.208063	-0.576196	FALSE	HYPO	0	FALSE	HYPER	0	FALSE	0	0	FALSE	0	0
									PREX1	1	-0.0416395	0.00868357	-0.245897	0.0163284	-0.252544	1	-0.0618258	0.415576	-0.204257	0.344632	-0.210904	1	-0.0201864	1	-0.00664725	1	0.184071	1	0.190718	-0.574193	FALSE	HYPO	0	TRUE	HYPER	0	FALSE	0	0	FALSE	0	0
									TP53BP2	0.194119	0.413226	1.70022e-09	0.778823	4.99131e-10	0.881613	0.308284	0.519116	0.185099	0.365597	0.0363393	0.468387	1	0.10589	1	0.10279	1	-0.259707	0.812485	-0.362497	-0.573512	FALSE	HYPER	0	FALSE	HYPO	0	FALSE	0	0	FALSE	0	0
									C3orf15	1	0.0101383	0.00715654	-0.329963	7.58303e-05	-0.508239	1	-0.128076	0.176544	-0.340101	0.00878575	-0.518378	1	-0.138215	1	-0.178276	1	0.201887	0.618301	0.380163	-0.573273	FALSE	HYPO	0	FALSE	0	0	FALSE	HYPER	0	FALSE	0	0
									ENO1	1	0.224585	2.49775e-11	0.966171	4.03845e-09	0.806609	0.0192276	0.754799	0.00056486	0.741586	0.00507179	0.582024	1	0.530214	1	-0.159562	1	-0.211372	1	-0.0518099	-0.572643	FALSE	0	0	FALSE	HYPO	0	FALSE	0	0	FALSE	HYPER	0
									YBX1	0.603491	0.223799	2.49775e-11	0.695585	2.3926e-05	0.431697	0.363586	0.366882	0.0023596	0.471787	0.417978	0.207899	1	0.143084	0.133241	-0.263888	1	-0.328703	1	-0.0648151	-0.572462	FALSE	0	0	FALSE	HYPO	0	FALSE	0	0	FALSE	HYPER	0
									MUC1	0.32469	-0.29427	1.31104e-09	-0.630443	1.21552e-06	-0.540686	0.749707	-0.314435	0.0971411	-0.336173	0.326133	-0.246416	1	-0.020165	1	0.0897568	1	0.316008	1	0.226251	-0.569781	FALSE	0	0	TRUE	HYPER	0	FALSE	0	0	FALSE	HYPO	0
									TFF3	0.345253	-0.265274	1.50344e-05	-0.403069	0.00103203	-0.344345	0.983551	-0.240502	0.951236	-0.137796	1	-0.0790709	1	0.024772	1	0.0587246	1	0.162568	1	0.103843	-0.569274	FALSE	0	0	TRUE	HYPER	HYPER	FALSE	0	0	FALSE	HYPO	0
		X							CDCA7	1	0.100387	9.21898e-10	0.597679	4.86179e-08	0.573867	0.250285	0.414207	0.00177077	0.497292	0.00316006	0.473479	1	0.31382	1	-0.0238121	1	-0.183472	1	-0.15966	-0.568993	FALSE	0	0	FALSE	HYPO	0	FALSE	0	0	FALSE	HYPER	0
									INDO	0.324193	0.203362	2.55791e-09	0.425012	9.82281e-11	0.51556	0.359987	0.278348	0.11735	0.221651	0.00878575	0.312198	1	0.0749869	1	0.0905478	1	-0.146664	0.576899	-0.237211	-0.568749	FALSE	HYPER	0	FALSE	HYPO	0	FALSE	0	0	FALSE	0	0
									TM4SF1	1	0.152527	1	-0.0379281	0.0391297	0.359503	1	0.255837	1	-0.190455	0.911681	0.206976	1	0.10331	0.136142	0.397431	1	0.293765	1	-0.103666	-0.566626	TRUE	HYPER	HYPER	TRUE	0	0	FALSE	0	0	FALSE	HYPO	0
									LY75	0.876328	0.206264	0.024992	0.249844	0.00130705	0.369073	1	0.222918	1	0.0435802	0.829994	0.162809	1	0.0166538	1	0.119229	1	-0.0269264	1	-0.146155	-0.565986	FALSE	HYPER	0	TRUE	HYPO	0	FALSE	0	0	FALSE	0	0
									KLRG2	1	0.107542	5.2277e-05	0.382724	0.00105018	0.348352	1	0.121106	0.179684	0.275181	0.269968	0.24081	1	0.0135639	1	-0.0343717	1	-0.261618	1	-0.227246	-0.565607	FALSE	0	0	TRUE	HYPO	HYPO	FALSE	0	0	FALSE	HYPER	0
x	x								FGF2	1	0.0705604	0.052081	0.166337	0.000648505	0.285534	1	0.021723	1	0.0957762	0.158382	0.214974	1	-0.0488374	1	0.119197	1	-0.144614	0.536103	-0.263811	-0.562951	TRUE	HYPER	HYPER	TRUE	HYPO	HYPER	FALSE	0	0	FALSE	0	0
									TBC1D9	0.546228	-0.268535	1.15233e-06	-0.521302	1.84356e-06	-0.561231	0.544007	-0.380236	0.393872	-0.252766	0.200977	-0.292696	1	-0.1117	1	-0.0399298	1	0.141066	1	0.180996	-0.562202	FALSE	HYPO	0	TRUE	HYPER	HYPER	FALSE	0	0	FALSE	0	0
									PITX1	1	0.0378514	0.00977894	0.316509	0.00205373	0.403898	0.987635	0.296356	0.363135	0.278657	0.0942266	0.366046	1	0.258505	1	0.0873893	1	-0.0201522	1	-0.107542	-0.561814	FALSE	HYPER	0	TRUE	HYPO	HYPO	FALSE	0	0	FALSE	0	0
									BCAS1	0.057516	-0.346855	4.47287e-05	-0.351873	5.78091e-06	-0.428341	1	-0.139397	1	-0.00501729	1	-0.0814861	1	0.207458	1	-0.0764688	1	0.212476	0.586351	0.288944	-0.561114	FALSE	HYPO	0	TRUE	HYPER	HYPO	FALSE	0	0	FALSE	0	0
									CD28	1	-0.0224892	6.24345e-07	0.348015	5.31008e-05	0.311164	0.851352	0.199954	0.00151391	0.370504	0.00442257	0.333654	1	0.222443	1	-0.0368507	1	-0.148061	1	-0.111211	-0.560104	FALSE	0	0	FALSE	0	0	FALSE	HYPO	0	FALSE	HYPER	0
									PTPN13	1	-0.118101	0.115676	-0.224329	0.00769282	-0.357058	1	-0.116204	1	-0.106229	0.520492	-0.238958	1	0.00189653	1	-0.132729	1	0.108125	1	0.240854	-0.558559	TRUE	HYPO	0	TRUE	HYPER	HYPER	FALSE	0	0	FALSE	0	0
									MKI67	1	-0.0174985	6.82741e-08	0.588321	0.524149	0.149828	0.757554	0.334209	0.00131937	0.605819	0.865207	0.167327	1	0.351707	0.00750403	-0.438492	1	-0.254112	1	0.184381	-0.556668	FALSE	0	0	FALSE	0	0	FALSE	HYPO	0	TRUE	HYPER	0
									MTL5	1	-0.112043	0.000403967	-0.385904	9.682e-08	-0.631412	0.980622	-0.278081	0.302759	-0.273861	0.00412221	-0.519369	1	-0.166039	0.390977	-0.245508	1	0.107822	0.611316	0.353331	-0.555532	FALSE	HYPO	0	FALSE	HYPER	0	FALSE	0	0	FALSE	0	0
									CIB1	5.37294e-09	-0.972217	8.27605e-10	-0.69006	8.00053e-08	-0.648446	0.328511	-0.445511	0.29231	0.282157	0.138821	0.323771	1	0.526706	1	0.0416134	1	0.244549	1	0.202935	-0.554943	FALSE	0	0	TRUE	HYPER	0	FALSE	HYPO	0	FALSE	0	0
									FLJ45983	1	-0.126209	0.000597541	-0.678802	0.0003011	-0.781739	1	-0.399941	0.196961	-0.552593	0.0651146	-0.65553	1	-0.273732	1	-0.102937	1	0.278861	1	0.381798	-0.554691	FALSE	HYPO	0	TRUE	HYPER	HYPER	FALSE	0	0	FALSE	0	0
									WFS1	0.156467	-0.316484	6.8842e-08	-0.503263	5.27537e-05	-0.413737	0.689567	-0.299371	0.596507	-0.186779	1	-0.0972525	1	0.017113	1	0.0895262	1	0.203892	1	0.114365	-0.5539	FALSE	0	0	TRUE	HYPER	HYPER	FALSE	0	0	FALSE	HYPO	0
									DNAJA4	0.928616	-0.183209	5.38586e-05	-0.379231	2.86635e-08	-0.573793	1	-0.137239	0.545849	-0.196022	0.0150846	-0.390584	1	0.0459697	0.5674	-0.194562	1	0.241992	0.347828	0.436554	-0.551234	FALSE	HYPO	0	FALSE	HYPER	0	FALSE	0	0	FALSE	0	0
									MFSD7	0.094269	-0.347635	7.88812e-06	-0.412288	1.65026e-05	-0.437871	0.749707	-0.285797	1	-0.0646531	1	-0.090236	1	0.0618382	1	-0.0255829	1	0.126491	1	0.152074	-0.548965	FALSE	HYPO	0	TRUE	HYPER	HYPER	FALSE	0	0	FALSE	0	0
									SLC9A3R1	0.686302	-0.281194	0.0832872	-0.253077	0.0158167	-0.350891	1	0.00529743	1	0.0281174	1	-0.0696974	1	0.286491	1	-0.0978148	1	0.258374	0.79064	0.356189	-0.548377	TRUE	HYPO	HYPO	TRUE	0	0	FALSE	0	0	FALSE	0	0
									SLFN11	1	-0.0821577	0.00417151	0.556107	0.000157007	0.778252	1	0.327019	0.0777601	0.638265	0.00629056	0.86041	1	0.409177	1	0.222145	1	-0.229088	1	-0.451233	-0.548202	FALSE	HYPER	0	FALSE	0	0	FALSE	HYPO	0	FALSE	0	0
									DSC3	0.00295653	0.592245	1.35917e-08	0.648379	2.80763e-10	0.803841	0.773965	0.341712	1	0.0561347	0.653172	0.211596	1	-0.250533	1	0.155462	1	-0.306667	0.397407	-0.462129	-0.547845	FALSE	HYPER	0	TRUE	HYPO	0	FALSE	0	0	FALSE	0	0
									RBPMS	1	-0.23168	0.000938582	-0.436659	0.409196	-0.199143	0.367847	-0.508021	0.890946	-0.204979	1	0.0325372	1	-0.276341	0.823796	0.237516	1	-0.0713618	1	-0.308878	-0.547741	FALSE	0	0	TRUE	HYPER	HYPER	FALSE	0	0	TRUE	0	0
									IGHMBP2	0.685645	-0.367029	4.18333e-06	-0.734695	3.07102e-09	HYPO,05279356140025	0.210273	-0.725856	0.420297	-0.367666	0.0118849	-0.685764	1	-0.358827	0.655993	-0.318098	1	0.00883866	1	0.326937	-0.547174	FALSE	HYPO	0	FALSE	HYPER	0	FALSE	0	0	FALSE	0	0
									CITED4	0.280886	0.338066	0.263436	0.181373	0.00145484	0.402713	1	0.122155	0.99399	-0.156693	1	0.0646475	1	-0.21591	0.663018	0.221341	1	-0.0592171	0.97362	-0.280558	-0.546713	TRUE	HYPER	HYPER	TRUE	HYPO	0	FALSE	0	0	FALSE	0	0
									ASS1	1	-0.00729762	1	0.0207095	0.00628502	0.251123	1	-0.00646435	1	0.0280071	0.0801821	0.258421	1	0.000833269	0.133241	0.230414	1	-0.0271738	0.62921	-0.257588	-0.545735	TRUE	HYPER	HYPER	TRUE	HYPO	0	FALSE	0	0	FALSE	0	0
									C4orf18	4.85904e-05	-0.92232	2.49775e-11	HYPO,1666544967737	2.29311e-11	HYPO,18975002894268	0.00225975	HYPO,00292422032494	0.800632	-0.244334	0.649666	-0.26743	1	-0.0806038	1	-0.0230955	1	0.16373	1	0.186826	-0.544354	FALSE	HYPO	0	TRUE	HYPER	HYPER	FALSE	0	0	FALSE	0	0
									AMD1	1	0.116081	3.50997e-07	0.453593	0.0061267	0.281976	0.539282	0.316059	0.0421767	0.337512	0.659136	0.165895	1	0.199978	0.717328	-0.171618	1	-0.137534	1	0.0340836	-0.543525	FALSE	0	0	FALSE	HYPO	0	FALSE	0	0	FALSE	HYPER	0
									CAPN9	0.0104599	-0.396397	3.01462e-07	-0.42703	3.73036e-05	-0.378034	0.210273	-0.377556	1	-0.0306326	1	0.0183633	1	0.0188415	1	0.0489959	1	0.0494741	1	0.000478137	-0.543351	FALSE	0	0	TRUE	HYPER	HYPO	FALSE	0	0	FALSE	HYPO	0
									BCAR3	1	-0.078312	0.0132159	-0.243436	0.0573262	-0.222081	0.745276	-0.285657	0.745164	-0.165124	0.851534	-0.143769	1	-0.207345	1	0.0213559	1	-0.0422207	1	-0.0635766	-0.54296	FALSE	0	0	TRUE	HYPER	HYPER	FALSE	0	0	TRUE	0	0
									GSTA4	0.375642	0.283935	0.000321343	0.372529	0.0751249	0.23656	1	0.213828	1	0.0885933	1	-0.0473748	1	-0.0701069	1	-0.135968	1	-0.1587	1	-0.0227321	-0.542074	FALSE	0	0	TRUE	HYPO	HYPER	FALSE	0	0	TRUE	HYPER	HYPER
									ELP2	1	-0.143681	7.77983e-08	-0.546204	4.00607e-10	-0.710454	0.809568	-0.298606	0.0293775	-0.402523	0.00064436	-0.566773	1	-0.154925	1	-0.16425	1	0.247598	0.401646	0.411848	-0.541935	FALSE	HYPO	0	FALSE	HYPER	0	FALSE	0	0	FALSE	0	0
									NDRG1	1	0.109389	0.000984064	0.34873	0.000506337	0.401644	1	0.181538	0.413753	0.239341	0.171079	0.292255	1	0.0721488	1	0.0529142	1	-0.167192	1	-0.220106	-0.541762	FALSE	HYPER	0	TRUE	HYPO	0	FALSE	0	0	FALSE	0	0
									NANOS1	1	-0.0874213	0.0133259	0.173298	0.024409	0.178026	1	0.161703	0.0293775	0.260719	0.0190779	0.265447	1	0.249124	1	0.004728	1	-0.0115955	1	-0.0163235	-0.540524	FALSE	HYPER	0	FALSE	0	0	FALSE	HYPO	0	FALSE	0	0
									RNF145	0.344134	0.29498	0.000681457	0.358675	5.02581e-05	0.462989	1	0.259324	1	0.0636951	0.816157	0.168009	1	-0.0356556	1	0.104314	1	-0.0993507	1	-0.203665	-0.538775	FALSE	HYPER	0	TRUE	HYPO	0	FALSE	0	0	FALSE	0	0
									NLRC5	1	0.00418734	0.00790473	0.278978	0.00611145	0.315392	1	0.156168	0.221159	0.274791	0.10089	0.311205	1	0.151981	1	0.0364135	1	-0.12281	1	-0.159224	-0.537954	FALSE	HYPER	0	TRUE	HYPO	HYPO	FALSE	0	0	FALSE	0	0
									LONRF2	0.414011	0.341422	0.0171521	-0.324118	0.00723467	-0.393809	1	-0.0541695	0.00151391	-0.66554	0.000372307	-0.735231	1	-0.395591	1	-0.0696908	1	0.269949	0.887218	0.33964	-0.536307	FALSE	HYPO	0	FALSE	0	0	FALSE	HYPER	0	FALSE	0	0
									SOSTDC1	0.721872	0.233999	0.000657324	0.361914	0.00136425	0.376739	0.778556	0.312968	1	0.127915	0.972372	0.142739	1	0.0789686	1	0.0148246	1	-0.0489464	1	-0.0637709	-0.533983	FALSE	HYPER	0	TRUE	HYPO	HYPER	FALSE	0	0	FALSE	0	0
									HIVEP2	1	-0.0647815	2.33865e-05	0.469001	0.0698151	0.259743	1	0.137287	0.00400675	0.533782	0.145105	0.324525	1	0.202069	0.772617	-0.209258	1	-0.331714	1	-0.122456	-0.532602	FALSE	0	0	FALSE	0	0	FALSE	HYPO	0	TRUE	HYPER	HYPER
									CD38	0.736421	0.397672	1.33193e-07	0.945616	6.05321e-10	1.23826	0.627086	0.605042	0.138714	0.547943	0.00512608	0.840589	1	0.20737	1	0.292646	1	-0.340573	0.536103	-0.63322	-0.532554	FALSE	HYPER	0	FALSE	HYPO	0	FALSE	0	0	FALSE	0	0
									EN1	0.0249931	0.634631	4.60849e-05	0.586977	5.66897e-05	0.638277	0.478399	0.531641	1	-0.0476547	1	0.00364608	1	-0.102991	1	0.0513008	1	-0.0553359	1	-0.106637	-0.532174	FALSE	0	0	TRUE	HYPO	HYPO	FALSE	HYPER	0	FALSE	0	0
									CHD1	1	-0.0691492	0.00040132	-0.284423	0.0016322	-0.282382	0.8777	-0.221226	0.235151	-0.215274	0.213292	-0.213233	1	-0.152077	1	0.00204065	1	0.0631968	1	0.0611562	-0.531974	FALSE	0	0	TRUE	HYPER	0	FALSE	0	0	FALSE	HYPO	0
									RHOB	1	-0.137858	1.07977e-05	-0.541171	4.7519e-05	-0.552548	1	-0.250787	0.10059	-0.403313	0.0660078	-0.41469	1	-0.112929	1	-0.0113769	1	0.290384	1	0.301761	-0.531477	FALSE	HYPO	0	TRUE	HYPER	HYPER	FALSE	0	0	FALSE	0	0
									H2AFJ	1	0.109059	1	-0.0349025	0.0022105	-0.482056	1	0.101244	1	-0.143962	0.0126902	-0.591115	1	-0.00781488	0.0731594	-0.447154	1	0.136147	0.386284	0.583301	-0.530816	TRUE	HYPO	HYPO	FALSE	0	0	FALSE	HYPER	0	FALSE	0	0
									CSTA	1	0.0423131	0.00369586	0.231059	0.0584169	0.1838	1	0.0627208	0.335793	0.188746	0.66609	0.141487	1	0.0204077	1	-0.0472588	1	-0.168338	1	-0.121079	-0.530528	FALSE	0	0	TRUE	HYPO	0	FALSE	0	0	TRUE	HYPER	HYPER
									FOXM1	0.736421	0.151823	8.42621e-06	0.303582	0.268206	0.120892	0.69134	0.219367	0.461432	0.151759	1	-0.0309313	1	0.0675437	0.180962	-0.18269	1	-0.0842153	1	0.098475	-0.530419	FALSE	0	0	TRUE	HYPO	HYPO	FALSE	0	0	TRUE	HYPER	HYPO
									MLZE	1	0.183629	0.000120275	0.413165	0.0645513	0.253186	0.806998	0.316321	0.508069	0.229536	1	0.0695566	1	0.132691	1	-0.159979	1	-0.0968441	1	0.0631349	-0.530216	FALSE	0	0	TRUE	HYPO	HYPO	FALSE	0	0	TRUE	HYPER	0
									RAB40C	0.584141	-0.175285	5.85198e-07	-0.358018	4.37803e-06	-0.360594	1	-0.0350691	0.299726	-0.182733	0.254322	-0.185309	1	0.140216	1	-0.0025759	1	0.322949	0.352282	0.325525	-0.529891	FALSE	0	0	TRUE	HYPER	0	FALSE	0	0	FALSE	HYPO	0
									DECR1	1	0.00684415	0.831616	0.107175	0.00225438	0.426023	1	-0.0554809	1	0.100331	0.0598209	0.419179	1	-0.0623251	0.213005	0.318848	1	-0.162656	0.441907	-0.481504	-0.529754	TRUE	HYPER	HYPER	TRUE	0	0	FALSE	0	0	FALSE	0	0
									NFIB	0.625612	0.421284	0.000780036	0.607249	0.0344337	0.460077	1	0.314644	1	0.185965	1	0.0387929	1	-0.10664	1	-0.147172	1	-0.292605	1	-0.145433	-0.529028	FALSE	0	0	TRUE	HYPO	HYPER	FALSE	0	0	FALSE	HYPER	0
									SIT1	0.685609	-0.167988	0.888822	0.0568749	0.116139	0.156347	1	0.0480722	0.135024	0.224863	0.00884088	0.324335	1	0.21606	1	0.0994726	1	-0.00880266	1	-0.108275	-0.52863	TRUE	HYPER	HYPER	FALSE	0	0	TRUE	HYPO	0	FALSE	0	0
									CHST10	1	0.114334	0.231842	-0.158779	0.0387163	-0.242409	0.818115	-0.277344	0.186601	-0.273113	0.0328064	-0.356743	1	-0.391679	1	-0.0836295	1	-0.118565	1	-0.0349357	-0.528487	TRUE	0	0	FALSE	0	0	FALSE	HYPER	0	FALSE	0	0
									SLC16A1	0.0978445	0.726914	7.88812e-06	0.869801	9.40804e-08	1.1452	0.601129	0.666868	1	0.142887	0.473434	0.418284	1	-0.060046	1	0.275397	1	-0.202933	1	-0.47833	-0.528122	FALSE	HYPER	0	TRUE	HYPO	0	FALSE	0	0	FALSE	0	0
									NDRG2	0.251771	0.234054	0.0487309	0.169317	0.0106903	0.225604	1	0.0577221	1	-0.0647364	1	-0.0084498	1	-0.176332	1	0.0562866	1	-0.111595	1	-0.167882	-0.527774	FALSE	0	0	TRUE	HYPO	HYPER	FALSE	HYPER	0	FALSE	0	0
									EPSTI1	1	-0.15613	0.379126	0.215566	0.092998	0.332591	1	-0.0425822	0.326908	0.371695	0.0773491	0.48872	1	0.113547	1	0.117025	1	-0.258148	0.967213	-0.375173	-0.527753	FALSE	HYPER	0	FALSE	0	0	FALSE	HYPO	0	FALSE	0	0
									DSC2	0.857989	0.216507	0.000560887	0.368713	3.41894e-05	0.47973	0.386635	0.408066	0.968774	0.152206	0.287779	0.263223	1	0.191559	1	0.111017	1	0.039353	1	-0.0716645	-0.527747	FALSE	HYPER	0	TRUE	HYPO	0	FALSE	0	0	FALSE	0	0
									KRT18	0.0993114	-0.330638	5.2594e-08	-0.489611	1.52257e-09	-0.600848	1	-0.200045	0.757954	-0.158973	0.121181	-0.27021	1	0.130593	1	-0.111237	1	0.289565	0.354369	0.400803	-0.526834	FALSE	HYPO	0	TRUE	HYPER	0	FALSE	0	0	FALSE	0	0
									THRSP	0.229274	-0.408243	0.00441851	-0.383562	9.53991e-05	-0.555984	0.752766	-0.398115	1	0.0246811	1	-0.147741	1	0.0101278	1	-0.172422	1	-0.0145533	1	0.157868	-0.52678	FALSE	HYPO	0	TRUE	HYPER	0	FALSE	0	0	FALSE	0	0
									TMEM64	0.901821	0.251388	0.00533456	0.369113	0.0861873	0.285523	1	0.0960833	1	0.117726	1	0.0341355	1	-0.155304	1	-0.0835904	1	-0.27303	1	-0.18944	-0.526576	FALSE	0	0	TRUE	HYPO	HYPER	FALSE	0	0	TRUE	HYPER	HYPER
									PERLD1	0.000171828	-0.428447	0.591106	-0.0828571	0.596652	-0.08992	1	-0.03576	0.00290496	0.34559	0.00412221	0.338527	1	0.392687	1	-0.00706289	1	0.0470971	1	0.05416	-0.525115	FALSE	0	0	FALSE	HYPER	0	TRUE	HYPO	HYPO	FALSE	0	0
									COTL1	0.863238	0.193381	0.00385695	0.284695	0.000290567	0.380806	1	0.0503177	1	0.091314	0.580086	0.187425	1	-0.143063	1	0.0961111	1	-0.234377	0.541516	-0.330488	-0.524752	FALSE	HYPER	0	TRUE	HYPO	HYPO	FALSE	0	0	FALSE	0	0
									MALL	1	0.114799	0.00751843	0.233595	0.00665083	0.260413	0.906646	0.225817	0.974797	0.118796	0.727301	0.145614	1	0.111018	1	0.0268184	1	-0.00777712	1	-0.0345955	-0.524679	FALSE	HYPER	0	TRUE	HYPO	0	FALSE	0	0	FALSE	0	0
									MGC21874	1	-0.191215	1.75127e-07	-0.70312	6.45589e-10	-0.927121	0.868743	-0.378459	0.0419089	-0.511904	0.000932206	-0.735906	1	-0.187244	1	-0.224002	1	0.32466	0.397407	0.548662	-0.521306	FALSE	HYPO	0	FALSE	HYPER	0	FALSE	0	0	FALSE	0	0
									SYCP2	1	-0.137913	0.0191101	-0.345621	7.30319e-05	-0.597005	1	-0.310886	0.927876	-0.207708	0.0660078	-0.459092	1	-0.172972	0.819499	-0.251384	1	0.0347356	1	0.28612	-0.521265	FALSE	HYPO	0	TRUE	HYPER	0	FALSE	0	0	FALSE	0	0
									VPS37B	1	0.0586945	0.00042596	0.323712	2.64936e-05	0.419287	1	0.174229	0.175879	0.265018	0.021499	0.360592	1	0.115534	1	0.0955743	1	-0.149483	0.881216	-0.245058	-0.520516	FALSE	HYPER	0	FALSE	HYPO	0	FALSE	0	0	FALSE	0	0
									CRIP1	0.529107	-0.267718	0.00145741	-0.34653	0.00231338	-0.366675	1	-0.0234815	1	-0.0788118	1	-0.0989575	1	0.244237	1	-0.0201457	1	0.323048	0.631297	0.343194	-0.520179	FALSE	HYPO	0	TRUE	HYPER	0	FALSE	0	0	FALSE	0	0
									C10orf141	1	-0.132001	0.666594	-0.113128	0.00106188	-0.381048	1	-0.143906	1	0.0188732	0.334533	-0.249047	1	-0.0119045	0.213005	-0.26792	1	-0.0307778	1	0.237143	-0.51935	TRUE	HYPO	HYPO	TRUE	HYPER	0	FALSE	0	0	FALSE	0	0
									SLC7A2	1	-0.126766	0.00011795	-0.278936	0.00021667	-0.295844	1	-0.132028	0.532478	-0.152169	0.362168	-0.169078	1	-0.00526165	1	-0.0169086	1	0.146908	1	0.163816	-0.519037	FALSE	HYPO	0	TRUE	HYPER	0	FALSE	0	0	FALSE	0	0
									SERPINA3	1	-0.156123	0.000107604	-0.470153	0.0175834	-0.341332	1	-0.216506	0.279821	-0.31403	0.871547	-0.185208	1	-0.0603822	1	0.128822	1	0.253648	1	0.124826	-0.519013	FALSE	0	0	TRUE	HYPER	0	FALSE	0	0	FALSE	HYPO	0
									ZFP36L2	1	-0.054178	1	0.0336887	0.0242019	0.23767	1	-2.94694e-05	1	0.0878667	0.069547	0.291848	1	0.0541485	0.353949	0.203981	1	-0.0337182	0.874727	-0.2377	-0.518571	TRUE	HYPER	HYPER	TRUE	0	0	FALSE	HYPO	0	FALSE	0	0
									CUEDC1	0.0323827	-0.509735	2.15151e-05	-0.503213	7.78178e-05	-0.516944	0.882829	-0.329361	1	0.00652197	1	-0.00720929	1	0.180374	1	-0.0137313	1	0.173852	1	0.187583	-0.517467	FALSE	HYPO	0	TRUE	HYPER	HYPER	FALSE	0	0	FALSE	0	0
									ZNF91	0.540347	-0.229346	0.000289287	-0.335054	0.00161387	-0.325935	0.773965	-0.277183	1	-0.105708	1	-0.0965888	1	-0.0478374	1	0.00911897	1	0.0578703	1	0.0487514	-0.517244	FALSE	0	0	TRUE	HYPER	HYPER	FALSE	0	0	FALSE	HYPO	0
									HRASLS3	0.170352	-0.49557	6.23641e-05	-0.593451	0.000248118	-0.602102	0.329189	-0.599264	1	-0.097881	1	-0.106532	1	-0.103694	1	-0.00865135	1	-0.00581321	1	0.00283814	-0.513551	FALSE	HYPO	0	TRUE	HYPER	HYPER	FALSE	0	0	FALSE	0	0
									ZFHX3	1	-0.109874	0.488718	-0.130285	0.000978436	-0.369635	1	0.0154116	1	-0.0204105	0.247822	-0.259761	1	0.125286	0.304096	-0.23935	1	0.145696	0.44741	0.385047	-0.513487	TRUE	HYPO	0	TRUE	0	0	FALSE	0	0	FALSE	0	0
									ANXA3	1	-0.0204166	0.367976	0.0869697	0.0251343	0.160878	1	0.0480588	0.73565	0.107386	0.116099	0.181295	1	0.0684753	1	0.0739083	1	-0.0389109	1	-0.112819	-0.513068	TRUE	HYPER	0	TRUE	0	0	FALSE	HYPO	0	FALSE	0	0
									FAM63A	1	-0.0734207	0.000482018	-0.417195	0.00100632	-0.435159	1	-0.264522	0.176544	-0.343775	0.110821	-0.361739	1	-0.191101	1	-0.0179639	1	0.152673	1	0.170637	-0.512105	FALSE	HYPO	0	TRUE	HYPER	HYPER	FALSE	0	0	FALSE	0	0
									PTPLA	0.740003	0.289293	0.00263786	0.406298	0.00514434	0.420243	1	0.0584219	1	0.117005	1	0.13095	1	-0.230871	1	0.013945	1	-0.347876	0.839549	-0.361821	-0.511449	FALSE	HYPER	0	TRUE	HYPO	HYPO	FALSE	0	0	FALSE	0	0
									TP53INP1	0.131718	-0.369155	3.57874e-05	-0.434166	0.0757178	-0.242486	0.922184	-0.282218	1	-0.0650107	1	0.12667	1	0.0869377	0.836008	0.19168	1	0.151948	1	-0.0397318	-0.511367	FALSE	0	0	TRUE	HYPER	0	FALSE	0	0	TRUE	HYPO	HYPO
									PH-4	0.191663	-0.285449	3.42877e-06	-0.404127	2.12761e-06	-0.45276	0.110803	-0.445266	1	-0.118678	0.62461	-0.167311	1	-0.159817	1	-0.0486326	1	-0.0411393	1	0.00749328	-0.509846	FALSE	HYPO	0	TRUE	HYPER	HYPER	FALSE	0	0	FALSE	0	0
									TOX	0.131718	0.646126	0.000502389	0.649878	4.09341e-07	1.0221	1	0.377985	1	0.00375201	0.538478	0.375977	1	-0.268141	0.616741	0.372225	1	-0.271893	0.541516	-0.644118	-0.509452	FALSE	HYPER	0	TRUE	HYPO	HYPER	FALSE	0	0	FALSE	0	0
x	x								JAK3	1	-0.104123	0.00186249	0.416682	4.95969e-05	0.58049	1	0.212533	0.0275415	0.520804	0.0016219	0.684613	1	0.316656	1	0.163809	1	-0.204148	0.825115	-0.367957	-0.507612	FALSE	HYPER	0	FALSE	0	0	FALSE	HYPO	0	FALSE	0	0
									CTTN	1	-0.0462628	0.696586	-0.124914	0.00671207	-0.371141	1	-0.141999	1	-0.0786511	0.191987	-0.324878	1	-0.0957362	0.563085	-0.246227	1	-0.0170851	1	0.229142	-0.507378	TRUE	HYPO	0	TRUE	HYPER	HYPER	FALSE	0	0	FALSE	0	0
									CD82	1	0.00445007	0.000305583	0.33311	9.86149e-05	0.392231	1	0.206142	0.0591507	0.32866	0.0127706	0.387781	1	0.201692	1	0.0591214	1	-0.126967	1	-0.186089	-0.506985	FALSE	HYPER	0	FALSE	HYPO	0	FALSE	0	0	FALSE	0	0
									IL2RG	1	0.00447526	0.0108844	0.183203	0.000148259	0.284257	1	0.124655	0.264926	0.178728	0.0159471	0.279781	1	0.12018	1	0.101054	1	-0.058548	1	-0.159602	-0.506714	FALSE	HYPER	0	FALSE	HYPO	0	FALSE	0	0	FALSE	0	0
									MIA	0.00514474	0.490028	0.00101223	0.326135	6.96773e-06	0.478482	0.446618	0.365399	0.817959	-0.163894	1	-0.0115466	1	-0.12463	1	0.152347	1	0.0392638	1	-0.113083	-0.506675	FALSE	0	0	TRUE	HYPO	0	FALSE	HYPER	0	FALSE	0	0
									SRGAP1	1	-0.0590513	0.000482018	-0.267626	0.000115802	-0.321616	1	-0.117621	0.221153	-0.208574	0.0538758	-0.262565	1	-0.0585692	1	-0.0539904	1	0.150005	0.882883	0.203995	-0.50646	FALSE	HYPO	0	TRUE	HYPER	HYPER	FALSE	0	0	FALSE	0	0
									HLA-B	1	0.048188	0.00496269	0.242931	0.00101042	0.305294	0.917763	0.222873	0.391159	0.194744	0.10317	0.257106	1	0.174685	1	0.0623629	1	-0.0200589	1	-0.0824218	-0.506281	FALSE	HYPER	0	TRUE	HYPO	HYPO	FALSE	0	0	FALSE	0	0
									UGCG	0.224627	-0.275748	2.96483e-07	-0.445632	1.73602e-06	-0.454832	0.191016	-0.402293	0.633677	-0.169884	0.527381	-0.179084	1	-0.126545	1	-0.00919944	1	0.0433394	1	0.0525388	-0.505873	FALSE	0	0	TRUE	HYPER	HYPER	FALSE	0	0	FALSE	HYPO	0
									TFAP2B	0.366803	-0.749907	0.0184719	-0.680288	0.415722	-0.410023	0.666927	-0.883758	1	0.0696193	1	0.339884	1	-0.133851	1	0.270265	1	-0.20347	1	-0.473735	-0.505829	FALSE	0	0	TRUE	HYPER	0	FALSE	0	0	TRUE	0	0
									CHAD	1	-0.147965	7.1235e-05	-0.426405	0.00722378	-0.333791	0.964919	-0.279922	0.279805	-0.27844	0.743763	-0.185827	1	-0.131958	1	0.0926134	1	0.146482	1	0.0538689	-0.505343	FALSE	0	0	TRUE	HYPER	HYPER	FALSE	0	0	FALSE	HYPO	0
									PDCD4	0.732778	-0.20484	1.77554e-05	-0.394035	0.00522957	-0.295871	0.682055	-0.29873	0.565353	-0.189195	1	-0.0910311	1	-0.0938903	1	0.0981634	1	0.0953042	1	-0.00285917	-0.505311	FALSE	0	0	TRUE	HYPER	HYPER	FALSE	0	0	FALSE	HYPO	0
x									RARRES1	0.636616	0.243424	9.91329e-05	0.402598	0.000652463	0.392665	0.286942	0.431331	0.916141	0.159174	0.924003	0.149241	1	0.187907	1	-0.00993318	1	0.028733	1	0.0386662	-0.504645	FALSE	0	0	TRUE	HYPO	0	FALSE	0	0	FALSE	0	0
									HIST1H2BC	1	0.0343221	0.140724	-0.162996	0.0142679	-0.251876	1	-0.0926749	0.434705	-0.197318	0.0760854	-0.286198	1	-0.126997	1	-0.0888801	1	0.0703208	1	0.159201	-0.504131	TRUE	HYPO	HYPO	TRUE	0	0	FALSE	HYPER	0	FALSE	0	0
									KCNK5	0.131302	0.410967	7.88812e-06	0.520749	4.9476e-07	0.643812	0.262977	0.500252	1	0.109782	0.572624	0.232845	1	0.0892848	1	0.123063	1	-0.0204969	1	-0.14356	-0.503917	FALSE	HYPER	0	TRUE	HYPO	0	FALSE	0	0	FALSE	0	0
									CNNM4	1	-0.1646	0.729014	-0.104283	0.000115469	-0.437558	1	-0.0651542	1	0.0603169	0.225486	-0.272958	1	0.0994455	0.0727732	-0.333275	1	0.0391286	0.513859	0.372403	-0.503369	TRUE	HYPO	HYPO	TRUE	HYPER	HYPO	FALSE	0	0	FALSE	0	0
									FABP7	0.00757015	0.347191	6.49621e-11	0.480903	1.03549e-08	0.449133	0.0459898	0.405447	0.683234	0.133712	0.928956	0.101942	1	0.058256	1	-0.0317697	1	-0.0754559	1	-0.0436862	-0.503148	FALSE	0	0	TRUE	HYPO	HYPO	FALSE	0	0	FALSE	HYPER	0
									ITGAL	1	-0.043234	6.0681e-05	0.31033	3.25048e-05	0.353572	1	0.170834	0.00743137	0.353564	0.00204496	0.396806	1	0.214068	1	0.0432426	1	-0.139495	1	-0.182738	-0.502581	FALSE	HYPER	0	FALSE	0	0	FALSE	HYPO	0	FALSE	0	0
									CPNE8	0.303746	0.40129	0.000383058	0.490368	4.59684e-05	0.611518	1	0.259243	1	0.0890774	0.864954	0.210228	1	-0.142048	1	0.121151	1	-0.231125	0.940822	-0.352276	-0.502223	FALSE	HYPER	0	TRUE	HYPO	0	FALSE	0	0	FALSE	0	0
									ZCCHC11	1	0.129891	0.00073012	0.32931	0.000358049	0.379707	1	0.0390292	0.547196	0.19942	0.244628	0.249817	1	-0.0908614	1	0.0503971	1	-0.290281	0.536103	-0.340678	-0.501664	FALSE	HYPER	0	TRUE	HYPO	HYPER	FALSE	0	0	FALSE	0	0
									FAM110C	0.295196	-0.299757	5.64633e-06	-0.457567	0.00016533	-0.421021	0.322269	-0.411107	0.906636	-0.15781	1	-0.121265	1	-0.11135	1	0.0365457	1	0.04646	1	0.00991434	-0.501473	FALSE	0	0	TRUE	HYPER	HYPER	FALSE	0	0	FALSE	HYPO	0
									CTSC	0.369035	0.261001	1.8208e-08	0.530443	4.15237e-07	0.518619	0.8777	0.260743	0.185246	0.269441	0.189003	0.257618	1	-0.000258485	1	-0.0118232	1	-0.2697	0.849596	-0.257876	-0.50132	FALSE	0	0	TRUE	HYPO	HYPO	FALSE	0	0	FALSE	HYPER	0
									SAMD9L	1	0.0853448	0.157335	0.205343	0.00171362	0.397775	1	0.202763	1	0.119998	0.181282	0.31243	1	0.117418	0.951287	0.192432	1	-0.00257997	1	-0.195012	-0.501258	TRUE	HYPER	HYPER	TRUE	HYPO	HYPER	FALSE	0	0	FALSE	0	0
									KIAA1244	0.0579435	-0.265365	8.22883e-07	-0.32507	4.99943e-05	-0.294975	0.680631	-0.214907	1	-0.0597045	1	-0.0296093	1	0.0504579	1	0.0300952	1	0.110162	1	0.0800672	-0.500134	FALSE	0	0	TRUE	HYPER	0	FALSE	0	0	FALSE	HYPO	0
									PPP1R1B	1	0.139542	0.0736555	0.162268	0.000361657	0.305518	1	0.037762	1	0.0227258	0.467578	0.165976	1	-0.10178	0.797669	0.14325	1	-0.124506	0.543289	-0.267756	-0.499789	TRUE	HYPER	HYPER	TRUE	HYPO	HYPER	FALSE	0	0	FALSE	0	0
									PLEKHF1	0.27761	0.317059	2.22304e-06	0.494932	1.85134e-06	0.54704	0.498222	0.379291	0.811708	0.177874	0.442146	0.229981	1	0.0622326	1	0.0521076	1	-0.115641	1	-0.167749	-0.499593	FALSE	HYPER	0	TRUE	HYPO	0	FALSE	0	0	FALSE	0	0
									BMPR1B	1	0.0993868	0.175565	-0.13605	0.577868	-0.0995973	1	0.130253	0.131384	-0.235436	0.243578	-0.198984	1	0.0308667	1	0.0364524	1	0.266303	0.742062	0.229851	-0.49905	FALSE	0	0	FALSE	0	0	FALSE	0	0	FALSE	HYPO	0
									KIF12	1	-0.013376	0.00383424	-0.201676	0.00336137	-0.224264	1	-0.123394	0.203987	-0.1883	0.0966237	-0.210889	1	-0.110018	1	-0.0225883	1	0.0782822	1	0.100871	-0.498035	FALSE	HYPO	0	TRUE	HYPER	0	FALSE	0	0	FALSE	0	0
									RAC2	0.951809	0.192321	0.0198103	0.252154	0.000653133	0.381129	1	0.2211	1	0.0598327	0.642878	0.188808	1	0.0287793	1	0.128975	1	-0.0310534	1	-0.160029	-0.497989	FALSE	HYPER	0	TRUE	HYPO	0	FALSE	0	0	FALSE	0	0
									MESP2	0.713284	0.162118	0.086056	0.147553	0.000913811	0.267575	1	0.0764896	1	-0.0145651	0.912879	0.105456	1	-0.0856289	1	0.120022	1	-0.0710638	0.906424	-0.191085	-0.497059	TRUE	HYPER	HYPER	TRUE	HYPO	0	FALSE	0	0	FALSE	0	0
									PARD6B	1	0.113524	0.0439612	-0.280214	0.000570992	-0.473713	1	0.0703577	0.112893	-0.393738	0.00444979	-0.587237	1	-0.0431666	1	-0.193499	1	0.350572	0.378318	0.544071	-0.496608	FALSE	HYPO	0	FALSE	0	0	FALSE	HYPER	0	FALSE	0	0
									TNFAIP8	1	-0.0566179	0.500154	0.100791	0.00237623	0.269475	1	0.100473	0.593076	0.157409	0.0146014	0.326093	1	0.157091	0.493464	0.168685	1	-0.000317381	1	-0.169002	-0.496309	TRUE	HYPER	0	FALSE	0	0	FALSE	HYPO	0	FALSE	0	0
									MRPS30	1	-0.0391109	0.108074	-0.270307	0.0188221	-0.384239	1	0.00503877	0.820016	-0.231197	0.283092	-0.345128	1	0.0441497	1	-0.113932	1	0.275346	0.825115	0.389278	-0.496079	TRUE	HYPO	0	TRUE	HYPER	0	FALSE	0	0	FALSE	0	0
									CLIC6	0.505108	-0.294699	4.18269e-07	-0.583057	2.93836e-05	-0.530247	0.210273	-0.522506	0.323188	-0.288358	0.537974	-0.235549	1	-0.227807	1	0.0528097	1	0.060551	1	0.00774132	-0.495346	FALSE	0	0	TRUE	HYPER	HYPER	FALSE	0	0	FALSE	HYPO	0
									PTGER3	1	0.0199965	0.000400565	-0.331076	0.000117279	-0.392682	0.773965	-0.278462	0.042041	-0.351073	0.00833132	-0.412678	1	-0.298459	1	-0.0616052	1	0.0526143	1	0.11422	-0.495126	FALSE	HYPO	0	FALSE	0	0	FALSE	HYPER	0	FALSE	0	0
									DUSP5	0.00125729	-0.58932	3.99019e-11	-0.734465	2.32334e-11	-0.837832	0.00606965	-0.70409	1	-0.145145	0.369183	-0.248512	1	-0.114771	1	-0.103366	1	0.0303748	1	0.133741	-0.493903	FALSE	HYPO	0	TRUE	HYPER	HYPER	FALSE	0	0	FALSE	0	0
									RIPK4	1	0.0558963	8.58001e-07	0.474327	3.06157e-07	0.542741	0.345355	0.385433	0.0135175	0.418431	0.0025248	0.486844	1	0.329537	1	0.0684137	1	-0.0888938	1	-0.157308	-0.493601	FALSE	HYPER	0	FALSE	HYPO	0	FALSE	0	0	FALSE	0	0
									KLHDC7A	1	-0.19834	0.00635091	-0.359971	0.154888	-0.253736	1	-0.0289352	1	-0.161631	1	-0.0553968	1	0.169404	1	0.106234	1	0.331035	1	0.224801	-0.493171	FALSE	0	0	TRUE	HYPER	0	FALSE	0	0	TRUE	HYPO	HYPO
									DEGS2	0.633764	-0.174434	0.000306255	-0.269086	0.107806	-0.159934	1	-0.153337	1	-0.0946513	1	0.0145004	1	0.0210972	1	0.109152	1	0.115749	1	0.00659689	-0.492858	FALSE	0	0	TRUE	HYPER	0	FALSE	0	0	TRUE	HYPO	HYPO
									SEMA3C	0.574985	-0.270525	1.74699e-05	-0.471811	8.62144e-07	-0.593635	1	-0.162833	0.719756	-0.201286	0.142179	-0.32311	1	0.107692	1	-0.121824	1	0.308978	0.441907	0.430802	-0.492086	FALSE	HYPO	0	TRUE	HYPER	0	FALSE	0	0	FALSE	0	0
									MEIS1	1	-0.0690033	0.207553	0.209957	0.00387626	0.403607	1	-0.116717	0.427012	0.27896	0.0268004	0.472611	1	-0.0477134	1	0.19365	1	-0.326674	0.386284	-0.520324	-0.491789	TRUE	HYPER	HYPER	FALSE	0	0	FALSE	0	0	FALSE	0	0
									VAV1	1	-0.059893	0.11495	0.155866	0.0588075	0.192227	1	0.132925	0.242965	0.215759	0.0965643	0.25212	1	0.192818	1	0.0363609	1	-0.0229413	1	-0.0593021	-0.49104	FALSE	HYPER	0	FALSE	0	0	FALSE	HYPO	0	FALSE	0	0
									FASN	0.624399	-0.273076	3.41887e-06	-0.531408	2.51416e-05	-0.532091	1	-0.0853075	0.441701	-0.258332	0.407786	-0.259015	1	0.187769	1	-0.000683164	1	0.446101	0.441907	0.446784	-0.490826	FALSE	0	0	TRUE	HYPER	0	FALSE	0	0	FALSE	HYPO	0
				X					SLC2A10	0.00615807	-0.63932	7.07165e-07	-0.636315	1.15976e-05	-0.618608	0.261009	-0.552987	1	0.00300518	1	0.0207123	1	0.0863336	1	0.0177072	1	0.0833284	1	0.0656213	-0.490793	FALSE	0	0	TRUE	HYPER	HYPER	FALSE	HYPO	0	FALSE	0	0
									C8orf38	0.144055	-0.276562	0.169863	-0.14408	0.0189502	-0.223919	1	-0.135598	0.84042	0.132482	1	0.0526433	1	0.140964	1	-0.0798388	1	0.00848195	1	0.0883208	-0.488934	TRUE	0	0	TRUE	HYPER	HYPO	FALSE	HYPO	0	FALSE	0	0
									SLC22A5	1	-0.0806446	0.0096992	-0.189612	0.0148941	-0.199266	1	-0.13352	0.89987	-0.108967	0.754777	-0.118622	1	-0.0528757	1	-0.00965424	1	0.0560918	1	0.065746	-0.488715	FALSE	HYPO	0	TRUE	HYPER	0	FALSE	0	0	FALSE	0	0
									THSD4	0.648697	-0.161912	0.00346373	-0.210003	0.0236818	-0.188098	1	-0.0851572	1	-0.0480917	1	-0.0261859	1	0.0767545	1	0.0219057	1	0.124846	1	0.10294	-0.488658	FALSE	0	0	TRUE	HYPER	HYPO	FALSE	0	0	FALSE	HYPO	0
x									S100A2	1	0.0855652	0.00018547	0.362308	1.2351e-05	0.461789	1	0.236749	0.187106	0.276743	0.0246116	0.376224	1	0.151184	1	0.0994809	1	-0.125559	1	-0.22504	-0.488605	FALSE	HYPER	0	FALSE	HYPO	0	FALSE	0	0	FALSE	0	0
									PTPN14	0.00615807	0.53544	3.3808e-11	0.751523	1.82151e-07	0.61768	0.285426	0.451431	0.597612	0.216083	1	0.08224	1	-0.0840087	1	-0.133843	1	-0.300091	1	-0.166249	-0.488295	FALSE	0	0	TRUE	HYPO	0	FALSE	0	0	FALSE	HYPER	0
									IMPA2	1	0.134104	0.000502818	0.418298	0.0664907	0.279216	0.307532	0.486682	0.368133	0.284194	1	0.145112	1	0.352578	1	-0.139082	1	0.0683841	1	0.207466	-0.488154	FALSE	0	0	TRUE	HYPO	HYPO	FALSE	0	0	TRUE	0	0
									PDCD5	0.84517	0.185862	8.51124e-07	0.439646	0.551304	0.12025	1	0.127527	0.198407	0.253784	1	-0.065612	1	-0.0583349	0.0271499	-0.319396	1	-0.312119	1	0.00727705	-0.487985	FALSE	0	0	FALSE	HYPO	0	FALSE	0	0	TRUE	HYPER	HYPER
									DSTN	1	-0.0772014	0.00416202	-0.330053	8.15861e-05	-0.479806	1	-0.143827	0.424971	-0.252852	0.0393559	-0.402605	1	-0.0666254	1	-0.149753	1	0.186226	0.729874	0.33598	-0.485906	FALSE	HYPO	0	FALSE	HYPER	0	FALSE	0	0	FALSE	0	0
									RAB17	1	-0.155029	0.00746235	-0.314024	2.42775e-05	-0.517617	1	-0.123714	0.977249	-0.158994	0.0794106	-0.362587	1	0.0313155	0.831541	-0.203593	1	0.19031	0.536103	0.393903	-0.484995	FALSE	HYPO	0	TRUE	HYPER	0	FALSE	0	0	FALSE	0	0
									ECHDC1	0.00615807	0.633194	7.43167e-05	0.505081	0.000788752	0.478692	0.593653	0.436755	1	-0.128113	1	-0.154501	1	-0.196439	1	-0.0263886	1	-0.0683264	1	-0.0419377	-0.484904	FALSE	0	0	TRUE	HYPO	HYPER	FALSE	HYPER	0	FALSE	0	0
									PMAIP1	1	0.105485	0.984735	0.0417607	0.116252	-0.170345	1	0.14004	1	-0.0637247	0.0550891	-0.27583	1	0.0345549	0.180962	-0.212105	1	0.0982796	0.441907	0.310385	-0.484849	FALSE	HYPO	0	FALSE	0	0	FALSE	0	0	FALSE	0	0
									STK17B	1	-0.141028	0.00072837	0.34252	0.00189277	0.349839	1	0.171446	0.00328438	0.483548	0.00327314	0.490867	1	0.312474	1	0.00731833	1	-0.171074	1	-0.178393	-0.484831	FALSE	HYPER	0	FALSE	0	0	FALSE	HYPO	0	FALSE	0	0
									RBM38	1	0.179013	6.81747e-09	0.712018	2.68227e-07	0.685291	0.0787916	0.644484	0.0115124	0.533005	0.0146014	0.506277	1	0.465471	1	-0.0267274	1	-0.0675337	1	-0.0408063	-0.48435	FALSE	0	0	FALSE	HYPO	0	FALSE	0	0	FALSE	HYPER	0
									ANXA9	0.0849371	-0.496902	0.00899117	-0.358245	0.00469203	-0.421239	1	-0.264728	1	0.138657	1	0.0756633	1	0.232174	1	-0.0629938	1	0.0935169	1	0.156511	-0.484081	FALSE	0	0	TRUE	HYPER	0	FALSE	HYPO	0	FALSE	0	0
									RBM24	1	0.158589	1	0.0221154	0.170074	-0.230162	1	-0.0308724	1	-0.136473	0.0676745	-0.388751	1	-0.189461	0.48192	-0.252277	1	-0.0529878	1	0.19929	-0.483753	FALSE	HYPO	0	FALSE	0	0	FALSE	HYPER	0	FALSE	0	0
									MED13L	1	-0.0275714	0.000126328	-0.289513	0.000253198	-0.30543	1	-0.158933	0.071177	-0.261942	0.0363661	-0.277858	1	-0.131362	1	-0.0159169	1	0.13058	1	0.146496	-0.483569	FALSE	HYPO	0	FALSE	HYPER	0	FALSE	0	0	FALSE	0	0
									CRAT	0.0643348	-0.33937	5.90015e-10	-0.544266	0.000341052	-0.341024	0.732151	-0.267911	0.371543	-0.204896	1	-0.00165422	1	0.0714585	0.321172	0.203242	1	0.276355	1	0.0731127	-0.482772	FALSE	0	0	TRUE	HYPER	HYPER	FALSE	0	0	FALSE	HYPO	0
									SLITRK6	1	-0.00231779	0.0233846	-0.206446	0.0109946	-0.248717	1	0.0342624	0.349329	-0.204128	0.138073	-0.246399	1	0.0365802	1	-0.0422712	1	0.240708	0.572897	0.28298	-0.48269	FALSE	HYPO	0	TRUE	0	0	FALSE	0	0	FALSE	0	0
									USP13	1	0.133924	1.96594e-05	0.376512	0.47508	0.127879	1	0.10959	0.225955	0.242588	1	-0.00604525	1	-0.0243349	0.136142	-0.248633	1	-0.266922	1	-0.0182896	-0.482485	FALSE	0	0	TRUE	HYPO	HYPO	FALSE	0	0	TRUE	HYPER	0
									SCRN1	0.492743	-0.265287	1	0.0252771	0.202644	-0.195931	1	-0.250168	0.203435	0.290564	1	0.0693562	1	0.0151187	0.506332	-0.221208	1	-0.275445	1	-0.0542375	-0.481701	FALSE	0	0	FALSE	0	0	FALSE	HYPO	0	FALSE	HYPER	0
									PLAC8	1	-0.016083	0.00140976	0.208434	0.00878421	0.194117	1	0.0894659	0.0661969	0.224517	0.0735177	0.2102	1	0.105549	1	-0.0143173	1	-0.118968	1	-0.104651	-0.481599	FALSE	0	0	TRUE	0	0	FALSE	HYPO	0	FALSE	HYPER	0
									IL15RA	0.658947	0.355479	0.00907068	0.420718	0.0116675	0.450873	0.945125	0.40412	1	0.0652389	1	0.0953944	1	0.0486408	1	0.0301556	1	-0.016598	1	-0.0467536	-0.480852	FALSE	HYPER	0	TRUE	HYPO	0	FALSE	0	0	FALSE	0	0
									EPS15L1	1	0.0360475	0.476595	-0.113407	0.0217684	-0.236423	1	-0.118615	0.784066	-0.149455	0.0935666	-0.272471	1	-0.154663	1	-0.123016	1	-0.00520766	1	0.117808	-0.480581	TRUE	HYPO	HYPO	TRUE	0	0	FALSE	HYPER	0	FALSE	0	0
									YOD1	0.336266	0.300305	0.00583696	0.30334	0.0104627	0.313836	0.446451	0.394574	1	0.00303515	1	0.0135307	1	0.0942694	1	0.0104956	1	0.0912342	1	0.0807387	-0.480452	FALSE	0	0	TRUE	HYPO	0	FALSE	0	0	FALSE	0	0
									FRMD3	0.304614	0.18143	3.43773e-05	0.255461	4.59001e-06	0.309826	1	0.135526	1	0.0740309	0.51411	0.128396	1	-0.0459043	1	0.0543651	1	-0.119935	0.829077	-0.1743	-0.480319	FALSE	HYPER	0	TRUE	HYPO	0	FALSE	0	0	FALSE	0	0
									PPAPDC1B	1	0.0460538	0.0152524	-0.205383	0.0113748	-0.23436	1	-0.0705497	0.114453	-0.251437	0.0473679	-0.280414	1	-0.116603	1	-0.0289769	1	0.134833	1	0.16381	-0.480228	FALSE	HYPO	0	FALSE	0	0	FALSE	HYPER	0	FALSE	0	0
									FAM100B	0.277091	0.221551	1.78201e-06	0.34876	1.15976e-05	0.352334	0.206827	0.334596	0.784713	0.127209	0.708841	0.130783	1	0.113045	1	0.0035737	1	-0.0141643	1	-0.017738	-0.478614	FALSE	0	0	TRUE	HYPO	HYPO	FALSE	0	0	FALSE	HYPER	0
									C1orf38	1	0.092224	0.000298294	0.31196	0.00150002	0.305711	1	0.0264518	0.291108	0.219736	0.287722	0.213487	1	-0.0657722	1	-0.00624817	1	-0.285508	0.61306	-0.27926	-0.478382	FALSE	0	0	TRUE	HYPO	0	FALSE	0	0	FALSE	HYPER	0
									RTN4RL1	0.2402	-0.248731	0.000538616	-0.278621	0.000105204	-0.339408	0.627086	-0.267849	1	-0.0298906	1	-0.0906776	1	-0.0191186	1	-0.0607869	1	0.010772	1	0.0715589	-0.478286	FALSE	HYPO	0	TRUE	HYPER	0	FALSE	0	0	FALSE	0	0
									EIF3E	0.700874	0.496136	5.01029e-06	0.99525	0.0295335	0.578759	0.875324	0.610764	0.427415	0.499114	1	0.0826226	1	0.114628	0.749716	-0.416491	1	-0.384486	1	0.0320056	-0.478098	FALSE	0	0	TRUE	HYPO	HYPO	FALSE	0	0	FALSE	HYPER	0
									C19orf21	0.327908	-0.348276	6.94665e-07	-0.599154	2.20968e-05	-0.564642	1	-0.158519	0.552626	-0.250879	0.706868	-0.216366	1	0.189757	1	0.0345123	1	0.440636	0.580676	0.406124	-0.477103	FALSE	0	0	TRUE	HYPER	0	FALSE	0	0	FALSE	HYPO	0
									SCCPDH	1	0.0203852	0.109388	-0.271405	0.000438643	-0.540535	1	-0.269303	0.529489	-0.291791	0.0182353	-0.56092	1	-0.289688	0.695519	-0.26913	1	0.00210283	1	0.271233	-0.475942	TRUE	HYPO	HYPO	FALSE	0	0	FALSE	HYPER	0	FALSE	0	0
									PAPSS1	0.0271741	0.33602	1.32059e-07	0.406214	2.79021e-08	0.470473	0.303343	0.317901	1	0.0701937	0.733087	0.134453	1	-0.0181196	1	0.0642594	1	-0.0883133	1	-0.152573	-0.475608	FALSE	HYPER	0	TRUE	HYPO	0	FALSE	0	0	FALSE	0	0
									MARVELD2	1	0.106238	4.04069e-05	-0.702277	3.99958e-06	-0.864634	1	-0.167479	0.00497503	-0.808514	0.000481622	-0.970872	1	-0.273717	1	-0.162357	1	0.534797	0.397481	0.697155	-0.475422	FALSE	HYPO	0	FALSE	0	0	FALSE	HYPER	0	FALSE	0	0
									SIRPA	0.0773241	0.301809	2.65699e-06	0.364571	1.56448e-08	0.48644	0.371903	0.304714	1	0.0627618	0.348436	0.184631	1	0.00290536	1	0.121869	1	-0.0598564	1	-0.181726	-0.475353	FALSE	HYPER	0	TRUE	HYPO	HYPER	FALSE	0	0	FALSE	0	0
									C14orf140	1	0.0596753	0.0731456	-0.188656	0.00217828	-0.311053	0.964919	-0.233808	0.215208	-0.248331	0.015622	-0.370728	1	-0.293484	1	-0.122397	1	-0.0451525	1	0.0772443	-0.4751	TRUE	HYPO	0	FALSE	0	0	FALSE	HYPER	0	FALSE	0	0
									PLEKHO2	1	-0.01585	0.33952	0.101674	0.0401999	0.17211	1	-0.0750717	0.787174	0.117524	0.184185	0.18796	1	-0.0592217	1	0.0704368	1	-0.176745	0.506957	-0.247182	-0.474559	TRUE	HYPER	0	TRUE	0	0	FALSE	0	0	FALSE	0	0
									LRRC8C	6.75924e-06	0.761073	2.49775e-11	0.807901	8.43546e-11	0.80489	0.285175	0.457297	1	0.0468278	1	0.0438168	1	-0.303776	1	-0.00301094	1	-0.350603	0.657251	-0.347592	-0.474553	FALSE	0	0	TRUE	HYPO	0	FALSE	0	0	FALSE	HYPER	0
									GJA1	0.569467	0.373346	0.765984	-0.146416	0.145611	0.310131	1	0.0330797	0.0774155	-0.519762	1	-0.0632148	1	-0.340266	0.123433	0.456547	1	0.179496	1	-0.277051	-0.473698	FALSE	0	0	FALSE	0	0	FALSE	HYPER	0	FALSE	HYPO	0
x									SERPINA5	0.322061	-0.232818	0.00886206	-0.221935	0.076917	-0.184495	0.883512	-0.222219	1	0.0108831	1	0.0483223	1	0.0105986	1	0.0374392	1	-0.000284444	1	-0.0377237	-0.473055	FALSE	0	0	TRUE	HYPER	0	FALSE	HYPO	0	TRUE	0	0
									ADCY9	1	-0.113432	0.00655478	-0.281159	6.92059e-08	-0.583534	0.856936	-0.279693	0.807219	-0.167727	0.00438882	-0.470103	1	-0.166261	0.120906	-0.302375	1	0.00146608	0.711101	0.303842	-0.473052	FALSE	HYPO	0	FALSE	HYPER	0	FALSE	0	0	FALSE	0	0
									EZH1	0.91868	0.144686	0.102602	-0.146303	0.062953	-0.174815	1	-0.129909	0.0298514	-0.290989	0.0109467	-0.3195	1	-0.274594	1	-0.0285115	1	0.0163945	1	0.0449059	-0.472877	FALSE	HYPO	0	FALSE	0	0	TRUE	HYPER	HYPER	FALSE	0	0
									RND1	0.0195392	-0.388975	3.06347e-06	-0.401918	1.46208e-05	-0.411048	0.360132	-0.342105	1	-0.0129426	1	-0.0220726	1	0.0468697	1	-0.00913001	1	0.0598123	1	0.0689423	-0.472275	FALSE	HYPO	0	TRUE	HYPER	0	FALSE	0	0	FALSE	0	0
									TMPRSS2	1	-0.129696	0.159352	0.175365	0.016377	0.273639	1	0.0252773	0.115538	0.305062	0.0142328	0.403336	1	0.154974	1	0.0982743	1	-0.150088	0.940822	-0.248362	-0.471613	TRUE	HYPER	0	FALSE	0	0	FALSE	HYPO	0	FALSE	0	0
									NUPR1	1	-0.052905	0.0125625	-0.36516	0.690507	-0.158875	1	-0.290898	0.432303	-0.312255	1	-0.10597	1	-0.237993	1	0.206285	1	0.0742614	1	-0.132023	-0.47109	FALSE	0	0	TRUE	HYPER	HYPER	FALSE	0	0	TRUE	HYPO	0
									DNAJC15	1	-0.15099	0.834564	0.0763187	0.534319	0.120201	1	-0.146597	0.287618	0.227309	0.108759	0.271191	1	0.00439326	1	0.0438823	1	-0.222915	0.735366	-0.266798	-0.470702	FALSE	HYPER	0	FALSE	0	0	FALSE	HYPO	0	FALSE	0	0
									GPR81	0.649149	-0.311647	1.05631e-06	-0.64726	5.14184e-10	-0.924606	0.731391	-0.416935	0.310943	-0.335613	0.00645359	-0.612959	1	-0.105288	0.559873	-0.277346	1	0.230325	0.457842	0.507671	-0.47006	FALSE	HYPO	0	FALSE	HYPER	0	FALSE	0	0	FALSE	0	0
									MCOLN2	0.647597	0.178711	0.00021919	0.283801	3.2337e-06	0.388208	1	0.158093	1	0.105091	0.190492	0.209498	1	-0.0206173	1	0.104407	1	-0.125708	0.74039	-0.230115	-0.470055	FALSE	HYPER	0	TRUE	HYPO	0	FALSE	0	0	FALSE	0	0
									ELOVL2	1	0.03551	0.03015	-0.233611	0.000185383	-0.404271	1	-0.203129	0.22295	-0.269121	0.00785689	-0.439781	1	-0.238639	0.910917	-0.17066	1	0.0304821	1	0.201142	-0.47	FALSE	HYPO	0	FALSE	0	0	FALSE	HYPER	0	FALSE	0	0
									ZNF671	0.163324	-0.539428	0.000167461	-0.605139	0.00232083	-0.55217	0.170021	-0.763107	1	-0.065711	1	-0.0127424	1	-0.22368	1	0.0529686	1	-0.157969	1	-0.210937	-0.469485	FALSE	0	0	TRUE	HYPER	HYPER	FALSE	0	0	FALSE	0	0
									LMO3	1	-0.138618	0.921525	0.0669009	0.104294	0.205027	1	0.10225	0.482756	0.205519	0.0386901	0.343645	1	0.240868	1	0.138126	1	0.0353491	1	-0.102777	-0.469293	TRUE	HYPER	HYPER	FALSE	0	0	TRUE	HYPO	0	FALSE	0	0
									ITGA9	0.369035	0.253378	9.23247e-05	0.355841	1.21552e-06	0.482394	0.989513	0.232236	1	0.102463	0.280214	0.229017	1	-0.0211417	1	0.126553	1	-0.123605	0.851229	-0.250158	-0.468999	FALSE	HYPER	0	TRUE	HYPO	0	FALSE	0	0	FALSE	0	0
									AKR7A3	0.677824	-0.156878	1.29421e-07	-0.359099	3.41142e-05	-0.309603	0.914472	-0.18343	0.157717	-0.202221	0.411996	-0.152725	1	-0.026552	1	0.0494959	1	0.175669	1	0.126173	-0.468555	FALSE	0	0	TRUE	HYPER	0	FALSE	0	0	FALSE	HYPO	0
									YPEL2	0.34262	-0.288505	0.00152494	-0.329979	0.024619	-0.274532	1	-0.203894	1	-0.0414746	1	0.0139728	1	0.0846101	1	0.0554474	1	0.126085	1	0.0706373	-0.467365	FALSE	0	0	TRUE	HYPER	0	FALSE	0	0	FALSE	HYPO	0
									CDC42EP3	0.733067	0.219713	0.000971466	0.332569	3.25048e-05	0.451561	1	0.119593	1	0.112856	0.35988	0.231848	1	-0.10012	1	0.118992	1	-0.212976	0.578748	-0.331968	-0.466398	FALSE	HYPER	0	TRUE	HYPO	0	FALSE	0	0	FALSE	0	0
									TCF7L1	0.11419	0.280876	4.09093e-06	0.35858	1.0025e-05	0.378021	1	0.138489	1	0.0777039	1	0.097145	1	-0.142387	1	0.0194411	1	-0.220091	0.718256	-0.239532	-0.46639	FALSE	HYPER	0	TRUE	HYPO	HYPER	FALSE	0	0	FALSE	0	0
									OBFC2A	0.866231	0.136882	2.37467e-06	0.315942	1.23129e-05	0.32219	0.537956	0.238479	0.252193	0.17906	0.188267	0.185308	1	0.101597	1	0.00624765	1	-0.0774637	1	-0.0837114	-0.466277	FALSE	HYPER	0	TRUE	HYPO	HYPO	FALSE	0	0	FALSE	0	0
									RAB38	1	0.0273248	0.210954	0.150213	0.0060329	0.278208	1	0.0772728	0.992355	0.122888	0.160162	0.250883	1	0.049948	1	0.127995	1	-0.0729401	1	-0.200935	-0.46576	TRUE	HYPER	HYPER	TRUE	HYPO	HYPER	FALSE	0	0	FALSE	0	0
									FAM46A	0.371387	0.296837	0.0021483	0.33753	0.367338	0.170612	0.63168	0.358849	1	0.0406929	1	-0.126225	1	0.062012	1	-0.166918	1	0.0213191	1	0.188237	-0.465457	FALSE	0	0	TRUE	HYPO	0	FALSE	0	0	TRUE	0	0
							X		CDKN2A	0.00145091	0.417126	9.25527e-11	0.510419	2.83161e-07	0.430178	0.160217	0.367186	1	0.0932934	1	0.0130523	1	-0.0499394	1	-0.080241	1	-0.143233	1	-0.0629917	-0.465247	FALSE	0	0	TRUE	HYPO	HYPO	FALSE	0	0	FALSE	HYPER	0
									GYLTL1B	0.108973	0.348397	0.052843	0.212967	0.00163306	0.342083	1	0.209281	0.987533	-0.13543	1	-0.00631465	1	-0.139117	1	0.129115	1	-0.00368642	1	-0.132802	-0.465112	TRUE	0	0	TRUE	HYPO	0	FALSE	HYPER	0	FALSE	0	0
									PER2	1	0.0203183	0.0406525	-0.272361	0.119516	-0.252117	1	-0.0853682	0.335121	-0.292679	0.383874	-0.272436	1	-0.105686	1	0.0202438	1	0.186993	1	0.166749	-0.464816	FALSE	0	0	TRUE	0	0	FALSE	HYPER	0	TRUE	HYPO	0
									AKAP8L	1	-0.0677937	2.99195e-06	-0.34932	1.17056e-05	-0.360552	0.69682	-0.239761	0.0436587	-0.281527	0.0247698	-0.292759	1	-0.171968	1	-0.011232	1	0.109559	1	0.120791	-0.464672	FALSE	HYPO	0	FALSE	HYPER	0	FALSE	0	0	FALSE	0	0
									EBI2	1	0.061986	3.38874e-06	0.453509	0.00104802	0.360486	0.919045	0.26362	0.0277653	0.391523	0.11502	0.2985	1	0.201634	1	-0.0930238	1	-0.189889	1	-0.0968655	-0.464316	FALSE	0	0	FALSE	HYPO	0	FALSE	0	0	FALSE	HYPER	0
				X					SPDEF	0.0474243	-0.495029	0.000316032	-0.439822	1.65882e-05	-0.571504	1	-0.231275	1	0.0552076	1	-0.0764745	1	0.263754	1	-0.131682	1	0.208546	0.829077	0.340229	-0.463597	FALSE	HYPO	0	TRUE	HYPER	0	FALSE	0	0	FALSE	0	0
									RASGRP1	0.8928	0.140503	0.00513449	0.205512	0.00564636	0.223968	0.475292	0.259585	1	0.0650083	1	0.0834644	1	0.119082	1	0.0184561	1	0.0540736	1	0.0356175	-0.463443	FALSE	0	0	TRUE	HYPO	0	FALSE	0	0	FALSE	0	0
									PSMB4	0.000751944	0.362268	7.77983e-08	0.340604	0.000500403	0.244975	0.223712	0.281889	1	-0.0216643	0.662383	-0.117293	1	-0.0803797	1	-0.0956286	1	-0.0587153	1	0.0369132	-0.46336	FALSE	0	0	TRUE	HYPO	HYPO	FALSE	HYPER	0	FALSE	0	0
									BHLHB2	1	-0.0819	0.0138072	-0.232293	0.030335	-0.232965	1	0.031049	0.808656	-0.150393	0.757368	-0.151065	1	0.112949	1	-0.000671108	1	0.263342	0.753373	0.264014	-0.463276	FALSE	0	0	TRUE	0	0	FALSE	0	0	FALSE	HYPO	0
									LMX1B	0.103256	-0.325714	8.58001e-07	-0.434872	1.57319e-06	-0.465589	0.291486	-0.369662	1	-0.109157	0.840923	-0.139875	1	-0.0439474	1	-0.0307176	1	0.06521	1	0.0959275	-0.462358	FALSE	HYPO	0	TRUE	HYPER	0	FALSE	0	0	FALSE	0	0
									CCT5	1	0.000707849	0.0127841	0.23645	0.172347	0.1759	1	0.215883	0.261118	0.235742	0.590558	0.175193	1	0.215176	1	-0.0605495	1	-0.0205665	1	0.039983	-0.462269	FALSE	0	0	TRUE	HYPO	HYPO	FALSE	0	0	TRUE	HYPER	HYPO
									KIAA1804	0.0461782	0.373382	0.000716875	0.312167	0.0330166	0.236334	0.983607	0.232772	1	-0.0612151	0.88544	-0.137048	1	-0.14061	1	-0.0758334	1	-0.0793954	1	-0.003562	-0.461805	FALSE	0	0	TRUE	HYPO	HYPO	FALSE	HYPER	0	FALSE	0	0
									DIXDC1	1	-0.0106491	0.184462	-0.0982191	0.958482	0.0373963	1	-0.106877	0.89929	-0.08757	1	0.0480454	1	-0.0962277	0.276663	0.135615	1	-0.00865774	0.940822	-0.144273	-0.461268	FALSE	HYPER	0	FALSE	0	0	FALSE	0	0	FALSE	0	0
									KIAA1949	1	0.246915	0.013522	0.589532	0.00367398	0.742763	0.944131	0.59398	0.922382	0.342617	0.428212	0.495848	1	0.347066	1	0.153231	1	0.0044484	1	-0.148783	-0.46123	FALSE	HYPER	0	TRUE	HYPO	0	FALSE	0	0	FALSE	0	0
									KIAA1370	0.695927	-0.242215	2.75531e-07	-0.546999	0.000152272	-0.445676	1	-0.179625	0.188386	-0.304784	0.626601	-0.203461	1	0.0625893	1	0.101323	1	0.367373	0.97362	0.26605	-0.461098	FALSE	0	0	TRUE	HYPER	0	FALSE	0	0	FALSE	HYPO	0
x									MMP7	0.935649	0.189763	0.0124287	0.260161	0.00076832	0.368193	0.979656	0.252732	1	0.070398	0.680356	0.17843	1	0.0629688	1	0.108032	1	-0.00742919	1	-0.115461	-0.461054	FALSE	HYPER	0	TRUE	HYPO	0	FALSE	0	0	FALSE	0	0
									CANT1	1	-0.14718	0.022591	-0.226246	0.00343203	-0.304643	1	-0.169772	1	-0.0790661	0.747208	-0.157464	1	-0.0225926	1	-0.0783976	1	0.0564735	1	0.134871	-0.46098	FALSE	HYPO	0	TRUE	HYPER	HYPER	FALSE	0	0	FALSE	0	0
									TRAF1	1	-0.0208623	0.00573683	0.30816	3.54499e-05	0.483668	1	0.252303	0.131248	0.329022	0.00469718	0.50453	1	0.273165	1	0.175508	1	-0.0558568	1	-0.231365	-0.460359	FALSE	HYPER	0	FALSE	0	0	FALSE	HYPO	0	FALSE	0	0
									TMPO	1	0.0732812	0.000491812	0.304427	0.940008	0.0626468	0.262977	0.369142	0.246342	0.231146	1	-0.0106344	1	0.295861	0.136296	-0.24178	1	0.0647154	0.536103	0.306496	-0.460154	FALSE	0	0	TRUE	HYPO	HYPO	FALSE	0	0	TRUE	0	0
									SELPLG	1	-0.152195	0.000406126	0.462585	0.0050354	0.416627	1	0.258357	0.00467069	0.61478	0.00945986	0.568822	1	0.410552	1	-0.0459574	1	-0.204228	1	-0.15827	-0.460099	FALSE	0	0	FALSE	0	0	FALSE	HYPO	0	FALSE	HYPER	0
									KIF21B	1	0.0592058	8.80478e-06	0.41478	6.97146e-07	0.509448	1	0.150235	0.0421444	0.355574	0.00413614	0.450243	1	0.0910289	1	0.0946688	1	-0.264545	0.453612	-0.359214	-0.460066	FALSE	HYPER	0	FALSE	HYPO	0	FALSE	0	0	FALSE	0	0
									C5orf39	0.811046	0.400879	5.85198e-07	0.943723	3.54499e-05	0.859466	0.544465	0.667546	0.187434	0.542844	0.32358	0.458587	1	0.266667	1	-0.0842571	1	-0.276177	1	-0.19192	-0.459863	FALSE	0	0	TRUE	HYPO	HYPO	FALSE	0	0	FALSE	HYPER	0
									DOK7	1	0.00914291	0.0920487	-0.278425	0.323315	-0.229521	1	0.196388	0.543556	-0.287568	0.742066	-0.238664	1	0.187245	1	0.0489043	1	0.474813	0.702864	0.425908	-0.458984	FALSE	0	0	FALSE	0	0	FALSE	0	0	FALSE	HYPO	0
									C16orf45	1	-0.0868096	0.00357634	-0.231959	0.101239	-0.167957	0.195134	-0.353302	0.674945	-0.14515	1	-0.0811472	1	-0.266493	1	0.0640023	1	-0.121343	1	-0.185345	-0.458412	FALSE	0	0	TRUE	HYPER	0	FALSE	0	0	TRUE	0	0
									TPD52	0.740771	-0.212436	0.143364	-0.178893	7.29014e-05	-0.419162	1	-0.00196228	1	0.0335435	0.466452	-0.206725	1	0.210474	0.248771	-0.240269	1	0.176931	0.386284	0.4172	-0.457654	TRUE	HYPO	HYPO	TRUE	HYPER	HYPO	FALSE	0	0	FALSE	0	0
									VTCN1	1	0.0594207	0.134703	0.18522	0.0104627	0.29355	0.773965	0.299593	1	0.125799	0.341001	0.23413	1	0.240172	1	0.108331	1	0.114373	1	0.00604267	-0.457582	TRUE	0	0	TRUE	HYPO	HYPO	FALSE	0	0	FALSE	0	0
									EMP1	1	-0.00435884	1	0.00933603	0.021321	0.270489	1	0.0280123	1	0.0136949	0.176256	0.274848	1	0.0323711	0.180962	0.261153	1	0.0186762	0.995153	-0.242477	-0.457103	TRUE	HYPER	HYPER	TRUE	0	0	FALSE	HYPO	0	FALSE	0	0
									FXYD3	1	-0.118103	0.000801121	-0.330741	0.00912401	-0.29425	1	-0.0219444	0.47615	-0.212638	0.684758	-0.176148	1	0.0961584	1	0.0364906	1	0.308797	0.829077	0.272306	-0.456582	FALSE	0	0	TRUE	HYPER	0	FALSE	0	0	FALSE	HYPO	0
									ETNK2	0.684526	-0.191594	0.00196932	-0.265846	0.000446157	-0.325653	1	-0.199727	1	-0.0742519	0.823323	-0.134058	1	-0.0081329	1	-0.0598066	1	0.066119	1	0.125926	-0.456204	FALSE	HYPO	0	TRUE	HYPER	HYPER	FALSE	0	0	FALSE	0	0
									ITGA4	0.700874	0.260284	1.25352e-07	0.607092	7.12553e-07	0.62319	1	0.29032	0.145742	0.346808	0.0942266	0.362906	1	0.0300353	1	0.0160979	1	-0.316772	0.79064	-0.33287	-0.456122	FALSE	HYPER	0	TRUE	HYPO	0	FALSE	0	0	FALSE	0	0
									MX1	1	-0.00289291	0.00645701	0.305848	0.0124262	0.313799	1	0.261436	0.184146	0.308741	0.13547	0.316692	1	0.264329	1	0.00795104	1	-0.0444119	1	-0.052363	-0.455949	FALSE	0	0	TRUE	HYPO	0	FALSE	0	0	FALSE	HYPER	0
									PSCDBP	1	0.122094	0.0816298	0.218146	0.00877525	0.321698	1	0.181246	1	0.096052	0.637847	0.199604	1	0.0591515	1	0.103552	1	-0.0369005	1	-0.140452	-0.455442	TRUE	HYPER	0	TRUE	HYPO	HYPO	FALSE	0	0	FALSE	0	0
x									EGF	0.249898	-0.215717	0.110658	-0.136214	0.0193577	-0.193864	1	0.00992769	1	0.079503	1	0.0218536	1	0.225645	1	-0.0576494	1	0.146142	0.788249	0.203791	-0.454885	TRUE	0	0	TRUE	0	0	FALSE	HYPO	0	FALSE	0	0
									ERGIC1	0.119035	-0.348992	0.00050255	-0.345142	0.103249	-0.213811	0.812573	-0.287201	1	0.00384975	0.962547	0.135182	1	0.0617913	1	0.131332	1	0.0579416	1	-0.0733904	-0.454526	FALSE	0	0	TRUE	HYPER	HYPER	FALSE	HYPO	0	TRUE	0	0
									BCL11B	1	0.1123	3.34137e-08	0.673214	4.71931e-10	0.845783	0.160217	0.584584	0.00630751	0.560915	0.000279624	0.733483	1	0.472285	1	0.172568	1	-0.0886303	1	-0.261199	-0.45424	FALSE	HYPER	0	FALSE	HYPO	0	FALSE	0	0	FALSE	0	0
									GRHL2	1	0.314014	0.297618	0.27855	0.199982	-0.339585	0.606919	0.606768	1	-0.0354647	0.0379398	-0.653599	1	0.292754	0.0369997	-0.618134	1	0.328219	0.221933	0.946353	-0.453869	TRUE	HYPO	HYPO	FALSE	0	0	FALSE	0	0	FALSE	0	0
									HPDL	0.770886	0.1724	5.58637e-05	0.319593	0.003554	0.264068	1	0.197398	0.701218	0.147193	1	0.0916676	1	0.0249977	1	-0.0555253	1	-0.122195	1	-0.0666699	-0.453562	FALSE	0	0	TRUE	HYPO	HYPO	FALSE	0	0	FALSE	HYPER	0
									C3orf67	1	-0.00600147	0.963851	-0.0618986	0.0435678	-0.256159	1	0.121702	1	-0.0558972	0.310476	-0.250158	1	0.127703	0.749716	-0.19426	1	0.1836	0.491016	0.377861	-0.453193	TRUE	HYPO	HYPO	TRUE	0	0	FALSE	0	0	FALSE	0	0
									DCI	1	-0.1605	1.96989e-09	-0.688599	5.36766e-09	-0.728888	0.223712	-0.506204	0.00558207	-0.528099	0.0025248	-0.568387	1	-0.345704	1	-0.0402885	1	0.182395	1	0.222684	-0.452683	FALSE	HYPO	0	FALSE	HYPER	0	FALSE	0	0	FALSE	0	0
									RGL2	0.988926	-0.133731	0.00428349	-0.212834	0.0940633	-0.158839	1	-0.165802	1	-0.0791033	1	-0.0251085	1	-0.0320711	1	0.0539948	1	0.0470322	1	-0.00696259	-0.452666	FALSE	0	0	TRUE	HYPER	0	FALSE	0	0	TRUE	HYPO	0
									GRHL3	1	0.0881255	6.04542e-05	0.20538	1.36488e-06	0.270376	1	0.127308	0.422748	0.117255	0.0461508	0.18225	1	0.0391828	1	0.0649955	1	-0.0780718	0.831254	-0.143067	-0.452592	FALSE	HYPER	0	FALSE	HYPO	0	FALSE	0	0	FALSE	0	0
									NAT10	0.0978445	0.32047	0.000210221	0.322394	0.0323855	0.225715	0.786408	0.257688	1	0.00192385	1	-0.0947545	1	-0.0627817	1	-0.0966783	1	-0.0647056	1	0.0319728	-0.452288	FALSE	0	0	TRUE	HYPO	HYPO	FALSE	HYPER	0	FALSE	0	0
									TBX3	1	-0.106724	0.0805549	-0.21347	0.0120931	-0.303258	1	-0.139228	1	-0.106745	0.627033	-0.196534	1	-0.0325034	1	-0.0897885	1	0.074242	1	0.16403	-0.451993	TRUE	HYPO	0	TRUE	HYPER	0	FALSE	0	0	FALSE	0	0
									SSH3	1	-0.119788	5.81053e-05	-0.333974	1.48849e-06	-0.43724	0.910073	-0.225292	0.287825	-0.214186	0.0290773	-0.317452	1	-0.105505	1	-0.103266	1	0.108681	0.952157	0.211948	-0.450608	FALSE	HYPO	0	FALSE	HYPER	0	FALSE	0	0	FALSE	0	0
									MS4A15	1	-0.0533531	0.432521	-0.153624	0.000181209	-0.46328	1	-0.145477	1	-0.100271	0.0380521	-0.409927	1	-0.0921236	0.145517	-0.309656	1	0.00814732	0.825115	0.317804	-0.450005	TRUE	HYPO	HYPO	FALSE	HYPER	0	FALSE	0	0	FALSE	0	0
									C1orf78	1	-0.16029	0.000343939	-0.344362	0.0126977	-0.278596	0.76396	-0.291908	0.645909	-0.184072	1	-0.118306	1	-0.131618	1	0.0657664	1	0.0524545	1	-0.0133119	-0.449957	FALSE	0	0	TRUE	HYPER	HYPER	FALSE	0	0	FALSE	HYPO	0
									LOC196993	0.558581	-0.213044	1.24523e-07	-0.455289	1.33894e-09	-0.579486	1	-0.190027	0.203454	-0.242245	0.0125392	-0.366442	1	0.0230166	1	-0.124198	1	0.265261	0.352282	0.389459	-0.449924	FALSE	HYPO	0	FALSE	HYPER	0	FALSE	0	0	FALSE	0	0
									OSR1	0.991244	0.188034	0.00577281	0.292107	2.7182e-05	0.465724	1	0.130257	1	0.104073	0.18944	0.27769	1	-0.0577775	0.941274	0.173617	1	-0.16185	0.5981	-0.335468	-0.449855	FALSE	HYPER	0	TRUE	HYPO	0	FALSE	0	0	FALSE	0	0
									TRERF1	0.0185977	-0.480531	9.31626e-07	-0.518669	2.71709e-06	-0.544301	0.839307	-0.306223	1	-0.0381385	1	-0.0637698	1	0.174307	1	-0.0256314	1	0.212446	1	0.238077	-0.448656	FALSE	HYPO	0	TRUE	HYPER	0	FALSE	0	0	FALSE	0	0
									SP100	0.828711	-0.174364	0.927085	0.0582293	0.199982	0.158438	1	0.0469133	0.205266	0.232593	0.0204026	0.332802	1	0.221277	1	0.100209	1	-0.011316	1	-0.111525	-0.448456	TRUE	HYPER	HYPER	FALSE	0	0	TRUE	HYPO	0	FALSE	0	0
									USP22	1	-0.188474	0.0945277	-0.20781	0.00785458	-0.318045	0.689567	-0.331695	1	-0.0193361	1	-0.129571	1	-0.143221	1	-0.110235	1	-0.123885	1	-0.0136504	-0.448416	TRUE	0	0	TRUE	HYPER	0	FALSE	0	0	FALSE	0	0
									NUSAP1	1	-0.15633	0.583394	0.142699	0.732723	-0.131504	1	0.208152	0.324137	0.299029	1	0.0248255	1	0.364482	0.386572	-0.274204	1	0.0654527	0.825115	0.339657	-0.448322	FALSE	0	0	FALSE	0	0	FALSE	HYPO	0	FALSE	0	0
									LRBA	1	-0.0229315	0.679822	-0.0896669	0.091043	-0.186223	1	0.160691	1	-0.0667353	0.593453	-0.163291	1	0.183623	1	-0.0965562	1	0.250358	0.388088	0.346914	-0.447857	FALSE	HYPO	0	FALSE	0	0	FALSE	0	0	FALSE	0	0
									C17orf58	1	-0.0255973	0.214985	-0.152538	0.000604773	-0.342639	1	-0.199813	0.981934	-0.12694	0.0479051	-0.317042	1	-0.174215	0.52054	-0.190102	1	-0.0472748	1	0.142827	-0.447684	TRUE	HYPO	HYPO	FALSE	HYPER	0	FALSE	0	0	FALSE	0	0
									SCARB2	0.104292	-0.384082	0.165228	-0.189818	0.88003	-0.0898746	1	-0.0496771	0.703053	0.194264	0.175133	0.294207	1	0.334405	1	0.0999437	1	0.140141	1	0.0401975	-0.447676	FALSE	0	0	FALSE	HYPER	0	FALSE	HYPO	0	FALSE	0	0
									VLDLR	0.216379	0.289366	1.26848e-08	0.519984	1.94545e-08	0.560557	1	0.114587	0.299726	0.230617	0.126674	0.271191	1	-0.17478	1	0.0405738	1	-0.405397	0.288343	-0.445971	-0.447606	FALSE	HYPER	0	TRUE	HYPO	0	FALSE	0	0	FALSE	0	0
x									SMO	0.301784	0.240865	3.05892e-06	0.380168	2.17679e-06	0.423284	1	0.18596	0.806886	0.139303	0.420956	0.182418	1	-0.0549058	1	0.0431155	1	-0.194209	0.79064	-0.237324	-0.447603	FALSE	HYPER	0	TRUE	HYPO	0	FALSE	0	0	FALSE	0	0
									THRA	0.158041	-0.260789	1	0.0069945	0.846904	-0.0705294	1	-0.172239	0.071177	0.267784	0.299768	0.19026	1	0.0885509	1	-0.0775239	1	-0.179233	1	-0.101709	-0.447429	FALSE	0	0	FALSE	HYPER	0	FALSE	HYPO	0	FALSE	0	0
									PXMP4	0.0294402	-0.620971	0.000794845	-0.489863	3.17743e-05	-0.656189	0.440829	-0.540746	1	0.131108	1	-0.0352179	1	0.0802253	1	-0.166326	1	-0.0508824	1	0.115443	-0.447234	FALSE	HYPO	0	TRUE	HYPER	0	FALSE	0	0	FALSE	0	0
									FZD4	0.0186236	-0.287179	0.01611	-0.163731	0.577868	-0.0829153	0.666927	-0.208538	0.63863	0.123447	0.0844822	0.204263	1	0.0786406	1	0.0808158	1	-0.0448069	1	-0.125623	-0.446737	FALSE	0	0	TRUE	HYPER	HYPER	FALSE	HYPO	0	FALSE	0	0
									ASB13	0.223194	-0.304267	1.28942e-06	-0.462091	1.79016e-08	-0.595432	0.900279	-0.262649	0.844933	-0.157824	0.117014	-0.291165	1	0.0416177	1	-0.133341	1	0.199441	0.543289	0.332783	-0.446539	FALSE	HYPO	0	TRUE	HYPER	0	FALSE	0	0	FALSE	0	0
					X				C6orf145	1	0.0831849	0.0627578	0.259181	0.00394351	0.395936	1	0.0593114	0.957497	0.175996	0.246427	0.312751	1	-0.0238734	1	0.136756	1	-0.199869	0.829766	-0.336625	-0.446325	TRUE	HYPER	HYPER	TRUE	HYPO	HYPER	FALSE	0	0	FALSE	0	0
									LRMP	0.496111	0.418439	5.5924e-07	0.815722	8.46872e-06	0.795364	0.399223	0.627209	0.3522	0.397283	0.377331	0.376925	1	0.20877	1	-0.0203579	1	-0.188513	1	-0.168155	-0.445425	FALSE	0	0	TRUE	HYPO	HYPO	FALSE	0	0	FALSE	HYPER	0
									SLC40A1	0.971972	-0.129297	0.000876478	-0.231908	0.452842	-0.100989	0.675721	-0.222775	0.937154	-0.102611	1	0.028308	1	-0.0934779	0.733781	0.130919	1	0.00913271	1	-0.121786	-0.444601	FALSE	0	0	TRUE	HYPER	HYPER	FALSE	0	0	TRUE	HYPO	0
									LIMK2	1	0.0296374	0.11095	0.0983676	0.00790012	0.154902	0.856936	0.142834	1	0.0687303	0.289867	0.125264	1	0.113197	1	0.056534	1	0.0444666	1	-0.0120674	-0.444262	TRUE	HYPER	HYPER	TRUE	HYPO	0	FALSE	0	0	FALSE	0	0
									TRIM45	1	0.0988087	0.0671247	-0.141863	0.00764654	-0.205596	1	-0.108692	0.0564688	-0.240672	0.00688276	-0.304404	1	-0.2075	1	-0.0637323	1	0.0331716	1	0.0969039	-0.444085	TRUE	HYPO	0	FALSE	0	0	FALSE	HYPER	0	FALSE	0	0
									NUDT13	1	-0.0924343	0.00182426	-0.353317	0.00535493	-0.352885	0.872016	-0.308571	0.38271	-0.260883	0.350566	-0.260451	1	-0.216137	1	0.000431365	1	0.0447455	1	0.0443141	-0.443395	FALSE	0	0	TRUE	HYPER	0	FALSE	0	0	FALSE	HYPO	0
									IRX1	0.0176716	0.805871	2.01081e-07	0.919697	9.75419e-07	0.948776	0.223712	0.792679	1	0.113826	1	0.142905	1	-0.013192	1	0.0290788	1	-0.127018	1	-0.156097	-0.443386	FALSE	HYPER	0	TRUE	HYPO	0	FALSE	0	0	FALSE	0	0
									ZC3HAV1L	0.99538	0.187435	0.00740397	0.284629	1	0.0255481	1	0.116266	1	0.0971937	0.826189	-0.161887	1	-0.0711693	0.220725	-0.259081	1	-0.168363	1	0.0907178	-0.443153	FALSE	0	0	TRUE	HYPO	0	FALSE	0	0	TRUE	HYPER	HYPER
									SOX10	0.181373	0.32736	0.15603	0.181278	0.0172597	0.279802	0.489968	0.363658	0.950847	-0.146082	1	-0.0475583	1	0.0362984	1	0.0985233	1	0.18238	1	0.0838567	-0.443094	TRUE	0	0	TRUE	HYPO	0	FALSE	0	0	FALSE	0	0
									ACADSB	1	0.0669386	0.036449	-0.291978	0.00429947	-0.409762	1	-0.312493	0.187434	-0.358916	0.0295006	-0.4767	1	-0.379432	1	-0.117784	1	-0.0205155	1	0.0972685	-0.442432	FALSE	HYPO	0	FALSE	0	0	FALSE	HYPER	0	FALSE	0	0
									ALG8	1	-0.172728	0.00658789	-0.291755	0.00417836	-0.335296	0.284687	-0.428722	1	-0.119027	0.833042	-0.162568	1	-0.255994	1	-0.0435412	1	-0.136967	1	-0.0934254	-0.441463	FALSE	0	0	TRUE	HYPER	0	FALSE	0	0	FALSE	0	0
									LIPG	1	0.0678434	0.00325774	0.35093	0.000104503	0.491739	1	0.0587542	0.337821	0.283087	0.0365421	0.423896	1	-0.00908927	1	0.140809	1	-0.292176	0.465471	-0.432985	-0.441275	FALSE	HYPER	0	FALSE	HYPO	0	FALSE	0	0	FALSE	0	0
									CCNG2	0.994733	-0.162838	3.316e-05	-0.362998	0.00450612	-0.285399	1	-0.101587	0.426004	-0.20016	0.952266	-0.122561	1	0.0612507	1	0.077599	1	0.261411	1	0.183812	-0.440974	FALSE	0	0	TRUE	HYPER	HYPER	FALSE	0	0	FALSE	HYPO	0
									RAB7L1	0.857989	0.183356	1.18807e-05	0.388849	9.09415e-06	0.433398	1	0.18102	0.414577	0.205493	0.175133	0.250041	1	-0.00233642	1	0.0445485	1	-0.207829	0.825115	-0.252378	-0.440878	FALSE	HYPER	0	TRUE	HYPO	HYPER	FALSE	0	0	FALSE	0	0
									FAAH	0.613963	-0.187066	3.71082e-05	-0.321477	0.000493053	-0.302795	1	-0.163035	0.796346	-0.134411	0.902568	-0.11573	1	0.0240306	1	0.0186815	1	0.158442	1	0.13976	-0.44046	FALSE	0	0	TRUE	HYPER	0	FALSE	0	0	FALSE	HYPO	0
									SCRG1	0.0785387	0.191725	0.0046191	0.146831	0.00123671	0.180497	0.666927	0.163354	1	-0.0448941	1	-0.0112277	1	-0.0283713	1	0.0336664	1	0.0165228	1	-0.0171436	-0.440338	FALSE	0	0	TRUE	HYPO	0	FALSE	HYPER	0	FALSE	0	0
									HPN	0.849184	-0.16954	0.00080488	-0.279741	0.00982789	-0.246879	1	-0.0483564	1	-0.110201	1	-0.0773397	1	0.121183	1	0.0328613	1	0.231384	1	0.198523	-0.440208	FALSE	0	0	TRUE	HYPER	HYPER	FALSE	0	0	FALSE	HYPO	0
		X							HEY2	0.0978445	0.598336	1.06113e-07	0.859713	0.000115492	0.686352	0.882829	0.448077	0.864594	0.261377	1	0.0880167	1	-0.150258	1	-0.173361	1	-0.411636	1	-0.238275	-0.440063	FALSE	0	0	TRUE	HYPO	0	FALSE	0	0	FALSE	HYPER	0
									SQLE	1	0.0419615	0.000794845	0.39598	0.999955	0.0512691	1	0.0198891	0.13938	0.354019	1	0.00930765	1	-0.0220723	0.123433	-0.344711	1	-0.376091	1	-0.03138	-0.439982	FALSE	0	0	TRUE	HYPO	HYPO	FALSE	0	0	TRUE	HYPER	0
			X						HSD17B4	1	-0.0471272	2.40849e-05	-0.411557	1.65882e-05	-0.461994	0.996289	-0.24876	0.0449804	-0.36443	0.0127706	-0.414866	1	-0.201633	1	-0.0504364	1	0.162797	1	0.213233	-0.439858	FALSE	HYPO	0	FALSE	HYPER	0	FALSE	0	0	FALSE	0	0
									TMEM38A	0.591081	0.237424	0.0065864	0.278638	0.00788607	0.301128	1	0.037434	1	0.041214	1	0.0637047	1	-0.19999	1	0.0224907	1	-0.241204	0.881216	-0.263694	-0.439708	FALSE	HYPER	0	TRUE	HYPO	HYPO	FALSE	0	0	FALSE	0	0
									GSTM2	1	-0.0487665	4.69698e-05	-0.219831	0.174556	-0.106208	0.210273	-0.245626	0.116303	-0.171064	1	-0.0574418	1	-0.196859	0.539006	0.113623	1	-0.0257948	0.940822	-0.139417	-0.43953	FALSE	0	0	TRUE	HYPER	HYPER	FALSE	0	0	TRUE	0	0
			X						PISD	0.789398	-0.160793	0.00475799	-0.22072	0.00138744	-0.269637	0.594895	-0.256374	1	-0.0599271	0.920391	-0.108844	1	-0.0955814	1	-0.0489168	1	-0.0356543	1	0.0132625	-0.439386	FALSE	HYPO	0	TRUE	HYPER	0	FALSE	0	0	FALSE	0	0
									AGR2	1	-0.098448	1.16038e-05	-0.459269	3.26637e-07	-0.588886	1	-0.0660372	0.0774155	-0.360821	0.00554633	-0.490438	1	0.0324108	1	-0.129617	1	0.393232	0.277076	0.522849	-0.439361	FALSE	HYPO	0	FALSE	HYPER	0	FALSE	0	0	FALSE	0	0
									LRIG3	1	0.107751	8.51212e-06	0.43312	4.15237e-07	0.541418	1	0.200687	0.0926089	0.325369	0.00880128	0.433667	1	0.0929353	1	0.108298	1	-0.232434	0.541862	-0.340732	-0.439356	FALSE	HYPER	0	FALSE	HYPO	0	FALSE	0	0	FALSE	0	0
									ECE1	0.191663	-0.181154	6.2307e-06	-0.249649	0.0021623	-0.192552	0.0825593	-0.291518	1	-0.0684945	1	-0.0113981	1	-0.110364	1	0.0570964	1	-0.0418694	1	-0.0989658	-0.438821	FALSE	0	0	TRUE	HYPER	HYPER	FALSE	0	0	FALSE	0	0
									KCTD21	1	0.0754303	0.00375627	-0.415639	0.000328616	-0.549892	0.696344	-0.441391	0.0623663	-0.491069	0.00750537	-0.625322	1	-0.516821	1	-0.134253	1	-0.0257519	1	0.108501	-0.437787	FALSE	HYPO	0	FALSE	0	0	FALSE	HYPER	0	FALSE	0	0
									TRIB2	1	-0.0164732	0.000472756	0.40465	0.000231646	0.465898	1	0.214264	0.0485909	0.421123	0.0133764	0.482372	1	0.230737	1	0.0612485	1	-0.190386	1	-0.251634	-0.437575	FALSE	HYPER	0	FALSE	0	0	FALSE	HYPO	0	FALSE	0	0
									AVPI1	1	0.103033	0.00619637	0.187336	0.00254734	0.223412	1	0.00241655	1	0.0843032	0.667681	0.120379	1	-0.100616	1	0.0360758	1	-0.184919	0.571295	-0.220995	-0.437411	FALSE	HYPER	0	TRUE	HYPO	HYPER	FALSE	0	0	FALSE	0	0
									CBX2	1	-0.104021	0.0396362	0.256186	0.967878	0.0703272	1	0.0551202	0.105422	0.360207	0.846207	0.174348	1	0.159141	1	-0.185859	1	-0.201066	1	-0.015207	-0.43722	FALSE	0	0	TRUE	0	0	FALSE	HYPO	0	TRUE	HYPER	0
									ANP32B	3.14083e-07	0.464395	2.49775e-11	0.521961	2.29311e-11	0.524227	0.00222817	0.425404	1	0.0575665	1	0.059832	1	-0.0389905	1	0.00226556	1	-0.0965569	1	-0.0988225	-0.436974	FALSE	0	0	TRUE	HYPO	0	FALSE	0	0	FALSE	HYPER	0
									IL17RD	0.289257	0.29867	0.0148654	0.26077	2.58099e-05	0.463215	1	0.225519	1	-0.0378997	0.799216	0.164545	1	-0.0731516	0.615414	0.202445	1	-0.0352518	1	-0.237697	-0.436842	FALSE	HYPER	0	TRUE	HYPO	0	FALSE	0	0	FALSE	0	0
									KRT19	1	-0.152165	0.244351	-0.188567	0.00178119	-0.403691	1	-0.0820876	1	-0.0364024	0.437131	-0.251526	1	0.0700771	0.772617	-0.215124	1	0.106479	0.829077	0.321603	-0.436613	TRUE	HYPO	HYPO	TRUE	HYPER	HYPO	FALSE	0	0	FALSE	0	0
									EML4	1	0.104165	5.56047e-05	0.251691	0.000927739	0.231856	1	0.0404066	0.387122	0.147526	0.536734	0.127692	1	-0.063758	1	-0.0198346	1	-0.211285	0.718256	-0.19145	-0.436375	FALSE	0	0	TRUE	HYPO	0	FALSE	0	0	FALSE	HYPER	0
									CYHR1	1	-0.0414565	0.148211	-0.252197	0.00496239	-0.439608	1	-0.0661603	0.913891	-0.21074	0.143965	-0.398152	1	-0.0247038	1	-0.187411	1	0.186037	0.8572	0.373448	-0.435821	TRUE	HYPO	0	TRUE	HYPER	0	FALSE	0	0	FALSE	0	0
									VAV3	0.367475	-0.229192	0.00210976	-0.259889	9.86149e-05	-0.352088	1	-0.202	1	-0.0306969	0.891435	-0.122896	1	0.0271924	1	-0.0921987	1	0.0578892	1	0.150088	-0.435632	FALSE	HYPO	0	TRUE	HYPER	0	FALSE	0	0	FALSE	0	0
									YWHAQ	0.188693	0.228093	1.87052e-05	0.296441	0.000485869	0.269862	1	0.148418	1	0.0683483	1	0.0417695	1	-0.0796745	1	-0.0265788	1	-0.148023	1	-0.121444	-0.435337	FALSE	0	0	TRUE	HYPO	0	FALSE	0	0	FALSE	HYPER	0
									MPP6	0.0467026	0.376976	1.04937e-05	0.402925	0.000116209	0.390361	0.891052	0.253147	1	0.0259493	1	0.0133857	1	-0.123829	1	-0.0125637	1	-0.149778	1	-0.137214	-0.434851	FALSE	0	0	TRUE	HYPO	0	FALSE	0	0	FALSE	HYPER	0
									HCLS1	1	0.0498901	0.0340971	0.154319	0.0068485	0.205312	1	0.0998252	0.886325	0.104429	0.349137	0.155422	1	0.0499351	1	0.0509923	1	-0.0544943	1	-0.105487	-0.434616	FALSE	HYPER	0	TRUE	HYPO	0	FALSE	0	0	FALSE	0	0
									SPG20	0.244407	0.646786	0.420576	0.287896	0.0201336	0.575475	1	0.222616	0.788389	-0.358889	1	-0.0713104	1	-0.42417	1	0.287579	1	-0.0652803	1	-0.352859	-0.434583	TRUE	0	0	TRUE	HYPO	HYPER	FALSE	HYPER	0	FALSE	0	0
									NOSTRIN	1	-0.101213	0.00262579	-0.178142	0.144736	-0.117279	1	-0.0473644	1	-0.0769295	1	-0.0160668	1	0.0538482	1	0.0608627	1	0.130778	1	0.069915	-0.434321	FALSE	0	0	TRUE	HYPER	HYPER	FALSE	0	0	TRUE	HYPO	0
									ALDH3B2	1	-0.119746	0.385461	-0.109267	0.00266951	-0.259916	1	-0.0696461	1	0.010479	0.671825	-0.14017	1	0.0500999	0.660813	-0.150649	1	0.039621	0.97362	0.19027	-0.434176	TRUE	HYPO	HYPO	TRUE	HYPER	HYPO	FALSE	0	0	FALSE	0	0
									TSPAN15	0.240561	-0.319329	0.0100705	-0.278036	0.0866057	-0.229914	0.987635	-0.261225	1	0.0412935	1	0.0894152	1	0.0581045	1	0.0481218	1	0.016811	1	-0.0313107	-0.43416	FALSE	0	0	TRUE	HYPER	HYPO	FALSE	HYPO	0	TRUE	0	0
									CD74	1	-0.0333977	1	0.0339674	0.0201805	0.298771	1	0.0446263	1	0.0673651	0.107377	0.332168	1	0.078024	0.274009	0.264803	1	0.0106589	1	-0.254144	-0.433781	TRUE	HYPER	HYPER	TRUE	0	0	FALSE	HYPO	0	FALSE	0	0
x									TGFB3	0.0756239	-0.494251	7.21048e-05	-0.504825	0.000694178	-0.481516	0.666927	-0.417761	1	-0.0105741	1	0.0127352	1	0.0764902	1	0.0233093	1	0.0870643	1	0.063755	-0.43366	FALSE	0	0	TRUE	HYPER	0	FALSE	0	0	FALSE	HYPO	0
									DYRK2	0.505135	0.225409	1.24523e-07	0.467218	0.00204869	0.308119	0.818115	0.258198	0.226812	0.241809	1	0.0827099	1	0.0327886	0.856229	-0.159099	1	-0.20902	1	-0.0499213	-0.432111	FALSE	0	0	TRUE	HYPO	HYPER	FALSE	0	0	FALSE	HYPER	0
									EPN2	1	-0.0266849	0.00995961	-0.203538	0.115751	-0.159572	0.544465	-0.263287	0.381897	-0.176853	0.711109	-0.132887	1	-0.236602	1	0.043966	1	-0.0597488	1	-0.103715	-0.43185	FALSE	0	0	TRUE	HYPER	HYPER	FALSE	0	0	TRUE	0	0
									PPP1R16B	1	0.214601	0.000268676	0.430113	1.78932e-05	0.551349	0.901572	0.320073	0.709296	0.215512	0.155479	0.336748	1	0.105472	1	0.121235	1	-0.110041	1	-0.231276	-0.431804	FALSE	HYPER	0	TRUE	HYPO	0	FALSE	0	0	FALSE	0	0
									FZD7	0.0756239	0.505712	0.0116527	0.348607	0.000254775	0.527572	1	0.132707	1	-0.157105	1	0.0218595	1	-0.373005	1	0.178964	1	-0.2159	0.730657	-0.394864	-0.431671	FALSE	HYPER	0	TRUE	HYPO	HYPER	FALSE	0	0	FALSE	0	0
									NTN4	0.771138	-0.302349	0.0181	-0.354326	1	0.0307878	1	-0.292155	1	-0.0519766	0.338973	0.333137	1	0.0101944	0.145804	0.385114	1	0.0621711	1	-0.322942	-0.430909	FALSE	HYPER	0	TRUE	0	0	FALSE	0	0	TRUE	HYPO	0
									ABCA3	1	0.0182148	0.000150261	-0.276544	4.46936e-05	-0.32583	0.8777	-0.202271	0.0240272	-0.294759	0.00469718	-0.344045	1	-0.220486	1	-0.049286	1	0.0742734	1	0.123559	-0.430554	FALSE	HYPO	0	FALSE	0	0	FALSE	HYPER	0	FALSE	0	0
									GPR126	0.27381	0.249771	0.00072837	0.283311	0.078211	0.188898	0.304788	0.339381	1	0.0335396	1	-0.0608733	1	0.0896101	1	-0.0944129	1	0.0560705	1	0.150483	-0.429695	FALSE	0	0	TRUE	HYPO	HYPO	FALSE	0	0	TRUE	0	0
									NOD2	0.251771	0.286961	0.000480698	0.328147	1.15567e-05	0.445855	1	0.138276	1	0.0411854	0.753483	0.158894	1	-0.148686	1	0.117709	1	-0.189871	0.598108	-0.30758	-0.429519	FALSE	HYPER	0	TRUE	HYPO	0	FALSE	0	0	FALSE	0	0
									JMJD2B	1	-0.0463485	0.0128643	-0.236394	0.000660224	-0.33928	0.690642	-0.286369	0.51693	-0.190046	0.0762302	-0.292932	1	-0.24002	1	-0.102886	1	-0.0499744	1	0.0529118	-0.428952	FALSE	HYPO	0	TRUE	HYPER	0	FALSE	0	0	FALSE	0	0
									CAP2	1	-0.0197309	0.000722997	-0.244701	0.122795	-0.150439	0.779207	-0.212894	0.116933	-0.22497	0.673353	-0.130708	1	-0.193163	1	0.0942616	1	0.0318065	1	-0.0624551	-0.428135	FALSE	0	0	TRUE	HYPER	0	FALSE	0	0	TRUE	HYPO	0
									TIGD2	0.902701	0.130564	0.000717113	0.22666	0.00923089	0.199692	1	0.0823509	0.960266	0.0960961	1	0.0691285	1	-0.048213	1	-0.0269676	1	-0.144309	1	-0.117342	-0.427696	FALSE	0	0	TRUE	HYPO	0	FALSE	0	0	FALSE	HYPER	0
									FJX1	1	0.09524	0.00838243	0.278056	0.0601183	0.238933	1	0.194006	0.718469	0.182816	0.928139	0.143693	1	0.098766	1	-0.039123	1	-0.0840503	1	-0.0449273	-0.427221	FALSE	0	0	TRUE	HYPO	0	FALSE	0	0	TRUE	HYPER	HYPER
									MGC23985	1	0.0619965	0.0010221	0.163969	0.0514403	0.119781	0.452853	0.182865	0.546645	0.101973	1	0.0577847	1	0.120869	1	-0.0441882	1	0.0188959	1	0.0630841	-0.427065	FALSE	0	0	TRUE	HYPO	HYPO	FALSE	0	0	TRUE	0	0
									FBXO5	1	0.0785172	0.000668459	0.222609	0.242909	0.116758	0.553099	0.22567	0.448277	0.144091	1	0.0382408	1	0.147153	1	-0.105851	1	0.00306162	1	0.108912	-0.427043	FALSE	0	0	TRUE	HYPO	HYPO	FALSE	0	0	TRUE	HYPER	0
									HDAC11	1	0.069663	0.0089395	-0.211307	6.32862e-06	-0.37819	1	-0.120589	0.0499186	-0.28097	0.000372307	-0.447853	1	-0.190252	0.469162	-0.166883	1	0.0907185	0.578288	0.257602	-0.426913	FALSE	HYPO	0	FALSE	0	0	FALSE	HYPER	0	FALSE	0	0
									VAMP1	0.0375491	-0.4258	1.99061e-05	-0.430886	0.00141285	-0.364554	0.223712	-0.450076	1	-0.00508535	1	0.0612463	1	-0.0242756	1	0.0663316	1	-0.0191903	1	-0.0855219	-0.426775	FALSE	0	0	TRUE	HYPER	0	FALSE	0	0	FALSE	0	0
									TAP1	1	0.031576	0.000625847	0.367318	0.179547	0.206531	1	0.213071	0.115024	0.335742	0.792967	0.174955	1	0.181495	1	-0.160787	1	-0.154246	1	0.00654022	-0.426506	FALSE	0	0	TRUE	HYPO	HYPO	FALSE	0	0	TRUE	HYPER	HYPO
									WARS	0.649614	0.195339	0.000206625	0.311928	1.5733e-07	0.480895	0.614549	0.282807	0.99399	0.116589	0.0583783	0.285556	1	0.0874677	0.615414	0.168968	1	-0.029121	1	-0.198089	-0.425935	FALSE	HYPER	0	TRUE	HYPO	HYPO	FALSE	0	0	FALSE	0	0
									CYYR1	0.606406	0.34041	0.00141582	0.463075	3.44751e-05	0.644267	0.992642	0.361081	1	0.122665	0.469745	0.303857	1	0.0206712	1	0.181192	1	-0.101994	1	-0.283186	-0.425523	FALSE	HYPER	0	TRUE	HYPO	0	FALSE	0	0	FALSE	0	0
									HLA-C	1	0.0352952	0.348488	0.140731	0.00367398	0.314099	1	0.156885	1	0.105435	0.138558	0.278804	1	0.121589	0.829533	0.173368	1	0.016154	1	-0.157215	-0.42512	TRUE	HYPER	HYPER	TRUE	HYPO	0	FALSE	0	0	FALSE	0	0
									C12orf60	1	-0.0346631	0.558941	-0.123984	0.00242175	-0.349883	1	0.0596136	1	-0.0893204	0.105018	-0.31522	1	0.0942768	0.430913	-0.2259	1	0.183597	0.413219	0.409497	-0.424033	TRUE	HYPO	HYPO	TRUE	0	0	FALSE	0	0	FALSE	0	0
									FGF11	0.0771571	0.257425	5.6001e-08	0.362279	1.07419e-09	0.450734	0.839319	0.191357	0.894644	0.104854	0.146873	0.193309	1	-0.0660681	1	0.0884551	1	-0.170922	0.441907	-0.259377	-0.423879	FALSE	HYPER	0	TRUE	HYPO	0	FALSE	0	0	FALSE	0	0
									GLIPR1	0.172859	0.367785	2.22764e-06	0.520456	3.94017e-07	0.613449	0.895629	0.303531	1	0.152671	0.424131	0.245664	1	-0.0642543	1	0.0929924	1	-0.216925	0.829077	-0.309918	-0.423519	FALSE	HYPER	0	TRUE	HYPO	0	FALSE	0	0	FALSE	0	0
									TLCD1	1	-0.130321	1	0.0273676	0.0864886	-0.288376	1	0.0794804	1	0.157688	1	-0.158055	1	0.209801	0.271243	-0.315744	1	0.0521127	0.801397	0.367856	-0.423508	FALSE	HYPO	0	FALSE	0	0	FALSE	0	0	FALSE	0	0
									PANX1	1	-0.029617	1.70369e-05	0.420859	0.0012168	0.357315	1	0.114983	0.00707037	0.450476	0.0233177	0.386932	1	0.1446	1	-0.0635432	1	-0.305875	0.996515	-0.242332	-0.423239	FALSE	0	0	FALSE	0	0	FALSE	HYPO	0	FALSE	HYPER	0
x									STAT5A	1	-0.00833119	0.314358	0.208817	0.00609646	0.430187	1	-0.0152449	0.882833	0.217149	0.083296	0.438518	1	-0.0069137	1	0.22137	1	-0.224062	0.611316	-0.445432	-0.42302	TRUE	HYPER	HYPER	TRUE	0	0	FALSE	0	0	FALSE	0	0
									WDR35	0.539954	0.223098	0.225464	-0.149779	0.000316865	-0.355827	1	-0.0683833	0.0186155	-0.372877	0.000101015	-0.578924	1	-0.291481	0.363391	-0.206047	1	0.0813962	0.631807	0.287444	-0.422803	FALSE	HYPO	0	FALSE	0	0	FALSE	HYPER	0	FALSE	0	0
									BCL2L1	0.0235364	-0.322359	1.65132e-05	-0.312167	0.000401642	-0.286075	0.466845	-0.269793	1	0.0101923	1	0.0362843	1	0.0525661	1	0.026092	1	0.0423738	1	0.0162818	-0.422755	FALSE	0	0	TRUE	HYPER	HYPER	FALSE	HYPO	0	FALSE	0	0
									KLHL21	0.871115	0.278233	0.000167461	0.519194	0.00173696	0.485255	1	0.121608	0.772669	0.240961	0.886653	0.207022	1	-0.156625	1	-0.0339388	1	-0.397586	0.906424	-0.363647	-0.422629	FALSE	0	0	TRUE	HYPO	0	FALSE	0	0	FALSE	HYPER	0
									MYST4	0.181373	-0.280046	1.06092e-06	-0.411755	0.000128931	-0.358122	0.643406	-0.283693	0.91067	-0.13171	1	-0.078076	1	-0.00364738	1	0.0536337	1	0.128062	1	0.0744286	-0.422274	FALSE	0	0	TRUE	HYPER	0	FALSE	0	0	FALSE	HYPO	0
									SPOCK2	0.372365	0.195099	3.90696e-09	0.418917	9.70075e-10	0.477884	0.0440156	0.40327	0.113318	0.223818	0.0194097	0.282785	1	0.208171	1	0.0589668	1	-0.015647	1	-0.0746139	-0.421867	FALSE	HYPER	0	FALSE	HYPO	0	FALSE	0	0	FALSE	0	0
									XBP1	1	-0.117322	0.0145582	-0.2223	0.000409127	-0.334456	1	-0.0389503	1	-0.104978	0.266918	-0.217134	1	0.0783721	1	-0.112156	1	0.18335	0.543289	0.295506	-0.421731	FALSE	HYPO	0	TRUE	HYPER	0	FALSE	0	0	FALSE	0	0
									EPB41L2	0.176366	0.223587	0.000202897	0.251822	1.54271e-05	0.319307	1	0.0674313	1	0.0282354	0.937206	0.0957201	1	-0.156156	1	0.0674847	1	-0.184391	0.471201	-0.251876	-0.421476	FALSE	HYPER	0	TRUE	HYPO	0	FALSE	0	0	FALSE	0	0
									CRKRS	0.035149	-0.315666	0.88642	0.0583461	1	-0.0305653	1	0.00953117	0.00242484	0.374012	0.0286467	0.285101	1	0.325197	1	-0.0889114	1	-0.0488149	1	0.0400965	-0.421452	FALSE	0	0	FALSE	0	0	TRUE	HYPO	HYPO	FALSE	HYPER	0
									LIMD2	1	-0.0202057	0.0257532	0.331909	0.00536554	0.436124	0.731391	0.427772	0.283826	0.352115	0.0665734	0.45633	1	0.447977	1	0.104216	1	0.0958629	1	-0.00835268	-0.421114	FALSE	HYPER	0	TRUE	0	0	FALSE	HYPO	0	FALSE	0	0
									GPR77	1	-0.0576171	0.00720338	-0.40385	5.84885e-05	-0.631489	0.752815	-0.439903	0.356135	-0.346232	0.01961	-0.573872	1	-0.382286	1	-0.22764	1	-0.0360536	1	0.191586	-0.421076	FALSE	HYPO	0	FALSE	HYPER	0	FALSE	0	0	FALSE	0	0
									CELSR2	1	-0.0976592	0.0120829	-0.294157	0.000104207	-0.471767	0.666927	-0.362585	0.753734	-0.196498	0.0615253	-0.374108	1	-0.264926	1	-0.177611	1	-0.0684286	1	0.109182	-0.420855	FALSE	HYPO	0	TRUE	HYPER	HYPER	FALSE	0	0	FALSE	0	0
									SGCB	0.134241	0.295276	0.791177	0.0786981	1	-0.0233253	1	-0.0656338	0.294352	-0.216578	0.0321451	-0.318601	1	-0.36091	1	-0.102023	1	-0.144332	1	-0.0423085	-0.420661	TRUE	0	0	FALSE	0	0	TRUE	HYPER	HYPER	FALSE	0	0
							X		CDH3	1	0.0869805	0.000269897	0.265899	4.86072e-07	0.398726	1	0.0215349	0.333794	0.178919	0.0113844	0.311745	1	-0.0654456	0.823796	0.132826	1	-0.244364	0.240883	-0.377191	-0.420521	FALSE	HYPER	0	FALSE	HYPO	0	FALSE	0	0	FALSE	0	0
									RAB8B	1	0.0685116	0.0220864	0.20035	0.00215567	0.28004	1	0.172064	0.853961	0.131838	0.23688	0.211529	1	0.103552	1	0.0796906	1	-0.0282857	1	-0.107976	-0.420468	FALSE	HYPER	0	TRUE	HYPO	0	FALSE	0	0	FALSE	0	0
									RDH10	0.263157	0.327328	0.00503466	0.313776	0.213611	0.200685	1	0.144391	1	-0.0135523	1	-0.126643	1	-0.182937	1	-0.113091	1	-0.169385	1	-0.0562943	-0.420371	FALSE	0	0	TRUE	HYPO	HYPO	FALSE	HYPER	0	TRUE	0	0
									USP35	1	-0.0141774	0.134099	-0.247293	0.0143344	-0.378233	1	-0.240667	0.754948	-0.233115	0.181282	-0.364055	1	-0.22649	1	-0.13094	1	0.00662578	1	0.137566	-0.419773	TRUE	HYPO	0	TRUE	HYPER	HYPER	FALSE	0	0	FALSE	0	0
		X							FAM78A	1	-0.0552849	0.0652959	0.246504	0.00296936	0.388749	1	0.165583	0.266651	0.301789	0.0269015	0.444034	1	0.220868	1	0.142245	1	-0.0809216	1	-0.223167	-0.419305	TRUE	HYPER	HYPER	FALSE	0	0	FALSE	HYPO	0	FALSE	0	0
									FNDC3B	0.371792	0.263068	8.51212e-06	0.419512	4.62065e-06	0.474152	0.717852	0.299604	0.84042	0.156444	0.420956	0.211084	1	0.0365358	1	0.0546394	1	-0.119908	1	-0.174548	-0.419278	FALSE	HYPER	0	TRUE	HYPO	HYPER	FALSE	0	0	FALSE	0	0
									TRAK1	1	-0.0472334	2.41245e-06	-0.27114	5.17208e-05	-0.256909	0.872016	-0.161812	0.0350941	-0.223907	0.0401076	-0.209676	1	-0.114579	1	0.0142309	1	0.109328	1	0.0950973	-0.419242	FALSE	0	0	FALSE	HYPER	0	FALSE	0	0	FALSE	HYPO	0
									CSRP2	1	0.168829	0.000500639	0.362892	0.0034113	0.343572	1	0.108588	0.679904	0.194062	0.764275	0.174743	1	-0.0602416	1	-0.0193192	1	-0.254304	1	-0.234985	-0.418998	FALSE	0	0	TRUE	HYPO	HYPER	FALSE	0	0	FALSE	HYPER	0
									GATA3	1	-0.0653185	0.545853	-0.114707	0.00808485	-0.28565	1	0.0616091	1	-0.0493887	0.347022	-0.220332	1	0.126928	0.81604	-0.170943	1	0.176316	0.473353	0.34726	-0.418125	TRUE	HYPO	HYPO	TRUE	0	0	FALSE	0	0	FALSE	0	0
									SLC7A5	1	0.102989	2.54868e-05	0.380695	3.0389e-05	0.415966	1	0.182619	0.137033	0.277706	0.0558783	0.312977	1	0.0796304	1	0.0352709	1	-0.198076	0.940822	-0.233346	-0.417907	FALSE	HYPER	0	TRUE	HYPO	0	FALSE	0	0	FALSE	0	0
									CORO2A	0.23713	-0.226616	0.00600803	-0.207869	0.0494256	-0.177663	1	-0.166666	1	0.0187474	1	0.0489531	1	0.05995	1	0.0302057	1	0.0412027	1	0.0109969	-0.417467	FALSE	0	0	TRUE	HYPER	0	FALSE	HYPO	0	FALSE	0	0
									COASY	0.295196	-0.163816	3.34666e-07	-0.281998	5.11874e-08	-0.331283	0.33492	-0.222422	0.512632	-0.118182	0.118741	-0.167467	1	-0.0586061	1	-0.0492847	1	0.0595759	1	0.108861	-0.416822	FALSE	HYPO	0	TRUE	HYPER	0	FALSE	0	0	FALSE	0	0
									PLTP	0.19555	0.384906	0.000503194	0.417137	3.5902e-05	0.537328	1	0.087584	1	0.0322315	1	0.152423	1	-0.297322	1	0.120191	1	-0.329553	0.457842	-0.449744	-0.416559	FALSE	HYPER	0	TRUE	HYPO	0	FALSE	0	0	FALSE	0	0
									FAM44B	1	0.0641102	0.0312765	-0.220371	5.13426e-05	-0.412763	1	-0.0831137	0.135728	-0.284482	0.00198107	-0.476873	1	-0.147224	0.563638	-0.192392	1	0.137258	0.536103	0.329649	-0.416411	FALSE	HYPO	0	FALSE	0	0	FALSE	HYPER	0	FALSE	0	0
									KIAA1754	1	-0.0550325	0.000100481	0.275499	0.000177603	0.293035	1	0.115066	0.00558207	0.330532	0.00327314	0.348067	1	0.170099	1	0.0175353	1	-0.160433	0.966196	-0.177968	-0.416063	FALSE	HYPER	0	FALSE	0	0	FALSE	HYPO	0	FALSE	0	0
									MLLT6	0.063485	-0.329328	0.089986	-0.168947	0.0251343	-0.224172	0.498222	-0.299914	0.648451	0.160381	1	0.105157	1	0.0294138	1	-0.0552242	1	-0.130967	1	-0.0757428	-0.416039	TRUE	0	0	TRUE	HYPER	0	FALSE	HYPO	0	FALSE	0	0
									LGALS8	1	-0.0949875	0.000597199	-0.2291	0.000572047	-0.2524	1	-0.0652081	0.573459	-0.134112	0.337676	-0.157412	1	0.0297795	1	-0.0232997	1	0.163892	0.820841	0.187192	-0.41577	FALSE	HYPO	0	TRUE	HYPER	0	FALSE	0	0	FALSE	0	0
									MPZL2	0.420916	0.166644	0.0197362	0.156425	0.0124655	0.182217	1	0.0996836	1	-0.0102186	1	0.0155726	1	-0.0669604	1	0.0257912	1	-0.0567417	1	-0.0825329	-0.41563	FALSE	HYPER	0	TRUE	HYPO	HYPER	FALSE	0	0	FALSE	0	0
									MARCKS	1	-0.0371341	0.0491238	0.484216	0.174519	0.425624	1	0.0519336	0.362923	0.52135	0.47662	0.462758	1	0.0890677	1	-0.0585921	1	-0.432282	1	-0.37369	-0.414241	FALSE	0	0	TRUE	0	0	FALSE	HYPO	0	TRUE	HYPER	HYPER
									IL13RA1	0.28631	-0.219057	0.0133259	-0.19273	0.0823336	-0.166086	1	-0.128159	1	0.026327	1	0.0529715	1	0.0908983	1	0.0266445	1	0.0645713	1	0.0379269	-0.413574	FALSE	0	0	TRUE	HYPER	0	FALSE	HYPO	0	TRUE	0	0
									SIAH2	0.597645	-0.242068	2.56478e-07	-0.514868	0.000269302	-0.404168	0.768042	-0.306076	0.230197	-0.2728	0.814275	-0.1621	1	-0.0640086	1	0.110699	1	0.208791	1	0.0980917	-0.413397	FALSE	0	0	TRUE	HYPER	0	FALSE	0	0	FALSE	HYPO	0
									HSPA2	1	-0.193182	0.00212547	-0.354812	1.3501e-05	-0.534827	0.466845	-0.415717	0.969206	-0.16163	0.114428	-0.341645	1	-0.222534	1	-0.180016	1	-0.060905	1	0.119111	-0.41334	FALSE	HYPO	0	TRUE	HYPER	0	FALSE	0	0	FALSE	0	0
									MLXIP	1	0.0599431	5.14178e-07	0.56327	5.16409e-07	0.616997	1	0.225044	0.00936788	0.503327	0.00311844	0.557054	1	0.165101	1	0.0537269	1	-0.338226	0.541516	-0.391953	-0.41309	FALSE	HYPER	0	FALSE	HYPO	0	FALSE	0	0	FALSE	0	0
									PPM1F	4.00467e-05	0.366943	1.98828e-09	0.342347	5.99028e-11	0.418446	0.366706	0.220898	1	-0.0245965	1	0.051503	1	-0.146045	1	0.0760995	1	-0.121449	0.536103	-0.197548	-0.4127	FALSE	HYPER	0	TRUE	HYPO	0	FALSE	0	0	FALSE	0	0
									GPR18	1	0.0341953	0.0119738	0.217689	0.103655	0.177888	1	0.0602902	0.44064	0.183493	0.72172	0.143692	1	0.026095	1	-0.039801	1	-0.157398	1	-0.117597	-0.411969	FALSE	0	0	TRUE	HYPO	HYPO	FALSE	0	0	TRUE	HYPER	0
									SLFN5	1	-0.0384894	0.0013281	0.256148	0.0034113	0.260292	0.731391	0.244129	0.0421767	0.294637	0.0283745	0.298781	1	0.282619	1	0.00414366	1	-0.0120186	1	-0.0161622	-0.411812	FALSE	0	0	FALSE	0	0	FALSE	HYPO	0	FALSE	HYPER	0
									SLC7A8	1	-0.075561	5.89844e-06	-0.290398	0.00931547	-0.194874	0.670679	-0.210028	0.0903957	-0.214837	0.662383	-0.119313	1	-0.134467	1	0.095524	1	0.0803692	1	-0.0151548	-0.411651	FALSE	0	0	TRUE	HYPER	0	FALSE	0	0	FALSE	HYPO	0
									NPM3	1	0.211926	0.000678441	0.430015	0.188688	0.240388	1	0.273703	0.77564	0.21809	1	0.0284626	1	0.0617771	1	-0.189627	1	-0.156313	1	0.0333145	-0.411514	FALSE	0	0	TRUE	HYPO	0	FALSE	0	0	TRUE	HYPER	HYPER
									PTX3	0.224627	0.423837	0.00141416	0.437394	0.00740189	0.414872	1	0.103193	1	0.0135568	1	-0.00896527	1	-0.320644	1	-0.0225221	1	-0.3342	1	-0.311678	-0.411468	FALSE	0	0	TRUE	HYPO	0	FALSE	0	0	FALSE	HYPER	0
									CDK6	1	0.22817	2.17108e-05	0.525916	4.09931e-08	0.75019	0.84812	0.355763	0.367997	0.297746	0.0141039	0.52202	1	0.127593	0.855306	0.224275	1	-0.170153	0.659482	-0.394428	-0.410917	FALSE	HYPER	0	FALSE	HYPO	0	FALSE	0	0	FALSE	0	0
									PLCD3	1	-0.0928495	0.00012707	-0.239845	0.0421994	-0.157271	0.972148	-0.162121	0.390163	-0.146995	1	-0.0644218	1	-0.0692713	1	0.0825733	1	0.0777238	1	-0.00484948	-0.410862	FALSE	0	0	TRUE	HYPER	HYPER	FALSE	0	0	FALSE	HYPO	0
									LRRN1	0.0246756	0.378067	0.000136042	0.328101	0.000220952	0.350583	1	0.0696578	1	-0.0499661	1	-0.0274834	1	-0.308409	1	0.0224826	1	-0.258443	0.611316	-0.280925	-0.409572	FALSE	0	0	TRUE	HYPO	0	FALSE	HYPER	0	FALSE	0	0
									MCM5	0.87541	0.123318	1.12508e-05	0.266605	0.0671736	0.143295	0.253068	0.263759	0.393173	0.143287	1	0.019977	1	0.140441	0.615414	-0.12331	1	-0.00284623	1	0.120464	-0.409286	FALSE	0	0	TRUE	HYPO	HYPO	FALSE	0	0	TRUE	HYPER	HYPO
									NECAB3	0.289042	-0.276817	1.92332e-09	-0.566837	1.62584e-08	-0.57771	0.749707	-0.286436	0.122564	-0.29002	0.0803555	-0.300893	1	-0.00961854	1	-0.0108727	1	0.280401	0.677394	0.291274	-0.409162	FALSE	HYPO	0	TRUE	HYPER	HYPER	FALSE	0	0	FALSE	0	0
									SIX2	0.985029	-0.215953	0.10028	0.229628	0.0173324	0.325197	1	0.107757	0.0354983	0.445581	0.00507179	0.54115	1	0.32371	1	0.0955692	1	-0.121871	1	-0.217441	-0.408871	FALSE	HYPER	0	FALSE	0	0	FALSE	HYPO	0	FALSE	0	0
									KIF13B	0.932349	-0.187592	0.000209572	-0.360194	0.0189656	-0.269585	0.0648925	-0.531977	0.747117	-0.172602	1	-0.0819923	1	-0.344385	1	0.0906099	1	-0.171782	0.874727	-0.262392	-0.408749	FALSE	0	0	TRUE	HYPER	HYPER	FALSE	0	0	FALSE	0	0
									TLE3	1	-0.11232	0.000289287	-0.231196	0.000350675	-0.250839	0.808084	-0.186524	0.684524	-0.118876	0.441635	-0.138519	1	-0.0742041	1	-0.019643	1	0.0446719	1	0.0643149	-0.408207	FALSE	HYPO	0	TRUE	HYPER	0	FALSE	0	0	FALSE	0	0
									DEGS1	1	0.0338773	0.00430521	0.430685	0.458901	0.212492	1	0.0902311	0.225955	0.396808	1	0.178615	1	0.0563538	1	-0.218193	1	-0.340454	1	-0.122261	-0.408129	FALSE	0	0	TRUE	HYPO	HYPO	FALSE	0	0	TRUE	HYPER	0
									ZNF553	1	0.060585	0.00321276	-0.258471	0.0015561	-0.301758	1	-0.193431	0.0422683	-0.319057	0.0117927	-0.362343	1	-0.254016	1	-0.0432865	1	0.0650401	1	0.108327	-0.407833	FALSE	HYPO	0	FALSE	0	0	FALSE	HYPER	0	FALSE	0	0
									GALM	0.851381	-0.286702	0.0919537	0.281635	1	0.0457363	1	-0.0182513	0.0225305	0.568337	0.338973	0.332438	1	0.268451	0.97315	-0.235899	1	-0.299887	1	-0.0639876	-0.407809	FALSE	0	0	FALSE	0	0	TRUE	HYPO	HYPO	TRUE	HYPER	0
									B4GALT1	1	-0.0437522	1	0.0307471	0.0344337	0.202682	1	-0.0938339	1	0.0744994	0.0954848	0.246434	1	-0.0500817	0.454581	0.171934	1	-0.124581	0.461033	-0.296515	-0.40755	TRUE	HYPER	HYPER	TRUE	0	0	FALSE	0	0	FALSE	0	0
									KIAA0100	0.210682	-0.168956	4.74759e-06	-0.239722	3.06157e-07	-0.294959	0.279523	-0.220988	1	-0.0707665	0.337032	-0.126003	1	-0.0520323	1	-0.0552361	1	0.0187342	1	0.0739703	-0.406688	FALSE	HYPO	0	TRUE	HYPER	HYPER	FALSE	0	0	FALSE	0	0
									CMTM4	1	-0.069142	0.227237	-0.131151	0.00180089	-0.275332	1	-0.172086	1	-0.0620085	0.231095	-0.20619	1	-0.102944	0.809589	-0.144182	1	-0.0409358	1	0.103246	-0.406618	TRUE	HYPO	HYPO	TRUE	HYPER	0	FALSE	0	0	FALSE	0	0
									SULT1A1	0.74841	-0.121133	1.18477e-06	-0.265849	0.00940105	-0.166365	0.276891	-0.231993	0.265517	-0.144715	1	-0.045232	1	-0.110859	0.850393	0.0994831	1	0.0338557	1	-0.0656274	-0.405936	FALSE	0	0	TRUE	HYPER	0	FALSE	0	0	FALSE	HYPO	0
									ZNF655	1	0.0736782	0.116965	-0.16395	0.133465	-0.175999	0.906646	-0.230102	0.203987	-0.237628	0.137223	-0.249677	1	-0.30378	1	-0.0120494	1	-0.0661525	1	-0.0541031	-0.405311	FALSE	0	0	FALSE	0	0	FALSE	HYPER	0	FALSE	0	0
									HJURP	0.247412	0.200375	8.34313e-06	0.285939	0.00782647	0.198781	0.739096	0.200288	1	0.0855646	1	-0.00159376	1	-8.7019e-05	1	-0.0871584	1	-0.0856516	1	0.00150674	-0.405248	FALSE	0	0	TRUE	HYPO	HYPO	FALSE	0	0	FALSE	HYPER	0
									VASH2	0.0885304	0.369071	2.43093e-05	0.409106	1.5581e-05	0.4609	1	0.188593	1	0.0400352	1	0.0918289	1	-0.180478	1	0.0517937	1	-0.220513	0.829766	-0.272307	-0.40465	FALSE	HYPER	0	TRUE	HYPO	HYPER	FALSE	0	0	FALSE	0	0
									BMP2	0.0504127	0.585254	7.54232e-06	0.641484	2.94592e-06	0.734702	0.76838	0.439587	1	0.0562305	1	0.149448	1	-0.145667	1	0.0932179	1	-0.201898	1	-0.295116	-0.404294	FALSE	HYPER	0	TRUE	HYPO	0	FALSE	0	0	FALSE	0	0
									EDG1	0.713284	0.345087	0.00114484	0.509788	2.87414e-06	0.784862	1	0.0959647	1	0.164701	0.157883	0.439775	1	-0.249122	0.866482	0.275074	1	-0.413823	0.352282	-0.688897	-0.404025	FALSE	HYPER	0	TRUE	HYPO	HYPER	FALSE	0	0	FALSE	0	0
			X						WNK4	1	-0.0794609	1.07382e-05	-0.480773	2.93431e-05	-0.504111	0.903663	-0.299063	0.0509725	-0.401312	0.0264666	-0.424651	1	-0.219602	1	-0.0233388	1	0.181709	1	0.205048	-0.404024	FALSE	HYPO	0	FALSE	HYPER	0	FALSE	0	0	FALSE	0	0
									CDC2L6	0.685645	0.164959	9.68982e-08	0.38429	0.000331895	0.286459	0.306065	0.295727	0.139653	0.219331	0.769729	0.1215	1	0.130768	1	-0.0978309	1	-0.0885629	1	0.00926806	-0.40373	FALSE	0	0	TRUE	HYPO	HYPO	FALSE	0	0	FALSE	HYPER	0
									MORC2	0.440469	0.226187	0.166458	0.154255	0.998986	-0.0389418	1	0.0896317	1	-0.0719326	0.103895	-0.265129	1	-0.136556	0.404195	-0.193197	1	-0.0646232	1	0.128573	-0.402902	FALSE	HYPO	0	FALSE	0	0	FALSE	HYPER	0	FALSE	0	0
									NXNL2	1	0.0277311	0.0715441	-0.226543	0.344024	-0.175374	1	0.0585057	0.381786	-0.254274	0.636261	-0.203105	1	0.0307746	1	0.0511695	1	0.285049	1	0.233879	-0.401891	FALSE	0	0	FALSE	0	0	FALSE	0	0	FALSE	HYPO	0
									ZFAND6	1	-0.0988888	0.0905686	-0.190443	0.00128507	-0.339531	1	0.0160536	1	-0.0915547	0.261223	-0.240642	1	0.114942	1	-0.149088	1	0.206497	0.461033	0.355585	-0.401064	TRUE	HYPO	HYPO	TRUE	0	0	FALSE	0	0	FALSE	0	0
									NR2F6	1	0.00351675	0.0160779	-0.184429	0.00244792	-0.245555	0.773377	-0.218231	0.266178	-0.187946	0.0524696	-0.249072	1	-0.221748	1	-0.0611264	1	-0.0338022	1	0.0273242	-0.401035	FALSE	HYPO	0	TRUE	HYPER	0	FALSE	0	0	FALSE	0	0
									CENPN	1	0.159711	1.81116e-08	0.695751	3.33251e-05	0.559461	0.286942	0.512754	0.0121953	0.536041	0.0783616	0.39975	1	0.353043	1	-0.13629	1	-0.182997	1	-0.0467072	-0.400463	FALSE	0	0	FALSE	HYPO	0	FALSE	0	0	FALSE	HYPER	0
									OTUD7B	0.863238	-0.166693	1.67388e-05	-0.350136	4.90578e-06	-0.408004	1	-0.1503	0.442717	-0.183443	0.13626	-0.241311	1	0.0163929	1	-0.0578686	1	0.199836	0.671524	0.257704	-0.400322	FALSE	HYPO	0	TRUE	HYPER	0	FALSE	0	0	FALSE	0	0
x									PODXL	0.125617	0.340401	4.31251e-05	0.393057	4.81258e-05	0.430179	1	0.210017	1	0.0526561	1	0.0897784	1	-0.130384	1	0.0371223	1	-0.18304	1	-0.220162	-0.400166	FALSE	HYPER	0	TRUE	HYPO	0	FALSE	0	0	FALSE	0	0
									CHST11	0.035149	0.647663	8.39544e-11	1.02584	2.29311e-11	1.22431	0.186305	0.720525	0.332792	0.378179	0.0319225	0.576644	1	0.0728614	1	0.198466	1	-0.305317	0.611226	-0.503783	-0.399981	FALSE	HYPER	0	FALSE	HYPO	0	FALSE	0	0	FALSE	0	0
									MAP3K1	1	-0.120266	0.0149164	-0.258142	1	-0.0180148	1	-0.0353203	0.997702	-0.137876	1	0.102251	1	0.0849457	0.286392	0.240127	1	0.222822	1	-0.0173055	-0.399765	FALSE	0	0	TRUE	HYPER	HYPER	FALSE	0	0	TRUE	HYPO	0
									JDP2	0.770886	-0.151185	0.092546	-0.140857	1	0.0102494	1	-0.169222	1	0.0103272	0.373046	0.161434	1	-0.0180376	0.481487	0.151107	1	-0.0283649	0.940822	-0.179472	-0.399611	FALSE	HYPER	0	FALSE	0	0	FALSE	0	0	FALSE	0	0
									MKL2	1	-0.0698628	2.40881e-06	-0.442863	7.62028e-07	-0.510294	0.832248	-0.273471	0.0298514	-0.373	0.00541371	-0.440431	1	-0.203609	1	-0.0674309	1	0.169391	0.966338	0.236822	-0.399055	FALSE	HYPO	0	FALSE	HYPER	0	FALSE	0	0	FALSE	0	0
x									KIT	1	0.0249111	0.00167936	0.284697	3.25048e-05	0.402777	1	0.201272	0.166595	0.259786	0.0117927	0.377866	1	0.176361	1	0.11808	1	-0.083425	1	-0.201505	-0.398409	FALSE	HYPER	0	FALSE	HYPO	0	FALSE	0	0	FALSE	0	0
									TPBG	1	-0.0721056	0.0125895	-0.24515	0.00765667	-0.285608	1	-0.10393	0.688428	-0.173045	0.376783	-0.213502	1	-0.0318246	1	-0.0404578	1	0.14122	1	0.181678	-0.397983	FALSE	HYPO	0	TRUE	HYPER	0	FALSE	0	0	FALSE	0	0
									NUMA1	1	-0.327389	0.00150681	-0.589947	0.000853931	-0.676898	1	-0.258315	0.967836	-0.262558	0.615117	-0.349509	1	0.0690733	1	-0.086951	1	0.331632	1	0.418583	-0.397829	FALSE	HYPO	0	TRUE	HYPER	0	FALSE	0	0	FALSE	0	0
									SEMA4D	1	0.0195486	0.00825308	0.236233	0.0091271	0.257455	1	0.145338	0.296556	0.216684	0.17489	0.237907	1	0.125789	1	0.0212228	1	-0.0908948	1	-0.112118	-0.397242	FALSE	HYPER	0	TRUE	HYPO	0	FALSE	0	0	FALSE	0	0
									SRD5A1	0.691944	0.16952	0.0286206	0.178826	0.00670887	0.233029	1	0.159837	1	0.00930644	1	0.0635091	1	-0.0096834	1	0.0542027	1	-0.0189898	1	-0.0731925	-0.396771	FALSE	HYPER	0	TRUE	HYPO	HYPO	FALSE	0	0	FALSE	0	0
									TUBG2	1	-0.0210082	0.0108663	-0.352258	3.63695e-05	-0.591566	1	-0.135396	0.302759	-0.33125	0.00995405	-0.570557	1	-0.114387	0.823796	-0.239307	1	0.216863	0.541074	0.45617	-0.396269	FALSE	HYPO	0	FALSE	HYPER	0	FALSE	0	0	FALSE	0	0
									CLMN	1	-0.071344	0.280943	-0.110742	0.100952	0.153033	1	-0.160851	1	-0.0393981	0.0846957	0.224377	1	-0.0895073	0.0161921	0.263776	1	-0.0501092	0.352282	-0.313885	-0.396127	TRUE	HYPER	HYPER	FALSE	0	0	FALSE	0	0	TRUE	0	0
									TCEA3	0.195606	-0.263046	1.28942e-06	-0.389787	0.000937167	-0.299973	0.419734	-0.30749	0.901961	-0.126741	1	-0.0369276	1	-0.044444	1	0.0898138	1	0.0822974	1	-0.00751635	-0.395918	FALSE	0	0	TRUE	HYPER	HYPER	FALSE	0	0	FALSE	HYPO	0
									ENPP2	1	0.104758	0.203767	0.165216	0.00264361	0.327039	1	0.141653	1	0.0604579	0.373046	0.222281	1	0.0368949	0.981094	0.161823	1	-0.023563	1	-0.185386	-0.395637	TRUE	HYPER	HYPER	TRUE	HYPO	HYPER	FALSE	0	0	FALSE	0	0
									CYB5A	0.131718	-0.337006	6.11856e-07	-0.478932	0.00516052	-0.309184	0.668882	-0.315028	0.950841	-0.141926	1	0.0278223	1	0.0219781	0.893747	0.169748	1	0.163904	1	-0.00584417	-0.394912	FALSE	0	0	TRUE	HYPER	0	FALSE	0	0	FALSE	HYPO	0
									KIAA1946	0.871115	0.145773	0.00641279	0.205729	0.00106188	0.264239	1	0.0583727	1	0.0599558	0.795666	0.118465	1	-0.0874005	1	0.0585097	1	-0.147356	0.808547	-0.205866	-0.394372	FALSE	HYPER	0	TRUE	HYPO	HYPER	FALSE	0	0	FALSE	0	0
									PPP1R14C	0.281632	0.286672	0.00767976	0.267535	0.0111837	0.282875	0.736404	0.296798	1	-0.019137	1	-0.00379721	1	0.0101257	1	0.0153397	1	0.0292627	1	0.0139229	-0.394276	FALSE	0	0	TRUE	HYPO	HYPO	FALSE	0	0	FALSE	0	0
									BAMBI	1	0.149273	0.00434798	0.291902	9.80845e-05	0.42178	0.773965	0.297226	0.965869	0.14263	0.182892	0.272507	1	0.147954	1	0.129877	1	0.00532404	1	-0.124553	-0.39389	FALSE	HYPER	0	TRUE	HYPO	HYPO	FALSE	0	0	FALSE	0	0
									FBXW4	1	-0.0698107	0.00254279	-0.14821	0.000829313	-0.177846	0.689567	-0.152955	0.841926	-0.0783989	0.397092	-0.108036	1	-0.083144	1	-0.0296368	1	-0.00474513	1	0.0248917	-0.393831	FALSE	HYPO	0	TRUE	HYPER	HYPER	FALSE	0	0	FALSE	0	0
									C4orf32	1	0.0191829	0.00315355	-0.204602	0.587451	-0.0864609	0.882829	-0.185122	0.0899291	-0.223785	0.838912	-0.105644	1	-0.204305	0.889369	0.118141	1	0.0194794	1	-0.0986614	-0.393607	FALSE	0	0	TRUE	0	0	FALSE	HYPER	0	TRUE	HYPO	HYPER
									LETM1	1	-0.141393	0.102664	-0.158513	0.00874242	-0.24347	1	-0.128631	1	-0.0171192	1	-0.102077	1	0.0127624	1	-0.0849574	1	0.0298816	1	0.114839	-0.393056	TRUE	HYPO	HYPO	TRUE	HYPER	0	FALSE	0	0	FALSE	0	0
									TLE4	0.104292	0.478788	0.000109734	0.507474	0.000352452	0.518995	0.896252	0.359443	1	0.0286861	1	0.0402067	1	-0.119345	1	0.0115206	1	-0.148031	1	-0.159552	-0.392824	FALSE	HYPER	0	TRUE	HYPO	HYPER	FALSE	0	0	FALSE	0	0
									OGFRL1	0.134241	0.19944	0.897076	0.0435667	0.0635646	0.135478	1	-0.0346881	0.230197	-0.155873	1	-0.0639614	1	-0.234128	1	0.0919116	1	-0.0782548	0.75622	-0.170166	-0.392779	FALSE	0	0	FALSE	0	0	FALSE	HYPER	0	FALSE	0	0
									ATP2C2	1	-0.0871584	0.167953	0.129587	0.771189	-0.074781	0.773965	0.218264	0.147512	0.216746	1	0.0123774	1	0.305423	0.133241	-0.204368	1	0.0886768	0.397407	0.293045	-0.392564	FALSE	0	0	FALSE	0	0	FALSE	HYPO	0	FALSE	0	0
									DICER1	1	-0.0830863	0.000162508	-0.27558	0.0110738	-0.216053	1	-0.168586	0.258519	-0.192494	0.676869	-0.132967	1	-0.0854996	1	0.0595264	1	0.106994	1	0.0474676	-0.392098	FALSE	0	0	TRUE	HYPER	HYPER	FALSE	0	0	FALSE	HYPO	0
									TRIM3	1	-0.046387	0.00115686	-0.243353	0.0715743	-0.170372	0.718513	-0.231837	0.244088	-0.196966	0.7687	-0.123985	1	-0.18545	1	0.0729811	1	0.0115157	1	-0.0614654	-0.391645	FALSE	0	0	TRUE	HYPER	0	FALSE	0	0	TRUE	HYPO	HYPO
									WDR32	1	-0.0449434	0.011392	-0.270747	0.000309523	-0.403414	1	-0.10164	0.446754	-0.225803	0.0462471	-0.358471	1	-0.0566966	1	-0.132667	1	0.169107	0.746991	0.301774	-0.39153	FALSE	HYPO	0	FALSE	HYPER	0	FALSE	0	0	FALSE	0	0
									B2M	1	0.154351	0.00954241	0.293328	0.00477734	0.346598	1	0.231625	1	0.138977	0.699735	0.192247	1	0.0772736	1	0.0532695	1	-0.0617035	1	-0.114973	-0.39133	FALSE	HYPER	0	TRUE	HYPO	0	FALSE	0	0	FALSE	0	0
									CORO1A	1	-0.148707	0.0667856	0.213006	0.0119613	0.293748	1	0.218641	0.055735	0.361714	0.00880128	0.442456	1	0.367349	1	0.080742	1	0.005635	1	-0.075107	-0.391229	TRUE	HYPER	0	FALSE	0	0	FALSE	HYPO	0	FALSE	0	0
									STK17A	1	-0.059057	6.5161e-05	0.348114	0.00103327	0.320983	1	0.130558	0.00558207	0.407171	0.0104115	0.38004	1	0.189615	1	-0.0271305	1	-0.217556	1	-0.190425	-0.390452	FALSE	0	0	FALSE	0	0	FALSE	HYPO	0	FALSE	HYPER	0
									SLC35C1	1	0.0401106	0.006503	0.249158	0.0755379	0.201027	1	0.00106691	0.367433	0.209047	0.667681	0.160916	1	-0.0390437	1	-0.0481306	1	-0.248091	1	-0.19996	-0.389752	FALSE	0	0	TRUE	HYPO	0	FALSE	0	0	TRUE	HYPER	0
									VANGL2	0.614409	0.250099	0.00692419	0.296465	0.00543309	0.334279	1	0.149104	1	0.0463655	1	0.0841791	1	-0.100996	1	0.0378136	1	-0.147361	1	-0.185175	-0.388902	FALSE	HYPER	0	TRUE	HYPO	HYPER	FALSE	0	0	FALSE	0	0
									AHNAK	0.168068	-0.342709	1.47109e-06	-0.490144	1.60367e-06	-0.536408	0.235348	-0.447371	0.969401	-0.147435	0.636261	-0.193699	1	-0.104662	1	-0.0462639	1	0.0427728	1	0.0890366	-0.388801	FALSE	HYPO	0	TRUE	HYPER	HYPER	FALSE	0	0	FALSE	0	0
									SLFN13	1	0.0155929	0.568417	0.215961	0.00956098	0.540194	1	-0.0280632	1	0.200368	0.141591	0.524601	1	-0.0436562	0.848533	0.324233	1	-0.244024	0.657396	-0.568257	-0.387709	TRUE	HYPER	HYPER	TRUE	0	0	FALSE	0	0	FALSE	0	0
									SULF2	1	-0.139189	0.638376	-0.114926	0.00648917	-0.321515	1	-0.220428	1	0.0242635	0.709628	-0.182326	1	-0.0812386	0.616459	-0.206589	1	-0.105502	1	0.101087	-0.387364	TRUE	HYPO	HYPO	TRUE	HYPER	0	FALSE	0	0	FALSE	0	0
									MARCH10	1	-0.200498	0.0452177	-0.261471	3.07628e-06	-0.58926	0.947568	-0.304921	1	-0.0609729	0.0650645	-0.388762	1	-0.104423	0.133241	-0.327789	1	-0.0434498	0.999824	0.284339	-0.387324	FALSE	HYPO	0	TRUE	HYPER	0	FALSE	0	0	FALSE	0	0
									ANG	1	-0.159105	0.00301205	-0.344215	0.276506	-0.196127	1	-0.0394218	0.84042	-0.185111	1	-0.0370225	1	0.119683	1	0.148088	1	0.304794	1	0.156706	-0.386917	FALSE	0	0	TRUE	HYPER	0	FALSE	0	0	TRUE	HYPO	HYPO
									C5orf33	0.539954	-0.204796	0.0122707	-0.217676	0.0096637	-0.246583	1	-0.163232	1	-0.0128798	1	-0.0417871	1	0.0415642	1	-0.0289073	1	0.054444	1	0.0833513	-0.386872	FALSE	HYPO	0	TRUE	HYPER	HYPER	FALSE	0	0	FALSE	0	0
									ZNRF1	0.571914	0.244731	0.00114531	0.331016	0.609677	0.125868	0.900495	0.272639	1	0.0862841	1	-0.118864	1	0.0279077	0.576926	-0.205148	1	-0.0583763	1	0.146771	-0.386793	FALSE	0	0	TRUE	HYPO	0	FALSE	0	0	TRUE	HYPER	HYPER
									LAPTM5	0.850923	-0.149602	0.226608	0.121821	0.0308677	0.190553	1	0.0852082	0.0439659	0.271423	0.00512608	0.340155	1	0.23481	1	0.0687319	1	-0.0366128	1	-0.105345	-0.386721	FALSE	HYPER	0	FALSE	0	0	FALSE	HYPO	0	FALSE	0	0
									ARHGAP8	1	-0.104257	0.190006	-0.221593	0.00484439	-0.40901	1	-0.256485	1	-0.117336	0.330082	-0.304753	1	-0.152228	1	-0.187417	1	-0.0348917	1	0.152525	-0.386386	TRUE	HYPO	HYPO	TRUE	HYPER	0	FALSE	0	0	FALSE	0	0
x									DAPK1	1	-0.0250382	0.00166427	0.250613	0.0116725	0.229154	0.773965	0.233294	0.0628978	0.275651	0.0766494	0.254192	1	0.258332	1	-0.0214595	1	-0.0173191	1	0.00414036	-0.386023	FALSE	0	0	TRUE	0	0	FALSE	HYPO	0	FALSE	HYPER	0
									TNFRSF1A	1	-0.13632	0.917102	-0.0554301	0.21862	0.142902	1	-0.132891	1	0.0808895	0.0393559	0.279222	1	0.00342813	0.213005	0.198332	1	-0.0774614	0.525901	-0.275794	-0.385778	TRUE	HYPER	0	FALSE	0	0	TRUE	HYPO	0	FALSE	0	0
x									LOX	1	-0.0564147	0.0298008	0.228121	0.000177411	0.395337	1	0.0600259	0.15604	0.284536	0.00469718	0.451752	1	0.116441	0.902356	0.167216	1	-0.168095	0.536103	-0.335311	-0.385771	FALSE	HYPER	0	FALSE	0	0	FALSE	HYPO	0	FALSE	0	0
									BOC	0.685645	0.278128	0.00791951	0.339686	0.0490615	0.299308	1	0.254111	1	0.0615579	1	0.0211793	1	-0.0240169	1	-0.0403785	1	-0.0855748	1	-0.0451963	-0.384516	FALSE	0	0	TRUE	HYPO	HYPER	FALSE	0	0	FALSE	HYPER	0
									ZNF3	1	0.0405701	0.0702256	-0.231453	0.000521183	-0.421983	0.795192	-0.324299	0.324914	-0.272023	0.0129922	-0.462553	1	-0.364869	0.910917	-0.19053	1	-0.0928459	1	0.0976841	-0.383915	TRUE	HYPO	0	FALSE	0	0	FALSE	HYPER	0	FALSE	0	0
									SLC19A2	1	-0.107657	0.00721931	-0.275069	0.00218997	-0.337751	1	0.0102544	0.796346	-0.167412	0.350566	-0.230095	1	0.117911	1	-0.0626825	1	0.285323	0.532123	0.348006	-0.383862	FALSE	HYPO	0	TRUE	0	0	FALSE	0	0	FALSE	0	0
									GPR98	0.988926	-0.169729	4.03622e-07	-0.459872	0.000131477	-0.383605	1	-0.16629	0.112893	-0.290143	0.356363	-0.213876	1	0.00343863	1	0.0762664	1	0.293582	1	0.217315	-0.382323	FALSE	0	0	TRUE	HYPER	0	FALSE	0	0	FALSE	HYPO	0
									PTGES	0.710616	-0.237903	2.89411e-05	-0.439995	0.000119531	-0.447616	0.818115	-0.30749	0.658528	-0.202092	0.574224	-0.209713	1	-0.069587	1	-0.00762136	1	0.132505	1	0.140126	-0.382211	FALSE	HYPO	0	TRUE	HYPER	HYPER	FALSE	0	0	FALSE	0	0
									MOBKL2B	0.288811	0.206902	2.947e-05	0.288235	2.29163e-08	0.425652	1	0.131674	1	0.0813326	0.0941508	0.21875	1	-0.0752283	0.655993	0.137417	1	-0.156561	0.386284	-0.293978	-0.382156	FALSE	HYPER	0	TRUE	HYPO	HYPER	FALSE	0	0	FALSE	0	0
									PARP4	1	-0.138509	0.138961	0.21555	0.124834	0.24241	1	0.225198	0.133952	0.354059	0.0715666	0.380919	1	0.363707	1	0.0268596	1	0.00964806	1	-0.0172116	-0.382143	FALSE	HYPER	0	FALSE	0	0	FALSE	HYPO	0	FALSE	0	0
									PCCA	0.0246756	-0.217043	5.3775e-10	-0.31312	2.89509e-07	-0.276527	0.307532	-0.201332	0.632545	-0.0960771	1	-0.0594844	1	0.015711	1	0.0365927	1	0.111788	1	0.0751954	-0.381764	FALSE	0	0	TRUE	HYPER	HYPER	FALSE	0	0	FALSE	HYPO	0
									TMEM45A	1	0.0348535	0.00569922	0.182177	0.0595942	0.150503	1	0.106596	0.395162	0.147324	0.672501	0.11565	1	0.0717427	1	-0.0316738	1	-0.0755809	1	-0.0439071	-0.381518	FALSE	0	0	TRUE	HYPO	HYPO	FALSE	0	0	TRUE	HYPER	0
									AMFR	1	-0.0557687	0.00361204	-0.264059	0.022181	-0.239353	1	-0.209118	0.373234	-0.20829	0.497966	-0.183584	1	-0.153349	1	0.0247057	1	0.0549404	1	0.0302347	-0.380976	FALSE	0	0	TRUE	HYPER	HYPER	FALSE	0	0	FALSE	HYPO	0
									H3F3B	0.908878	-0.186046	0.0125377	-0.250335	0.0110517	-0.280101	1	-0.159913	1	-0.0642895	1	-0.0940554	1	0.0261328	1	-0.0297659	1	0.0904222	1	0.120188	-0.380969	FALSE	HYPO	0	TRUE	HYPER	HYPER	FALSE	0	0	FALSE	0	0
									ZBTB24	1	0.111173	0.0054821	0.267484	0.00078319	0.34581	1	0.105566	0.809969	0.156311	0.266918	0.234637	1	-0.00560646	1	0.0783263	1	-0.161918	0.934536	-0.240244	-0.380933	FALSE	HYPER	0	TRUE	HYPO	HYPO	FALSE	0	0	FALSE	0	0
									ACVR1B	1	-0.110591	0.0124287	-0.23951	0.00542685	-0.288238	1	-0.159365	0.974797	-0.128919	0.583696	-0.177646	1	-0.0487734	1	-0.0487273	1	0.0801456	1	0.128873	-0.380742	FALSE	HYPO	0	TRUE	HYPER	HYPER	FALSE	0	0	FALSE	0	0
									ZNF532	0.35972	0.228458	0.000126584	0.312023	0.00224902	0.280906	0.979656	0.210022	1	0.0835646	1	0.0524477	1	-0.0184359	1	-0.031117	1	-0.102001	1	-0.0708836	-0.380679	FALSE	0	0	TRUE	HYPO	HYPER	FALSE	0	0	FALSE	HYPER	0
									MATR3	1	0.0528225	2.75543e-09	0.313134	5.08107e-09	0.335688	0.170021	0.247456	0.00242484	0.260311	0.000933365	0.282865	1	0.194634	1	0.0225543	1	-0.0656775	1	-0.0882319	-0.38045	FALSE	HYPER	0	FALSE	HYPO	0	FALSE	0	0	FALSE	0	0
									FNBP1	1	-0.0189032	0.0780476	0.267484	0.016385	0.365251	1	-0.088424	0.453528	0.286388	0.127532	0.384154	1	-0.0695208	1	0.0977667	1	-0.355908	0.536103	-0.453675	-0.379406	TRUE	HYPER	HYPER	TRUE	0	0	FALSE	0	0	FALSE	0	0
									C6orf206	0.0195392	-0.410014	5.55675e-07	-0.455752	6.84408e-05	-0.39926	0.581555	-0.314021	1	-0.0457374	1	0.0107547	1	0.095993	1	0.0564921	1	0.14173	1	0.0852383	-0.378865	FALSE	0	0	TRUE	HYPER	HYPER	FALSE	0	0	FALSE	HYPO	0
									LRIG1	0.978429	-0.131021	0.000940657	-0.234759	0.197553	-0.133001	1	-0.152637	0.94316	-0.103738	1	-0.00198055	1	-0.0216166	1	0.101758	1	0.0821216	1	-0.0196361	-0.378839	FALSE	0	0	TRUE	HYPER	HYPER	FALSE	0	0	TRUE	HYPO	HYPO
									KIF13A	1	-0.099366	9.48414e-05	-0.31962	3.36014e-05	-0.372809	0.786408	-0.243901	0.24241	-0.220254	0.0674799	-0.273443	1	-0.144535	1	-0.053189	1	0.0757193	1	0.128908	-0.378365	FALSE	HYPO	0	TRUE	HYPER	HYPER	FALSE	0	0	FALSE	0	0
									C6orf115	1	0.0069161	0.00717826	0.181195	0.0107568	0.19106	1	0.104202	0.233051	0.174279	0.1564	0.184144	1	0.0972863	1	0.0098654	1	-0.0769925	1	-0.0868579	-0.378361	FALSE	HYPER	0	TRUE	HYPO	HYPO	FALSE	0	0	FALSE	0	0
									TM4SF18	0.125094	0.325496	0.480711	0.120672	0.0507893	0.225396	1	0.217159	0.453715	-0.204824	1	-0.1001	1	-0.108337	1	0.104724	1	0.0964864	1	-0.00823776	-0.377521	FALSE	0	0	FALSE	HYPO	0	FALSE	HYPER	0	FALSE	0	0
									CYP1B1	0.0846944	0.398907	0.00019801	0.390086	1.15976e-05	0.500554	1	0.132466	1	-0.00882073	1	0.101647	1	-0.26644	1	0.110468	1	-0.25762	0.536103	-0.368088	-0.37692	FALSE	HYPER	0	TRUE	HYPO	0	FALSE	0	0	FALSE	0	0
									RICS	0.591081	-0.150475	0.000638651	-0.214762	0.0372593	-0.158736	1	-0.0375797	1	-0.0642877	1	-0.00826098	1	0.112895	1	0.0560267	1	0.177183	1	0.121156	-0.376576	FALSE	0	0	TRUE	HYPER	HYPER	FALSE	0	0	FALSE	HYPO	0
									ST3GAL1	0.322053	-0.190243	1	-0.0224639	0.0182289	-0.184001	0.922984	-0.175574	0.294352	0.167779	1	0.00624232	1	0.0146691	0.273138	-0.161537	1	-0.15311	1	0.00842679	-0.376561	TRUE	0	0	TRUE	HYPER	0	FALSE	HYPO	0	FALSE	0	0
									MTA3	0.683662	-0.21356	0.00208164	-0.294761	0.000267681	-0.375548	1	-0.148937	1	-0.0812006	0.735179	-0.161987	1	0.0646231	1	-0.0807869	1	0.145824	1	0.226611	-0.376317	FALSE	HYPO	0	TRUE	HYPER	0	FALSE	0	0	FALSE	0	0
									FXYD5	0.143633	0.347614	6.81747e-09	0.590363	3.8309e-11	0.763456	0.158212	0.486945	0.361636	0.242749	0.0157145	0.415841	1	0.139331	0.941274	0.173092	1	-0.103418	0.855068	-0.276511	-0.376206	FALSE	HYPER	0	FALSE	HYPO	0	FALSE	0	0	FALSE	0	0
									FOXP1	1	-0.107199	0.000984915	-0.225795	0.000459117	-0.261834	1	-0.128226	0.764384	-0.118596	0.381874	-0.154635	1	-0.0210274	1	-0.0360386	1	0.0975688	1	0.133607	-0.376198	FALSE	HYPO	0	TRUE	HYPER	HYPER	FALSE	0	0	FALSE	0	0
									POGZ	1	0.10608	0.0420134	-0.211311	0.0981064	-0.203858	1	-0.193652	0.077333	-0.317391	0.066567	-0.309938	1	-0.299732	1	0.00745296	1	0.0176588	1	0.0102058	-0.375691	FALSE	0	0	TRUE	0	0	FALSE	HYPER	0	TRUE	HYPO	0
									FABP5	0.367716	0.23415	7.31262e-05	0.33261	0.00523999	0.269088	0.589932	0.287989	1	0.09846	1	0.0349385	1	0.0538391	1	-0.0635215	1	-0.044621	1	0.0189005	-0.375611	FALSE	0	0	TRUE	HYPO	HYPO	FALSE	0	0	FALSE	HYPER	0
									HLA-F	1	0.0277964	0.00990203	0.275693	0.00655395	0.317301	1	0.154828	0.34173	0.247897	0.158382	0.289505	1	0.127032	1	0.0416078	1	-0.120865	1	-0.162473	-0.375483	FALSE	HYPER	0	TRUE	HYPO	HYPO	FALSE	0	0	FALSE	0	0
									CHST3	0.429131	0.255694	0.019064	0.242111	7.90275e-06	0.468393	0.773965	0.290254	1	-0.0135833	0.425155	0.212699	1	0.0345603	0.327322	0.226282	1	0.0481436	1	-0.178138	-0.375483	FALSE	HYPER	0	TRUE	HYPO	0	FALSE	0	0	FALSE	0	0
									ANKRD27	1	-0.000619754	0.0360179	0.180082	0.0463496	0.191753	1	0.116422	0.395353	0.180702	0.289809	0.192373	1	0.117042	1	0.0116709	1	-0.0636605	1	-0.0753314	-0.375194	FALSE	HYPER	0	TRUE	HYPO	HYPO	FALSE	0	0	FALSE	0	0
									BASP1	0.103061	0.329914	0.0115259	0.240853	0.437922	0.134463	1	0.15553	1	-0.0890607	0.450433	-0.195451	1	-0.174384	1	-0.10639	1	-0.0853233	1	0.021067	-0.374943	FALSE	0	0	TRUE	HYPO	HYPO	FALSE	HYPER	0	TRUE	0	0
									TMEM123	1	-0.000357682	0.0336573	0.191226	0.00109768	0.297735	1	0.193597	0.38807	0.191584	0.0376011	0.298093	1	0.193955	1	0.106509	1	0.002371	1	-0.104138	-0.374656	FALSE	HYPER	0	FALSE	HYPO	0	FALSE	0	0	FALSE	0	0
									KIAA0423	1	-0.196132	0.00603558	-0.339739	0.00877525	-0.359638	1	-0.0834229	1	-0.143606	0.959501	-0.163505	1	0.11271	1	-0.0198991	1	0.256316	1	0.276215	-0.374469	FALSE	HYPO	0	TRUE	HYPER	HYPER	FALSE	0	0	FALSE	0	0
									LAPTM4B	1	0.177026	1.10185e-05	0.715473	0.0579334	0.393046	0.818115	0.47657	0.0978891	0.538447	0.998062	0.21602	1	0.299544	0.663018	-0.322427	1	-0.238903	1	0.0835244	-0.374051	FALSE	0	0	TRUE	HYPO	HYPO	FALSE	0	0	TRUE	HYPER	0
									MYT1L	0.988926	0.205722	1	-0.0364645	0.283255	-0.191505	1	0.261718	0.472664	-0.242186	0.0423798	-0.397226	1	0.0559959	1	-0.15504	1	0.298182	0.397407	0.453222	-0.373947	TRUE	HYPO	HYPO	FALSE	0	0	TRUE	0	0	FALSE	0	0
									SFRS5	1	-0.0375474	0.00958375	-0.288898	0.0474136	-0.261199	1	-0.260797	0.374169	-0.251351	0.486386	-0.223652	1	-0.223249	1	0.0276989	1	0.0281016	1	0.00040273	-0.373728	FALSE	0	0	TRUE	HYPER	0	FALSE	0	0	FALSE	HYPO	0
									SAMD5	1	0.229638	0.0720481	0.325989	0.000337436	0.614802	1	0.0979083	1	0.0963507	0.289809	0.385164	1	-0.13173	0.782194	0.288813	1	-0.22808	0.586351	-0.516893	-0.37361	TRUE	HYPER	HYPER	TRUE	HYPO	0	FALSE	0	0	FALSE	0	0
									PROM1	0.969562	0.130365	4.64154e-06	0.313991	0.000825404	0.257616	0.371934	0.268327	0.249982	0.183626	0.665649	0.127251	1	0.137962	1	-0.056375	1	-0.0456639	1	0.0107111	-0.373013	FALSE	0	0	TRUE	HYPO	HYPO	FALSE	0	0	FALSE	HYPER	0
									CABLES1	1	-0.100847	0.00781231	-0.20884	0.00495113	-0.240588	1	-0.00886219	0.967836	-0.107994	0.649166	-0.139741	1	0.0919846	1	-0.0317475	1	0.199978	0.693025	0.231726	-0.372955	FALSE	HYPO	0	TRUE	HYPER	0	FALSE	0	0	FALSE	0	0
									NDUFC2	1	-0.150683	0.234782	-0.177289	0.0037664	-0.352332	0.666927	-0.3509	1	-0.0266056	0.636261	-0.201648	1	-0.200217	1	-0.175043	1	-0.173611	1	0.00143146	-0.372907	TRUE	HYPO	0	TRUE	HYPER	HYPER	FALSE	0	0	FALSE	0	0
									MRPL41	1	-0.0539361	0.00098844	-0.386565	0.000493053	-0.446242	0.872016	-0.322363	0.183284	-0.332629	0.0594091	-0.392306	1	-0.268427	1	-0.0596776	1	0.0642017	1	0.123879	-0.372716	FALSE	HYPO	0	TRUE	HYPER	0	FALSE	0	0	FALSE	0	0
									CAMK2N2	0.244407	0.239361	0.00355138	0.23242	0.718231	0.0856334	1	0.0647467	1	-0.00694159	0.564204	-0.153728	1	-0.174615	0.73399	-0.146786	1	-0.167673	1	-0.0208867	-0.372266	FALSE	0	0	TRUE	HYPO	0	FALSE	HYPER	0	TRUE	0	0
									ITGA6	1	0.138886	0.0370874	0.272221	0.0212252	0.322648	1	0.294408	1	0.133335	0.846174	0.183762	1	0.155522	1	0.0504265	1	0.022187	1	-0.0282395	-0.372019	FALSE	HYPER	0	TRUE	HYPO	0	FALSE	0	0	FALSE	0	0
									TTC8	1	-0.0545241	0.00767976	-0.21324	0.000150987	-0.317921	1	-0.166116	0.544322	-0.158716	0.0542581	-0.263397	1	-0.111592	1	-0.104681	1	0.0471241	1	0.151805	-0.371534	FALSE	HYPO	0	TRUE	HYPER	0	FALSE	0	0	FALSE	0	0
									MCM2	0.739856	0.159782	7.32299e-05	0.286227	0.146549	0.147398	0.34454	0.287731	0.775259	0.126445	1	-0.0123845	1	0.127949	0.717328	-0.138829	1	0.00150477	1	0.140334	-0.371153	FALSE	0	0	TRUE	HYPO	HYPO	FALSE	0	0	TRUE	HYPER	0
									DUSP10	0.375642	-0.194431	0.944546	0.0464018	0.959022	0.0470583	1	-0.0231424	0.0774155	0.240833	0.0567013	0.24149	1	0.171289	1	0.000656551	1	-0.0695442	1	-0.0702008	-0.37099	FALSE	0	0	FALSE	0	0	FALSE	HYPO	0	FALSE	HYPER	0
									UBE2J1	0.971643	-0.221588	0.00872311	0.324178	0.448139	0.173629	1	-0.020401	0.00568195	0.545766	0.0636658	0.395217	1	0.201187	1	-0.150548	1	-0.344579	1	-0.19403	-0.370772	FALSE	0	0	FALSE	0	0	FALSE	HYPO	0	TRUE	HYPER	0
									KIAA0319L	1	-0.16733	0.000167671	-0.349929	0.00023395	-0.37726	1	-0.175881	0.620254	-0.182599	0.399222	-0.20993	1	-0.00855108	1	-0.0273315	1	0.174048	1	0.201379	-0.370752	FALSE	HYPO	0	TRUE	HYPER	HYPER	FALSE	0	0	FALSE	0	0
									SEMA3F	0.371387	-0.272988	0.000314475	-0.357044	0.00683475	-0.306992	1	-0.202004	1	-0.0840565	1	-0.0340036	1	0.0709838	1	0.0500529	1	0.15504	1	0.104987	-0.370675	FALSE	0	0	TRUE	HYPER	HYPER	FALSE	0	0	FALSE	HYPO	0
									BTC	1	0.0751032	3.34036e-05	0.244899	0.00564233	0.188589	0.371934	0.230585	0.187434	0.169796	0.621903	0.113486	1	0.155482	1	-0.0563094	1	-0.0143139	1	0.0419954	-0.370674	FALSE	0	0	TRUE	HYPO	0	FALSE	0	0	FALSE	HYPER	0
									ARHGAP21	0.0200926	0.359706	2.41245e-06	0.376909	0.00217828	0.278576	0.779207	0.240046	1	0.0172025	1	-0.0811306	1	-0.119661	1	-0.0983331	1	-0.136863	1	-0.0385302	-0.370255	FALSE	0	0	TRUE	HYPO	0	FALSE	0	0	FALSE	HYPER	0
									RPL22L1	1	0.145063	0.000223167	0.296541	0.00280435	0.271074	1	0.130971	0.670715	0.151477	0.83951	0.126011	1	-0.014092	1	-0.0254666	1	-0.165569	1	-0.140103	-0.369987	FALSE	0	0	TRUE	HYPO	HYPO	FALSE	0	0	FALSE	HYPER	0
									TNFRSF11B	0.988926	0.1508	0.0205573	0.202149	0.00379729	0.266793	1	0.0764023	1	0.0513486	0.928139	0.115992	1	-0.074398	1	0.0646437	1	-0.125747	1	-0.19039	-0.369207	FALSE	HYPER	0	TRUE	HYPO	0	FALSE	0	0	FALSE	0	0
				X					CASP1	1	0.056405	0.00411796	0.243726	0.173305	0.160582	0.725424	0.257268	0.418999	0.187321	1	0.104177	1	0.200863	1	-0.0831437	1	0.0135423	1	0.096686	-0.369059	FALSE	0	0	TRUE	HYPO	HYPER	FALSE	0	0	TRUE	0	0
									ROGDI	0.481624	-0.313737	0.00189268	-0.388315	0.0148855	-0.349179	1	-0.122448	1	-0.0745778	1	-0.035442	1	0.19129	1	0.0391358	1	0.265867	1	0.226732	-0.368757	FALSE	0	0	TRUE	HYPER	0	FALSE	0	0	FALSE	HYPO	0
									TRIM22	1	0.134596	1.16809e-05	0.494429	8.50942e-05	0.490508	1	0.243173	0.114877	0.359834	0.097146	0.355913	1	0.108577	1	-0.00392115	1	-0.251256	1	-0.247335	-0.368465	FALSE	0	0	TRUE	HYPO	0	FALSE	0	0	FALSE	HYPER	0
									OPTN	0.108973	0.289298	0.0233739	0.197272	0.0142413	0.230947	1	0.162322	1	-0.092026	1	-0.0583519	1	-0.126977	1	0.0336742	1	-0.0349508	1	-0.0686249	-0.368378	FALSE	0	0	TRUE	HYPO	HYPER	FALSE	HYPER	0	FALSE	0	0
									ME2	1	0.0224098	3.55796e-06	0.303331	1.91442e-05	0.308503	1	0.132195	0.0148511	0.280922	0.0105127	0.286093	1	0.109786	1	0.0051716	1	-0.171136	0.887218	-0.176308	-0.368239	FALSE	HYPER	0	FALSE	HYPO	0	FALSE	0	0	FALSE	0	0
									FZD6	0.507076	0.319819	0.0579155	0.27388	1	-0.0242444	1	0.178492	1	-0.0459392	0.191885	-0.344063	1	-0.141327	0.315273	-0.298124	1	-0.0953876	1	0.202737	-0.368219	FALSE	HYPO	0	FALSE	0	0	FALSE	HYPER	0	FALSE	0	0
									UBE3C	0.614409	0.341568	4.06784e-06	0.654949	0.259504	0.254263	0.531755	0.507423	0.474088	0.313381	1	-0.0873049	1	0.165854	0.136142	-0.400686	1	-0.147527	1	0.253159	-0.367993	FALSE	0	0	TRUE	HYPO	HYPO	FALSE	0	0	TRUE	HYPER	0
									SAMHD1	1	-0.072809	0.00365027	0.253883	0.00335111	0.281092	1	0.0472325	0.0343176	0.326692	0.0138124	0.353902	1	0.120042	1	0.0272099	1	-0.20665	0.836378	-0.23386	-0.367834	FALSE	HYPER	0	FALSE	0	0	FALSE	HYPO	0	FALSE	0	0
									HOXC10	1	-0.275062	0.121296	0.340037	0.0550663	0.428024	1	0.260723	0.071177	0.6151	0.0212404	0.703086	1	0.535785	1	0.0879862	1	-0.0793143	1	-0.1673	-0.367719	TRUE	HYPER	0	FALSE	0	0	TRUE	HYPO	HYPO	FALSE	0	0
									DOK2	0.439669	-0.201215	0.96868	0.0445341	0.728864	0.083667	1	-0.00868871	0.106101	0.245749	0.0328284	0.284882	1	0.192527	1	0.0391328	1	-0.0532229	1	-0.0923557	-0.367661	TRUE	HYPER	0	FALSE	0	0	TRUE	HYPO	HYPO	FALSE	0	0
									CAV2	0.0116953	0.340322	2.64255e-06	0.337637	9.96624e-07	0.386345	1	0.149269	1	-0.00268546	1	0.0460228	1	-0.191054	1	0.0487083	1	-0.188368	0.611316	-0.237076	-0.367355	FALSE	HYPER	0	TRUE	HYPO	0	FALSE	0	0	FALSE	0	0
									CYP39A1	0.307566	0.46982	0.0514294	0.35627	0.0103782	0.479996	0.689942	0.514935	1	-0.11355	1	0.0101759	1	0.0451153	1	0.123726	1	0.158665	1	0.0349395	-0.366597	TRUE	0	0	TRUE	HYPO	0	FALSE	0	0	FALSE	0	0
									IL7R	1	0.0978015	0.000204105	0.271288	0.00170548	0.257053	0.522428	0.259758	0.371425	0.173487	0.43977	0.159251	1	0.161956	1	-0.0142355	1	-0.0115307	1	0.00270475	-0.366465	FALSE	0	0	TRUE	HYPO	HYPO	FALSE	0	0	FALSE	HYPER	0
									IL20	0.035149	-0.296679	6.04542e-05	-0.280539	2.64303e-05	-0.323189	1	-0.103751	1	0.0161398	1	-0.02651	1	0.192927	1	-0.0426498	1	0.176788	0.679009	0.219437	-0.365903	FALSE	HYPO	0	TRUE	HYPER	0	FALSE	0	0	FALSE	0	0
									PSMC5	1	0.0667524	0.516792	-0.0869281	0.0601183	-0.163628	1	-0.0522102	0.444115	-0.153681	0.0651114	-0.23038	1	-0.118963	1	-0.0766995	1	0.0347179	1	0.111417	-0.365787	FALSE	HYPO	0	FALSE	0	0	FALSE	HYPER	0	FALSE	0	0
									ARHGAP15	1	0.0333529	0.0343894	0.158244	0.042206	0.169871	0.804179	0.19945	0.702499	0.124891	0.549019	0.136518	1	0.166097	1	0.0116273	1	0.041206	1	0.0295786	-0.365751	FALSE	0	0	TRUE	HYPO	HYPO	FALSE	0	0	FALSE	0	0
									GPR39	0.0329672	-0.323608	0.00214918	-0.239345	0.000648505	-0.288074	1	-0.156321	1	0.0842628	1	0.0355338	1	0.167287	1	-0.048729	1	0.0830246	1	0.131754	-0.36565	FALSE	0	0	TRUE	HYPER	0	FALSE	HYPO	0	FALSE	0	0
									LRP4	0.000834551	0.50013	6.64445e-11	0.59516	1.56621e-10	0.635561	1	0.156467	1	0.0950302	0.865786	0.135431	1	-0.343664	1	0.0404005	1	-0.438694	0.221933	-0.479094	-0.365494	FALSE	HYPER	0	TRUE	HYPO	0	FALSE	0	0	FALSE	0	0
									RABEP1	0.263157	-0.268762	0.000109097	-0.341058	0.00106986	-0.32286	0.367551	-0.345036	1	-0.0722961	1	-0.0540985	1	-0.0762741	1	0.0181976	1	-0.00397804	1	-0.0221757	-0.364959	FALSE	0	0	TRUE	HYPER	0	FALSE	0	0	FALSE	HYPO	0
									CD47	0.229232	0.303239	0.00585953	0.277263	0.0610971	0.228819	1	0.0667344	1	-0.0259758	1	-0.0744194	1	-0.236504	1	-0.0484437	1	-0.210529	1	-0.162085	-0.364746	FALSE	0	0	TRUE	HYPO	HYPER	FALSE	HYPER	0	TRUE	0	0
									APBB2	1	-0.0263322	0.013949	-0.237318	0.0595791	-0.216459	1	0.0476787	0.400016	-0.210986	0.498348	-0.190127	1	0.0740109	1	0.0208591	1	0.284997	0.78961	0.264138	-0.364381	FALSE	0	0	TRUE	0	0	FALSE	0	0	TRUE	HYPO	0
									ZNF385A	0.0377209	-0.356237	0.000336995	-0.308059	0.170695	-0.168072	1	-0.214043	1	0.0481781	0.429027	0.188165	1	0.142194	1	0.139987	1	0.0940156	1	-0.0459714	-0.364131	FALSE	0	0	TRUE	HYPER	0	FALSE	HYPO	0	FALSE	0	0
									ZNF621	1	0.0992263	0.304187	-0.139617	0.0717702	-0.209132	1	-0.0245247	0.255831	-0.238843	0.0578547	-0.308358	1	-0.123751	1	-0.069515	1	0.115092	1	0.184607	-0.36406	FALSE	HYPO	0	FALSE	0	0	FALSE	HYPER	0	FALSE	0	0
									FAM57A	0.470656	0.261593	0.00241902	0.315143	0.796953	0.10067	1	0.101638	1	0.0535496	0.827363	-0.160923	1	-0.159955	0.513752	-0.214473	1	-0.213505	1	0.000968083	-0.363929	FALSE	0	0	TRUE	HYPO	0	FALSE	0	0	TRUE	HYPER	0
									KITLG	1	-0.133679	0.0128686	-0.200352	0.084275	-0.171281	1	-0.0505236	1	-0.066673	1	-0.0376024	1	0.0831551	1	0.0290706	1	0.149828	1	0.120758	-0.363099	FALSE	0	0	TRUE	HYPER	0	FALSE	0	0	TRUE	HYPO	HYPO
									SOX9	0.411962	0.35424	5.52374e-07	0.656428	4.48231e-06	0.658694	0.524335	0.469252	0.41473	0.302188	0.373046	0.304455	1	0.115012	1	0.00226617	1	-0.187176	1	-0.189442	-0.362804	FALSE	HYPER	0	TRUE	HYPO	HYPO	FALSE	0	0	FALSE	0	0
									PHGDH	1	0.00394435	0.064668	0.24228	0.00211992	0.392505	1	0.130284	0.527789	0.238335	0.0561088	0.38856	1	0.12634	1	0.150225	1	-0.111995	1	-0.26222	-0.362615	TRUE	HYPER	HYPER	TRUE	HYPO	0	FALSE	0	0	FALSE	0	0
		X							VIM	1	0.241007	0.00125802	0.433274	0.0048651	0.424388	1	0.30975	0.957497	0.192267	0.952539	0.183381	1	0.0687429	1	-0.00888544	1	-0.123524	1	-0.114638	-0.362521	FALSE	0	0	TRUE	HYPO	0	FALSE	0	0	FALSE	HYPER	0
									DCUN1D3	1	-0.0637429	8.3363e-07	-0.368183	0.00137604	-0.270048	1	-0.17729	0.0240272	-0.30444	0.189003	-0.206305	1	-0.113547	1	0.098135	1	0.190893	1	0.0927578	-0.36187	FALSE	0	0	FALSE	HYPER	0	FALSE	0	0	FALSE	HYPO	0
									STXBP2	1	8.69739e-05	0.00628351	-0.19102	0.000165892	-0.277134	1	-0.137103	0.187434	-0.191107	0.0149551	-0.277221	1	-0.13719	1	-0.0861142	1	0.0539166	1	0.140031	-0.361562	FALSE	HYPO	0	FALSE	HYPER	0	FALSE	0	0	FALSE	0	0
									SNCA	0.0602515	0.558947	0.00399638	0.419339	9.27582e-05	0.602983	1	0.176884	1	-0.139608	1	0.0440361	1	-0.382062	1	0.183644	1	-0.242454	0.726908	-0.426098	-0.360588	FALSE	HYPER	0	TRUE	HYPO	0	FALSE	0	0	FALSE	0	0
									PLEKHO1	1	0.00700838	0.000167114	0.343758	0.000889875	0.338249	1	-0.00693272	0.0468743	0.33675	0.0392775	0.331241	1	-0.0139411	1	-0.00550877	1	-0.350691	0.457842	-0.345182	-0.360536	FALSE	0	0	FALSE	0	0	FALSE	0	0	FALSE	HYPER	0
									ARHGAP26	1	0.172673	0.261891	0.218508	0.00239096	0.464987	1	-0.096442	1	0.0458346	0.458353	0.292314	1	-0.269115	0.831541	0.246479	1	-0.31495	0.388088	-0.561429	-0.360248	TRUE	HYPER	HYPER	TRUE	0	0	FALSE	0	0	FALSE	0	0
									C19orf54	1	-0.133313	0.00038196	-0.395537	0.0135891	-0.319706	1	-0.265928	0.374885	-0.262223	0.768412	-0.186393	1	-0.132615	1	0.0758307	1	0.129608	1	0.0537778	-0.36012	FALSE	0	0	TRUE	HYPER	HYPER	FALSE	0	0	FALSE	HYPO	0
									MAGI3	1	-0.0685985	0.061275	-0.205864	0.0846056	-0.215124	1	0.0567659	0.969206	-0.137265	0.864612	-0.146526	1	0.125364	1	-0.00926064	1	0.262629	0.812485	0.27189	-0.359932	FALSE	0	0	FALSE	0	0	FALSE	0	0	FALSE	HYPO	0
									POLR2L	1	0.0410392	0.00105626	-0.381293	0.0413311	-0.288286	1	-0.167974	0.0469696	-0.422332	0.152893	-0.329326	1	-0.209013	1	0.0930065	1	0.213319	1	0.120312	-0.359524	FALSE	0	0	FALSE	0	0	FALSE	HYPER	0	FALSE	HYPO	0
									PDE4B	0.240561	0.233396	0.0021483	0.235818	0.00168297	0.26438	1	0.18335	1	0.00242184	1	0.0309838	1	-0.0500458	1	0.028562	1	-0.0524677	1	-0.0810297	-0.359074	FALSE	HYPER	0	TRUE	HYPO	0	FALSE	0	0	FALSE	0	0
									GDAP1	1	0.0856191	0.84738	-0.0641967	0.0523838	-0.18546	1	0.00775001	0.621414	-0.149816	0.0457235	-0.271079	1	-0.0778691	1	-0.121263	1	0.0719467	0.952157	0.19321	-0.358881	TRUE	HYPO	0	FALSE	0	0	TRUE	HYPER	HYPER	FALSE	0	0
									FMN1	0.901821	-0.163412	1.24523e-07	-0.434784	2.06382e-08	-0.50754	1	-0.0506177	0.0965881	-0.271372	0.0143203	-0.344128	1	0.112794	1	-0.0727563	1	0.384166	0.221933	0.456922	-0.358725	FALSE	HYPO	0	FALSE	HYPER	0	FALSE	0	0	FALSE	0	0
									ALCAM	0.547384	-0.205579	0.0455088	-0.18654	7.4496e-05	-0.359753	1	-0.068325	1	0.019039	0.653196	-0.154174	1	0.137254	0.543117	-0.173213	1	0.118215	0.536103	0.291428	-0.35781	FALSE	HYPO	0	TRUE	HYPER	0	FALSE	0	0	FALSE	0	0
									SPATA17	1	0.155935	0.0870525	0.21051	0.962366	-0.067739	1	0.0380928	1	0.0545754	0.45353	-0.223674	1	-0.117842	0.16946	-0.278249	1	-0.172417	1	0.105832	-0.357757	FALSE	HYPO	0	FALSE	0	0	FALSE	0	0	FALSE	HYPER	0
									ZNF740	1	0.100367	0.107267	-0.150803	0.617464	-0.0960035	1	-0.0224084	0.0994001	-0.25117	0.261516	-0.196371	1	-0.122776	1	0.054799	1	0.128394	1	0.0735952	-0.357585	FALSE	0	0	FALSE	0	0	FALSE	HYPER	0	FALSE	HYPO	0
									CX3CL1	1	0.0555429	0.0696501	0.240683	0.000469313	0.44126	1	0.272938	0.856175	0.18514	0.0603395	0.385717	1	0.217395	0.88784	0.200578	1	0.0322553	1	-0.168322	-0.357219	TRUE	HYPER	HYPER	TRUE	HYPO	HYPER	FALSE	0	0	FALSE	0	0
									LRRC51	1	-0.0897244	0.584719	-0.16295	0.0147708	-0.394844	1	0.00172593	1	-0.0732251	0.424131	-0.305119	1	0.0914504	0.981094	-0.231894	1	0.164675	0.795668	0.39657	-0.357168	TRUE	HYPO	HYPO	TRUE	HYPER	0	FALSE	0	0	FALSE	0	0
									RNF170	0.359581	-0.468676	1.05631e-06	-0.809025	2.19812e-09	HYPO,10390518868444	0.188163	-0.773431	0.570493	-0.340349	0.0291781	-0.635229	1	-0.304755	0.883897	-0.294881	1	0.0355939	1	0.330474	-0.357095	FALSE	HYPO	0	FALSE	HYPER	0	FALSE	0	0	FALSE	0	0
x									RBP1	1	0.103952	7.88812e-06	0.512631	0.00119667	0.419291	0.998108	0.292254	0.0632865	0.408679	0.193086	0.31534	1	0.188302	1	-0.0933393	1	-0.220377	1	-0.127038	-0.356908	FALSE	0	0	TRUE	HYPO	HYPO	FALSE	0	0	FALSE	HYPER	0
									A2ML1	0.686302	0.22439	2.26167e-05	0.414033	3.73837e-07	0.54577	0.225251	0.434557	0.645909	0.189642	0.0765794	0.321379	1	0.210166	1	0.131737	1	0.020524	1	-0.111213	-0.356866	FALSE	HYPER	0	TRUE	HYPO	0	FALSE	0	0	FALSE	0	0
									PRLR	1	-0.140409	0.0169321	-0.24362	0.00143548	-0.341157	1	0.00569812	1	-0.103211	0.490995	-0.200748	1	0.146108	1	-0.097537	1	0.249318	0.505641	0.346855	-0.356504	FALSE	HYPO	0	TRUE	0	0	FALSE	0	0	FALSE	0	0
									PARVG	0.302068	0.28393	0.0040829	0.2884	0.0106958	0.287652	0.189476	0.44707	1	0.00447054	1	0.00372243	1	0.16314	1	-0.00074811	1	0.158669	1	0.159417	-0.356341	FALSE	0	0	TRUE	HYPO	HYPO	FALSE	0	0	FALSE	0	0
x									IRAK3	0.275417	0.232002	0.00583185	0.221551	0.00710005	0.238878	1	0.121681	1	-0.010451	1	0.00687594	1	-0.110321	1	0.0173269	1	-0.0998698	1	-0.117197	-0.356132	FALSE	0	0	TRUE	HYPO	HYPO	FALSE	HYPER	0	FALSE	0	0
									FMNL1	1	-0.0967792	0.14123	0.150509	0.00134335	0.290647	1	0.105887	0.135701	0.247288	0.00412221	0.387426	1	0.202666	0.913096	0.140138	1	-0.0446217	1	-0.18476	-0.355698	TRUE	HYPER	0	FALSE	0	0	FALSE	HYPO	0	FALSE	0	0
									TOB1	1	-0.114638	0.000858091	-0.401385	0.000117279	-0.502222	1	-0.0908	0.355252	-0.286747	0.076507	-0.387584	1	0.0238379	1	-0.100837	1	0.310585	0.543289	0.411422	-0.355416	FALSE	HYPO	0	TRUE	HYPER	HYPER	FALSE	0	0	FALSE	0	0
									PRKCH	1	-0.0988641	0.35325	0.138701	0.162335	0.187475	1	-0.0145403	0.306357	0.237565	0.113575	0.28634	1	0.0843238	1	0.0487744	1	-0.153241	1	-0.202016	-0.355276	FALSE	HYPER	0	FALSE	0	0	FALSE	HYPO	0	FALSE	0	0
									KMO	0.108973	-0.454337	0.00939784	-0.344593	0.0517476	-0.306825	1	-0.0791294	1	0.109744	1	0.147512	1	0.375208	1	0.0377675	1	0.265464	1	0.227696	-0.354557	FALSE	0	0	TRUE	HYPER	HYPER	FALSE	HYPO	0	TRUE	0	0
									SLA2	1	0.015889	0.000847166	0.197918	0.000243756	0.236822	1	0.0881132	0.122864	0.182029	0.0302727	0.220933	1	0.0722242	1	0.0389036	1	-0.109805	0.951808	-0.148709	-0.354481	FALSE	HYPER	0	FALSE	HYPO	0	FALSE	0	0	FALSE	0	0
									PNPLA3	1	0.0370691	0.153964	0.137107	0.00627479	0.235653	1	0.0541799	1	0.100038	0.223685	0.198584	1	0.0171109	1	0.0985462	1	-0.0829272	1	-0.181473	-0.353945	TRUE	HYPER	HYPER	TRUE	HYPO	0	FALSE	0	0	FALSE	0	0
									TPM1	1	-0.0560723	0.504168	-0.0984423	0.518669	0.10622	1	-0.0616066	1	-0.04237	0.488747	0.162293	1	-0.00553424	0.180962	0.204663	1	0.0368357	1	-0.167827	-0.353748	FALSE	HYPER	0	FALSE	0	0	FALSE	0	0	FALSE	HYPO	0
									ADORA2B	0.324193	0.254219	0.00106484	0.293495	1.24149e-05	0.420848	0.979656	0.22709	1	0.0392758	0.634326	0.166629	1	-0.0271292	1	0.127354	1	-0.0664049	1	-0.193759	-0.353543	FALSE	HYPER	0	TRUE	HYPO	HYPER	FALSE	0	0	FALSE	0	0
									LARP6	0.493893	0.154268	0.0031036	0.184157	0.000266227	0.242956	1	0.0902198	1	0.0298884	0.906128	0.0886877	1	-0.0640485	1	0.0587993	1	-0.0939369	0.9522	-0.152736	-0.353474	FALSE	HYPER	0	TRUE	HYPO	HYPER	FALSE	0	0	FALSE	0	0
									TPM4	1	0.192619	0.00479465	0.394917	0.0252253	0.361658	1	0.190318	0.93282	0.202298	1	0.169039	1	-0.00230147	1	-0.0332593	1	-0.204599	1	-0.17134	-0.353364	FALSE	0	0	TRUE	HYPO	HYPO	FALSE	0	0	FALSE	HYPER	0
									CDGAP	1	0.101346	1.52891e-05	0.329118	9.26869e-08	0.448204	0.958228	0.200394	0.156775	0.227772	0.00750537	0.346858	1	0.0990475	1	0.119086	1	-0.128724	0.626256	-0.247811	-0.353117	FALSE	HYPER	0	FALSE	HYPO	0	FALSE	0	0	FALSE	0	0
									MCHR1	0.995912	-0.189901	0.000119144	-0.395363	0.00099109	-0.378411	0.581555	-0.352928	0.596507	-0.205462	0.671825	-0.18851	1	-0.163028	1	0.0169519	1	0.042434	1	0.0254822	-0.353106	FALSE	0	0	TRUE	HYPER	HYPER	FALSE	0	0	FALSE	HYPO	0
									AP1M2	1	-0.0160314	0.0469754	-0.273621	0.014119	-0.3517	1	-0.233231	0.524872	-0.25759	0.187428	-0.335668	1	-0.217199	1	-0.0780781	1	0.0403906	1	0.118469	-0.352891	FALSE	HYPO	0	TRUE	HYPER	0	FALSE	0	0	FALSE	0	0
									NUP153	1	0.0341253	0.0114911	0.220211	0.0504785	0.201377	1	0.107024	0.433763	0.186085	0.539039	0.167251	1	0.0728985	1	-0.0188339	1	-0.113187	1	-0.0943529	-0.352876	FALSE	0	0	TRUE	HYPO	HYPO	FALSE	0	0	TRUE	HYPER	0
									CDC123	0.8928	0.194857	0.000241912	0.360069	0.00452402	0.317015	1	0.24456	0.810285	0.165212	1	0.122158	1	0.0497029	1	-0.0430545	1	-0.115509	1	-0.072455	-0.35262	FALSE	0	0	TRUE	HYPO	HYPO	FALSE	0	0	FALSE	HYPER	0
									B3GNT3	1	0.092167	0.0420134	0.188791	0.000434232	0.323219	1	0.201772	1	0.0966239	0.176584	0.231052	1	0.109605	1	0.134428	1	0.0129814	1	-0.121447	-0.352465	FALSE	HYPER	0	TRUE	HYPO	0	FALSE	0	0	FALSE	0	0
									AP2B1	1	-0.0914623	0.00073596	-0.32437	3.41142e-05	-0.430044	1	-0.185473	0.335615	-0.232908	0.0442338	-0.338581	1	-0.0940102	1	-0.105674	1	0.138897	0.940822	0.244571	-0.352383	FALSE	HYPO	0	FALSE	HYPER	0	FALSE	0	0	FALSE	0	0
									COL27A1	1	0.126779	0.0928273	0.174919	0.00180089	0.30488	1	0.137177	1	0.0481399	0.52685	0.178101	1	0.010398	1	0.129961	1	-0.0377419	1	-0.167703	-0.35212	TRUE	HYPER	0	TRUE	HYPO	HYPO	FALSE	0	0	FALSE	0	0
									CAPN6	1	0.0710094	0.0131198	0.218367	0.00108957	0.303258	1	0.144839	0.753363	0.147357	0.173387	0.232249	1	0.0738298	1	0.0848914	1	-0.0735274	1	-0.158419	-0.352078	FALSE	HYPER	0	TRUE	HYPO	HYPER	FALSE	0	0	FALSE	0	0
									NFIL3	0.025956	0.718356	3.96724e-05	0.67275	0.00030245	0.657447	1	0.169986	1	-0.0456065	1	-0.0609093	1	-0.548371	1	-0.0153029	1	-0.502764	0.757336	-0.487461	-0.351999	FALSE	0	0	TRUE	HYPO	0	FALSE	HYPER	0	FALSE	0	0
									ENDOD1	1	-0.107024	0.902952	0.0436401	0.33976	0.0955089	1	-0.0390449	0.28114	0.150664	0.0524696	0.202533	1	0.0679794	1	0.0518688	1	-0.082685	1	-0.134554	-0.351543	FALSE	HYPER	0	FALSE	0	0	FALSE	HYPO	0	FALSE	0	0
									GABRP	0.955992	0.183695	2.83229e-05	0.400509	0.00121287	0.348999	0.188163	0.445705	0.435877	0.216815	0.747772	0.165304	1	0.262011	1	-0.0515107	1	0.0451961	1	0.0967068	-0.351268	FALSE	0	0	TRUE	HYPO	HYPO	FALSE	0	0	FALSE	0	0
									HLA-E	1	0.077835	5.75508e-05	0.28706	0.00117397	0.26041	1	0.162327	0.172079	0.209225	0.263701	0.182575	1	0.0844915	1	-0.0266504	1	-0.124733	1	-0.098083	-0.351094	FALSE	0	0	TRUE	HYPO	HYPO	FALSE	0	0	FALSE	HYPER	0
									PKIA	0.341516	0.399457	0.149654	0.259095	0.00126736	0.508519	1	0.274993	1	-0.140363	1	0.109062	1	-0.124465	0.879184	0.249425	1	0.015898	1	-0.233527	-0.350735	TRUE	HYPER	HYPER	TRUE	HYPO	0	FALSE	0	0	FALSE	0	0
									LGALS9	1	-0.0908755	1	0.0253008	0.0221344	0.289353	1	0.00272225	1	0.116176	0.0427543	0.380228	1	0.0935977	0.248771	0.264052	1	-0.0225785	0.874727	-0.28663	-0.350691	TRUE	HYPER	HYPER	FALSE	0	0	FALSE	HYPO	0	FALSE	0	0
									IFIT3	0.995912	-0.12556	0.916047	0.0491096	0.244291	0.122677	1	0.099353	0.287618	0.17467	0.0379398	0.248237	1	0.224913	1	0.0735673	1	0.0502433	1	-0.023324	-0.350348	TRUE	HYPER	HYPER	FALSE	0	0	TRUE	HYPO	0	FALSE	0	0
									GAB1	0.0881607	-0.234756	5.00419e-06	-0.280597	0.000378198	-0.243577	0.188163	-0.287407	1	-0.045841	1	-0.00882087	1	-0.052651	1	0.0370201	1	-0.00681007	1	-0.0438302	-0.35021	FALSE	0	0	TRUE	HYPER	0	FALSE	0	0	FALSE	0	0
									NECAP2	1	-0.0433416	0.033123	0.19698	0.808916	0.0819884	1	-0.0114	0.185246	0.240321	0.889913	0.12533	1	0.0319416	1	-0.114991	1	-0.20838	1	-0.0933884	-0.350133	FALSE	0	0	TRUE	0	0	FALSE	HYPO	0	TRUE	HYPER	0
									EMP2	1	-0.0142557	0.0028411	-0.257983	0.158063	-0.167947	1	-0.0200603	0.175988	-0.243727	0.671825	-0.153692	1	-0.00580454	1	0.0900359	1	0.237923	1	0.147887	-0.350053	FALSE	0	0	TRUE	HYPER	0	FALSE	0	0	TRUE	HYPO	0
									ZNF462	0.118677	0.621404	3.61471e-07	0.88504	3.28838e-09	1.1416	0.567091	0.606213	0.93137	0.263636	0.128464	0.520195	1	-0.0151916	1	0.256559	1	-0.278827	0.716431	-0.535386	-0.350012	FALSE	HYPER	0	TRUE	HYPO	0	FALSE	0	0	FALSE	0	0
									FGD6	1	-0.110429	0.0116987	-0.286289	0.0157444	-0.305434	1	-0.230299	0.844994	-0.17586	0.679914	-0.195005	1	-0.11987	1	-0.0191451	1	0.0559897	1	0.0751348	-0.349935	FALSE	HYPO	0	TRUE	HYPER	HYPER	FALSE	0	0	FALSE	0	0
									CXXC6	0.907922	0.141062	2.10896e-07	0.37005	2.68227e-07	0.40273	1	0.153184	0.11053	0.228988	0.0378943	0.261668	1	0.0121216	1	0.0326799	1	-0.216867	0.541074	-0.249547	-0.34987	FALSE	HYPER	0	FALSE	HYPO	0	FALSE	0	0	FALSE	0	0
									SLC44A4	0.213952	-0.26003	0.00135031	-0.266368	0.000406085	-0.318927	1	-0.155588	1	-0.00633811	1	-0.0588977	1	0.104442	1	-0.0525596	1	0.11078	1	0.16334	-0.34925	FALSE	HYPO	0	TRUE	HYPER	HYPER	FALSE	0	0	FALSE	0	0
									KCNK6	1	0.0538958	0.0303563	-0.173385	0.110025	-0.156828	1	-0.136769	0.122564	-0.227281	0.149555	-0.210724	1	-0.190664	1	0.016557	1	0.0366166	1	0.0200596	-0.349075	FALSE	0	0	TRUE	0	0	FALSE	HYPER	0	TRUE	HYPO	0
									C1orf181	0.591081	0.205792	0.0908753	0.171989	1	-0.00951527	1	0.0919382	1	-0.0338023	0.270901	-0.215307	1	-0.113854	0.506332	-0.181505	1	-0.0800512	1	0.101454	-0.348506	FALSE	HYPO	0	FALSE	0	0	FALSE	HYPER	0	FALSE	0	0
									IVNS1ABP	1	0.119103	4.0452e-06	0.490196	0.00205913	0.372249	0.773965	0.322167	0.071177	0.371094	0.347022	0.253146	1	0.203064	1	-0.117947	1	-0.16803	1	-0.0500828	-0.347947	FALSE	0	0	TRUE	HYPO	0	FALSE	0	0	FALSE	HYPER	0
									ADA	1	0.0996806	1.16491e-05	0.299279	3.05596e-07	0.38489	1	0.102585	0.177829	0.199598	0.0149978	0.285209	1	0.00290478	1	0.0856109	1	-0.196694	0.397407	-0.282304	-0.347852	FALSE	HYPER	0	FALSE	HYPO	0	FALSE	0	0	FALSE	0	0
									CD44	1	-0.0736185	0.0905686	0.193811	0.0435566	0.239424	1	0.150704	0.204506	0.267429	0.0762302	0.313043	1	0.224323	1	0.0456134	1	-0.0431065	1	-0.0887199	-0.347478	TRUE	HYPER	0	TRUE	0	0	FALSE	HYPO	0	FALSE	0	0
									KLHDC9	1	-0.04194	0.0176906	-0.180491	0.0709629	-0.164769	1	-0.0315363	0.630874	-0.138551	0.742066	-0.122829	1	0.0104037	1	0.0157224	1	0.148955	1	0.133233	-0.347011	FALSE	0	0	TRUE	HYPER	HYPER	FALSE	0	0	TRUE	HYPO	0
									DGAT2	1	0.0201043	0.000181673	0.244339	0.0151255	0.1863	1	0.00542542	0.0750002	0.224235	0.262965	0.166195	1	-0.0146789	1	-0.0580395	1	-0.238914	0.835715	-0.180874	-0.3465	FALSE	0	0	TRUE	HYPO	0	FALSE	0	0	FALSE	HYPER	0
									DZIP1L	0.686432	0.194406	0.00108294	0.283537	0.0463953	0.211117	1	0.171273	1	0.089131	1	0.0167113	1	-0.0231325	1	-0.0724197	1	-0.112263	1	-0.0398438	-0.346404	FALSE	0	0	TRUE	HYPO	0	FALSE	0	0	FALSE	HYPER	0
									FER1L3	1	-0.0472077	0.00341484	-0.281653	0.110015	-0.199959	1	-0.100703	0.306967	-0.234445	0.795646	-0.152752	1	-0.0534948	1	0.0816938	1	0.180951	1	0.0992569	-0.346366	FALSE	0	0	TRUE	HYPER	HYPER	FALSE	0	0	TRUE	HYPO	0
									ROPN1B	0.131302	0.243591	0.000491536	0.24503	0.000523943	0.26789	0.478399	0.255796	1	0.00143857	1	0.0242992	1	0.0122049	1	0.0228607	1	0.0107663	1	-0.0120944	-0.346313	FALSE	HYPER	0	TRUE	HYPO	0	FALSE	0	0	FALSE	0	0
									IGSF3	1	-0.003116	0.0934546	-0.119528	1	-0.000818725	0.875324	-0.165147	0.624177	-0.116412	1	0.00229727	1	-0.162031	0.628687	0.118709	1	-0.0456195	0.837855	-0.164329	-0.346123	FALSE	0	0	FALSE	HYPER	0	FALSE	0	0	FALSE	0	0
									INPP1	1	0.0444512	0.0108083	0.202713	0.00374394	0.248329	1	-0.000974083	0.529489	0.158262	0.200968	0.203877	1	-0.0454253	1	0.0456154	1	-0.203687	0.5981	-0.249303	-0.346115	FALSE	HYPER	0	TRUE	HYPO	HYPER	FALSE	0	0	FALSE	0	0
									CAMK2D	1	0.0317307	0.0037951	0.362665	0.00191945	0.422426	1	0.259086	0.224404	0.330934	0.080617	0.390696	1	0.227355	1	0.0597613	1	-0.10358	1	-0.163341	-0.346061	FALSE	HYPER	0	TRUE	HYPO	0	FALSE	0	0	FALSE	0	0
									PAPPA	0.270998	0.393292	0.00921874	0.35643	4.75826e-05	0.579216	1	0.157173	1	-0.0368617	0.928781	0.185924	1	-0.236119	0.940659	0.222785	1	-0.199257	0.618301	-0.422042	-0.345885	FALSE	HYPER	0	TRUE	HYPO	HYPER	FALSE	0	0	FALSE	0	0
									THBS1	1	-0.0175506	3.25315e-05	-0.337564	3.63457e-06	-0.41244	1	-0.190907	0.0313478	-0.320014	0.00381574	-0.394889	1	-0.173356	1	-0.0748757	1	0.146658	0.873982	0.221533	-0.345504	FALSE	HYPO	0	FALSE	HYPER	0	FALSE	0	0	FALSE	0	0
									COL2A1	1	0.212293	0.0311175	0.296759	0.0136757	0.362156	1	0.164734	1	0.084466	1	0.149863	1	-0.0475588	1	0.0653974	1	-0.132025	1	-0.197422	-0.344632	FALSE	HYPER	0	TRUE	HYPO	HYPO	FALSE	0	0	FALSE	0	0
									IRF1	1	-0.0996495	0.0970607	0.24533	0.0022187	0.423852	1	0.104005	0.201458	0.34498	0.0118849	0.523502	1	0.203655	1	0.178522	1	-0.141325	0.932591	-0.319847	-0.344372	TRUE	HYPER	0	FALSE	0	0	FALSE	HYPO	0	FALSE	0	0
									PANK3	0.780384	-0.116399	4.19237e-05	-0.220689	4.59001e-06	-0.27049	0.423522	-0.204726	0.646184	-0.104289	0.160162	-0.154091	1	-0.0883262	1	-0.0498015	1	0.015963	1	0.0657644	-0.34433	FALSE	HYPO	0	TRUE	HYPER	HYPER	FALSE	0	0	FALSE	0	0
									FUT8	1	-0.0588993	0.000226352	-0.169117	0.00831533	-0.13959	0.747629	-0.140873	0.357279	-0.110218	0.716638	-0.0806904	1	-0.0819734	1	0.0295275	1	0.0282445	1	-0.00128302	-0.343638	FALSE	0	0	TRUE	HYPER	HYPER	FALSE	0	0	FALSE	HYPO	0
									RNF10	0.353119	-0.282881	2.0447e-05	-0.425002	1.6871e-06	-0.523961	0.28188	-0.420304	0.981133	-0.142121	0.331411	-0.24108	1	-0.137423	1	-0.0989598	1	0.00469778	1	0.103658	-0.34359	FALSE	HYPO	0	TRUE	HYPER	HYPER	FALSE	0	0	FALSE	0	0
									DCUN1D2	1	-0.128993	0.000824723	-0.293415	0.00444884	-0.280951	1	-0.13881	0.663277	-0.164422	0.721285	-0.151958	1	-0.00981704	1	0.0124639	1	0.154605	1	0.142141	-0.343497	FALSE	0	0	TRUE	HYPER	0	FALSE	0	0	FALSE	HYPO	0
									EVL	0.622391	-0.26273	0.0106479	-0.298886	0.947729	-0.0778685	1	-0.138597	1	-0.0361556	0.778596	0.184862	1	0.124134	0.6326	0.221018	1	0.160289	1	-0.0607285	-0.343165	FALSE	0	0	TRUE	HYPER	0	FALSE	0	0	TRUE	HYPO	0
									TFAP2A	1	-0.185494	0.0095655	-0.357937	0.0169837	-0.369771	1	-0.0586543	1	-0.172443	0.94286	-0.184277	1	0.12684	1	-0.0118343	1	0.299283	1	0.311117	-0.342505	FALSE	HYPO	0	TRUE	HYPER	0	FALSE	0	0	FALSE	0	0
									KIAA0999	1	0.126375	0.0486089	-0.188323	0.429642	-0.126939	1	-0.167905	0.0439659	-0.314699	0.122197	-0.253315	1	-0.294281	1	0.061384	1	0.0204178	1	-0.0409662	-0.341974	FALSE	0	0	FALSE	0	0	FALSE	HYPER	0	TRUE	HYPO	HYPER
									FMNL3	1	0.177603	0.00296936	0.32611	0.00190704	0.371809	1	0.0125924	0.991546	0.148507	0.675263	0.194206	1	-0.165011	1	0.045699	1	-0.313518	0.571098	-0.359217	-0.34174	FALSE	HYPER	0	TRUE	HYPO	0	FALSE	0	0	FALSE	0	0
									ZNF395	1	0.0143821	0.000387566	-0.315308	0.551321	-0.117841	0.577884	-0.303916	0.0435243	-0.32969	0.887172	-0.132223	1	-0.318298	0.410798	0.197467	1	0.011392	1	-0.186075	-0.341495	FALSE	0	0	FALSE	0	0	FALSE	HYPER	0	TRUE	HYPO	HYPER
									LOC93349	0.928777	-0.197108	0.439001	0.138013	0.199787	0.192716	1	0.0446802	0.095471	0.335121	0.0273309	0.389823	1	0.241788	1	0.0547026	1	-0.0933328	1	-0.148035	-0.34148	TRUE	HYPER	0	FALSE	0	0	TRUE	HYPO	HYPO	FALSE	0	0
									SNX25	1	-0.159598	0.000393684	-0.361974	0.00151878	-0.360876	0.235348	-0.441727	0.597261	-0.202376	0.570491	-0.201277	1	-0.282128	1	0.00109869	1	-0.0797524	1	-0.0808511	-0.340877	FALSE	0	0	TRUE	HYPER	0	FALSE	0	0	FALSE	0	0
									ZNF148	1	-0.0282002	0.00956562	-0.249818	0.000353996	-0.361468	1	-0.147063	0.353653	-0.221618	0.0384269	-0.333267	1	-0.118863	1	-0.11165	1	0.102755	1	0.214405	-0.340674	FALSE	HYPO	0	FALSE	HYPER	0	FALSE	0	0	FALSE	0	0
									HAS2	0.128645	0.505808	2.01081e-07	0.745492	4.99131e-10	0.997393	0.891272	0.395382	0.829125	0.239684	0.0578711	0.491585	1	-0.110427	0.902356	0.251901	1	-0.35011	0.386284	-0.602012	-0.340528	FALSE	HYPER	0	TRUE	HYPO	0	FALSE	0	0	FALSE	0	0
									OVOL1	0.109952	-0.354748	7.05238e-06	-0.439311	3.14454e-05	-0.449229	0.731391	-0.308409	1	-0.0845627	1	-0.0944804	1	0.0463387	1	-0.00991775	1	0.130901	1	0.140819	-0.340524	FALSE	HYPO	0	TRUE	HYPER	0	FALSE	0	0	FALSE	0	0
									GALT	1	0.0544778	2.11999e-06	0.331876	0.0983409	0.154821	0.958893	0.183864	0.0298514	0.277398	0.933107	0.100343	1	0.129387	0.247536	-0.177055	1	-0.148011	1	0.0290438	-0.340444	FALSE	0	0	FALSE	HYPO	0	FALSE	0	0	TRUE	HYPER	0
									HSPC111	1	0.0415866	0.0117323	0.162309	0.0300507	0.159931	1	0.0956009	0.606541	0.120723	0.5984	0.118344	1	0.0540143	1	-0.00237813	1	-0.0667083	1	-0.0643301	-0.340333	FALSE	0	0	TRUE	HYPO	HYPO	FALSE	0	0	FALSE	HYPER	0
									DHX9	0.363744	0.308139	3.33619e-09	0.658626	1.591e-07	0.632084	0.160217	0.528088	0.112893	0.350487	0.137601	0.323945	1	0.219949	1	-0.0265418	1	-0.130538	1	-0.103996	-0.340244	FALSE	0	0	TRUE	HYPO	HYPO	FALSE	0	0	FALSE	HYPER	0
									CHIC2	1	0.127138	0.00199984	0.249198	0.00319509	0.262935	1	0.107434	0.906636	0.12206	0.742087	0.135797	1	-0.0197035	1	0.0137368	1	-0.141764	1	-0.155501	-0.340208	FALSE	HYPER	0	TRUE	HYPO	HYPER	FALSE	0	0	FALSE	0	0
									C11orf35	1	-0.180924	0.00918196	-0.322621	0.160725	-0.234766	1	-0.038876	1	-0.141698	1	-0.0538418	1	0.142048	1	0.0878558	1	0.283745	1	0.19589	-0.340162	FALSE	0	0	TRUE	HYPER	0	FALSE	0	0	TRUE	HYPO	0
									PGM1	1	0.0884326	0.00146572	0.226095	0.00727004	0.215517	1	0.162559	0.610564	0.137662	0.674984	0.127085	1	0.0741264	1	-0.0105774	1	-0.0635356	1	-0.0529582	-0.33967	FALSE	0	0	TRUE	HYPO	0	FALSE	0	0	FALSE	HYPER	0
									SEMA3B	0.871115	-0.230239	0.000352545	-0.410002	0.001748	-0.401184	1	-0.100298	0.890946	-0.179763	0.887172	-0.170945	1	0.129941	1	0.008818	1	0.309704	0.906424	0.300886	-0.339445	FALSE	0	0	TRUE	HYPER	HYPER	FALSE	0	0	FALSE	HYPO	0
									LIX1L	0.0993114	0.347693	7.1235e-05	0.374336	1.06836e-05	0.454449	1	0.227204	1	0.0266434	1	0.106757	1	-0.120489	1	0.0801131	1	-0.147132	1	-0.227245	-0.339439	FALSE	HYPER	0	TRUE	HYPO	0	FALSE	0	0	FALSE	0	0
									RARRES3	0.543364	-0.297097	0.783806	-0.111865	0.824193	0.113809	1	-0.24306	0.908393	0.185231	0.0555091	0.410906	1	0.0540366	0.751768	0.225674	1	-0.131195	0.746991	-0.356869	-0.339217	FALSE	HYPER	0	FALSE	0	0	FALSE	HYPO	0	FALSE	0	0
									HSPB1	0.685645	-0.162124	0.0033074	-0.21578	0.000584287	-0.271201	0.899275	-0.194165	1	-0.053656	0.864612	-0.109077	1	-0.0320405	1	-0.0554208	1	0.0216155	1	0.0770363	-0.338815	FALSE	HYPO	0	TRUE	HYPER	0	FALSE	0	0	FALSE	0	0
									MYO6	1	0.00909146	0.00300594	-0.340992	0.00310152	-0.373717	1	-0.204294	0.117146	-0.350084	0.0558783	-0.382809	1	-0.213385	1	-0.0327247	1	0.136698	1	0.169423	-0.338634	FALSE	HYPO	0	TRUE	0	0	FALSE	HYPER	0	FALSE	0	0
									TINAGL1	1	0.081004	0.0284687	0.188458	9.86149e-05	0.336094	1	0.12947	1	0.107454	0.0786467	0.25509	1	0.0484655	0.766612	0.147636	1	-0.0589888	0.916936	-0.206625	-0.338473	FALSE	HYPER	0	TRUE	HYPO	0	FALSE	0	0	FALSE	0	0
									ZNF321	0.107763	-0.226292	0.119935	-0.120131	0.843425	0.0574795	1	-0.111374	0.806197	0.106161	0.0072539	0.283772	1	0.114919	0.133241	0.177611	1	0.00875724	0.874727	-0.168853	-0.338185	TRUE	HYPER	0	FALSE	0	0	TRUE	HYPO	0	FALSE	0	0
									ANKS6	0.529201	0.202573	1.04735e-05	0.352706	6.5088e-05	0.353212	1	0.200809	0.691368	0.150132	0.649483	0.150638	1	-0.00176388	1	0.000506026	1	-0.151896	1	-0.152402	-0.337824	FALSE	0	0	TRUE	HYPO	0	FALSE	0	0	FALSE	HYPER	0
									SOCS1	1	0.0577084	0.00177459	0.252365	4.15973e-05	0.353603	1	0.165364	0.330374	0.194656	0.0320356	0.295894	1	0.107656	1	0.101238	1	-0.0870008	1	-0.188239	-0.337732	FALSE	HYPER	0	FALSE	HYPO	0	FALSE	0	0	FALSE	0	0
									PLK2	1	-0.110667	0.00513458	-0.319951	0.764358	-0.114928	1	-0.0397764	0.659683	-0.209285	1	-0.00426141	1	0.0708904	0.776609	0.205023	1	0.280175	1	0.0751519	-0.337539	FALSE	0	0	TRUE	HYPER	HYPER	FALSE	0	0	TRUE	HYPO	HYPER
									CD226	1	-0.0869502	0.0763182	0.182297	0.071152	0.202953	1	0.128009	0.131384	0.269247	0.0699755	0.289903	1	0.21496	1	0.0206564	1	-0.0542871	1	-0.0749435	-0.337387	FALSE	HYPER	0	FALSE	0	0	FALSE	HYPO	0	FALSE	0	0
									HIST1H2AG	1	0.262888	7.03394e-06	0.897956	0.000607505	0.766474	0.158212	0.979795	0.116117	0.635068	0.283092	0.503586	1	0.716908	1	-0.131482	1	0.0818398	1	0.213322	-0.337337	FALSE	0	0	TRUE	HYPO	HYPO	FALSE	0	0	FALSE	0	0
									RNASE6	1	-0.0927669	0.0977097	0.136423	0.00275842	0.231705	1	0.072696	0.0871736	0.22919	0.00442257	0.324472	1	0.165463	1	0.0952815	1	-0.0637271	1	-0.159009	-0.337224	TRUE	HYPER	HYPER	FALSE	0	0	FALSE	HYPO	0	FALSE	0	0
									GPX7	0.370134	0.212575	0.00105072	0.255237	8.23416e-06	0.372493	0.846515	0.218708	1	0.0426617	0.501829	0.159918	1	0.00613303	1	0.117256	1	-0.0365287	1	-0.153785	-0.337059	FALSE	HYPER	0	TRUE	HYPO	0	FALSE	0	0	FALSE	0	0
									MRCL3	1	0.0961037	0.0606321	0.262783	0.00361004	0.40268	1	0.276187	1	0.166679	0.27586	0.306576	1	0.180083	1	0.139897	1	0.0134042	1	-0.126493	-0.336918	TRUE	HYPER	0	TRUE	HYPO	0	FALSE	0	0	FALSE	0	0
x									S100A4	1	-0.0435929	0.00355473	0.269654	0.0112245	0.264142	1	0.0351365	0.0664668	0.313247	0.0553945	0.307735	1	0.0787294	1	-0.00551228	1	-0.234518	0.940822	-0.229006	-0.336643	FALSE	0	0	TRUE	0	0	FALSE	HYPO	0	FALSE	HYPER	0
									CCDC86	0.682375	0.190734	0.00808299	0.23135	0.00785458	0.255623	0.976518	0.214957	1	0.0406167	1	0.0648898	1	0.0242232	1	0.0242731	1	-0.0163935	1	-0.0406665	-0.336472	FALSE	HYPER	0	TRUE	HYPO	0	FALSE	0	0	FALSE	0	0
									SPOPL	1	-0.0976238	0.00549558	-0.262016	0.0701653	-0.210316	1	-0.0546293	0.721081	-0.164392	1	-0.112692	1	0.0429945	1	0.0516996	1	0.207386	1	0.155687	-0.335972	FALSE	0	0	TRUE	HYPER	HYPER	FALSE	0	0	TRUE	HYPO	0
									MFSD2	1	0.122451	1.41941e-07	0.383575	1.09106e-08	0.460125	1	0.169972	0.0596525	0.261124	0.00605905	0.337674	1	0.0475213	1	0.0765503	1	-0.213603	0.415748	-0.290153	-0.335827	FALSE	HYPER	0	FALSE	HYPO	0	FALSE	0	0	FALSE	0	0
									SLC43A3	0.674226	0.18567	7.96099e-09	0.468396	6.26645e-05	0.353645	0.812573	0.235674	0.0664668	0.282726	0.50458	0.167974	1	0.0500036	1	-0.114752	1	-0.232722	1	-0.117971	-0.335673	FALSE	0	0	TRUE	HYPO	0	FALSE	0	0	FALSE	HYPER	0
									SHC3	1	0.0980395	0.000109734	0.287147	0.000572047	0.284198	0.210273	0.334769	0.296556	0.189108	0.282321	0.186159	1	0.236729	1	-0.00294903	1	0.0476216	1	0.0505706	-0.335485	FALSE	0	0	TRUE	HYPO	0	FALSE	0	0	FALSE	0	0
x									IFNGR2	1	0.210739	0.206007	0.286472	0.0123359	0.488954	1	0.0217838	1	0.0757332	0.781467	0.278216	1	-0.188955	1	0.202482	1	-0.264688	0.829077	-0.46717	-0.33505	TRUE	HYPER	HYPER	TRUE	HYPO	0	FALSE	0	0	FALSE	0	0
									GTPBP4	1	0.158674	8.49206e-05	0.417166	0.0380011	0.271098	1	0.188187	0.351144	0.258493	1	0.112424	1	0.0295133	1	-0.146068	1	-0.228979	1	-0.0829112	-0.334988	FALSE	0	0	TRUE	HYPO	0	FALSE	0	0	FALSE	HYPER	0
									KIAA1598	0.866231	-0.159106	0.000478792	-0.276581	1.33663e-05	-0.37307	1	-0.191896	0.93589	-0.117475	0.193086	-0.213964	1	-0.0327904	1	-0.0964894	1	0.0846841	1	0.181173	-0.334895	FALSE	HYPO	0	TRUE	HYPER	HYPO	FALSE	0	0	FALSE	0	0
									MAD2L1	1	0.026223	0.0125895	0.237113	0.751441	0.0956163	0.901572	0.244042	0.387122	0.21089	1	0.0693933	1	0.217819	1	-0.141497	1	0.00692873	1	0.148425	-0.334875	FALSE	0	0	TRUE	HYPO	0	FALSE	0	0	TRUE	0	0
									SPRY1	1	-0.16785	0.677477	0.116863	0.114921	0.232031	1	-0.184845	0.266405	0.284713	0.0363661	0.399881	1	-0.0169948	1	0.115168	1	-0.301708	0.44741	-0.416876	-0.334353	TRUE	HYPER	HYPER	FALSE	0	0	TRUE	0	0	FALSE	0	0
									HSPA4	1	-0.113629	0.00703661	-0.241341	0.0690918	-0.199285	1	-0.157662	0.937154	-0.127712	1	-0.0856555	1	-0.0440325	1	0.0420563	1	0.0836792	1	0.0416229	-0.334035	FALSE	0	0	TRUE	HYPER	0	FALSE	0	0	TRUE	HYPO	0
									RABEP2	1	0.00982018	0.0501674	-0.178903	0.0304154	-0.211338	1	-0.120233	0.39212	-0.188723	0.188594	-0.221158	1	-0.130053	1	-0.032435	1	0.0586703	1	0.0911052	-0.333987	TRUE	HYPO	HYPO	TRUE	0	0	FALSE	HYPER	0	FALSE	0	0
									TMBIM1	1	0.194631	0.000862518	0.365568	0.00180705	0.379536	1	0.0897988	0.888404	0.170937	0.751739	0.184905	1	-0.104832	1	0.0139682	1	-0.275769	0.886702	-0.289738	-0.33374	FALSE	HYPER	0	TRUE	HYPO	HYPER	FALSE	0	0	FALSE	0	0
									NAGS	0.597963	0.319629	0.182576	0.233745	0.873782	0.114723	0.30412	0.545155	1	-0.0858838	0.85726	-0.204906	1	0.225526	1	-0.119022	1	0.31141	0.618301	0.430432	-0.333649	FALSE	0	0	FALSE	HYPO	0	FALSE	0	0	FALSE	0	0
									RPS27A	0.154475	0.263445	1.632e-08	0.440051	3.14663e-05	0.353722	0.188163	0.361974	0.42562	0.176606	1	0.0902772	1	0.0985288	1	-0.0863288	1	-0.0780772	1	0.00825161	-0.333303	FALSE	0	0	TRUE	HYPO	HYPO	FALSE	0	0	FALSE	HYPER	0
									MGC16169	0.176366	-0.250442	0.00331566	-0.229843	0.000851545	-0.281662	1	-0.115455	1	0.0205991	1	-0.0312196	1	0.134987	1	-0.0518187	1	0.114388	1	0.166207	-0.333247	FALSE	HYPO	0	TRUE	HYPER	0	FALSE	0	0	FALSE	0	0
									RAPGEF3	0.261201	-0.289459	0.00116407	-0.313395	0.70178	-0.107608	1	-0.224873	1	-0.0239364	0.61603	0.181851	1	0.064586	0.469454	0.205788	1	0.0885224	1	-0.117265	-0.333182	FALSE	0	0	TRUE	HYPER	HYPER	FALSE	0	0	TRUE	HYPO	0
									IQCE	0.971972	-0.202453	0.0311175	-0.25479	0.000271583	-0.432638	0.773965	-0.323171	1	-0.0523376	0.468652	-0.230185	1	-0.120719	1	-0.177848	1	-0.0683811	1	0.109467	-0.332978	FALSE	HYPO	0	TRUE	HYPER	0	FALSE	0	0	FALSE	0	0
									ZNF468	0.251035	-0.159392	0.00592639	-0.148438	0.93561	-0.0379546	0.682055	-0.166695	1	0.0109535	0.352657	0.121437	1	-0.0073026	0.505146	0.110484	1	-0.0182561	0.972842	-0.12874	-0.33268	FALSE	0	0	TRUE	HYPER	0	FALSE	HYPO	0	TRUE	0	0
									CRLF3	0.240103	0.295379	2.53294e-09	0.570355	1.04493e-07	0.550256	0.839307	0.272046	0.175988	0.274976	0.205826	0.254877	1	-0.0233337	1	-0.0200986	1	-0.298309	0.768792	-0.278211	-0.332554	FALSE	0	0	TRUE	HYPO	HYPO	FALSE	0	0	FALSE	HYPER	0
									TNRC6A	1	-0.0373502	0.0284038	-0.178142	0.0575958	-0.178066	1	-0.171168	0.667694	-0.140792	0.631588	-0.140716	1	-0.133818	1	7.58767e-05	1	0.00697442	1	0.00689855	-0.33242	FALSE	0	0	TRUE	HYPER	0	FALSE	0	0	TRUE	HYPO	0
									TGIF2	1	0.0216097	0.0677253	0.147924	0.396519	0.10803	1	-0.0919047	0.723957	0.126314	1	0.0864199	1	-0.113514	1	-0.039894	1	-0.239828	0.799655	-0.199934	-0.332416	FALSE	0	0	FALSE	0	0	FALSE	0	0	FALSE	HYPER	0
									C1orf34	0.0615441	-0.395753	1.28942e-06	-0.479233	1.44536e-05	-0.473093	0.941695	-0.264283	1	-0.0834803	1	-0.0773405	1	0.13147	1	0.00613987	1	0.21495	1	0.208811	-0.332318	FALSE	0	0	TRUE	HYPER	0	FALSE	0	0	FALSE	HYPO	0
									RGS2	1	0.240064	1.91646e-07	0.696936	1.5733e-07	0.770947	1	0.30868	0.079762	0.456872	0.0218246	0.530884	1	0.0686168	1	0.0740113	1	-0.388256	0.546201	-0.462267	-0.332253	FALSE	HYPER	0	FALSE	HYPO	0	FALSE	0	0	FALSE	0	0
									IGFBP4	1	-0.0327895	0.00277618	-0.40116	0.00134785	-0.467593	0.983607	-0.332794	0.195604	-0.36837	0.0662243	-0.434804	1	-0.300005	1	-0.0664333	1	0.0683658	1	0.134799	-0.332225	FALSE	HYPO	0	TRUE	HYPER	HYPER	FALSE	0	0	FALSE	0	0
									PPID	1	-0.0801621	0.264023	-0.095354	0.00204576	-0.20614	0.905582	-0.160832	1	-0.0151918	0.478999	-0.125978	1	-0.0806697	0.776609	-0.110786	1	-0.0654779	1	0.0453084	-0.332166	TRUE	HYPO	HYPO	TRUE	HYPER	0	FALSE	0	0	FALSE	0	0
									UBXD3	1	-0.0217767	0.0254253	-0.18416	0.0426203	-0.189756	1	-0.153968	0.501837	-0.162384	0.422196	-0.16798	1	-0.132191	1	-0.00559625	1	0.0301921	1	0.0357884	-0.332152	FALSE	0	0	TRUE	HYPER	HYPER	FALSE	0	0	FALSE	HYPO	0
									TMEM79	1	0.135452	0.12088	-0.217993	0.473537	-0.163799	1	0.213728	0.122986	-0.353445	0.229165	-0.299251	1	0.078276	1	0.0541934	1	0.431721	0.593905	0.377527	-0.33213	FALSE	0	0	FALSE	0	0	FALSE	0	0	FALSE	HYPO	0
									HMG2L1	0.249191	0.308532	1	0.00772183	0.648891	-0.120373	1	0.0792711	0.143604	-0.30081	0.0113045	-0.428905	1	-0.229261	1	-0.128095	1	0.0715493	1	0.199644	-0.331979	TRUE	HYPO	HYPER	FALSE	0	0	TRUE	HYPER	HYPER	FALSE	0	0
									MICAL1	0.476417	0.241595	0.0168715	0.23923	0.00117667	0.340103	1	0.134543	1	-0.00236473	1	0.0985082	1	-0.107052	1	0.100873	1	-0.104687	1	-0.20556	-0.331811	FALSE	HYPER	0	TRUE	HYPO	0	FALSE	0	0	FALSE	0	0
									DGKD	0.730628	-0.134398	0.00650385	-0.17244	0.65538	-0.0725992	1	-0.116658	1	-0.0380424	1	0.0617988	1	0.0177405	1	0.0998412	1	0.0557829	1	-0.0440583	-0.331659	FALSE	0	0	TRUE	HYPER	0	FALSE	0	0	TRUE	HYPO	0
									FOXN2	1	-0.0512044	0.00112369	0.24693	0.0371746	0.190279	1	0.0442032	0.0266483	0.298134	0.0789681	0.241483	1	0.0954076	1	-0.0566508	1	-0.202727	1	-0.146076	-0.331607	FALSE	0	0	FALSE	0	0	FALSE	HYPO	0	FALSE	HYPER	0
									ICA1	1	-0.0469822	0.0328411	-0.181394	0.0212252	-0.211593	1	-0.0153531	0.776239	-0.134412	0.471548	-0.16461	1	0.0316291	1	-0.0301989	1	0.166041	0.949545	0.196239	-0.331032	FALSE	HYPO	0	TRUE	HYPER	HYPO	FALSE	0	0	FALSE	0	0
									GPT2	0.10781	0.296027	0.0119859	0.217797	0.221702	0.151481	0.884313	0.225466	1	-0.0782303	0.716638	-0.144547	1	-0.0705611	1	-0.0663162	1	0.00766928	1	0.0739855	-0.33067	FALSE	0	0	TRUE	HYPO	HYPER	FALSE	HYPER	0	TRUE	0	0
									WWP1	1	-0.0308394	0.0254226	-0.272293	0.0271581	-0.297802	1	0.0899177	0.49573	-0.241454	0.337598	-0.266963	1	0.120757	1	-0.0255089	1	0.362211	0.543289	0.38772	-0.330656	FALSE	HYPO	0	TRUE	0	0	FALSE	0	0	FALSE	0	0
									TYROBP	0.282041	-0.238911	1	-0.0115832	0.822187	0.0763403	1	0.0104267	0.188386	0.227328	0.0218143	0.315251	1	0.249338	1	0.0879235	1	0.0220099	1	-0.0659136	-0.330189	TRUE	HYPER	HYPER	FALSE	0	0	TRUE	HYPO	0	FALSE	0	0
									GALNT2	1	0.134413	0.0370874	0.280548	0.0110053	0.358824	1	0.184294	1	0.146135	0.659779	0.224411	1	0.0498813	1	0.0782755	1	-0.0962538	1	-0.174529	-0.330141	FALSE	HYPER	0	TRUE	HYPO	0	FALSE	0	0	FALSE	0	0
									ETV5	1	0.164803	0.000500639	0.51519	0.00186302	0.513478	1	0.251318	0.367088	0.350387	0.340358	0.348675	1	0.0865148	1	-0.00171201	1	-0.263872	1	-0.26216	-0.330134	FALSE	0	0	TRUE	HYPO	0	FALSE	0	0	FALSE	HYPER	0
									SLAMF8	1	-0.0318884	0.00372908	0.264829	0.133988	0.182559	1	0.123049	0.0858613	0.296718	0.313855	0.214448	1	0.154937	1	-0.08227	1	-0.14178	1	-0.0595104	-0.329646	FALSE	0	0	TRUE	0	0	FALSE	HYPO	0	TRUE	HYPER	0
									RASA1	1	-0.0344406	0.0115259	-0.16212	0.122595	-0.127798	1	-0.098186	0.527556	-0.12768	0.861374	-0.093357	1	-0.0637455	1	0.0343229	1	0.0639344	1	0.0296115	-0.32962	FALSE	0	0	TRUE	HYPER	0	FALSE	0	0	TRUE	HYPO	HYPO
									SSB	0.459559	0.185255	0.0103491	0.192205	0.247166	0.12773	1	0.0935169	1	0.00695052	1	-0.0575251	1	-0.091738	1	-0.0644756	1	-0.0986885	1	-0.0342129	-0.329138	FALSE	0	0	TRUE	HYPO	0	FALSE	0	0	TRUE	HYPER	0
									FOXQ1	0.277091	0.383857	9.04704e-07	0.621479	3.48049e-06	0.644452	0.34454	0.507145	0.689814	0.237622	0.531676	0.260595	1	0.123288	1	0.0229729	1	-0.114333	1	-0.137306	-0.328855	FALSE	HYPER	0	TRUE	HYPO	HYPO	FALSE	0	0	FALSE	0	0
									RASAL1	1	-0.106165	0.419811	0.120875	0.0308698	0.228716	1	0.118344	0.27358	0.22704	0.0275976	0.334881	1	0.224509	1	0.10784	1	-0.00253125	1	-0.110372	-0.328649	TRUE	HYPER	HYPER	FALSE	0	0	FALSE	HYPO	0	FALSE	0	0
									PLK1	0.948494	0.118937	5.46454e-06	0.280293	0.0637037	0.146551	0.749707	0.190883	0.273901	0.161356	1	0.0276143	1	0.0719464	0.488137	-0.133742	1	-0.08941	1	0.0443321	-0.32847	FALSE	0	0	TRUE	HYPO	HYPO	FALSE	0	0	TRUE	HYPER	0
									MLC1	1	0.181323	0.00018691	0.40451	0.000376674	0.424985	0.992642	0.27448	0.551298	0.223187	0.402027	0.243662	1	0.0931573	1	0.0204749	1	-0.13003	1	-0.150505	-0.328204	FALSE	HYPER	0	TRUE	HYPO	HYPO	FALSE	0	0	FALSE	0	0
									CCDC102A	1	0.0568764	0.00147693	0.225125	0.000593962	0.264351	1	-0.0118151	0.351387	0.168249	0.124155	0.207475	1	-0.0686914	1	0.0392261	1	-0.23694	0.413219	-0.276167	-0.32772	FALSE	HYPER	0	TRUE	0	0	FALSE	0	0	FALSE	0	0
									BICD1	0.546306	0.245511	0.00173179	0.317117	0.272776	0.173144	1	0.189913	1	0.0716063	1	-0.0723663	1	-0.0555977	1	-0.143973	1	-0.127204	1	0.0167686	-0.327684	FALSE	0	0	TRUE	HYPO	0	FALSE	0	0	TRUE	HYPER	HYPER
									TIMM8A	1	0.0719187	0.00601734	0.197426	0.64701	0.0832472	1	0.148744	0.716946	0.125508	1	0.0113285	1	0.0768251	1	-0.114179	1	-0.0486827	1	0.0654965	-0.327434	FALSE	0	0	TRUE	HYPO	0	FALSE	0	0	TRUE	HYPER	0
									PRTFDC1	0.154475	0.251039	5.13635e-05	0.297929	0.00079327	0.276427	1	0.164995	1	0.04689	1	0.0253874	1	-0.086045	1	-0.0215026	1	-0.132935	1	-0.111432	-0.327328	FALSE	0	0	TRUE	HYPO	0	FALSE	0	0	FALSE	HYPER	0
									DUSP6	1	0.0127976	0.983497	-0.100391	0.0686412	0.443157	1	-0.113584	1	-0.113188	0.397092	0.430359	1	-0.126382	0.133241	0.543548	1	-0.0131932	0.777225	-0.556741	-0.32732	FALSE	HYPER	0	FALSE	0	0	FALSE	0	0	FALSE	0	0
									RASSF4	1	-0.0291687	0.0354038	0.179878	0.00831533	0.235742	1	0.163639	0.233051	0.209046	0.0561088	0.264911	1	0.192807	1	0.0558644	1	-0.016239	1	-0.0721034	-0.326804	FALSE	HYPER	0	TRUE	0	0	FALSE	HYPO	0	FALSE	0	0
									HCST	1	0.0287952	0.00132943	0.254538	0.00394004	0.255289	1	0.0655741	0.176544	0.225743	0.143407	0.226494	1	0.0367789	1	0.000751058	1	-0.188964	1	-0.189715	-0.32646	FALSE	0	0	TRUE	HYPO	HYPO	FALSE	0	0	FALSE	HYPER	0
									C1orf198	0.599603	0.227244	0.00583696	0.271821	0.019938	0.261306	0.966841	0.245015	1	0.0445775	1	0.0340627	1	0.0177711	1	-0.0105148	1	-0.0268063	1	-0.0162915	-0.326156	FALSE	0	0	TRUE	HYPO	0	FALSE	0	0	FALSE	HYPER	0
									EPS8L2	1	-0.0584848	4.19237e-05	-0.307689	3.35038e-06	-0.382337	1	-0.170363	0.095471	-0.249204	0.0113844	-0.323852	1	-0.111878	1	-0.0746482	1	0.137326	0.829077	0.211974	-0.326062	FALSE	HYPO	0	FALSE	HYPER	0	FALSE	0	0	FALSE	0	0
									HHAT	1	-0.0912188	0.0543807	-0.213139	0.00976256	-0.291351	0.525999	-0.345598	1	-0.12192	0.520009	-0.200132	1	-0.254379	1	-0.078212	1	-0.132459	1	-0.0542466	-0.326051	TRUE	0	0	TRUE	HYPER	0	FALSE	0	0	FALSE	0	0
									LDHB	0.739856	0.220694	0.000125211	0.383508	0.000441936	0.389421	1	0.182437	0.855275	0.162815	0.768601	0.168728	1	-0.0382564	1	0.00591313	1	-0.201071	1	-0.206984	-0.325905	FALSE	HYPER	0	TRUE	HYPO	HYPO	FALSE	0	0	FALSE	0	0
									H1F0	1	-0.136547	0.0177957	-0.223344	0.00199855	-0.306314	1	-0.151383	1	-0.0867972	0.609607	-0.169767	1	-0.014836	1	-0.0829699	1	0.0719612	1	0.154931	-0.32584	FALSE	HYPO	0	TRUE	HYPER	HYPER	FALSE	0	0	FALSE	0	0
									CPAMD8	1	0.103696	0.0152146	0.199666	5.83664e-05	0.33982	1	0.0531064	1	0.0959701	0.110007	0.236124	1	-0.0505892	0.835051	0.140154	1	-0.146559	0.475647	-0.286713	-0.325502	FALSE	HYPER	0	TRUE	HYPO	0	FALSE	0	0	FALSE	0	0
									GSPT1	1	-0.0733938	0.0290491	-0.267764	0.008196	-0.342533	1	-0.20344	0.781663	-0.194371	0.329242	-0.269139	1	-0.130046	1	-0.0747686	1	0.0643248	1	0.139093	-0.325485	FALSE	HYPO	0	TRUE	HYPER	0	FALSE	0	0	FALSE	0	0
									ZNF26	0.529107	0.275037	2.164e-05	0.461523	0.513929	0.151816	0.666927	0.36205	0.802279	0.186486	1	-0.123221	1	0.0870123	0.133241	-0.309707	1	-0.0994734	1	0.210233	-0.325446	FALSE	0	0	TRUE	HYPO	HYPO	FALSE	0	0	TRUE	HYPER	0
									BAG4	1	0.0328631	0.520367	-0.134843	0.0003011	-0.427588	1	-0.0314141	0.899536	-0.167706	0.0112915	-0.460451	1	-0.0642773	0.153737	-0.292745	1	0.103429	0.484236	0.396174	-0.325388	TRUE	HYPO	HYPO	FALSE	0	0	FALSE	HYPER	0	FALSE	0	0
									TNFAIP8L2	1	-0.00748663	0.0343512	0.157542	0.0567521	0.161813	1	0.0233629	0.338351	0.165028	0.278355	0.1693	1	0.0308495	1	0.00427144	1	-0.134179	1	-0.13845	-0.325243	FALSE	HYPER	0	TRUE	HYPO	HYPO	FALSE	0	0	TRUE	0	0
									STAT4	1	0.115635	0.0165031	0.235256	0.0100909	0.27458	1	0.160093	1	0.119621	0.740957	0.158945	1	0.0444584	1	0.0393244	1	-0.0751627	1	-0.114487	-0.325056	FALSE	HYPER	0	TRUE	HYPO	0	FALSE	0	0	FALSE	0	0
									FBLIM1	1	-0.079436	0.966907	0.0347332	0.0176783	0.16471	1	0.0442517	0.633335	0.114169	0.0145505	0.244146	1	0.123688	0.430617	0.129977	1	0.00951853	1	-0.120459	-0.324726	TRUE	HYPER	HYPER	FALSE	0	0	FALSE	HYPO	0	FALSE	0	0
							X		SYK	1	0.0780048	0.00353255	0.236158	0.0329595	0.203108	0.609925	0.264655	0.581928	0.158153	0.824284	0.125103	1	0.18665	1	-0.0330498	1	0.028497	1	0.0615468	-0.324648	FALSE	0	0	TRUE	HYPO	HYPO	FALSE	0	0	FALSE	0	0
									UBE2F	0.488518	0.209645	0.000120275	0.313896	0.438527	0.121815	1	0.155094	1	0.104252	1	-0.0878296	1	-0.0545507	0.327553	-0.192081	1	-0.158802	1	0.0332789	-0.324545	FALSE	0	0	TRUE	HYPO	0	FALSE	0	0	TRUE	HYPER	HYPER
									MS4A1	0.879854	0.140516	0.000168152	0.263725	0.00110685	0.255532	1	0.0902808	0.763949	0.12321	0.795646	0.115017	1	-0.0502349	1	-0.00819284	1	-0.173444	1	-0.165252	-0.324535	FALSE	0	0	TRUE	HYPO	HYPER	FALSE	0	0	FALSE	HYPER	0
									GYPC	0.467077	0.361572	7.05115e-05	0.551352	0.000144132	0.581812	1	0.332311	1	0.18978	0.833072	0.220241	1	-0.029261	1	0.0304607	1	-0.219041	1	-0.249502	-0.324093	FALSE	HYPER	0	TRUE	HYPO	0	FALSE	0	0	FALSE	0	0
									CCDC72	1	0.089812	0.491327	-0.110837	0.0490733	-0.210215	0.773965	-0.256439	0.391447	-0.200649	0.0492885	-0.300027	1	-0.346251	1	-0.0993772	1	-0.145602	1	-0.0462247	-0.32409	TRUE	0	0	FALSE	0	0	FALSE	HYPER	0	FALSE	0	0
									LOC440087	0.659323	0.151447	1	-0.00122276	0.449516	-0.0963477	1	-0.0305421	0.393872	-0.152669	0.0294165	-0.247794	1	-0.181989	1	-0.0951249	1	-0.0293194	1	0.0658055	-0.324076	TRUE	HYPO	0	FALSE	0	0	TRUE	HYPER	0	FALSE	0	0
									SLC43A2	1	-0.00685466	0.00448912	0.265624	0.000193506	0.369637	1	0.103612	0.141339	0.272479	0.0141039	0.376492	1	0.110467	1	0.104013	1	-0.162012	0.759511	-0.266025	-0.324071	FALSE	HYPER	0	FALSE	HYPO	0	FALSE	0	0	FALSE	0	0
									AK3L1	1	-0.0679374	0.039515	0.168736	0.00149981	0.261929	1	0.0318197	0.10636	0.236674	0.00784745	0.329866	1	0.0997571	1	0.0931923	1	-0.136916	0.675723	-0.230109	-0.324045	FALSE	HYPER	0	FALSE	0	0	FALSE	HYPO	0	FALSE	0	0
									CDAN1	1	0.00676714	0.00507996	-0.175754	0.0107599	-0.178878	0.528996	-0.213951	0.141205	-0.182521	0.105832	-0.185645	1	-0.220718	1	-0.00312394	1	-0.0381972	1	-0.0350732	-0.323985	FALSE	0	0	TRUE	0	0	FALSE	HYPER	0	FALSE	0	0
									TMEM71	1	0.117376	0.000147236	0.367267	0.0699544	0.224843	1	0.222003	0.279821	0.249891	1	0.107467	1	0.104627	1	-0.142425	1	-0.145264	1	-0.00283991	-0.323712	FALSE	0	0	TRUE	HYPO	HYPO	FALSE	0	0	TRUE	HYPER	0
									TMEM121	1	-0.00233918	0.211457	-0.0893026	0.00243803	-0.179604	1	-0.0993597	0.831999	-0.0869634	0.0615253	-0.177265	1	-0.0970205	0.928849	-0.0903017	1	-0.0100571	1	0.0802446	-0.323552	TRUE	HYPO	HYPO	TRUE	HYPER	0	FALSE	0	0	FALSE	0	0
									UBE2S	1	0.0818475	0.000539532	0.192636	0.828868	0.0520557	1	0.120225	0.589139	0.110788	1	-0.0297918	1	0.0383776	0.220725	-0.14058	1	-0.0724104	1	0.0681694	-0.323481	FALSE	0	0	TRUE	HYPO	0	FALSE	0	0	TRUE	HYPER	HYPER
									LAMP3	0.849184	0.242218	0.0002355	0.43417	0.00142807	0.421058	1	0.242492	0.852453	0.191952	0.874495	0.17884	1	0.000273841	1	-0.0131127	1	-0.191679	1	-0.178566	-0.323481	FALSE	0	0	TRUE	HYPO	HYPO	FALSE	0	0	FALSE	HYPER	0
									C3orf58	0.362139	0.234062	1.43781e-05	0.359941	0.080117	0.19016	1	0.205983	0.93282	0.125878	1	-0.0439028	1	-0.0280798	0.603428	-0.169781	1	-0.153958	1	0.015823	-0.323435	FALSE	0	0	TRUE	HYPO	HYPER	FALSE	0	0	TRUE	HYPER	HYPER
									SLC16A10	0.073652	0.31257	4.78897e-06	0.364885	2.79024e-07	0.451128	0.773965	0.242951	1	0.0523153	0.744225	0.138558	1	-0.0696189	1	0.0862423	1	-0.121934	0.939285	-0.208177	-0.323252	FALSE	HYPER	0	TRUE	HYPO	0	FALSE	0	0	FALSE	0	0
									GPRC5C	0.602134	-0.272416	0.00188248	-0.361365	0.000177671	-0.468112	0.604491	-0.385048	1	-0.0889494	0.743763	-0.195697	1	-0.112632	1	-0.106747	1	-0.0236829	1	0.0830642	-0.323136	FALSE	HYPO	0	TRUE	HYPER	HYPER	FALSE	0	0	FALSE	0	0
									PSCD4	1	0.0334088	0.187869	0.195791	0.0039001	0.367512	0.839319	0.321172	0.961592	0.162382	0.125571	0.334103	1	0.287763	1	0.171721	1	0.125382	1	-0.0463395	-0.323096	TRUE	HYPER	0	TRUE	HYPO	HYPO	FALSE	0	0	FALSE	0	0
									TNFAIP3	1	-0.0702387	0.00985734	0.201282	0.000816105	0.276218	1	0.0600644	0.0486052	0.271521	0.00507179	0.346457	1	0.130303	1	0.0749356	1	-0.141218	0.786881	-0.216153	-0.322945	FALSE	HYPER	0	FALSE	0	0	FALSE	HYPO	0	FALSE	0	0
									IL12RB2	1	0.121601	0.00784479	0.202382	0.62736	0.089641	1	0.053559	1	0.0807808	1	-0.0319604	1	-0.0680424	1	-0.112741	1	-0.148823	1	-0.036082	-0.322944	FALSE	0	0	TRUE	HYPO	HYPO	FALSE	0	0	TRUE	HYPER	HYPO
									SOX12	1	-0.0332899	0.00287637	-0.235325	0.000304165	-0.3057	0.23461	-0.335073	0.258028	-0.202035	0.045551	-0.27241	1	-0.301784	1	-0.0703743	1	-0.0997481	1	-0.0293738	-0.322872	FALSE	0	0	FALSE	HYPER	0	FALSE	0	0	FALSE	0	0
									NFATC4	1	-0.149598	0.000304513	-0.387337	0.00243924	-0.365109	1	-0.145619	0.448466	-0.237739	0.546258	-0.215511	1	0.00397878	1	0.0222282	1	0.241718	1	0.21949	-0.322751	FALSE	0	0	TRUE	HYPER	HYPER	FALSE	0	0	FALSE	HYPO	0
									CA6	0.928616	0.170256	6.67346e-05	0.348404	0.0266406	0.233984	1	0.201582	0.573459	0.178148	1	0.0637283	1	0.0313264	1	-0.114419	1	-0.146821	1	-0.0324019	-0.32233	FALSE	0	0	TRUE	HYPO	HYPO	FALSE	0	0	FALSE	HYPER	0
									MPV17L	1	-0.150402	0.00670272	-0.267969	0.0226901	-0.257305	0.69682	-0.300793	1	-0.117568	1	-0.106903	1	-0.150391	1	0.0106646	1	-0.0328233	1	-0.0434879	-0.321945	FALSE	0	0	TRUE	HYPER	0	FALSE	0	0	FALSE	0	0
									LDHD	1	0.0981922	0.0278486	-0.247543	0.0329595	-0.267238	1	-0.0440566	0.0866032	-0.345735	0.0458662	-0.36543	1	-0.142249	1	-0.019695	1	0.203486	1	0.223181	-0.321738	FALSE	HYPO	0	FALSE	0	0	FALSE	HYPER	0	FALSE	0	0
									PSMB3	0.0063572	-0.417131	0.00189674	-0.270091	0.0195241	-0.235198	0.717852	-0.267467	0.782456	0.14704	0.465955	0.181933	1	0.149663	1	0.0348927	1	0.00262312	1	-0.0322696	-0.321708	FALSE	0	0	TRUE	HYPER	0	FALSE	HYPO	0	FALSE	0	0
									C8orf46	0.170871	0.207288	0.000420254	0.221665	0.000180824	0.257123	0.780802	0.185571	1	0.0143779	1	0.0498358	1	-0.0217163	1	0.0354579	1	-0.0360942	1	-0.0715521	-0.321336	FALSE	HYPER	0	TRUE	HYPO	HYPER	FALSE	0	0	FALSE	0	0
									ARL1	1	0.00556712	0.0962726	-0.15648	0.0244279	-0.211004	1	-0.186428	0.547487	-0.162047	0.181282	-0.216571	1	-0.191995	1	-0.0545235	1	-0.0299478	1	0.0245757	-0.321306	TRUE	HYPO	HYPO	TRUE	HYPER	0	FALSE	0	0	FALSE	0	0
									ADAMTS1	1	0.210949	0.000126584	0.566785	3.01447e-05	0.676402	1	0.315158	0.360263	0.355836	0.0946875	0.465453	1	0.104209	1	0.109617	1	-0.251627	1	-0.361244	-0.321043	FALSE	HYPER	0	TRUE	HYPO	0	FALSE	0	0	FALSE	0	0
									E4F1	0.216379	-0.231292	5.04098e-09	-0.428656	2.29163e-08	-0.445426	1	-0.181962	0.230197	-0.197364	0.13581	-0.214135	1	0.0493292	1	-0.0167704	1	0.246693	0.506957	0.263464	-0.32062	FALSE	HYPO	0	TRUE	HYPER	0	FALSE	0	0	FALSE	0	0
									SFXN2	1	-0.0856916	0.0862108	-0.160296	0.0305502	-0.206015	1	0.0307835	1	-0.0746045	0.866332	-0.120324	1	0.116475	1	-0.0457191	1	0.19108	0.735366	0.236799	-0.320457	TRUE	HYPO	HYPO	TRUE	0	0	FALSE	0	0	FALSE	0	0
									NFAT5	0.322061	0.380972	0.0254766	0.320801	0.0121272	0.386535	1	0.163779	1	-0.0601711	1	0.00556301	1	-0.217193	1	0.0657342	1	-0.157022	1	-0.222756	-0.320347	FALSE	HYPER	0	TRUE	HYPO	0	FALSE	0	0	FALSE	0	0
									FRS2	0.629506	-0.267596	0.000265587	-0.415598	1.80107e-06	-0.589787	1	-0.175379	1	-0.148002	0.161609	-0.322191	1	0.0922172	1	-0.174189	1	0.240219	0.505641	0.414408	-0.320329	FALSE	HYPO	0	TRUE	HYPER	HYPER	FALSE	0	0	FALSE	0	0
									FBLN1	0.971971	0.188241	0.00115351	0.330617	0.000898482	0.370284	0.839319	0.286774	0.974797	0.142375	0.676778	0.182043	1	0.098533	1	0.0396674	1	-0.0438423	1	-0.0835097	-0.320305	FALSE	HYPER	0	TRUE	HYPO	0	FALSE	0	0	FALSE	0	0
									ZNF251	1	-0.0320973	0.0430774	-0.159026	6.86173e-05	-0.305868	1	-0.153267	0.725657	-0.126929	0.0239572	-0.27377	1	-0.12117	0.538943	-0.146842	1	0.005759	1	0.152601	-0.320137	FALSE	HYPO	0	FALSE	HYPER	0	FALSE	0	0	FALSE	0	0
									CCDC56	1	-0.114057	0.00670914	-0.433889	0.000235051	-0.621299	1	-0.175089	0.538784	-0.319831	0.0698458	-0.507241	1	-0.0610317	1	-0.18741	1	0.258799	0.789249	0.446209	-0.319747	FALSE	HYPO	0	TRUE	HYPER	0	FALSE	0	0	FALSE	0	0
									DNMBP	0.695927	-0.264521	0.000370417	-0.418899	0.000139196	-0.489469	1	-0.294678	1	-0.154378	0.61198	-0.224948	1	-0.0301575	1	-0.0705704	1	0.124221	1	0.194791	-0.319576	FALSE	HYPO	0	TRUE	HYPER	0	FALSE	0	0	FALSE	0	0
									MARK1	1	0.141162	6.42635e-05	0.331797	0.00173696	0.293486	1	0.107077	0.418999	0.190635	0.674134	0.152324	1	-0.034085	1	-0.0383108	1	-0.22472	1	-0.186409	-0.319442	FALSE	0	0	TRUE	HYPO	HYPER	FALSE	0	0	FALSE	HYPER	0
									CNDP2	1	0.0902752	2.188e-05	0.320774	1.83202e-06	0.395456	0.638203	0.254244	0.141339	0.230498	0.0194629	0.305181	1	0.163969	1	0.0746822	1	-0.0665296	1	-0.141212	-0.319043	FALSE	HYPER	0	FALSE	HYPO	0	FALSE	0	0	FALSE	0	0
									CPEB4	1	-0.112834	5.58838e-06	-0.449749	3.06084e-07	-0.557745	1	-0.222497	0.0842065	-0.336915	0.00803743	-0.444912	1	-0.109663	1	-0.107997	1	0.227252	0.577307	0.335248	-0.318934	FALSE	HYPO	0	FALSE	HYPER	0	FALSE	0	0	FALSE	0	0
									TC2N	0.936396	-0.146529	0.0594734	-0.164389	1	0.0306369	1	-0.00641838	1	-0.0178602	0.360444	0.177166	1	0.140111	0.214684	0.195026	1	0.157971	1	-0.0370553	-0.318114	FALSE	HYPER	0	FALSE	0	0	FALSE	0	0	FALSE	HYPO	0
									AHI1	1	-0.0457597	0.000672869	-0.301611	0.000570992	-0.335095	1	-0.163222	0.172029	-0.255851	0.0713211	-0.289335	1	-0.117463	1	-0.033484	1	0.138389	1	0.171873	-0.318066	FALSE	HYPO	0	TRUE	HYPER	HYPER	FALSE	0	0	FALSE	0	0
									KCTD2	0.157427	0.250507	0.982826	0.0393835	1	-0.017473	1	0.165661	0.188386	-0.211124	0.0402124	-0.26798	1	-0.0848464	1	-0.0568565	1	0.126277	0.985428	0.183134	-0.317107	TRUE	HYPO	HYPER	FALSE	0	0	TRUE	HYPER	HYPER	FALSE	0	0
									NRARP	1	-0.0464513	0.000125817	-0.276956	0.0115591	-0.21293	1	-0.172529	0.111694	-0.230505	0.376783	-0.166479	1	-0.126078	1	0.0640264	1	0.104427	1	0.040401	-0.31675	FALSE	0	0	TRUE	HYPER	HYPER	FALSE	0	0	FALSE	HYPO	0
									WWP2	0.134241	0.213017	0.207192	0.104792	0.0403069	0.154711	1	0.0616239	0.757954	-0.108224	1	-0.0583055	1	-0.151393	1	0.0499188	1	-0.0431684	1	-0.0930872	-0.315956	TRUE	0	0	TRUE	HYPO	0	FALSE	HYPER	0	FALSE	0	0
									CD97	1	0.110374	1.19469e-09	0.51138	3.28838e-09	0.540011	0.188163	0.38277	0.00328438	0.401006	0.00171644	0.429637	1	0.272396	1	0.0286312	1	-0.12861	1	-0.157241	-0.315865	FALSE	HYPER	0	FALSE	HYPO	0	FALSE	0	0	FALSE	0	0
									PAXIP1	1	-0.0449343	0.122537	-0.153084	0.00217124	-0.276639	1	-0.117963	1	-0.10815	0.1471	-0.231705	1	-0.0730291	1	-0.123555	1	0.0351208	1	0.158676	-0.315816	TRUE	HYPO	HYPO	TRUE	HYPER	0	FALSE	0	0	FALSE	0	0
									HS3ST1	0.836874	0.23036	0.0024816	0.345382	0.000290567	0.444289	1	0.147054	1	0.115022	0.610415	0.213929	1	-0.083306	1	0.0989071	1	-0.198328	0.886702	-0.297235	-0.315775	FALSE	HYPER	0	TRUE	HYPO	0	FALSE	0	0	FALSE	0	0
									QRSL1	0.32469	0.388073	0.0201521	0.337493	0.0332719	0.349829	1	0.108442	1	-0.05058	1	-0.0382442	1	-0.279631	1	0.0123358	1	-0.229051	1	-0.241387	-0.315536	FALSE	0	0	TRUE	HYPO	HYPO	FALSE	HYPER	0	FALSE	0	0
									KIAA1524	1	0.186439	0.0236851	0.257136	0.99119	0.0539412	0.467702	0.386741	1	0.0706977	1	-0.132497	1	0.200302	0.694981	-0.203195	1	0.129605	0.655806	0.3328	-0.315288	FALSE	0	0	TRUE	HYPO	0	FALSE	0	0	TRUE	0	0
									GMFG	1	-0.125582	0.00976483	0.229841	0.0326118	0.219432	1	0.0284447	0.0168017	0.355423	0.0164642	0.345014	1	0.154026	1	-0.010409	1	-0.201397	1	-0.190988	-0.31525	FALSE	0	0	FALSE	0	0	FALSE	HYPO	0	FALSE	HYPER	0
									TJP3	0.92345	-0.148242	0.000245473	-0.279704	0.00713942	-0.235824	0.706759	-0.240802	0.784167	-0.131462	1	-0.0875822	1	-0.0925603	1	0.0438802	1	0.0389021	1	-0.00497808	-0.314995	FALSE	0	0	TRUE	HYPER	HYPER	FALSE	0	0	FALSE	HYPO	0
									VAT1	0.995912	-0.19695	0.334728	-0.16008	0.00467686	-0.344908	0.773965	-0.320029	1	0.03687	0.955375	-0.147958	1	-0.123079	0.913096	-0.184828	1	-0.159949	1	0.0248789	-0.314928	TRUE	HYPO	0	TRUE	HYPER	HYPER	FALSE	0	0	FALSE	0	0
									KCTD3	1	-0.143523	6.13945e-06	-0.509838	2.02008e-07	-0.64525	0.914472	-0.305303	0.105957	-0.366315	0.00884088	-0.501727	1	-0.16178	1	-0.135412	1	0.204535	0.746991	0.339946	-0.314789	FALSE	HYPO	0	FALSE	HYPER	0	FALSE	0	0	FALSE	0	0
									HIF1A	1	0.0732108	0.000540221	0.345118	0.00567041	0.313422	1	0.144717	0.218508	0.271907	0.313855	0.240212	1	0.0715063	1	-0.0316959	1	-0.200401	1	-0.168705	-0.314741	FALSE	0	0	TRUE	HYPO	0	FALSE	0	0	FALSE	HYPER	0
									ZNF710	0.0127116	-0.43621	0.946821	-0.0610484	1	-0.0370894	0.900279	-0.255487	0.0265428	0.375161	0.0118849	0.39912	1	0.180723	1	0.023959	1	-0.194438	1	-0.218397	-0.31454	FALSE	0	0	FALSE	HYPER	0	TRUE	HYPO	0	FALSE	0	0
									MYO5C	1	-0.0737827	0.000594558	-0.226487	0.0271451	-0.173637	1	-0.0644	0.393173	-0.152704	0.866896	-0.0998541	1	0.0093827	1	0.0528502	1	0.162087	1	0.109237	-0.314175	FALSE	0	0	TRUE	HYPER	HYPER	FALSE	0	0	FALSE	HYPO	0
									DEPDC7	1	0.156669	0.0039465	0.302977	0.00361727	0.335438	1	0.0670912	0.967836	0.146309	0.717927	0.178769	1	-0.0895775	1	0.0324609	1	-0.235886	0.906315	-0.268347	-0.313928	FALSE	HYPER	0	TRUE	HYPO	0	FALSE	0	0	FALSE	0	0
									SLC23A1	0.301784	-0.303321	0.0121441	-0.27452	0.0747912	-0.237819	1	-0.117731	1	0.0288011	1	0.0655021	1	0.18559	1	0.036701	1	0.156789	1	0.120088	-0.313872	FALSE	0	0	TRUE	HYPER	0	FALSE	HYPO	0	TRUE	0	0
									GLYATL2	1	0.03011	0.0167041	0.251587	0.00674244	0.306826	1	0.218033	0.435614	0.221477	0.169357	0.276716	1	0.187923	1	0.0552388	1	-0.0335541	1	-0.0887928	-0.313816	FALSE	HYPER	0	TRUE	HYPO	HYPER	FALSE	0	0	FALSE	0	0
									KIF23	1	0.160067	0.0159019	0.236397	0.99579	0.0445093	1	0.211421	1	0.0763298	1	-0.115558	1	0.0513534	0.545618	-0.191888	1	-0.0249764	1	0.166911	-0.313686	FALSE	0	0	TRUE	HYPO	HYPO	FALSE	0	0	TRUE	HYPER	0
									MSH6	1	0.100122	0.00262751	0.300371	0.955369	0.0658398	1	0.0748711	0.551298	0.200249	1	-0.0342822	1	-0.0252509	0.282173	-0.234531	1	-0.2255	1	0.00903127	-0.3133	FALSE	0	0	TRUE	HYPO	0	FALSE	0	0	TRUE	HYPER	0
									MMP1	1	0.0343329	0.00154679	0.285881	0.528174	0.120772	1	0.144122	0.188981	0.251549	1	0.0864395	1	0.10979	0.776092	-0.165109	1	-0.141759	1	0.02335	-0.313001	FALSE	0	0	TRUE	HYPO	HYPO	FALSE	0	0	TRUE	HYPER	0
									TMEM30B	1	-0.0056731	0.00296417	-0.226583	0.000254643	-0.29854	1	-0.066342	0.15124	-0.220909	0.0212404	-0.292867	1	-0.0606689	1	-0.0719578	1	0.160241	0.671524	0.232198	-0.313001	FALSE	HYPO	0	FALSE	HYPER	0	FALSE	0	0	FALSE	0	0
									RCAN1	0.146218	0.210795	0.000134539	0.234717	1.36384e-07	0.3545	1	0.0699245	1	0.0239217	0.359354	0.143705	1	-0.140871	0.686331	0.119783	1	-0.164792	0.347828	-0.284575	-0.312643	FALSE	HYPER	0	TRUE	HYPO	HYPER	FALSE	0	0	FALSE	0	0
									SNED1	0.370134	-0.345968	7.2931e-05	-0.493017	0.0023756	-0.428062	1	-0.190249	1	-0.147049	1	-0.0820936	1	0.15572	1	0.0649555	1	0.302769	1	0.237813	-0.312325	FALSE	0	0	TRUE	HYPER	0	FALSE	0	0	FALSE	HYPO	0
									SERPINF1	0.134579	-0.233938	0.0934311	-0.135569	0.527341	-0.0922098	0.547925	-0.236174	0.957497	0.0983693	0.491977	0.141728	1	-0.00223648	1	0.0433588	1	-0.100606	1	-0.143965	-0.312284	FALSE	0	0	FALSE	HYPER	0	FALSE	0	0	FALSE	0	0
									S100P	1	-0.173842	0.033499	-0.259112	0.0141082	-0.318229	1	-0.0250972	1	-0.0852706	1	-0.144387	1	0.148745	1	-0.0591164	1	0.234015	0.901013	0.293132	-0.312215	FALSE	HYPO	0	TRUE	HYPER	HYPO	FALSE	0	0	FALSE	0	0
									AIM1	0.140444	-0.396791	0.015252	-0.297374	0.169337	-0.226832	1	-0.11659	1	0.0994173	0.901873	0.169959	1	0.280202	1	0.0705417	1	0.180784	1	0.110243	-0.312105	FALSE	0	0	TRUE	HYPER	HYPER	FALSE	HYPO	0	TRUE	0	0
									ZNF643	0.38022	0.248326	6.144e-08	0.489153	9.16341e-05	0.388171	0.504221	0.32409	0.247799	0.240826	0.85596	0.139845	1	0.0757642	1	-0.100982	1	-0.165062	1	-0.0640803	-0.311413	FALSE	0	0	TRUE	HYPO	HYPO	FALSE	0	0	FALSE	HYPER	0
									USP3	0.0586236	-0.394531	5.58177e-10	-0.626363	7.31463e-09	-0.630421	0.689567	-0.316664	0.391159	-0.231831	0.337598	-0.23589	1	0.0778673	1	-0.0040589	1	0.309698	0.657251	0.313757	-0.31139	FALSE	0	0	TRUE	HYPER	HYPER	FALSE	0	0	FALSE	HYPO	0
									C9orf75	0.435301	-0.272835	0.000707003	-0.353568	0.0011582	-0.374745	1	-0.0514738	1	-0.0807331	1	-0.10191	1	0.221361	1	-0.0211769	1	0.302095	0.671524	0.323271	-0.311213	FALSE	HYPO	0	TRUE	HYPER	0	FALSE	0	0	FALSE	0	0
									JMJD2A	0.368574	0.289816	0.0775045	0.216539	0.00625194	0.327778	1	0.241362	1	-0.0732765	1	0.0379621	1	-0.0484533	1	0.111239	1	0.0248233	1	-0.0864153	-0.311106	TRUE	HYPER	HYPER	TRUE	HYPO	0	FALSE	0	0	FALSE	0	0
									NAB1	0.137481	0.265889	0.000786106	0.261593	1.80462e-05	0.36028	1	0.128452	1	-0.00429656	1	0.094391	1	-0.137437	1	0.0986875	1	-0.133141	0.735006	-0.231828	-0.310679	FALSE	HYPER	0	TRUE	HYPO	0	FALSE	0	0	FALSE	0	0
									NNMT	1	0.0771474	0.288535	0.132127	0.00568201	0.267128	1	0.0938381	1	0.0549794	0.401345	0.18998	1	0.0166907	1	0.135001	1	-0.0382887	1	-0.17329	-0.309961	TRUE	HYPER	HYPER	TRUE	HYPO	0	FALSE	0	0	FALSE	0	0
									ACSL1	1	-0.0313684	0.000126145	0.381833	0.00010126	0.425422	1	0.249745	0.0196664	0.413201	0.00645359	0.45679	1	0.281114	1	0.0435891	1	-0.132088	1	-0.175677	-0.309502	FALSE	HYPER	0	FALSE	0	0	FALSE	HYPO	0	FALSE	0	0
									DAP	1	-0.0205707	0.0260598	0.179379	0.0159054	0.21028	1	0.0669595	0.233746	0.19995	0.0987234	0.230851	1	0.0875302	1	0.0309008	1	-0.11242	1	-0.143321	-0.309492	FALSE	HYPER	0	TRUE	0	0	FALSE	HYPO	0	FALSE	0	0
									PALM2	0.842466	0.277554	0.0226147	0.331229	0.00289148	0.45302	1	0.189629	1	0.0536755	1	0.175466	1	-0.0879247	1	0.121791	1	-0.1416	1	-0.263391	-0.309381	FALSE	HYPER	0	TRUE	HYPO	HYPO	FALSE	0	0	FALSE	0	0
									GRAMD2	1	-0.0337533	0.0295302	0.180106	0.0126706	0.220123	1	0.0189454	0.195064	0.21386	0.0636658	0.253877	1	0.0526987	1	0.0400169	1	-0.161161	0.892598	-0.201178	-0.309376	FALSE	HYPER	0	TRUE	0	0	FALSE	HYPO	0	FALSE	0	0
									TUBB2B	0.57237	0.401286	0.00359428	0.494315	0.117982	0.3481	1	0.280955	1	0.0930298	1	-0.0531857	1	-0.12033	1	-0.146216	1	-0.21336	1	-0.0671444	-0.309376	FALSE	0	0	TRUE	HYPO	HYPO	FALSE	0	0	TRUE	HYPER	HYPO
									RRM2	1	0.0418224	0.010172	0.239508	0.335166	0.145238	0.856936	0.249474	0.442717	0.197686	1	0.103416	1	0.207652	1	-0.0942698	1	0.00996624	1	0.104236	-0.309192	FALSE	0	0	TRUE	HYPO	HYPO	FALSE	0	0	TRUE	0	0
									PADI2	0.685645	-0.233878	0.302944	0.158407	0.00802819	0.31374	1	0.0160069	0.0375912	0.392286	0.00115473	0.547618	1	0.249885	1	0.155332	1	-0.1424	0.78961	-0.297733	-0.309151	FALSE	HYPER	0	FALSE	0	0	FALSE	HYPO	0	FALSE	0	0
									TCF19	0.901821	0.178939	0.000758903	0.308923	0.446534	0.133905	1	0.200673	0.969206	0.129984	1	-0.0450339	1	0.0217338	0.701615	-0.175018	1	-0.10825	1	0.0667677	-0.30842	FALSE	0	0	TRUE	HYPO	0	FALSE	0	0	TRUE	HYPER	0
									ARRB1	0.0320051	-0.266012	7.45624e-06	-0.27651	5.53306e-05	-0.274371	0.158212	-0.300063	1	-0.0104973	1	-0.00835839	1	-0.0340506	1	0.00213889	1	-0.0235533	1	-0.0256922	-0.308164	FALSE	0	0	TRUE	HYPER	HYPER	FALSE	0	0	FALSE	0	0
									C18orf24	1	-0.015131	1	0.00532546	0.0201594	-0.132814	1	0.0711021	1	0.0204565	0.307025	-0.117683	1	0.0862331	0.133241	-0.13814	1	0.0657766	0.386284	0.203916	-0.30811	TRUE	HYPO	HYPO	TRUE	0	0	FALSE	0	0	FALSE	0	0
									LBH	0.77676	0.186875	0.135589	0.162805	1.28048e-06	0.457478	1	0.185179	1	-0.0240703	0.0988479	0.270603	1	-0.00169566	0.045426	0.294673	1	0.0223747	0.671524	-0.272299	-0.307649	TRUE	HYPER	HYPER	FALSE	HYPO	0	FALSE	0	0	FALSE	0	0
									IQCD	0.781775	-0.330789	0.301666	-0.238648	0.00865506	-0.468332	1	-0.0584615	1	0.0921404	1	-0.137544	1	0.272327	1	-0.229684	1	0.180187	0.895612	0.409871	-0.307286	TRUE	HYPO	HYPO	TRUE	HYPER	HYPO	FALSE	0	0	FALSE	0	0
									ZBTB43	1	0.00430102	0.43606	-0.0739202	0.0472069	-0.133942	0.682055	-0.175003	0.967836	-0.0782212	0.263576	-0.138243	1	-0.179304	1	-0.0600214	1	-0.101083	1	-0.0410613	-0.307073	TRUE	0	0	TRUE	0	0	FALSE	HYPER	0	FALSE	0	0
									P2RY6	0.188693	-0.227361	0.689851	0.073602	0.760356	0.0732432	1	-0.0453178	0.0128966	0.300963	0.0109467	0.300604	1	0.182043	1	-0.000358789	1	-0.11892	1	-0.118561	-0.307021	FALSE	0	0	FALSE	0	0	TRUE	HYPO	HYPO	FALSE	HYPER	0
									TMEM25	0.985029	-0.270188	0.00501035	-0.422609	0.0764084	-0.331506	1	-0.167636	1	-0.15242	1	-0.0613179	1	0.102552	1	0.0911025	1	0.254972	1	0.16387	-0.306656	FALSE	0	0	TRUE	HYPER	0	FALSE	0	0	TRUE	HYPO	0
									THNSL1	0.282041	0.345576	1	0.00273618	0.718533	-0.128198	1	0.0965538	0.15604	-0.34284	0.0160012	-0.473775	1	-0.249023	1	-0.130935	1	0.0938176	1	0.224752	-0.30626	TRUE	HYPO	HYPO	FALSE	0	0	TRUE	HYPER	0	FALSE	0	0
									ZAK	1	0.0505794	0.0641191	-0.1871	0.197015	-0.166326	1	-0.046376	0.229691	-0.237679	0.289809	-0.216905	1	-0.0969554	1	0.0207745	1	0.140724	1	0.11995	-0.306161	FALSE	0	0	FALSE	0	0	FALSE	HYPER	0	FALSE	HYPO	0
									UBN1	1	-0.0428949	0.0398707	-0.233617	0.00163216	-0.360744	0.846515	-0.290783	0.684919	-0.190722	0.0987775	-0.317849	1	-0.247889	1	-0.127127	1	-0.0571664	1	0.0699607	-0.305858	FALSE	HYPO	0	TRUE	HYPER	0	FALSE	0	0	FALSE	0	0
									SLC45A3	1	0.0968598	0.00638803	0.27216	0.0108313	0.283134	1	-0.0730894	0.707974	0.175301	0.593453	0.186274	1	-0.169949	1	0.0109733	1	-0.34525	0.468401	-0.356223	-0.305747	FALSE	HYPER	0	TRUE	0	0	FALSE	0	0	FALSE	0	0
									DENND1C	1	0.111296	0.00472776	0.259447	0.0026915	0.300014	0.809568	0.259093	0.819099	0.148151	0.470923	0.188718	1	0.147798	1	0.0405668	1	-0.000353588	1	-0.0409204	-0.305679	FALSE	HYPER	0	TRUE	HYPO	HYPO	FALSE	0	0	FALSE	0	0
									TCL1A	1	0.0711307	0.00596671	0.175499	7.55488e-05	0.265213	0.666927	0.201919	0.799507	0.104369	0.0896828	0.194083	1	0.130789	1	0.0897139	1	0.0264202	1	-0.0632938	-0.305425	FALSE	HYPER	0	TRUE	HYPO	HYPO	FALSE	0	0	FALSE	0	0
									C1QB	1	0.0794077	0.000782689	0.206667	0.000131088	0.255113	0.276891	0.254983	0.533513	0.127259	0.147305	0.175705	1	0.175576	1	0.0484458	1	0.0483164	1	-0.000129386	-0.305226	FALSE	HYPER	0	TRUE	HYPO	HYPO	FALSE	0	0	FALSE	0	0
									MAP3K13	1	-0.121064	0.028663	-0.215765	0.0505747	-0.2202	1	0.0303236	1	-0.0947005	1	-0.0991358	1	0.151388	1	-0.00443529	1	0.246089	0.832755	0.250524	-0.304981	FALSE	0	0	TRUE	0	0	FALSE	0	0	TRUE	HYPO	0
									PRKX	0.901821	0.17081	0.00298551	0.264495	0.00191079	0.301655	1	0.101959	1	0.0936858	0.877771	0.130845	1	-0.0688507	1	0.0371592	1	-0.162536	1	-0.199696	-0.304277	FALSE	HYPER	0	TRUE	HYPO	HYPER	FALSE	0	0	FALSE	0	0
									RUNDC1	1	-0.068821	0.00405446	-0.336731	0.00568201	-0.358482	0.606834	-0.383231	0.376294	-0.26791	0.257821	-0.289661	1	-0.31441	1	-0.0217509	1	-0.0465	1	-0.0247492	-0.304248	FALSE	0	0	TRUE	HYPER	0	FALSE	0	0	FALSE	0	0
									ATG2B	0.362099	-0.191626	0.00470017	-0.201181	0.0109533	-0.202872	0.839319	-0.196522	1	-0.00955511	1	-0.011246	1	-0.00489632	1	-0.00169086	1	0.00465879	1	0.00634965	-0.304194	FALSE	0	0	TRUE	HYPER	0	FALSE	0	0	FALSE	HYPO	0
									PADI3	0.365491	-0.2331	0.684759	0.0888987	0.172993	0.163875	1	0.0952892	0.0354983	0.321998	0.00438882	0.396975	1	0.328389	1	0.0749762	1	0.00639048	1	-0.0685857	-0.304021	FALSE	HYPER	0	FALSE	0	0	TRUE	HYPO	HYPO	FALSE	0	0
									CPEB2	1	-0.058041	0.00438553	-0.159565	0.00912831	-0.163089	0.998108	-0.136383	0.677746	-0.101524	0.595891	-0.105048	1	-0.0783425	1	-0.00352448	1	0.0231815	1	0.026706	-0.303868	FALSE	HYPO	0	TRUE	HYPER	HYPER	FALSE	0	0	FALSE	0	0
									C16orf5	0.401978	0.178378	5.71023e-08	0.357329	4.61365e-07	0.361964	1	0.124367	0.230197	0.178951	0.176256	0.183585	1	-0.0540114	1	0.00463423	1	-0.232962	0.513859	-0.237597	-0.303778	FALSE	0	0	TRUE	HYPO	HYPER	FALSE	0	0	FALSE	HYPER	0
							X		LAMB3	1	-0.00825155	0.0540418	0.162278	0.00245563	0.252663	1	0.182229	0.407108	0.170529	0.0471277	0.260915	1	0.190481	1	0.0903857	1	0.0199518	1	-0.0704339	-0.303677	TRUE	HYPER	0	FALSE	0	0	FALSE	HYPO	0	FALSE	0	0
									CREB3L2	1	-0.0582933	0.389094	0.0996878	0.0433201	0.175159	1	0.0270448	0.43434	0.157981	0.0671325	0.233452	1	0.0853381	1	0.0754711	1	-0.0726431	1	-0.148114	-0.303226	TRUE	HYPER	HYPER	TRUE	0	0	FALSE	HYPO	0	FALSE	0	0
									LAP3	1	0.112874	0.000367822	0.243068	0.0323855	0.176289	1	0.0942	0.648632	0.130194	1	0.0634153	1	-0.0186741	1	-0.0667783	1	-0.148868	1	-0.0820894	-0.302293	FALSE	0	0	TRUE	HYPO	HYPO	FALSE	0	0	FALSE	HYPER	0
									RGS20	0.871115	0.139408	8.92897e-05	0.269692	6.43125e-08	0.408363	1	0.145207	0.674672	0.130284	0.024301	0.268954	1	0.00579827	0.617681	0.13867	1	-0.124486	0.454124	-0.263156	-0.302015	FALSE	HYPER	0	FALSE	HYPO	0	FALSE	0	0	FALSE	0	0
									PGAM1	1	0.0895806	0.00058767	0.330452	0.109864	0.204529	1	0.20149	0.301658	0.240871	1	0.114949	1	0.111909	1	-0.125922	1	-0.128962	1	-0.00303926	-0.301975	FALSE	0	0	TRUE	HYPO	0	FALSE	0	0	TRUE	HYPER	0
									INHBB	0.0302763	-0.748183	0.00702926	-0.490895	0.247775	-0.312595	1	-0.4311	0.945696	0.257288	0.282321	0.435588	1	0.317083	1	0.1783	1	0.0597952	1	-0.118505	-0.30181	FALSE	0	0	TRUE	HYPER	0	FALSE	HYPO	0	FALSE	0	0
									UGP2	1	-0.0543864	0.0562011	0.248629	0.0195928	0.315485	1	0.239135	0.248352	0.303015	0.0782152	0.369872	1	0.293521	1	0.0668566	1	-0.00949408	1	-0.0763507	-0.301783	TRUE	HYPER	0	TRUE	0	0	FALSE	HYPO	0	FALSE	0	0
									CLDN23	0.220529	0.23485	0.000393684	0.264557	0.00143951	0.264893	1	0.163172	1	0.0297066	1	0.0300421	1	-0.071679	1	0.000335546	1	-0.101386	1	-0.101721	-0.301349	FALSE	0	0	TRUE	HYPO	0	FALSE	0	0	FALSE	HYPER	0
									SMC4	0.525764	0.293709	0.0177977	0.29613	0.953678	-0.0800615	0.261009	0.498858	1	0.00242158	0.0845959	-0.37377	1	0.20515	0.0727732	-0.376192	1	0.202728	0.277076	0.57892	-0.301335	FALSE	HYPO	0	TRUE	0	0	FALSE	0	0	TRUE	0	0
									IFITM2	0.191663	-0.147069	0.000665521	-0.155713	0.0163235	-0.128072	0.202791	-0.20598	1	-0.0086439	1	0.0189963	1	-0.0589116	1	0.0276402	1	-0.0502677	1	-0.0779079	-0.300805	FALSE	0	0	TRUE	HYPER	HYPER	FALSE	0	0	FALSE	0	0
									SLC15A3	1	-0.0584191	0.00423029	0.193112	0.0149544	0.186285	1	0.107678	0.0350024	0.251531	0.0316506	0.244704	1	0.166097	1	-0.00682773	1	-0.0854341	1	-0.0786063	-0.29998	FALSE	0	0	FALSE	0	0	FALSE	HYPO	0	FALSE	HYPER	0
									C4orf36	1	0.0915384	0.0455428	-0.269065	0.0116725	-0.351574	1	-0.0910106	0.1431	-0.360604	0.0344044	-0.443113	1	-0.182549	1	-0.0825089	1	0.178055	1	0.260564	-0.299597	FALSE	HYPO	0	FALSE	0	0	FALSE	HYPER	0	FALSE	0	0
									IL17RB	1	0.129064	0.244545	0.158764	0.82269	-0.0924455	1	0.0144769	1	0.0297	0.382433	-0.221509	1	-0.114587	0.204453	-0.251209	1	-0.144287	1	0.106922	-0.29958	FALSE	HYPO	0	FALSE	0	0	FALSE	0	0	FALSE	HYPER	0
				X					PLA2G2A	1	0.0395672	0.00267335	0.195801	0.0402811	0.159964	0.773965	0.189855	0.330881	0.156234	0.626601	0.120397	1	0.150288	1	-0.0358372	1	-0.0059464	1	0.0298908	-0.299286	FALSE	0	0	TRUE	HYPO	HYPO	FALSE	0	0	FALSE	HYPER	0
									SPIRE1	1	0.00121476	0.00281016	-0.301612	7.4834e-07	-0.528567	1	-0.228943	0.127237	-0.302827	0.000982944	-0.529782	1	-0.230158	0.353949	-0.226955	1	0.0726697	0.716477	0.299624	-0.299224	FALSE	HYPO	0	FALSE	HYPER	0	FALSE	0	0	FALSE	0	0
									SLC4A11	0.270998	-0.235938	0.993036	-0.0378873	0.993209	0.0391501	1	-0.120044	0.29863	0.198051	0.0476507	0.275088	1	0.115894	1	0.0770374	1	-0.0821568	1	-0.159194	-0.299205	TRUE	HYPER	HYPER	FALSE	0	0	TRUE	HYPO	0	FALSE	0	0
									SH2D4A	1	-0.079728	0.0097501	-0.204527	0.236527	-0.136604	1	-0.09177	0.829793	-0.124799	1	-0.056876	1	-0.012042	1	0.0679232	1	0.112757	1	0.044834	-0.298798	FALSE	0	0	TRUE	HYPER	HYPER	FALSE	0	0	TRUE	HYPO	0
									IL6R	1	-0.0679524	0.0119237	0.202511	0.000918171	0.281475	1	0.13703	0.0612404	0.270464	0.00638318	0.349427	1	0.204983	1	0.0789634	1	-0.0654806	1	-0.144444	-0.298639	FALSE	HYPER	0	FALSE	0	0	FALSE	HYPO	0	FALSE	0	0
									NFIA	1	-0.0305301	0.0190189	-0.308445	0.338053	-0.200702	1	0.00239773	0.428416	-0.277915	0.953542	-0.170171	1	0.0329278	1	0.107744	1	0.310843	1	0.203099	-0.298502	FALSE	0	0	TRUE	0	0	FALSE	0	0	TRUE	HYPO	HYPER
									C13orf18	0.715885	0.191349	2.77837e-05	0.355904	2.6913e-06	0.437032	0.966841	0.221892	0.646586	0.164555	0.153412	0.245683	1	0.0305428	1	0.0811277	1	-0.134012	0.962542	-0.21514	-0.298186	FALSE	HYPER	0	TRUE	HYPO	HYPER	FALSE	0	0	FALSE	0	0
									CDC42BPA	0.322053	0.293025	0.441513	0.137478	0.907301	-0.0809187	1	0.0954331	0.918037	-0.155547	0.0356958	-0.373944	1	-0.197592	0.488137	-0.218397	1	-0.0420449	1	0.176352	-0.298104	TRUE	HYPO	0	FALSE	0	0	TRUE	HYPER	HYPER	FALSE	0	0
									MASTL	1	-0.149061	0.00423029	0.557677	0.153172	0.378916	1	0.352565	0.0421767	0.706737	0.17004	0.527977	1	0.501625	1	-0.178761	1	-0.205112	1	-0.0263516	-0.298048	FALSE	0	0	FALSE	0	0	FALSE	HYPO	0	TRUE	HYPER	0
									ALDH1A1	0.387119	-0.401238	0.000939884	-0.492582	0.0208774	-0.403397	1	-0.154382	1	-0.0913443	1	-0.00215959	1	0.246855	1	0.0891847	1	0.338199	1	0.249015	-0.297868	FALSE	0	0	TRUE	HYPER	0	FALSE	0	0	FALSE	HYPO	0
									SPRY2	1	0.177197	0.0105601	0.293084	0.000801755	0.40573	1	0.0538467	1	0.115888	0.490973	0.228533	1	-0.12335	1	0.112645	1	-0.239238	0.618983	-0.351883	-0.297849	FALSE	HYPER	0	TRUE	HYPO	0	FALSE	0	0	FALSE	0	0
									IL10	1	0.0147772	2.41599e-05	0.270226	0.00135622	0.231485	0.666927	0.212211	0.0285784	0.255448	0.0636658	0.216708	1	0.197434	1	-0.0387407	1	-0.0580142	1	-0.0192735	-0.297379	FALSE	0	0	FALSE	HYPO	0	FALSE	0	0	FALSE	HYPER	0
									NPAS3	0.656723	0.161708	7.94942e-05	0.273792	5.71349e-06	0.344407	1	0.108103	0.867827	0.112085	0.232691	0.1827	1	-0.0536045	1	0.0706148	1	-0.165689	0.564048	-0.236304	-0.297346	FALSE	HYPER	0	TRUE	HYPO	0	FALSE	0	0	FALSE	0	0
									NAV1	1	-0.00326245	0.993659	0.0200302	0.0831583	-0.0947638	1	0.00910108	1	0.0232926	0.442146	-0.0915014	1	0.0123635	0.153737	-0.114794	1	-0.0109291	0.981136	0.103865	-0.297127	FALSE	HYPO	0	FALSE	0	0	FALSE	0	0	FALSE	HYPER	0
									ZNF765	0.52167	-0.159801	0.00136602	-0.206908	0.439474	-0.0943503	1	-0.0988814	1	-0.0471064	1	0.0654512	1	0.06092	0.874654	0.112558	1	0.108026	1	-0.00453115	-0.296884	FALSE	0	0	TRUE	HYPER	0	FALSE	0	0	TRUE	HYPO	0
									CNNM3	1	-0.133304	0.0584548	-0.173231	4.25848e-05	-0.357347	0.882829	-0.220365	1	-0.0399273	0.170172	-0.224044	1	-0.0870619	0.360692	-0.184117	1	-0.0471346	1	0.136982	-0.296493	TRUE	HYPO	HYPO	TRUE	HYPER	0	FALSE	0	0	FALSE	0	0
									TMEM141	0.442419	-0.18806	0.0244131	-0.174667	0.0441845	-0.178126	0.857058	-0.201432	1	0.0133929	1	0.00993366	1	-0.013372	1	-0.0034592	1	-0.0267648	1	-0.0233056	-0.296445	FALSE	0	0	TRUE	HYPER	HYPO	FALSE	0	0	FALSE	0	0
									MRFAP1L1	1	0.137232	0.221392	-0.132367	0.000281229	-0.31549	1	-0.0291636	0.075795	-0.2696	0.000372307	-0.452723	1	-0.166396	0.346822	-0.183123	1	0.103203	0.505641	0.286327	-0.296394	TRUE	HYPO	HYPO	FALSE	0	0	FALSE	HYPER	0	FALSE	0	0
									CHST1	1	0.0517837	0.00145289	0.336606	0.00233796	0.355686	1	0.189024	0.219231	0.284823	0.137793	0.303902	1	0.13724	1	0.0190793	1	-0.147582	1	-0.166661	-0.296379	FALSE	HYPER	0	TRUE	HYPO	0	FALSE	0	0	FALSE	0	0
									SERTAD3	1	-0.118394	0.00956562	-0.217749	0.00558479	-0.253551	0.666927	-0.263754	1	-0.099355	0.762998	-0.135157	1	-0.14536	1	-0.0358022	1	-0.046005	1	-0.0102028	-0.296298	FALSE	0	0	TRUE	HYPER	HYPER	FALSE	0	0	FALSE	0	0
									ZNF44	1	-0.0510221	0.0473322	-0.14945	0.114077	-0.142545	0.498222	-0.240227	0.947767	-0.0984276	0.964086	-0.0915229	1	-0.189205	1	0.00690466	1	-0.0907773	1	-0.0976819	-0.29627	FALSE	0	0	TRUE	HYPER	0	FALSE	0	0	TRUE	0	0
									LEFTY2	1	0.132028	1.74837e-07	0.419419	8.2764e-07	0.433116	0.34454	0.320503	0.0596525	0.28739	0.0328284	0.301088	1	0.188475	1	0.0136979	1	-0.0989151	1	-0.112613	-0.296116	FALSE	HYPER	0	FALSE	HYPO	0	FALSE	0	0	FALSE	0	0
									PTDSS1	0.293242	0.21869	1.04937e-05	0.322936	0.0105037	0.219986	1	0.144976	0.981934	0.104246	1	0.00129635	1	-0.073714	1	-0.10295	1	-0.17796	1	-0.0750103	-0.296109	FALSE	0	0	TRUE	HYPO	0	FALSE	0	0	FALSE	HYPER	0
									SOD3	1	0.0415631	3.71082e-05	0.255305	0.000831409	0.232073	1	0.118604	0.0754709	0.213742	0.109819	0.19051	1	0.0770407	1	-0.0232321	1	-0.136701	1	-0.113469	-0.295906	FALSE	0	0	TRUE	HYPO	HYPO	FALSE	0	0	FALSE	HYPER	0
									GJC1	0.10403	0.49442	2.1344e-07	0.699306	3.87109e-09	0.879851	1	0.211117	0.927876	0.204887	0.160162	0.385431	1	-0.283302	1	0.180544	1	-0.488189	0.277076	-0.668733	-0.295779	FALSE	HYPER	0	TRUE	HYPO	0	FALSE	0	0	FALSE	0	0
									LASS2	0.103453	-0.236351	0.0143597	-0.168376	0.153268	-0.130341	0.445137	-0.242228	1	0.0679751	0.796592	0.106011	1	-0.00587605	1	0.0380358	1	-0.0738511	1	-0.111887	-0.295697	FALSE	0	0	TRUE	HYPER	0	FALSE	0	0	TRUE	0	0
									FAM128B	1	0.00550196	0.000388428	-0.286015	0.0032962	-0.266989	1	-0.0600221	0.0509725	-0.291517	0.0583783	-0.272491	1	-0.065524	1	0.019026	1	0.225993	0.940104	0.206966	-0.295511	FALSE	0	0	TRUE	HYPER	0	FALSE	0	0	FALSE	HYPO	0
									FZD8	0.251035	0.26999	0.00600025	0.251172	0.00241501	0.299906	0.670227	0.284837	1	-0.018818	1	0.0299163	1	0.014847	1	0.0487343	1	0.033665	1	-0.0150693	-0.295422	FALSE	HYPER	0	TRUE	HYPO	0	FALSE	0	0	FALSE	0	0
									ZNF342	0.437224	-0.356946	9.34996e-05	-0.525894	0.000307491	-0.538409	1	-0.251924	1	-0.168948	0.981248	-0.181463	1	0.105022	1	-0.0125151	1	0.27397	1	0.286485	-0.295394	FALSE	HYPO	0	TRUE	HYPER	0	FALSE	0	0	FALSE	0	0
									SLC1A5	0.973441	-0.167716	0.645908	0.0991127	0.22293	0.164811	1	0.0849783	0.150948	0.266829	0.033291	0.332527	1	0.252695	1	0.0656985	1	-0.0141344	1	-0.0798329	-0.295069	TRUE	HYPER	0	FALSE	0	0	TRUE	HYPO	HYPO	FALSE	0	0
									C5orf30	1	-0.00889231	0.194187	-0.0984806	0.00301357	-0.190704	1	-0.0150624	0.888404	-0.0895883	0.0842364	-0.181812	1	-0.00617008	1	-0.0922235	1	0.0834182	0.691787	0.175642	-0.295018	TRUE	HYPO	0	TRUE	HYPER	HYPER	FALSE	0	0	FALSE	0	0
									ZFX	0.0576421	-0.38452	1.63037e-05	-0.411301	6.37443e-08	-0.569433	0.547344	-0.337155	1	-0.0267806	0.613877	-0.184912	1	0.0473656	1	-0.158132	1	0.0741462	1	0.232278	-0.29473	FALSE	HYPO	0	TRUE	HYPER	HYPER	FALSE	0	0	FALSE	0	0
									FSTL3	1	-0.0396205	0.0278665	-0.117603	0.00637564	-0.153474	1	0.010421	0.881584	-0.0779828	0.364617	-0.113853	1	0.0500415	1	-0.0358703	1	0.128024	0.578288	0.163895	-0.294728	FALSE	HYPO	0	TRUE	0	0	FALSE	0	0	FALSE	0	0
									EXTL3	0.134241	0.258823	0.0119509	0.198222	0.0455321	0.184972	1	0.138748	1	-0.0606012	1	-0.0738514	1	-0.120076	1	-0.0132502	1	-0.0594744	1	-0.0462242	-0.294695	FALSE	0	0	TRUE	HYPO	HYPER	FALSE	HYPER	0	FALSE	0	0
									BCL9	0.624399	-0.182492	1.55194e-05	-0.330425	0.001687	-0.272196	1	-0.0745667	0.64985	-0.147932	1	-0.0897038	1	0.107926	1	0.0582286	1	0.255858	0.940822	0.197629	-0.294611	FALSE	0	0	TRUE	HYPER	HYPER	FALSE	0	0	FALSE	HYPO	0
									BCAM	1	-0.0894801	0.000321434	-0.261525	0.0342695	-0.186691	1	-0.154898	0.371543	-0.172044	0.981208	-0.0972109	1	-0.0654176	1	0.0748336	1	0.106627	1	0.0317933	-0.294456	FALSE	0	0	TRUE	HYPER	HYPER	FALSE	0	0	FALSE	HYPO	0
									HNMT	0.275437	-0.268593	6.38534e-06	-0.399297	0.00361004	-0.294915	1	-0.163723	0.951672	-0.130704	1	-0.0263216	1	0.10487	1	0.104383	1	0.235574	1	0.131191	-0.294424	FALSE	0	0	TRUE	HYPER	HYPER	FALSE	0	0	FALSE	HYPO	0
									BACE2	1	0.0920887	0.0191957	0.174402	0.0102007	0.207064	1	-0.0851889	1	0.0823135	0.785589	0.114975	1	-0.177278	1	0.0326616	1	-0.259591	0.386284	-0.292253	-0.294321	FALSE	HYPER	0	TRUE	0	0	FALSE	0	0	FALSE	0	0
									IQUB	1	0.0541495	0.127609	-0.159923	0.023303	-0.228565	1	-0.103498	0.297289	-0.214073	0.064354	-0.282714	1	-0.157648	1	-0.0686415	1	0.0564249	1	0.125066	-0.293986	TRUE	HYPO	HYPO	TRUE	0	0	FALSE	HYPER	0	FALSE	0	0
									FUT4	0.00105057	0.622882	4.01401e-07	0.564612	0.000435938	0.436386	0.553099	0.391467	1	-0.0582697	0.780843	-0.186496	1	-0.231415	1	-0.128226	1	-0.173145	1	-0.0449187	-0.293653	FALSE	0	0	TRUE	HYPO	0	FALSE	HYPER	0	FALSE	0	0
									MLF1IP	1	-0.130186	0.411932	-0.135734	0.00836717	-0.297234	1	-0.109334	1	-0.00554816	0.748504	-0.167048	1	0.0208519	1	-0.1615	1	0.0264001	1	0.1879	-0.293278	TRUE	HYPO	HYPO	TRUE	HYPER	0	FALSE	0	0	FALSE	0	0
									IL10RA	0.889455	0.175308	6.57145e-08	0.474252	4.86179e-08	0.525026	0.873669	0.24474	0.0791514	0.298945	0.0204478	0.349719	1	0.0694322	1	0.050774	1	-0.229512	0.648379	-0.280286	-0.293129	FALSE	HYPER	0	FALSE	HYPO	0	FALSE	0	0	FALSE	0	0
									SBDS	1	0.0138436	0.297671	-0.128072	0.00817458	-0.251836	1	-0.106349	0.787987	-0.141916	0.0808248	-0.26568	1	-0.120192	1	-0.123764	1	0.0217234	1	0.145487	-0.292868	TRUE	HYPO	HYPO	TRUE	0	0	FALSE	HYPER	0	FALSE	0	0
									SLC20A1	1	-0.064048	0.0146057	-0.225746	0.0446053	-0.216289	1	-0.0738161	0.691368	-0.161698	0.723952	-0.152241	1	-0.00976805	1	0.00945738	1	0.15193	1	0.142473	-0.292619	FALSE	0	0	TRUE	HYPER	0	FALSE	0	0	FALSE	HYPO	0
									TMEM125	0.242279	-0.195928	1.34689e-05	-0.271754	5.45824e-05	-0.27807	0.875324	-0.174914	1	-0.075826	1	-0.0821423	1	0.0210146	1	-0.00631627	1	0.0968406	1	0.103157	-0.292302	FALSE	HYPO	0	TRUE	HYPER	HYPER	FALSE	0	0	FALSE	0	0
									ORAI1	0.645169	0.245497	5.68106e-07	0.522304	0.000572047	0.401161	1	0.179774	0.258258	0.276807	0.898272	0.155664	1	-0.0657235	1	-0.121142	1	-0.34253	1	-0.221388	-0.292263	FALSE	0	0	TRUE	HYPO	HYPO	FALSE	0	0	FALSE	HYPER	0
									CHAF1B	0.933612	0.188063	0.0102568	0.263469	0.695065	0.1113	1	0.0359306	1	0.0754059	1	-0.0767629	1	-0.152133	1	-0.152169	1	-0.227539	1	-0.0753697	-0.292084	FALSE	0	0	TRUE	HYPO	HYPO	FALSE	0	0	TRUE	HYPER	0
									CNPY4	1	0.0569844	0.012458	0.243585	0.973166	0.0561576	1	0.103192	0.576603	0.186601	1	-0.000826787	1	0.0462072	0.594358	-0.187428	1	-0.140394	1	0.047034	-0.291824	FALSE	0	0	TRUE	HYPO	0	FALSE	0	0	TRUE	HYPER	HYPER
									NINJ1	0.601325	-0.218255	0.000484866	-0.319707	0.153902	-0.182802	0.773965	-0.274494	1	-0.101452	1	0.0354529	1	-0.0562389	1	0.136905	1	0.0452134	1	-0.0916918	-0.291417	FALSE	0	0	TRUE	HYPER	HYPER	FALSE	0	0	TRUE	HYPO	0
									ASPH	0.755676	-0.181866	0.00501728	-0.242972	0.0154821	-0.237191	1	-0.158627	1	-0.0611066	1	-0.0553257	1	0.0232388	1	0.0057809	1	0.0843455	1	0.0785646	-0.291365	FALSE	0	0	TRUE	HYPER	HYPER	FALSE	0	0	FALSE	HYPO	0
									CXADR	1	-0.120811	0.592185	0.0955698	0.0733229	0.18778	1	0.0990389	0.249982	0.216381	0.0294691	0.308591	1	0.21985	1	0.0922098	1	0.00346905	1	-0.0887407	-0.290592	TRUE	HYPER	HYPO	FALSE	0	0	TRUE	HYPO	HYPO	FALSE	0	0
									CMYA5	1	-0.0411714	0.000124444	-0.29019	0.00356891	-0.250686	0.398288	-0.290088	0.096539	-0.249018	0.181282	-0.209515	1	-0.248916	1	0.0395038	1	0.00010203	1	-0.0394018	-0.290544	FALSE	0	0	TRUE	HYPER	0	FALSE	0	0	FALSE	HYPO	0
									IER5L	1	-0.0187274	0.406992	-0.0979938	0.0460417	-0.173477	0.657865	-0.232258	1	-0.0792664	0.425641	-0.15475	1	-0.21353	1	-0.0754831	1	-0.134264	1	-0.0587809	-0.290428	TRUE	0	0	TRUE	HYPER	HYPER	FALSE	0	0	FALSE	0	0
									LCN2	1	-0.0243719	0.0721128	0.120507	0.131056	0.11928	1	0.0386858	0.304226	0.144879	0.282136	0.143652	1	0.0630577	1	-0.00122676	1	-0.081821	1	-0.0805943	-0.290357	FALSE	0	0	FALSE	0	0	FALSE	HYPO	0	FALSE	HYPER	0
									SEMA6A	0.172763	0.300156	0.000815864	0.307001	2.47016e-05	0.417686	0.593653	0.308574	1	0.00684476	1	0.117529	1	0.00841722	1	0.110685	1	0.00157246	1	-0.109112	-0.289931	FALSE	HYPER	0	TRUE	HYPO	HYPO	FALSE	0	0	FALSE	0	0
									MAFB	0.847693	-0.319292	0.349623	0.22897	5.20799e-05	0.68611	1	0.161117	0.0628978	0.548262	0.000101015	1.0054	1	0.480409	0.123433	0.45714	1	-0.0678537	0.565564	-0.524994	-0.289894	TRUE	HYPER	HYPER	FALSE	0	0	FALSE	HYPO	0	FALSE	0	0
									ZMYND8	0.55945	-0.236913	0.000152642	-0.364383	0.00115779	-0.349726	1	-0.120855	1	-0.127471	1	-0.112813	1	0.116058	1	0.0146575	1	0.243528	1	0.228871	-0.289868	FALSE	0	0	TRUE	HYPER	HYPER	FALSE	0	0	FALSE	HYPO	0
									PROM2	0.262716	-0.29045	0.000142858	-0.362397	0.00115373	-0.346596	1	-0.127492	1	-0.0719464	1	-0.056146	1	0.162958	1	0.0158005	1	0.234904	1	0.219104	-0.289824	FALSE	0	0	TRUE	HYPER	0	FALSE	0	0	FALSE	HYPO	0
									ELOVL5	1	-0.0820346	0.00394903	-0.168989	0.556378	-0.0752062	0.846515	-0.16149	0.915812	-0.0869547	1	0.00682849	1	-0.0794555	1	0.0937832	1	0.00749925	1	-0.086284	-0.289746	FALSE	0	0	TRUE	HYPER	0	FALSE	0	0	TRUE	HYPO	0
									EXO1	1	-0.0762276	0.920257	0.0428677	0.166482	-0.119222	1	-0.0301539	0.610598	0.119095	1	-0.0429944	1	0.0460737	0.16946	-0.16209	1	-0.0730216	1	0.0890681	-0.289336	FALSE	HYPO	0	FALSE	0	0	FALSE	0	0	FALSE	HYPER	0
									PSTPIP2	1	-0.0902128	0.362427	-0.0856348	0.772876	0.0605857	1	-0.112524	1	0.00457798	0.254503	0.150798	1	-0.0223114	0.248771	0.146221	1	-0.0268894	0.763173	-0.17311	-0.289194	FALSE	HYPER	0	FALSE	0	0	FALSE	0	0	FALSE	0	0
									ZFP36L1	1	-0.194624	1	-0.0621046	0.167779	0.302516	1	-0.0190716	1	0.132519	0.0782982	0.49714	1	0.175552	0.30439	0.36462	1	0.043033	1	-0.321587	-0.289138	FALSE	HYPER	0	FALSE	0	0	FALSE	HYPO	0	FALSE	0	0
									SGPP2	0.136954	0.374376	7.87773e-06	0.479477	0.000191714	0.444075	0.989637	0.274882	1	0.105101	1	0.069699	1	-0.0994943	1	-0.0354022	1	-0.204595	1	-0.169193	-0.28913	FALSE	0	0	TRUE	HYPO	HYPO	FALSE	0	0	FALSE	HYPER	0
x									TRIM29	0.414845	0.315592	0.0128905	0.31027	0.00744899	0.363511	0.223712	0.520962	1	-0.0053216	1	0.0479194	1	0.20537	1	0.053241	1	0.210692	1	0.157451	-0.288892	FALSE	0	0	TRUE	HYPO	HYPO	FALSE	0	0	FALSE	0	0
									RSPO3	0.511719	0.348208	3.508e-07	0.69625	1.97817e-06	0.711137	0.805234	0.404585	0.301164	0.348042	0.225486	0.362929	1	0.0563772	1	0.0148868	1	-0.291665	1	-0.306552	-0.288821	FALSE	HYPER	0	TRUE	HYPO	0	FALSE	0	0	FALSE	0	0
									DHCR7	1	0.0581586	0.798671	-0.100139	0.02511	-0.293831	1	0.0476347	0.964896	-0.158297	0.0821962	-0.35199	1	-0.0105239	0.879184	-0.193692	1	0.147774	0.679009	0.341466	-0.288438	TRUE	HYPO	HYPO	TRUE	0	0	FALSE	HYPER	0	FALSE	0	0
									ARNTL2	1	0.0292405	0.211455	0.163475	4.86657e-07	0.52671	1	0.205036	0.99042	0.134235	0.00177108	0.49747	1	0.175796	0.0161921	0.363235	1	0.0415611	0.578288	-0.321674	-0.287885	TRUE	HYPER	HYPER	FALSE	HYPO	0	FALSE	0	0	FALSE	0	0
									ZDHHC18	0.0167405	0.304638	5.24218e-09	0.394199	0.000699762	0.252322	1	0.163571	1	0.0895616	1	-0.0523156	1	-0.141067	0.513752	-0.141877	1	-0.230628	1	-0.0887509	-0.28778	FALSE	0	0	TRUE	HYPO	0	FALSE	0	0	FALSE	HYPER	0
									WRNIP1	0.0375491	0.356533	2.37566e-07	0.438292	0.0336468	0.220713	0.504221	0.305621	1	0.0817593	0.827363	-0.135819	1	-0.0509121	0.220725	-0.217579	1	-0.132671	1	0.0849072	-0.287634	FALSE	0	0	TRUE	HYPO	0	FALSE	0	0	FALSE	HYPER	0
									RHBG	0.932027	-0.174576	0.0262988	-0.218244	0.0126688	-0.262768	0.983578	-0.230694	1	-0.0436679	1	-0.0881927	1	-0.0561179	1	-0.0445248	1	-0.01245	1	0.0320748	-0.287171	FALSE	HYPO	0	TRUE	HYPER	0	FALSE	0	0	FALSE	0	0
									SPRED2	0.289243	-0.211379	0.0114911	-0.190206	0.0877376	-0.159274	1	-0.106054	1	0.021173	1	0.0521049	1	0.105325	1	0.0309319	1	0.0841517	1	0.0532198	-0.287043	FALSE	0	0	TRUE	HYPER	HYPER	FALSE	HYPO	0	TRUE	0	0
									ADPRH	0.353119	0.27622	2.60364e-05	0.409832	0.000361084	0.38712	1	0.183739	1	0.133612	1	0.1109	1	-0.0924807	1	-0.0227112	1	-0.226092	1	-0.203381	-0.286546	FALSE	0	0	TRUE	HYPO	0	FALSE	0	0	FALSE	HYPER	0
									POLR3C	0.779056	0.216871	0.00671432	0.285788	0.752108	0.10736	1	0.229913	1	0.0689166	1	-0.109512	1	0.0130415	0.879184	-0.178428	1	-0.0558751	1	0.122553	-0.286541	FALSE	0	0	TRUE	HYPO	HYPO	FALSE	0	0	TRUE	HYPER	0
									TMEM47	0.222122	0.28651	0.00606241	0.25945	0.000393265	0.354955	1	0.125694	1	-0.0270602	1	0.0684457	1	-0.160815	1	0.0955059	1	-0.133755	0.952157	-0.229261	-0.286534	FALSE	HYPER	0	TRUE	HYPO	HYPER	FALSE	0	0	FALSE	0	0
									ZC3HAV1	0.433022	-0.333302	0.436656	-0.171169	0.0139385	-0.362705	1	-0.204239	1	0.162133	1	-0.0294028	1	0.129063	1	-0.191536	1	-0.0330703	1	0.158466	-0.286246	TRUE	HYPO	HYPO	TRUE	HYPER	0	FALSE	0	0	FALSE	0	0
									NPC1	1	0.068141	0.101607	0.133338	0.0131927	0.195347	1	0.0458926	1	0.0651971	0.633716	0.127206	1	-0.0222484	1	0.0620086	1	-0.0874455	1	-0.149454	-0.286154	TRUE	HYPER	0	TRUE	HYPO	HYPO	FALSE	0	0	FALSE	0	0
									SEPW1	1	-0.0878768	0.0397313	-0.204079	0.00800838	-0.272697	1	-0.0962908	1	-0.116202	0.508056	-0.18482	1	-0.00841409	1	-0.0686181	1	0.107788	1	0.176406	-0.286089	FALSE	HYPO	0	TRUE	HYPER	HYPER	FALSE	0	0	FALSE	0	0
									TMEM31	1	0.00423013	0.00144375	0.251498	0.00822426	0.236314	1	0.0594446	0.110179	0.247268	0.121818	0.232084	1	0.0552145	1	-0.0151838	1	-0.192053	1	-0.17687	-0.285798	FALSE	0	0	TRUE	HYPO	0	FALSE	0	0	FALSE	HYPER	0
									HECW2	0.151929	0.216255	0.00990203	0.17266	0.594843	0.0811946	1	0.150925	1	-0.0435956	0.477736	-0.135061	1	-0.0653301	1	-0.0914651	1	-0.0217345	1	0.0697306	-0.285585	FALSE	0	0	TRUE	HYPO	0	FALSE	HYPER	0	TRUE	0	0
									TCAP	0.00622168	-0.738649	0.520051	-0.188877	0.51599	-0.207374	1	-0.228689	0.0486052	0.549772	0.0461508	0.531275	1	0.50996	1	-0.0184967	1	-0.0398113	1	-0.0213146	-0.285369	FALSE	0	0	FALSE	HYPER	0	TRUE	HYPO	HYPO	FALSE	0	0
									ORMDL3	0.439162	-0.240743	0.00769499	-0.2549	0.107671	-0.196784	0.980605	-0.234287	1	-0.0141576	1	0.0439583	1	0.00645561	1	0.0581159	1	0.0206132	1	-0.0375027	-0.285291	FALSE	0	0	TRUE	HYPER	HYPER	FALSE	0	0	TRUE	HYPO	0
									HAGHL	0.973441	0.139623	0.72984	-0.0748762	0.191243	-0.142352	1	-0.0170461	0.180228	-0.214499	0.0293095	-0.281975	1	-0.156669	1	-0.067476	1	0.0578302	1	0.125306	-0.285225	TRUE	HYPO	HYPER	FALSE	0	0	TRUE	HYPER	HYPER	FALSE	0	0
									RCHY1	1	0.0712084	0.0103728	0.583921	0.0127594	0.628829	0.958228	0.563813	0.373454	0.512713	0.249614	0.55762	1	0.492604	1	0.0449072	1	-0.0201086	1	-0.0650158	-0.285093	FALSE	HYPER	0	TRUE	HYPO	0	FALSE	0	0	FALSE	0	0
									PTTG1IP	1	-0.161914	0.846972	0.0869398	0.0107568	0.306265	1	0.0477033	0.356477	0.248854	0.0072539	0.468179	1	0.209617	0.513752	0.219325	1	-0.0392365	0.966196	-0.258562	-0.284958	TRUE	HYPER	HYPER	FALSE	0	0	FALSE	HYPO	0	FALSE	0	0
									C9orf150	1	-0.0464166	0.0287004	-0.17232	0.0413172	-0.181211	1	0.0151351	0.772152	-0.125904	0.645958	-0.134795	1	0.0615517	1	-0.00889085	1	0.187456	0.8572	0.196346	-0.284953	FALSE	HYPO	0	TRUE	0	0	FALSE	0	0	FALSE	0	0
									SLC25A37	1	0.111559	0.0161557	0.251547	0.00856228	0.298113	1	0.134837	0.974136	0.139987	0.625682	0.186553	1	0.0232778	1	0.0465659	1	-0.11671	1	-0.163276	-0.284879	FALSE	HYPER	0	TRUE	HYPO	HYPO	FALSE	0	0	FALSE	0	0
									ATG16L1	0.345941	-0.161285	2.25858e-05	-0.24019	0.00148078	-0.203712	0.69682	-0.181789	0.999247	-0.0789056	1	-0.0424274	1	-0.0205042	1	0.0364782	1	0.0584014	1	0.0219232	-0.284723	FALSE	0	0	TRUE	HYPER	HYPO	FALSE	0	0	FALSE	HYPO	0
									AACS	1	0.0510062	0.0179826	0.278285	0.227089	0.201782	1	0.260023	0.548161	0.227278	0.962985	0.150775	1	0.209017	1	-0.0765029	1	-0.0182617	1	0.0582412	-0.28471	FALSE	0	0	TRUE	HYPO	HYPO	FALSE	0	0	TRUE	HYPER	0
									C1orf80	1	0.0055866	0.00756441	-0.185148	0.00129689	-0.238249	1	-0.0192971	0.181283	-0.190734	0.0356958	-0.243836	1	-0.0248837	1	-0.0531016	1	0.165851	0.5981	0.218952	-0.284453	FALSE	HYPO	0	FALSE	HYPER	0	FALSE	0	0	FALSE	0	0
									DDX31	1	0.0738066	0.037153	-0.299768	0.0196792	-0.358811	1	-0.144325	0.181283	-0.373575	0.0662243	-0.432618	1	-0.218132	1	-0.0590428	1	0.155443	1	0.214486	-0.284108	FALSE	HYPO	0	TRUE	0	0	FALSE	HYPER	0	FALSE	0	0
									MAP4K4	0.0375491	0.37241	2.49775e-11	0.766973	3.56903e-10	0.621546	0.196675	0.406596	0.00984979	0.394563	0.170534	0.249137	1	0.0341869	1	-0.145426	1	-0.360376	1	-0.21495	-0.284059	FALSE	0	0	FALSE	HYPO	0	FALSE	0	0	FALSE	HYPER	0
									TANK	1	0.135619	1.11425e-05	0.388186	5.3397e-05	0.394131	1	0.160908	0.194578	0.252567	0.14608	0.258511	1	0.0252888	1	0.0059444	1	-0.227278	0.926513	-0.233223	-0.284008	FALSE	HYPER	0	TRUE	HYPO	0	FALSE	0	0	FALSE	0	0
									UCK1	1	-0.0420752	0.0376662	-0.125509	0.00345678	-0.180421	1	-0.00661344	0.916141	-0.083434	0.263701	-0.138346	1	0.0354617	1	-0.0549118	1	0.118896	0.641569	0.173808	-0.283973	FALSE	HYPO	0	TRUE	HYPER	0	FALSE	0	0	FALSE	0	0
									FAM5C	1	0.0865644	0.15304	0.32432	1.60455e-05	0.835181	1	-0.161509	1	0.237756	0.0127706	0.748617	1	-0.248074	0.133241	0.510861	1	-0.485829	0.221933	-0.99669	-0.283835	TRUE	HYPER	HYPER	FALSE	0	0	FALSE	0	0	FALSE	0	0
									DENND3	1	0.137536	0.00299781	0.301793	0.398136	0.152586	1	0.0582442	0.826772	0.164258	1	0.0150503	1	-0.0792916	1	-0.149207	1	-0.243549	1	-0.0943419	-0.283701	FALSE	0	0	TRUE	HYPO	HYPO	FALSE	0	0	TRUE	HYPER	0
									APBA1	0.211442	0.231288	0.0180747	0.183183	0.470382	0.104569	1	0.071122	1	-0.0481057	0.724133	-0.126719	1	-0.160166	1	-0.0786136	1	-0.112061	1	-0.0334471	-0.283656	FALSE	0	0	TRUE	HYPO	HYPER	FALSE	HYPER	0	TRUE	0	0
									PSKH2	0.560261	0.243823	0.0117488	0.263948	0.843425	0.0910833	1	0.130163	1	0.0201255	0.858518	-0.152739	1	-0.11366	0.902356	-0.172865	1	-0.133786	1	0.0390793	-0.283424	FALSE	0	0	TRUE	HYPO	HYPO	FALSE	0	0	TRUE	HYPER	0
									PPP1R2	0.618083	0.209302	0.0287062	0.210736	0.000337436	0.348937	1	0.129969	1	0.00143464	0.830228	0.139635	1	-0.0793328	1	0.138201	1	-0.0807674	0.97362	-0.218968	-0.283357	FALSE	HYPER	0	TRUE	HYPO	0	FALSE	0	0	FALSE	0	0
									SH3BGR	1	-0.0963592	0.0223137	-0.234737	0.000205503	-0.388542	1	-0.141235	0.957497	-0.138378	0.106106	-0.292183	1	-0.0448755	1	-0.153805	1	0.0935027	0.932591	0.247308	-0.283182	FALSE	HYPO	0	TRUE	HYPER	HYPER	FALSE	0	0	FALSE	0	0
				X					IL1B	1	0.0737415	1.05033e-06	0.392403	0.000110793	0.343908	1	0.0696546	0.0298514	0.318661	0.0668969	0.270167	1	-0.0040869	1	-0.0484945	1	-0.322748	0.565564	-0.274253	-0.283099	FALSE	0	0	FALSE	HYPO	0	FALSE	0	0	FALSE	HYPER	0
									EXOC8	0.134241	0.357485	4.21063e-05	0.419026	0.0303698	0.269877	0.433034	0.387378	1	0.0615416	1	-0.087608	1	0.0298928	1	-0.14915	1	-0.0316488	1	0.117501	-0.28294	FALSE	0	0	TRUE	HYPO	HYPO	FALSE	0	0	FALSE	HYPER	0
									DUSP28	1	-0.0969685	0.165153	-0.150217	0.0225058	-0.227226	0.553099	-0.29147	1	-0.0532486	0.846197	-0.130257	1	-0.194502	1	-0.0770086	1	-0.141253	1	-0.0642446	-0.282763	TRUE	0	0	TRUE	HYPER	0	FALSE	0	0	FALSE	0	0
									POLS	1	0.0373902	0.00015265	0.57563	0.754845	0.161161	0.812573	0.443902	0.0628978	0.53824	1	0.123771	1	0.406512	0.154703	-0.414469	1	-0.131728	1	0.282741	-0.282543	FALSE	0	0	TRUE	HYPO	0	FALSE	0	0	TRUE	HYPER	HYPER
									PLA2G6	0.281299	-0.199657	0.00045184	-0.235728	0.000884854	-0.247151	1	-0.0938963	1	-0.0360707	1	-0.0474941	1	0.105761	1	-0.0114234	1	0.141831	1	0.153255	-0.282044	FALSE	HYPO	0	TRUE	HYPER	HYPO	FALSE	0	0	FALSE	0	0
									SERPINA1	1	-0.105505	0.457151	0.103563	0.0821935	0.175413	1	0.0836066	0.235448	0.209067	0.0393559	0.280918	1	0.189111	1	0.0718506	1	-0.0199562	1	-0.0918068	-0.28203	TRUE	HYPER	0	FALSE	0	0	TRUE	HYPO	HYPO	FALSE	0	0
									CYB561	0.296341	-0.19184	7.59772e-05	-0.256823	0.00173858	-0.229387	0.905582	-0.176616	1	-0.0649828	1	-0.0375462	1	0.0152249	1	0.0274367	1	0.0802077	1	0.052771	-0.281731	FALSE	0	0	TRUE	HYPER	HYPER	FALSE	0	0	FALSE	HYPO	0
									BLCAP	0.297811	-0.144388	0.00156724	-0.158653	0.0173606	-0.138012	0.734715	-0.152334	1	-0.0142656	1	0.00637542	1	-0.00794646	1	0.020641	1	0.00631914	1	-0.0143219	-0.281685	FALSE	0	0	TRUE	HYPER	0	FALSE	0	0	FALSE	HYPO	0
									UGDH	0.392595	-0.273055	0.000119144	-0.385359	4.4926e-06	-0.501145	0.84062	-0.287017	1	-0.112305	0.390735	-0.22809	1	-0.0139621	1	-0.115786	1	0.0983425	1	0.214128	-0.281676	FALSE	HYPO	0	TRUE	HYPER	0	FALSE	0	0	FALSE	0	0
									PTCH1	1	-0.0319174	0.00414707	0.224712	0.0090244	0.228716	1	0.06154	0.0801992	0.25663	0.0547706	0.260633	1	0.0934574	1	0.00400342	1	-0.163172	1	-0.167176	-0.281562	FALSE	0	0	TRUE	0	0	FALSE	HYPO	0	FALSE	HYPER	0
									FLJ10769	1	-0.149167	3.67682e-05	-0.423963	0.00102398	-0.379343	0.945537	-0.272083	0.249968	-0.274796	0.417978	-0.230177	1	-0.122917	1	0.0446194	1	0.151879	1	0.10726	-0.281237	FALSE	0	0	TRUE	HYPER	HYPER	FALSE	0	0	FALSE	HYPO	0
									BRD9	0.0332585	0.404274	0.0065864	0.270209	0.808118	0.0931794	0.977825	0.245418	0.981934	-0.134065	0.0759273	-0.311095	1	-0.158857	0.782194	-0.17703	1	-0.0247915	1	0.152238	-0.281224	FALSE	0	0	TRUE	HYPO	0	FALSE	HYPER	0	FALSE	0	0
									ST8SIA4	1	0.160936	0.00453419	0.317996	0.00062091	0.410062	1	0.115686	0.95837	0.15706	0.373046	0.249126	1	-0.0452496	1	0.0920656	1	-0.20231	0.8572	-0.294375	-0.280957	FALSE	HYPER	0	TRUE	HYPO	0	FALSE	0	0	FALSE	0	0
									TMEM150	1	-0.0601522	0.0360082	-0.163674	0.0170108	-0.198514	1	-0.161738	0.950841	-0.103522	0.582824	-0.138362	1	-0.101586	1	-0.0348402	1	0.00193594	1	0.0367762	-0.280807	FALSE	HYPO	0	TRUE	HYPER	HYPER	FALSE	0	0	FALSE	0	0
									WBSCR18	1	0.0462336	0.770319	-0.0913426	0.0089386	-0.289701	1	-0.118051	0.968774	-0.137576	0.0486952	-0.335934	1	-0.164285	0.559873	-0.198358	1	-0.0267084	1	0.17165	-0.280776	TRUE	HYPO	HYPO	FALSE	0	0	FALSE	HYPER	0	FALSE	0	0
									C20orf24	1	0.0236288	7.73066e-05	0.346573	0.0048064	0.283728	1	0.13485	0.0486052	0.322944	0.133469	0.260099	1	0.111221	1	-0.0628444	1	-0.211723	1	-0.148878	-0.280689	FALSE	0	0	FALSE	HYPO	0	FALSE	0	0	FALSE	HYPER	0
									DOK1	0.327908	-0.213823	5.71925e-05	-0.298969	0.0060329	-0.235433	1	-0.156012	1	-0.0851461	1	-0.0216103	1	0.0578107	1	0.0635357	1	0.142957	1	0.0794211	-0.280675	FALSE	0	0	TRUE	HYPER	0	FALSE	0	0	FALSE	HYPO	0
									BANK1	1	0.00879381	0.0215471	0.111779	0.0463036	0.111485	1	0.0185028	0.418999	0.102985	0.388258	0.102692	1	0.00970897	1	-0.000293476	1	-0.0932761	1	-0.0929826	-0.280308	FALSE	0	0	TRUE	HYPO	0	FALSE	0	0	FALSE	HYPER	0
									FAM55C	0.49288	-0.177142	0.0046191	-0.203717	0.0171689	-0.194877	1	-0.130827	1	-0.0265753	1	-0.0177348	1	0.0463151	1	0.00884052	1	0.0728904	1	0.0640499	-0.280117	FALSE	0	0	TRUE	HYPER	HYPER	FALSE	0	0	FALSE	HYPO	0
									TMEM158	0.758285	0.200378	2.14912e-08	0.515476	4.31121e-07	0.505958	1	0.182794	0.0754709	0.315098	0.0676745	0.30558	1	-0.0175844	1	-0.00951781	1	-0.332682	0.536103	-0.323165	-0.279743	FALSE	0	0	TRUE	HYPO	0	FALSE	0	0	FALSE	HYPER	0
									SDC4	1	-0.0320026	0.464511	-0.138657	0.0253334	-0.280381	1	0.152221	1	-0.106654	0.340258	-0.248378	1	0.184224	1	-0.141724	1	0.290878	0.388088	0.432602	-0.279661	TRUE	HYPO	HYPO	TRUE	0	0	FALSE	0	0	FALSE	0	0
									CAB39L	1	0.114775	0.368986	-0.100594	0.441068	-0.103117	1	0.0482589	0.124437	-0.215369	0.0950114	-0.217891	1	-0.0665161	1	-0.00252243	1	0.148853	1	0.151375	-0.279084	FALSE	HYPO	0	FALSE	0	0	FALSE	HYPER	0	FALSE	0	0
							X		CCND2	0.597068	0.408329	0.0158649	0.435885	0.00114597	0.616322	1	0.124542	1	0.0275568	1	0.207994	1	-0.283787	1	0.180437	1	-0.311343	0.78961	-0.49178	-0.279045	FALSE	HYPER	0	TRUE	HYPO	0	FALSE	0	0	FALSE	0	0
									PHLPP	0.398199	0.243481	0.00128468	0.294428	0.0257747	0.240309	1	0.205211	1	0.0509469	1	-0.00317193	1	-0.0382708	1	-0.0541189	1	-0.0892178	1	-0.0350989	-0.278912	FALSE	0	0	TRUE	HYPO	0	FALSE	0	0	FALSE	HYPER	0
									LNX2	1	-0.0430668	0.00267969	-0.355567	0.00605024	-0.362733	1	-0.0961603	0.230197	-0.3125	0.178019	-0.319666	1	-0.0530934	1	-0.00716596	1	0.259406	1	0.266572	-0.278538	FALSE	0	0	TRUE	HYPER	HYPER	FALSE	0	0	FALSE	HYPO	0
									DNAJB11	1	-0.17177	0.471915	0.123016	0.365187	0.148931	1	0.195903	0.115385	0.294786	0.0558783	0.320701	1	0.367673	1	0.0259149	1	0.0728869	1	0.0469719	-0.278038	FALSE	0	0	FALSE	0	0	FALSE	HYPO	0	FALSE	0	0
									USP37	1	-0.091816	0.00267943	-0.177654	0.0757458	-0.131851	1	-0.0498584	0.937154	-0.0858378	1	-0.0400351	1	0.0419576	1	0.0458026	1	0.127795	1	0.0819927	-0.277971	FALSE	0	0	TRUE	HYPER	0	FALSE	0	0	TRUE	HYPO	HYPO
									EGR2	1	0.124809	6.66483e-07	0.43082	6.59969e-08	0.515728	1	0.117597	0.0664668	0.30601	0.00785689	0.390919	1	-0.00721168	1	0.0849088	1	-0.313222	0.347828	-0.398131	-0.277938	FALSE	HYPER	0	FALSE	HYPO	0	FALSE	0	0	FALSE	0	0
									ZNRF3	1	-0.065969	0.0140433	-0.245705	3.00419e-07	-0.526527	1	-0.183944	0.657113	-0.179736	0.00332045	-0.460558	1	-0.117975	0.123433	-0.280822	1	0.0617608	0.505641	0.342583	-0.27788	FALSE	HYPO	0	FALSE	HYPER	0	FALSE	0	0	FALSE	0	0
									BAALC	1	0.0725791	0.000714304	0.323601	0.000131088	0.396751	1	0.111192	0.249804	0.251022	0.055969	0.324172	1	0.0386132	1	0.0731507	1	-0.212408	0.729874	-0.285559	-0.277823	FALSE	HYPER	0	TRUE	HYPO	0	FALSE	0	0	FALSE	0	0
									TSPO	0.8928	-0.142967	0.0185111	0.181345	0.271768	0.125842	1	0.158804	0.00816138	0.324312	0.0323439	0.268809	1	0.301771	1	-0.0555028	1	-0.0225408	1	0.0329621	-0.277781	FALSE	0	0	FALSE	0	0	FALSE	HYPO	0	FALSE	HYPER	0
									CTNNA1	1	-0.020784	0.0828464	-0.319933	0.0226499	-0.424335	1	-0.126184	0.649397	-0.299149	0.247489	-0.403551	1	-0.1054	1	-0.104402	1	0.193749	1	0.298151	-0.277657	TRUE	HYPO	0	TRUE	HYPER	HYPER	FALSE	0	0	FALSE	0	0
									IL17RA	0.0278746	0.386068	0.00016934	0.335476	7.43224e-06	0.435228	1	0.196826	1	-0.0505929	1	0.0491599	1	-0.189242	1	0.0997528	1	-0.138649	0.887218	-0.238402	-0.277381	FALSE	HYPER	0	TRUE	HYPO	0	FALSE	0	0	FALSE	0	0
									GPR19	0.118221	0.278829	1.82022e-05	0.333354	0.000452436	0.304541	0.666927	0.257058	1	0.0545256	1	0.0257119	1	-0.0217709	1	-0.0288137	1	-0.0762965	1	-0.0474827	-0.277233	FALSE	0	0	TRUE	HYPO	0	FALSE	0	0	FALSE	HYPER	0
									SUOX	1	-0.0829422	0.00911412	-0.225561	0.0205073	-0.226591	1	-0.160695	0.781663	-0.142619	0.727099	-0.143649	1	-0.0777526	1	-0.00102953	1	0.0648666	1	0.0658962	-0.277233	FALSE	0	0	TRUE	HYPER	0	FALSE	0	0	FALSE	HYPO	0
									ARHGEF1	0.860093	0.132821	7.54232e-06	0.28935	0.000210738	0.266015	1	0.0973602	0.360062	0.156529	0.530134	0.133194	1	-0.0354608	1	-0.0233349	1	-0.19199	0.939285	-0.168655	-0.277176	FALSE	0	0	TRUE	HYPO	HYPO	FALSE	0	0	FALSE	HYPER	0
									NFKBIE	1	-0.0288238	0.870876	0.0811627	0.0211399	0.276444	1	0.0650885	1	0.109987	0.115369	0.305268	1	0.0939123	0.694981	0.195282	1	-0.0160743	1	-0.211356	-0.276891	TRUE	HYPER	HYPER	TRUE	0	0	FALSE	HYPO	0	FALSE	0	0
									TTC23	0.570685	0.419935	0.0299906	0.408085	0.00772534	0.527455	1	0.324113	1	-0.01185	1	0.107519	1	-0.0958228	1	0.119369	1	-0.0839728	1	-0.203342	-0.276833	FALSE	HYPER	0	TRUE	HYPO	HYPER	FALSE	0	0	FALSE	0	0
									FKBP1B	1	-0.000945097	0.0767894	-0.256021	0.0475326	-0.303522	0.67127	-0.399947	0.547196	-0.255076	0.302331	-0.302577	1	-0.399002	1	-0.0475009	1	-0.143926	1	-0.0964252	-0.276742	TRUE	0	0	TRUE	HYPER	0	FALSE	0	0	FALSE	0	0
									ZCCHC8	1	-0.0771662	0.0958198	0.197047	0.808722	-0.0962999	1	0.14223	0.204844	0.274213	1	-0.0191337	1	0.219396	0.123433	-0.293347	1	-0.0548166	1	0.23853	-0.276399	FALSE	HYPO	0	FALSE	0	0	FALSE	0	0	FALSE	HYPER	0
									ABI3	1	0.0574823	0.00906296	0.277332	0.000848205	0.375812	1	0.219272	0.482056	0.21985	0.0937814	0.31833	1	0.16179	1	0.0984796	1	-0.0580598	1	-0.156539	-0.276379	FALSE	HYPER	0	TRUE	HYPO	HYPO	FALSE	0	0	FALSE	0	0
									SLC24A6	1	0.0517642	0.0080254	0.217558	4.67707e-07	0.429515	1	0.064839	0.51693	0.165794	0.00381574	0.377751	1	0.0130748	0.161751	0.211957	1	-0.152719	0.347828	-0.364676	-0.275955	FALSE	HYPER	0	FALSE	HYPO	0	FALSE	0	0	FALSE	0	0
									CHST4	1	0.108951	3.61683e-10	0.612672	1.47929e-08	0.595206	0.0759694	0.512231	0.00151391	0.503721	0.00217058	0.486255	1	0.403281	1	-0.0174662	1	-0.100441	1	-0.0829745	-0.275776	FALSE	0	0	FALSE	HYPO	0	FALSE	0	0	FALSE	HYPER	0
									RFTN1	1	0.0683679	3.67682e-05	0.547156	0.000101821	0.569047	1	0.25291	0.0580583	0.478788	0.0320356	0.500679	1	0.184542	1	0.0218911	1	-0.294246	1	-0.316137	-0.27576	FALSE	HYPER	0	FALSE	HYPO	0	FALSE	0	0	FALSE	0	0
									CENPA	1	0.0338904	0.00395157	0.303325	0.0551481	0.244942	1	0.0599805	0.252193	0.269435	0.507371	0.211052	1	0.0260902	1	-0.0583834	1	-0.243345	1	-0.184961	-0.275733	FALSE	0	0	TRUE	HYPO	HYPO	FALSE	0	0	TRUE	HYPER	0
									PLCL2	1	0.117927	3.14536e-06	0.392345	8.04964e-07	0.45639	1	0.146413	0.10391	0.274418	0.0200838	0.338463	1	0.0284861	1	0.0640453	1	-0.245932	0.505641	-0.309977	-0.275519	FALSE	HYPER	0	FALSE	HYPO	0	FALSE	0	0	FALSE	0	0
									PLEKHA9	0.308461	0.27823	0.00508666	0.278242	0.0351756	0.245529	1	0.0823061	1	1.25267e-05	1	-0.0327007	1	-0.195924	1	-0.0327133	1	-0.195936	1	-0.163223	-0.275437	FALSE	0	0	TRUE	HYPO	0	FALSE	HYPER	0	FALSE	0	0
				X					CEBPG	0.678792	0.186565	0.000177273	0.305023	0.00848355	0.24752	0.670227	0.264525	0.957497	0.118459	1	0.0609548	1	0.0779606	1	-0.0575039	1	-0.0404981	1	0.0170058	-0.275306	FALSE	0	0	TRUE	HYPO	0	FALSE	0	0	FALSE	HYPER	0
									TNFSF13B	1	0.0455144	0.000184442	0.239616	0.0444966	0.159349	0.389495	0.246299	0.140316	0.194102	0.706868	0.113835	1	0.200784	1	-0.0802668	1	0.00668251	1	0.0869493	-0.275027	FALSE	0	0	TRUE	HYPO	HYPO	FALSE	0	0	FALSE	0	0
									TRIB3	0.00998467	-0.269733	0.0264991	-0.137179	0.0119128	-0.166445	0.69636	-0.180642	0.393872	0.132554	0.676778	0.103288	1	0.0890908	1	-0.0292659	1	-0.0434628	1	-0.0141969	-0.274392	FALSE	0	0	TRUE	HYPER	0	FALSE	HYPO	0	FALSE	0	0
									HK3	1	-0.0449549	0.00462174	0.222571	0.0219917	0.206691	0.894447	0.207241	0.0630038	0.267526	0.0676745	0.251646	1	0.252196	1	-0.0158798	1	-0.0153295	1	0.000550295	-0.274208	FALSE	0	0	TRUE	0	0	FALSE	HYPO	0	FALSE	HYPER	0
									MAP1LC3A	1	-0.11603	0.000526997	-0.248524	0.0017963	-0.249304	0.998108	-0.179576	0.688428	-0.132493	0.642423	-0.133273	1	-0.0635453	1	-0.000779931	1	0.0689481	1	0.069728	-0.274083	FALSE	0	0	TRUE	HYPER	HYPER	FALSE	0	0	FALSE	HYPO	0
									GPATCH4	1	0.149849	0.0578879	0.190377	0.358698	0.140581	1	-0.110673	1	0.0405274	1	-0.00926799	1	-0.260523	1	-0.0497954	1	-0.30105	0.799518	-0.251255	-0.273947	FALSE	0	0	FALSE	0	0	FALSE	0	0	FALSE	HYPER	0
									ATP5D	1	0.0371316	0.0820721	-0.130935	0.074837	-0.146393	1	-0.104735	0.257479	-0.168067	0.150872	-0.183525	1	-0.141866	1	-0.0154581	1	0.0262008	1	0.0416589	-0.27377	FALSE	HYPO	0	FALSE	0	0	FALSE	HYPER	0	FALSE	0	0
									FLJ10404	1	0.0655671	0.966856	-0.0443667	0.0115818	-0.220511	1	-0.110391	0.951236	-0.109934	0.0282629	-0.286078	1	-0.175958	0.327322	-0.176144	1	-0.0660243	1	0.11012	-0.273652	TRUE	HYPO	0	FALSE	0	0	FALSE	HYPER	0	FALSE	0	0
									TMEM95	1	-0.0111081	0.0065689	0.254327	0.0129752	0.260209	0.857058	0.252322	0.156995	0.265435	0.115369	0.271317	1	0.26343	1	0.00588192	1	-0.00200578	1	-0.0078877	-0.273517	FALSE	HYPER	0	TRUE	0	0	FALSE	HYPO	0	FALSE	0	0
									TMEM111	1	-0.0771635	0.0149593	-0.140542	0.00652235	-0.169739	1	-0.0279693	1	-0.0633784	0.753483	-0.0925759	1	0.0491942	1	-0.0291975	1	0.112573	0.928098	0.14177	-0.273452	FALSE	HYPO	0	TRUE	HYPER	0	FALSE	0	0	FALSE	0	0
									KIAA0323	0.860093	-0.254002	6.0746e-05	-0.497077	0.000717464	-0.468582	0.760356	-0.380681	0.629825	-0.243076	0.744225	-0.21458	1	-0.126679	1	0.0284952	1	0.116397	1	0.0879013	-0.273442	FALSE	0	0	TRUE	HYPER	HYPER	FALSE	0	0	FALSE	HYPO	0
									LIMCH1	1	0.0171571	0.000473637	0.340408	8.79743e-05	0.415198	1	0.15445	0.0871736	0.323251	0.015481	0.39804	1	0.137293	1	0.0747895	1	-0.185958	0.874727	-0.260748	-0.2734	FALSE	HYPER	0	FALSE	HYPO	0	FALSE	0	0	FALSE	0	0
									RER1	1	-0.0539498	0.00680248	-0.371734	0.000315095	-0.522995	0.773965	-0.394059	0.353665	-0.317784	0.0442017	-0.469045	1	-0.340109	1	-0.151261	1	-0.0223254	1	0.128935	-0.273288	FALSE	HYPO	0	FALSE	HYPER	0	FALSE	0	0	FALSE	0	0
									CSMD3	0.80075	0.226654	0.00222512	0.33525	0.213349	0.199351	1	0.176892	1	0.108596	1	-0.0273026	1	-0.0497616	1	-0.135899	1	-0.158358	1	-0.022459	-0.273176	FALSE	0	0	TRUE	HYPO	0	FALSE	0	0	TRUE	HYPER	HYPER
									EXOC2	1	-0.0991933	0.00194307	-0.280563	0.0178337	-0.247468	0.947449	-0.232161	0.560134	-0.181369	0.772128	-0.148274	1	-0.132968	1	0.0330949	1	0.0484015	1	0.0153067	-0.272113	FALSE	0	0	TRUE	HYPER	0	FALSE	0	0	FALSE	HYPO	0
									KIAA2013	0.372365	0.277509	0.0067843	0.283979	0.171673	0.197133	1	0.0836415	1	0.00646999	1	-0.0803754	1	-0.193867	1	-0.0868454	1	-0.200337	1	-0.113492	-0.271993	FALSE	0	0	TRUE	HYPO	0	FALSE	HYPER	0	TRUE	0	0
									GALNT14	0.859364	0.105016	1.00026e-07	0.273428	0.000128054	0.216481	0.788095	0.152455	0.0987663	0.168413	0.450796	0.111465	1	0.0474398	1	-0.0569478	1	-0.120973	1	-0.0640251	-0.271733	FALSE	0	0	TRUE	HYPO	HYPO	FALSE	0	0	FALSE	HYPER	0
				X		X			PRKCB1	0.690054	0.186098	0.0649722	0.174882	0.0049462	0.263081	1	0.151943	1	-0.011216	1	0.0769834	1	-0.0341549	1	0.0881993	1	-0.0229389	1	-0.111138	-0.271505	TRUE	HYPER	HYPER	TRUE	HYPO	0	FALSE	0	0	FALSE	0	0
									QSOX2	0.0077261	0.318545	1.58685e-06	0.312334	2.22216e-05	0.304731	0.262977	0.279431	1	-0.00621163	1	-0.0138145	1	-0.0391143	1	-0.00760288	1	-0.0329027	1	-0.0252998	-0.270642	FALSE	0	0	TRUE	HYPO	HYPO	FALSE	HYPER	0	FALSE	0	0
									RAB27A	0.708825	0.113314	0.00790793	0.140471	0.00865736	0.153249	1	0.103615	1	0.0271569	1	0.0399348	1	-0.00969965	1	0.0127779	1	-0.0368566	1	-0.0496345	-0.27053	FALSE	HYPER	0	TRUE	HYPO	HYPO	FALSE	0	0	FALSE	0	0
									UCHL1	1	0.0284241	0.013533	0.195002	0.0027292	0.252254	1	-0.0228415	0.441701	0.166577	0.120107	0.22383	1	-0.0512657	1	0.0572523	1	-0.217843	0.485057	-0.275095	-0.270049	FALSE	HYPER	0	TRUE	0	0	FALSE	0	0	FALSE	0	0
									UHRF1	1	0.122981	0.726352	0.128842	0.289488	-0.218898	1	0.0355316	1	0.0058609	0.207653	-0.341878	1	-0.0874492	0.153737	-0.347739	1	-0.0933101	1	0.254429	-0.270037	FALSE	HYPO	0	FALSE	0	0	FALSE	HYPER	0	FALSE	0	0
									PALM	1	0.0596946	0.0689603	-0.124656	0.0378688	-0.150019	1	-0.0554384	0.119411	-0.18435	0.0452304	-0.209714	1	-0.115133	1	-0.0253635	1	0.0692172	1	0.0945806	-0.269801	TRUE	HYPO	HYPER	FALSE	0	0	FALSE	HYPER	0	FALSE	0	0
									NTRK2	0.371061	0.283095	0.000254907	0.374941	0.00786593	0.313706	1	0.227921	1	0.0918457	1	0.0306104	1	-0.0551738	1	-0.0612353	1	-0.147019	1	-0.0857842	-0.269068	FALSE	0	0	TRUE	HYPO	HYPO	FALSE	0	0	FALSE	HYPER	0
									SLC12A2	1	-0.00292739	0.000123256	-0.364692	0.00126986	-0.343155	1	-0.111309	0.0399333	-0.361764	0.0435837	-0.340228	1	-0.108382	1	0.0215367	1	0.253383	1	0.231846	-0.26896	FALSE	0	0	FALSE	HYPER	0	FALSE	0	0	FALSE	HYPO	0
									MAPK3	1	-0.0638351	2.06905e-05	-0.243083	0.00670887	-0.179612	0.528996	-0.204183	0.122564	-0.179248	0.552412	-0.115777	1	-0.140348	1	0.0634707	1	0.0389	1	-0.0245706	-0.268661	FALSE	0	0	TRUE	HYPER	HYPER	FALSE	0	0	FALSE	HYPO	0
									TMEM46	1	0.153206	0.0104351	0.281565	0.00293817	0.351095	1	0.238245	1	0.128359	0.627002	0.197889	1	0.0850385	1	0.0695297	1	-0.0433207	1	-0.11285	-0.26864	FALSE	HYPER	0	TRUE	HYPO	0	FALSE	0	0	FALSE	0	0
									IFNAR2	0.766418	0.147086	0.000531492	0.237107	0.00366208	0.223973	1	0.0868954	1	0.0900213	1	0.0768868	1	-0.0601908	1	-0.0131344	1	-0.150212	1	-0.137078	-0.268426	FALSE	0	0	TRUE	HYPO	HYPO	FALSE	0	0	FALSE	HYPER	0
									CDC42BPB	0.792638	-0.190029	0.000248911	-0.327401	8.26432e-05	-0.384625	0.566517	-0.309056	0.913031	-0.137372	0.440277	-0.194596	1	-0.119028	1	-0.0572234	1	0.0183449	1	0.0755683	-0.268336	FALSE	HYPO	0	TRUE	HYPER	HYPER	FALSE	0	0	FALSE	0	0
									ZKSCAN2	1	0.104055	0.225432	0.138034	0.826366	-0.0781947	1	0.052581	1	0.033979	0.424577	-0.18225	1	-0.0514741	0.19263	-0.216229	1	-0.0854531	1	0.130776	-0.268314	FALSE	HYPO	0	FALSE	0	0	FALSE	0	0	FALSE	HYPER	0
									ZCCHC2	0.944214	-0.124461	0.348895	-0.0958911	0.0389311	-0.164496	1	0.0754913	1	0.0285702	1	-0.040035	1	0.199953	1	-0.0686052	1	0.171382	0.483977	0.239988	-0.267983	TRUE	HYPO	0	TRUE	0	0	FALSE	0	0	FALSE	0	0
									SCPEP1	0.32469	0.167154	0.00626671	0.166131	0.00188878	0.203416	1	0.0838227	1	-0.00102323	1	0.0362619	1	-0.0833316	1	0.0372851	1	-0.0823084	1	-0.119594	-0.267977	FALSE	HYPER	0	TRUE	HYPO	0	FALSE	0	0	FALSE	0	0
									RNF207	1	-0.118514	0.000794845	-0.287335	0.0107568	-0.250805	0.581555	-0.290125	0.596507	-0.168821	0.844419	-0.132291	1	-0.171611	1	0.0365302	1	-0.0027897	1	-0.0393199	-0.267943	FALSE	0	0	TRUE	HYPER	0	FALSE	0	0	FALSE	HYPO	0
									AFAP1L1	1	0.00934916	0.00703554	0.222805	0.05801	0.189042	1	0.0539407	0.233712	0.213456	0.390735	0.179692	1	0.0445916	1	-0.0337638	1	-0.168865	1	-0.135101	-0.26758	FALSE	0	0	TRUE	HYPO	HYPO	FALSE	0	0	TRUE	HYPER	0
									TMEM140	0.261481	-0.322433	0.00239247	-0.329958	0.0396597	-0.267466	1	-0.18809	1	-0.00752575	1	0.0549669	1	0.134342	1	0.0624926	1	0.141868	1	0.0793753	-0.267547	FALSE	0	0	TRUE	HYPER	0	FALSE	0	0	FALSE	HYPO	0
									ABCC4	1	0.124036	0.00682046	0.297202	0.118381	0.222752	1	0.0810335	0.839575	0.173166	1	0.0987154	1	-0.0430029	1	-0.0744505	1	-0.216169	1	-0.141718	-0.267288	FALSE	0	0	TRUE	HYPO	HYPO	FALSE	0	0	TRUE	HYPER	0
									RBM47	0.684438	-0.163993	0.000349177	-0.25794	0.000652463	-0.271466	1	-0.0176666	1	-0.0939471	0.887172	-0.107473	1	0.146326	1	-0.0135258	1	0.240274	0.536103	0.253799	-0.267154	FALSE	HYPO	0	TRUE	HYPER	0	FALSE	0	0	FALSE	0	0
									ZNF92	0.125617	-0.23915	0.00946614	-0.185591	0.0372807	-0.173352	0.607757	-0.229974	1	0.0535597	1	0.0657983	1	0.00917655	1	0.0122386	1	-0.0443831	1	-0.0566217	-0.266863	FALSE	0	0	TRUE	HYPER	0	FALSE	HYPO	0	FALSE	0	0
									RAB3A	1	0.0713097	0.00689947	0.175935	0.318269	0.104041	1	-0.0101513	0.8163	0.104625	1	0.0327316	1	-0.081461	1	-0.0718932	1	-0.186086	1	-0.114193	-0.26627	FALSE	0	0	TRUE	0	0	FALSE	0	0	TRUE	HYPER	0
									ZNF579	1	0.0191144	0.0155709	-0.166598	0.00181529	-0.226552	1	-0.0836002	0.184146	-0.185712	0.0290773	-0.245666	1	-0.102715	1	-0.0599536	1	0.0829978	1	0.142951	-0.266235	FALSE	HYPO	0	FALSE	0	0	FALSE	HYPER	0	FALSE	0	0
									BACE1	1	-0.131753	0.0977097	-0.145141	0.0012858	-0.262333	1	-0.124721	1	-0.0133877	0.696561	-0.13058	1	0.00703197	1	-0.117192	1	0.0204197	1	0.137612	-0.26619	TRUE	HYPO	HYPO	TRUE	HYPER	0	FALSE	0	0	FALSE	0	0
									RTN4IP1	0.608966	0.235665	0.00232436	0.308539	0.0171689	0.277523	0.894447	0.270137	1	0.0728743	1	0.0418579	1	0.0344725	1	-0.0310164	1	-0.0384018	1	-0.0073854	-0.265865	FALSE	0	0	TRUE	HYPO	HYPO	FALSE	0	0	FALSE	HYPER	0
									KCNMA1	0.849184	-0.219223	0.950771	-0.0683479	0.445909	0.157635	1	-0.177591	0.979217	0.150875	0.0464741	0.376859	1	0.0416321	0.513752	0.225983	1	-0.109243	0.668897	-0.335227	-0.265292	TRUE	HYPER	HYPER	FALSE	0	0	TRUE	HYPO	0	FALSE	0	0
									LCA5	1	0.0847886	0.00258775	-0.399457	0.0182289	-0.360018	1	-0.0677569	0.0421767	-0.484246	0.0542136	-0.444807	1	-0.152546	1	0.0394387	1	0.3317	1	0.292261	-0.265196	FALSE	0	0	FALSE	0	0	FALSE	HYPER	0	FALSE	HYPO	0
									HOXC11	1	-0.286696	0.0747026	0.357752	0.000500403	0.660562	1	0.306236	0.0421767	0.644448	0.000689288	0.947257	1	0.592931	0.879184	0.302809	1	-0.0515168	1	-0.354326	-0.265133	FALSE	HYPER	0	FALSE	0	0	FALSE	HYPO	0	FALSE	0	0
									POMGNT1	1	-0.0598769	0.00266154	-0.168013	0.00118139	-0.197215	0.731391	-0.16949	0.600444	-0.108137	0.271773	-0.137338	1	-0.109613	1	-0.0292019	1	-0.00147664	1	0.0277252	-0.265003	FALSE	HYPO	0	TRUE	HYPER	HYPER	FALSE	0	0	FALSE	0	0
									IER3	0.433022	-0.266084	0.0167225	-0.256622	0.0155656	-0.285894	0.809568	-0.294328	1	0.00946156	1	-0.0198107	1	-0.0282444	1	-0.0292722	1	-0.037706	1	-0.00843374	-0.264996	FALSE	0	0	TRUE	HYPER	0	FALSE	0	0	FALSE	0	0
									UPP1	1	-0.0653999	0.0962145	0.167774	0.228234	0.153931	1	0.0727763	0.206684	0.233174	0.235907	0.219331	1	0.138176	1	-0.0138434	1	-0.0949981	1	-0.0811548	-0.264819	FALSE	0	0	FALSE	0	0	FALSE	HYPO	0	FALSE	HYPER	0
									ZNF319	1	0.0275031	0.00139254	0.311228	4.09341e-07	0.526963	1	0.201772	0.155477	0.283725	0.0016219	0.49946	1	0.174269	0.393413	0.215735	1	-0.109455	0.557859	-0.325191	-0.264587	FALSE	HYPER	0	FALSE	HYPO	0	FALSE	0	0	FALSE	0	0
									MTAP	0.32469	0.278415	0.00990203	0.26352	0.51116	0.1348	1	0.115636	1	-0.0148957	0.89917	-0.143616	1	-0.162779	1	-0.12872	1	-0.147883	1	-0.0191634	-0.264499	FALSE	0	0	TRUE	HYPO	HYPER	FALSE	HYPER	0	TRUE	0	0
									BLNK	1	-0.0803412	0.00127639	-0.233578	0.00478357	-0.229469	1	-0.0126362	0.497396	-0.153237	0.496674	-0.149128	1	0.067705	1	0.00410919	1	0.220942	0.718256	0.216833	-0.264422	FALSE	0	0	TRUE	HYPER	0	FALSE	0	0	FALSE	HYPO	0
									IDUA	1	-0.0231187	0.0688081	-0.203404	0.0119259	-0.281933	1	0.0705712	0.68152	-0.180286	0.205582	-0.258814	1	0.0936899	1	-0.0785288	1	0.273975	0.498135	0.352504	-0.264419	TRUE	HYPO	HYPO	TRUE	0	0	FALSE	0	0	FALSE	0	0
									GAPDH	1	0.0607691	0.0117327	0.234906	0.0261963	0.235531	1	0.222448	0.611277	0.174137	0.571647	0.174762	1	0.161679	1	0.000625408	1	-0.012458	1	-0.0130834	-0.264014	FALSE	0	0	TRUE	HYPO	HYPO	FALSE	0	0	FALSE	HYPER	0
									FN1	1	0.0123375	0.0128152	0.198465	0.00109491	0.274692	1	0.00115366	0.32696	0.186128	0.0504554	0.262355	1	-0.0111838	1	0.0762272	1	-0.197311	0.505641	-0.273539	-0.263989	FALSE	HYPER	0	TRUE	HYPO	0	FALSE	0	0	FALSE	0	0
									BXDC2	1	-0.131696	0.00705147	0.409046	0.836885	0.135029	0.668882	0.473048	0.0439659	0.540742	0.667522	0.266725	1	0.604744	0.751768	-0.274017	1	0.0640024	1	0.33802	-0.263977	FALSE	0	0	FALSE	0	0	FALSE	HYPO	0	TRUE	0	0
									SMC2	1	0.0950399	0.00777735	0.238273	0.921587	0.0655132	1	0.210418	0.817959	0.143233	1	-0.0295267	1	0.115378	0.606599	-0.172759	1	-0.0278546	1	0.144905	-0.263949	FALSE	0	0	TRUE	HYPO	0	FALSE	0	0	TRUE	HYPER	0
									GOLGA3	1	-0.0238522	0.000844176	-0.230395	0.000139644	-0.285033	0.276891	-0.286356	0.140316	-0.206542	0.0273309	-0.261181	1	-0.262503	1	-0.0546383	1	-0.0559611	1	-0.00132279	-0.263245	FALSE	HYPO	0	FALSE	HYPER	0	FALSE	0	0	FALSE	0	0
									BCL11A	1	-0.184379	0.236253	0.237197	0.0551481	0.345555	1	0.0988297	0.163453	0.421576	0.0351153	0.529933	1	0.283208	1	0.108358	1	-0.138367	1	-0.246725	-0.263177	TRUE	HYPER	HYPER	FALSE	0	0	TRUE	HYPO	HYPO	FALSE	0	0
									GPR50	0.148371	-0.295158	0.000109734	-0.333649	0.00496239	-0.277661	0.528996	-0.306557	1	-0.0384906	1	0.0174974	1	-0.0113988	1	0.055988	1	0.0270917	1	-0.0288963	-0.262812	FALSE	0	0	TRUE	HYPER	HYPER	FALSE	0	0	FALSE	HYPO	0
									ADPRHL1	1	-0.115878	0.000987945	-0.298828	0.00190083	-0.312172	1	-0.113024	0.563958	-0.18295	0.432251	-0.196294	1	0.00285474	1	-0.013344	1	0.185804	1	0.199148	-0.262247	FALSE	HYPO	0	TRUE	HYPER	0	FALSE	0	0	FALSE	0	0
									CCDC107	0.602134	0.188128	0.000592859	0.271765	0.0527386	0.190132	1	0.139762	1	0.0836368	1	0.00200367	1	-0.0483655	1	-0.0816331	1	-0.132002	1	-0.0503692	-0.261816	FALSE	0	0	TRUE	HYPO	0	FALSE	0	0	TRUE	HYPER	HYPER
									DGKE	1	0.132554	0.316034	0.162256	0.187049	-0.204705	1	-0.0415169	1	0.0297017	0.0898292	-0.337259	1	-0.174071	0.0369997	-0.366961	1	-0.203772	1	0.163188	-0.261634	TRUE	HYPO	0	FALSE	0	0	FALSE	0	0	TRUE	HYPER	HYPER
									NRN1	0.0332585	0.664359	8.91389e-06	0.688124	1.70233e-07	0.893621	1	0.391557	1	0.0237646	0.907564	0.229262	1	-0.272803	1	0.205497	1	-0.296567	0.632027	-0.502065	-0.261614	FALSE	HYPER	0	TRUE	HYPO	0	FALSE	0	0	FALSE	0	0
									ADCY6	1	-0.0714561	0.00485748	-0.235362	0.125747	-0.168452	1	-0.124572	0.569739	-0.163906	1	-0.0969957	1	-0.0531163	1	0.0669101	1	0.11079	1	0.0438795	-0.261015	FALSE	0	0	TRUE	HYPER	0	FALSE	0	0	TRUE	HYPO	0
									MBNL1	0.138815	0.244415	1.92989e-05	0.299999	2.45319e-06	0.363105	0.33492	0.283247	1	0.0555839	0.773785	0.11869	1	0.0388317	1	0.0631065	1	-0.0167522	1	-0.0798587	-0.260836	FALSE	HYPER	0	TRUE	HYPO	HYPER	FALSE	0	0	FALSE	0	0
									KIAA1609	0.771138	0.158701	1.67388e-05	0.313734	0.000341522	0.290907	0.689567	0.235311	0.524872	0.155033	0.692928	0.132206	1	0.0766108	1	-0.0228269	1	-0.0784221	1	-0.0555952	-0.260541	FALSE	0	0	TRUE	HYPO	HYPO	FALSE	0	0	FALSE	HYPER	0
									C13orf27	0.00145056	0.41603	0.000560887	0.266198	0.00577377	0.241876	1	0.188501	0.622505	-0.149832	0.388258	-0.174153	1	-0.227529	1	-0.0243211	1	-0.0776965	1	-0.0533754	-0.260346	FALSE	0	0	TRUE	HYPO	HYPO	FALSE	HYPER	0	FALSE	0	0
									C21orf63	1	-0.111151	0.0140534	-0.203277	0.684837	-0.0901688	0.670679	-0.253152	1	-0.0921263	1	0.0209818	1	-0.142002	1	0.113108	1	-0.0498756	1	-0.162984	-0.259991	FALSE	0	0	TRUE	HYPER	HYPER	FALSE	0	0	TRUE	0	0
									BCAT1	0.111477	0.395452	4.48818e-06	0.501326	2.88642e-07	0.61711	0.498222	0.396154	1	0.105874	0.552197	0.221658	1	0.000702292	1	0.115785	1	-0.105171	1	-0.220956	-0.259887	FALSE	HYPER	0	TRUE	HYPO	HYPO	FALSE	0	0	FALSE	0	0
									PRELP	1	0.10461	0.000672354	0.218694	0.00107962	0.232261	1	0.0968544	0.73436	0.114084	0.55408	0.127651	1	-0.00775553	1	0.013567	1	-0.121839	1	-0.135406	-0.259862	FALSE	HYPER	0	TRUE	HYPO	HYPER	FALSE	0	0	FALSE	0	0
									USP6NL	0.00982107	0.3651	3.14649e-05	0.316334	6.84408e-05	0.333743	1	0.150624	1	-0.0487658	1	-0.0313574	1	-0.214476	1	0.0174084	1	-0.16571	1	-0.183118	-0.259774	FALSE	0	0	TRUE	HYPO	HYPER	FALSE	HYPER	0	FALSE	0	0
									TFCP2L1	1	0.0625715	0.209208	-0.196346	0.0319789	-0.299837	1	-0.0502198	0.436115	-0.258918	0.0940564	-0.362408	1	-0.112791	1	-0.103491	1	0.146126	1	0.249617	-0.259478	TRUE	HYPO	HYPO	TRUE	0	0	FALSE	HYPER	0	FALSE	0	0
									IQCK	1	0.116842	0.00540853	-0.254526	0.0348519	-0.226224	1	-0.071967	0.016031	-0.371368	0.0239265	-0.343065	1	-0.188809	1	0.0283025	1	0.182559	1	0.154256	-0.259344	FALSE	0	0	FALSE	0	0	FALSE	HYPER	0	FALSE	HYPO	0
									RPS7	0.713284	0.238553	0.00287334	0.327147	0.0363901	0.272744	1	0.209041	1	0.0885938	1	0.034191	1	-0.0295117	1	-0.0544028	1	-0.118106	1	-0.0637027	-0.259299	FALSE	0	0	TRUE	HYPO	HYPO	FALSE	0	0	FALSE	HYPER	0
x									MYLK	1	0.0841335	2.25969e-06	0.315298	3.42232e-07	0.373957	0.670227	0.218728	0.0751541	0.231164	0.0111893	0.289823	1	0.134595	1	0.0586594	1	-0.0965691	1	-0.155228	-0.258707	FALSE	HYPER	0	FALSE	HYPO	0	FALSE	0	0	FALSE	0	0
									NOTCH3	1	0.0279907	0.115625	0.115996	0.0127276	0.174733	1	-0.0563249	0.951236	0.0880056	0.307025	0.146742	1	-0.0843156	1	0.0587366	1	-0.172321	0.444203	-0.231058	-0.258688	TRUE	HYPER	0	TRUE	0	0	FALSE	0	0	FALSE	0	0
									CDH4	0.959846	0.211069	0.996347	0.0510637	0.478552	-0.159104	1	0.213506	0.967836	-0.160005	0.0668969	-0.370173	1	0.00243673	0.749909	-0.210168	1	0.162442	0.578257	0.37261	-0.258542	FALSE	HYPO	0	FALSE	0	0	FALSE	HYPER	0	FALSE	0	0
									TPCN1	0.293647	-0.35698	0.0001752	-0.453655	0.00301796	-0.406089	1	-0.270434	1	-0.0966753	1	-0.0491093	1	0.0865461	1	0.047566	1	0.183221	1	0.135655	-0.258506	FALSE	0	0	TRUE	HYPER	0	FALSE	0	0	FALSE	HYPO	0
									GNPNAT1	1	0.131835	0.249582	0.178503	0.057535	-0.262098	1	0.0522766	1	0.0466682	0.0415431	-0.393933	1	-0.0795581	0.00750403	-0.440601	1	-0.126226	0.797156	0.314375	-0.258444	TRUE	HYPO	HYPO	FALSE	0	0	FALSE	0	0	FALSE	HYPER	0
									PTPRZ1	1	0.0771257	0.0773772	0.173295	0.00128366	0.300881	1	0.107298	1	0.0961694	0.209937	0.223755	1	0.0301726	1	0.127586	1	-0.0659968	1	-0.193583	-0.258328	TRUE	HYPER	HYPER	TRUE	HYPO	HYPER	FALSE	0	0	FALSE	0	0
									PAK4	0.859364	-0.260437	0.0016193	-0.410846	0.000543126	-0.488959	1	-0.269006	1	-0.15041	0.697706	-0.228522	1	-0.00856961	1	-0.0781125	1	0.14184	1	0.219953	-0.258269	FALSE	HYPO	0	TRUE	HYPER	HYPER	FALSE	0	0	FALSE	0	0
									CHST2	0.301784	0.305779	0.158286	0.189357	0.0171417	0.293426	0.977825	0.268838	1	-0.116422	1	-0.0123531	1	-0.0369409	1	0.104069	1	0.0794812	1	-0.0245878	-0.258248	TRUE	0	0	TRUE	HYPO	HYPER	FALSE	HYPER	0	FALSE	0	0
									ZNF570	0.901821	0.157213	0.00214849	0.250273	0.00102279	0.291657	0.909345	0.214955	1	0.09306	0.764135	0.134443	1	0.0577417	1	0.0413835	1	-0.0353183	1	-0.0767018	-0.258224	FALSE	HYPER	0	TRUE	HYPO	HYPO	FALSE	0	0	FALSE	0	0
									MARCH3	1	0.0691778	0.0082234	0.241532	0.840632	0.0804761	0.817436	0.253589	0.609226	0.172354	1	0.0112983	1	0.184411	0.795356	-0.161056	1	0.0120565	1	0.173112	-0.257754	FALSE	0	0	TRUE	HYPO	HYPO	FALSE	0	0	TRUE	0	0
									WDR67	1	0.169667	0.000324433	0.364455	0.00314736	0.337686	1	0.232948	0.641698	0.194788	0.77946	0.16802	1	0.0632812	1	-0.0267685	1	-0.131507	1	-0.104739	-0.257618	FALSE	0	0	TRUE	HYPO	0	FALSE	0	0	FALSE	HYPER	0
									RCAN3	1	0.115611	0.0109444	0.171288	0.003181	0.213309	1	0.0741799	1	0.0556778	0.865207	0.0976982	1	-0.0414307	1	0.0420204	1	-0.0971085	1	-0.139129	-0.257611	FALSE	HYPER	0	TRUE	HYPO	0	FALSE	0	0	FALSE	0	0
									PAPD1	1	0.0960531	2.0961e-07	0.303854	0.00037845	0.231227	0.601129	0.199999	0.0635398	0.207801	0.378826	0.135174	1	0.103946	1	-0.0726265	1	-0.103855	1	-0.0312287	-0.257607	FALSE	0	0	TRUE	HYPO	HYPO	FALSE	0	0	FALSE	HYPER	0
									DMN	0.0881607	0.297358	0.00048517	0.276401	1.87936e-07	0.447003	1	0.194774	1	-0.0209576	0.62461	0.149644	1	-0.102585	0.469162	0.170602	1	-0.0816272	0.632027	-0.252229	-0.256676	FALSE	HYPER	0	TRUE	HYPO	HYPER	FALSE	0	0	FALSE	0	0
									SMYD2	1	0.0822462	0.00452227	0.172523	0.0248464	0.157441	1	-0.0622426	0.913031	0.0902771	1	0.075195	1	-0.144489	1	-0.015082	1	-0.234766	0.465471	-0.219684	-0.256663	FALSE	0	0	TRUE	0	0	FALSE	0	0	FALSE	HYPER	0
									C2CD2	0.244527	-0.210753	0.17367	-0.120956	0.445176	-0.100591	0.118813	-0.341318	1	0.0897973	0.809776	0.110162	1	-0.130565	1	0.0203651	1	-0.220362	0.536103	-0.240727	-0.256624	FALSE	0	0	FALSE	HYPER	0	FALSE	0	0	FALSE	0	0
									C20orf75	1	0.0831558	0.00210833	0.24132	1.58952e-06	0.399537	0.564467	0.266121	0.54925	0.158164	0.0150846	0.316381	1	0.182965	0.563085	0.158217	1	0.0248011	1	-0.133416	-0.256494	FALSE	HYPER	0	FALSE	HYPO	0	FALSE	0	0	FALSE	0	0
									C5orf37	1	-0.107447	2.48442e-05	-0.253873	9.98266e-07	-0.323344	0.773965	-0.183514	0.355681	-0.146426	0.0453249	-0.215897	1	-0.0760666	1	-0.0694707	1	0.0703594	1	0.13983	-0.256405	FALSE	HYPO	0	FALSE	HYPER	0	FALSE	0	0	FALSE	0	0
									ABCB8	0.944214	-0.239135	4.93023e-05	-0.503189	0.000143434	-0.520811	1	-0.237206	0.51693	-0.264054	0.398686	-0.281675	1	0.00192902	1	-0.0176214	1	0.265983	1	0.283604	-0.256268	FALSE	HYPO	0	TRUE	HYPER	0	FALSE	0	0	FALSE	0	0
x									EPHX1	0.470656	-0.200165	0.00579305	-0.222585	0.843425	-0.0710609	0.849902	-0.219936	1	-0.0224201	0.777057	0.129104	1	-0.0197711	0.665162	0.151524	1	0.00264896	1	-0.148875	-0.256187	FALSE	0	0	TRUE	HYPER	HYPER	FALSE	0	0	TRUE	HYPO	0
									TMEM26	1	-0.12187	7.88812e-06	-0.537913	0.00118428	-0.440362	0.68859	-0.389923	0.075795	-0.416043	0.23217	-0.318492	1	-0.268053	1	0.0975509	1	0.14799	1	0.0504391	-0.256126	FALSE	0	0	TRUE	HYPER	0	FALSE	0	0	FALSE	HYPO	0
									FAM105B	1	0.0896258	0.0097501	0.241065	0.00435621	0.28797	1	0.117509	0.797668	0.151439	0.410445	0.198344	1	0.0278834	1	0.0469049	1	-0.123556	1	-0.170461	-0.256062	FALSE	HYPER	0	TRUE	HYPO	0	FALSE	0	0	FALSE	0	0
				X					TAL2	0.251771	-0.247051	0.000278368	-0.292711	1.47846e-05	-0.379376	1	-0.135885	1	-0.0456597	0.790888	-0.132325	1	0.111167	1	-0.0866652	1	0.156826	0.723976	0.243491	-0.255701	FALSE	HYPO	0	TRUE	HYPER	HYPO	FALSE	0	0	FALSE	0	0
									MKNK2	1	-0.157435	0.0016362	-0.302006	0.307936	-0.158297	1	-0.0896512	0.913031	-0.144571	1	-0.000861985	1	0.0677841	1	0.143709	1	0.212355	1	0.0686461	-0.255682	FALSE	0	0	TRUE	HYPER	0	FALSE	0	0	TRUE	HYPO	HYPO
									ABTB2	1	0.026005	0.0405584	0.17473	0.0642873	0.179924	1	0.17932	0.632311	0.148725	0.550597	0.153919	1	0.153315	1	0.00519373	1	0.00459019	1	-0.000603537	-0.25568	FALSE	0	0	TRUE	HYPO	0	FALSE	0	0	TRUE	HYPER	0
									PIAS3	0.828711	-0.139972	0.000618883	-0.232015	0.0048651	-0.215834	0.581555	-0.229971	1	-0.0920428	1	-0.0758617	1	-0.0899993	1	0.0161811	1	0.00204346	1	-0.0141376	-0.255512	FALSE	0	0	TRUE	HYPER	0	FALSE	0	0	FALSE	HYPO	0
									SIM1	0.0194231	0.622462	0.00109857	0.460136	0.000160662	0.575447	1	0.327487	1	-0.162326	1	-0.0470152	1	-0.294975	1	0.115311	1	-0.132649	1	-0.24796	-0.255509	FALSE	0	0	TRUE	HYPO	0	FALSE	HYPER	0	FALSE	0	0
									PNMA1	1	0.187226	0.102889	0.349338	0.775482	-0.181847	0.851277	0.502753	1	0.162112	0.501371	-0.369072	1	0.315527	0.123433	-0.531184	1	0.153415	0.441907	0.684599	-0.254933	FALSE	HYPO	0	FALSE	0	0	FALSE	0	0	FALSE	0	0
									CDC7	0.102593	0.316379	0.00819633	0.239719	0.153309	0.174064	1	0.132882	1	-0.0766607	0.792757	-0.142315	1	-0.183497	1	-0.0656542	1	-0.106836	1	-0.041182	-0.254918	FALSE	0	0	TRUE	HYPO	0	FALSE	HYPER	0	TRUE	0	0
									RPL14	1	0.116612	0.0010248	0.340626	0.03782	0.260134	1	0.181808	0.471018	0.224015	0.942758	0.143522	1	0.0651967	1	-0.0804926	1	-0.158818	1	-0.0783253	-0.254585	FALSE	0	0	TRUE	HYPO	HYPO	FALSE	0	0	FALSE	HYPER	0
									HPS4	1	-0.0370125	0.0125895	-0.2635	0.000415539	-0.389461	1	-0.0465563	0.426864	-0.226487	0.0467402	-0.352449	1	-0.00954377	1	-0.125961	1	0.216943	0.546201	0.342905	-0.254275	FALSE	HYPO	0	FALSE	HYPER	0	FALSE	0	0	FALSE	0	0
x									OGG1	1	-0.0613276	0.129777	-0.162432	0.0037827	-0.282767	1	-0.0188374	1	-0.101104	0.251148	-0.221439	1	0.0424903	1	-0.120335	1	0.143594	0.709715	0.26393	-0.254048	TRUE	HYPO	HYPO	TRUE	HYPER	0	FALSE	0	0	FALSE	0	0
									IFI30	1	-0.050591	0.407855	0.0664004	0.00914953	0.143515	1	0.00163134	0.332733	0.116991	0.0164642	0.194106	1	0.0522223	1	0.0771145	1	-0.064769	0.746991	-0.141883	-0.254033	TRUE	HYPER	0	FALSE	0	0	FALSE	HYPO	0	FALSE	0	0
									ARFIP2	1	-0.0585554	0.00341484	-0.26638	0.0378427	-0.224148	1	-0.134223	0.381786	-0.207824	0.638601	-0.165593	1	-0.0756678	1	0.0422316	1	0.132156	1	0.0899247	-0.253801	FALSE	0	0	TRUE	HYPER	0	FALSE	0	0	FALSE	HYPO	0
									ARHGAP25	1	-0.0452436	1	0.0344662	0.0950669	-0.20568	1	0.046935	1	0.0797098	0.745264	-0.160436	1	0.0921786	0.213005	-0.240146	1	0.0124688	0.873319	0.252615	-0.253759	FALSE	HYPO	0	FALSE	0	0	FALSE	0	0	FALSE	0	0
									RXRA	0.969562	-0.114792	3.82697e-06	-0.278746	7.4834e-07	-0.328142	1	-0.099398	0.235958	-0.163954	0.0487988	-0.21335	1	0.0153938	1	-0.0493959	1	0.179348	0.465471	0.228744	-0.253423	FALSE	HYPO	0	FALSE	HYPER	0	FALSE	0	0	FALSE	0	0
									CAPS	1	-0.0970738	0.0107791	-0.238403	0.00212336	-0.306713	1	0.080254	0.880239	-0.141329	0.343896	-0.209639	1	0.177328	1	-0.0683102	1	0.318657	0.378318	0.386967	-0.253355	FALSE	HYPO	0	TRUE	0	0	FALSE	0	0	FALSE	0	0
									PBEF1	1	0.117314	0.00141881	0.295226	0.00211904	0.314123	1	0.0879602	0.62207	0.177912	0.449072	0.196809	1	-0.029354	1	0.0188975	1	-0.207266	0.970665	-0.226163	-0.253344	FALSE	HYPER	0	TRUE	HYPO	0	FALSE	0	0	FALSE	0	0
									GATS	1	-0.143654	0.00484334	-0.243115	5.93134e-06	-0.409624	0.979656	-0.213649	1	-0.0994605	0.0844822	-0.26597	1	-0.0699946	0.617681	-0.166509	1	0.0294659	1	0.195975	-0.25325	FALSE	HYPO	0	TRUE	HYPER	HYPER	FALSE	0	0	FALSE	0	0
									SNAPC1	1	0.0840857	0.00250043	0.283929	0.826712	0.0865458	1	0.0972304	0.472664	0.199844	1	0.00246014	1	0.0131447	0.481379	-0.197383	1	-0.186699	1	0.0106846	-0.25292	FALSE	0	0	TRUE	HYPO	HYPER	FALSE	0	0	TRUE	HYPER	HYPER
									GLRX5	1	-0.126604	1.14411e-06	-0.345195	3.48851e-08	-0.432401	0.54312	-0.251917	0.136097	-0.218591	0.0117171	-0.305797	1	-0.125313	1	-0.0872058	1	0.0932783	0.962076	0.180484	-0.252723	FALSE	HYPO	0	FALSE	HYPER	0	FALSE	0	0	FALSE	0	0
									GJB2	1	-0.0315836	0.101607	0.144688	0.104275	0.158508	1	0.14339	0.355681	0.176272	0.24158	0.190092	1	0.174974	1	0.0138198	1	-0.00129796	1	-0.0151177	-0.252697	FALSE	HYPER	0	FALSE	0	0	FALSE	HYPO	0	FALSE	0	0
									ELA2A	0.985029	-0.111778	0.0262148	-0.145029	0.00133399	-0.215228	0.680512	-0.193748	1	-0.0332515	0.742087	-0.10345	1	-0.0819704	1	-0.0701988	1	-0.0487189	1	0.0214798	-0.252563	FALSE	HYPO	0	TRUE	HYPER	HYPO	FALSE	0	0	FALSE	0	0
									TLX1	0.137481	0.379475	7.59228e-09	0.638019	2.32334e-11	0.858487	0.0787916	0.583397	0.383875	0.258544	0.00968707	0.479012	1	0.203922	0.617681	0.220468	1	-0.0546218	0.966196	-0.27509	-0.252462	FALSE	HYPER	0	FALSE	HYPO	0	FALSE	0	0	FALSE	0	0
									ALDH9A1	0.094269	0.273099	0.000580321	0.253789	0.000842573	0.271794	0.998108	0.184523	1	-0.01931	1	-0.0013048	1	-0.0885759	1	0.0180052	1	-0.0692659	1	-0.0872711	-0.25225	FALSE	0	0	TRUE	HYPO	0	FALSE	HYPER	0	FALSE	0	0
									MFSD1	0.0467026	0.341581	3.53493e-08	0.460695	0.00013955	0.349925	0.23461	0.365731	0.974797	0.119114	1	0.00834338	1	0.0241495	1	-0.11077	1	-0.0949642	1	0.0158062	-0.251822	FALSE	0	0	TRUE	HYPO	0	FALSE	0	0	FALSE	HYPER	0
									CHRNA5	1	-0.0475112	0.00940468	0.169756	0.000157483	0.258028	1	0.102098	0.066518	0.217267	0.00320067	0.305539	1	0.149609	1	0.0882718	1	-0.0676581	0.965982	-0.15593	-0.251515	FALSE	HYPER	0	FALSE	0	0	FALSE	HYPO	0	FALSE	0	0
									RNF150	1	0.129731	0.00314756	0.224855	0.0479712	0.181614	1	0.0862513	1	0.0951248	1	0.0518829	1	-0.0434793	1	-0.0432419	1	-0.138604	1	-0.0953622	-0.251448	FALSE	0	0	TRUE	HYPO	HYPER	FALSE	0	0	FALSE	HYPER	0
									DUT	1	0.125691	0.839317	0.0730534	0.337841	-0.140029	1	0.181807	1	-0.0526377	0.100649	-0.265721	1	0.0561157	0.248771	-0.213083	1	0.108753	0.465471	0.321836	-0.251289	FALSE	HYPO	0	FALSE	0	0	FALSE	0	0	FALSE	0	0
									MICALL2	0.0615441	-0.398803	7.99212e-10	-0.629703	1.99535e-08	-0.620083	0.329189	-0.404788	0.41473	-0.2309	0.431978	-0.22128	1	-0.0059847	1	0.00962047	1	0.224915	1	0.215295	-0.251065	FALSE	0	0	TRUE	HYPER	HYPER	FALSE	0	0	FALSE	HYPO	0
									LYPD1	0.27381	0.390542	5.17217e-05	0.521309	0.00042566	0.50491	0.666927	0.427364	1	0.130767	1	0.114367	1	0.0368221	1	-0.0163997	1	-0.093945	1	-0.0775453	-0.250863	FALSE	0	0	TRUE	HYPO	0	FALSE	0	0	FALSE	HYPER	0
									KIAA1199	1	-0.0809902	0.747565	0.079464	0.0624929	0.190802	1	0.192645	0.601636	0.160454	0.0629365	0.271792	1	0.273635	1	0.111338	1	0.113181	1	0.00184335	-0.250828	FALSE	HYPER	0	FALSE	0	0	FALSE	HYPO	0	FALSE	0	0
									NAE1	1	0.092807	0.00015199	0.229131	0.319222	0.100946	1	0.122603	0.434454	0.136324	1	0.00813886	1	0.0297963	0.513752	-0.128185	1	-0.106527	1	0.0216575	-0.250647	FALSE	0	0	TRUE	HYPO	HYPO	FALSE	0	0	TRUE	HYPER	0
									MBOAT5	1	-0.0973416	3.22255e-08	-0.317916	1.6629e-06	-0.29943	0.451116	-0.214074	0.0366182	-0.220574	0.0482227	-0.202088	1	-0.116733	1	0.0184859	1	0.103841	1	0.0853553	-0.250335	FALSE	0	0	FALSE	HYPER	0	FALSE	0	0	FALSE	HYPO	0
									MAP9	1	0.0726539	0.115168	-0.100215	0.0248368	-0.139327	0.952292	-0.135738	0.0892178	-0.172869	0.0163277	-0.211981	1	-0.208392	1	-0.0391119	1	-0.0355236	1	0.00358832	-0.249987	TRUE	HYPO	0	FALSE	0	0	FALSE	HYPER	0	FALSE	0	0
									TMEM104	1	0.151317	2.68172e-05	0.42924	0.0566688	0.247374	0.37053	0.401343	0.235151	0.277922	1	0.0960562	1	0.250026	0.881351	-0.181866	1	-0.0278967	1	0.153969	-0.2498	FALSE	0	0	TRUE	HYPO	HYPO	FALSE	0	0	TRUE	HYPER	0
									C7orf24	1	-0.125903	0.00620664	-0.221737	0.131631	-0.161161	1	0.0963767	1	-0.0958332	1	-0.0352581	1	0.22228	1	0.0605751	1	0.318113	0.594179	0.257538	-0.249638	FALSE	0	0	TRUE	0	0	FALSE	0	0	TRUE	HYPO	HYPO
									FLJ11506	1	-0.0553608	0.000801121	-0.346334	0.000123432	-0.429959	0.872016	-0.28487	0.187434	-0.290974	0.0363661	-0.374598	1	-0.229509	1	-0.0836243	1	0.0614647	1	0.145089	-0.249523	FALSE	HYPO	0	FALSE	HYPER	0	FALSE	0	0	FALSE	0	0
									HOXB7	1	-0.059866	0.0685381	0.200687	0.00568259	0.300463	1	0.122678	0.219244	0.260553	0.0290773	0.360329	1	0.182544	1	0.0997758	1	-0.0780086	1	-0.177784	-0.249464	TRUE	HYPER	0	FALSE	0	0	FALSE	HYPO	0	FALSE	0	0
									CCL5	0.475389	0.149237	2.615e-06	0.269493	7.43224e-06	0.282343	0.498222	0.208008	0.544322	0.120256	0.376783	0.133106	1	0.0587711	1	0.01285	1	-0.0614849	1	-0.0743349	-0.249446	FALSE	HYPER	0	TRUE	HYPO	HYPO	FALSE	0	0	FALSE	0	0
									CHFR	1	-0.106015	0.0214768	-0.302949	0.0502999	-0.298467	0.498222	-0.441904	0.863538	-0.196934	0.836374	-0.192453	1	-0.335889	1	0.00448116	1	-0.138955	1	-0.143437	-0.249264	FALSE	0	0	TRUE	HYPER	0	FALSE	0	0	TRUE	0	0
									SLC6A15	0.10701	0.384545	1.87771e-05	0.450119	7.79129e-05	0.459142	0.574437	0.36614	1	0.0655732	1	0.0745965	1	-0.0184049	1	0.00902335	1	-0.0839781	1	-0.0930014	-0.249214	FALSE	HYPER	0	TRUE	HYPO	HYPO	FALSE	0	0	FALSE	0	0
									ZNF486	0.0123922	-0.566349	0.00367534	-0.364472	0.117928	-0.257213	0.097176	-0.625638	0.826902	0.201877	0.262668	0.309136	1	-0.0592888	1	0.107259	1	-0.261166	0.723976	-0.368425	-0.249154	FALSE	0	0	TRUE	HYPER	HYPER	FALSE	0	0	FALSE	0	0
									KIAA0495	1	-0.119263	0.0182122	-0.23422	0.0182576	-0.258646	1	-0.100793	1	-0.114958	0.884416	-0.139384	1	0.0184696	1	-0.0244261	1	0.133427	1	0.157853	-0.24904	FALSE	HYPO	0	TRUE	HYPER	HYPER	FALSE	0	0	FALSE	0	0
									XAF1	1	0.155688	0.00498943	0.376895	0.000160251	0.535688	1	0.308837	0.796045	0.221207	0.13581	0.38	1	0.153149	1	0.158793	1	-0.0680574	1	-0.226851	-0.248496	FALSE	HYPER	0	TRUE	HYPO	0	FALSE	0	0	FALSE	0	0
									GAL3ST3	1	-0.0957028	0.0305257	-0.25176	1	0.00562749	0.958228	-0.276689	0.95037	-0.156057	1	0.10133	1	-0.180986	0.276663	0.257387	1	-0.024929	0.893396	-0.282316	-0.248403	FALSE	0	0	TRUE	HYPER	HYPER	FALSE	0	0	TRUE	0	0
									HSD17B7	1	0.0161696	6.61317e-07	-0.504299	3.45931e-07	-0.567778	1	-0.222622	0.00220804	-0.520468	0.000395461	-0.583948	1	-0.238791	1	-0.0634791	1	0.281677	0.56922	0.345156	-0.248196	FALSE	HYPO	0	FALSE	0	0	FALSE	HYPER	0	FALSE	0	0
									PECI	0.0474243	-0.292827	4.60353e-06	-0.326688	0.0100882	-0.214793	0.547344	-0.251967	1	-0.0338605	1	0.0780348	1	0.0408609	1	0.111895	1	0.0747214	1	-0.037174	-0.248143	FALSE	0	0	TRUE	HYPER	0	FALSE	0	0	FALSE	HYPO	0
									TBC1D24	1	-0.238674	0.00728075	-0.405746	0.000163584	-0.598516	1	-0.300976	1	-0.167072	0.285747	-0.359842	1	-0.0623027	1	-0.19277	1	0.10477	1	0.297539	-0.247842	FALSE	HYPO	0	TRUE	HYPER	0	FALSE	0	0	FALSE	0	0
									LRP10	0.685645	-0.214919	0.00906296	-0.258483	0.435929	-0.140689	1	-0.108515	1	-0.0435636	1	0.0742304	1	0.106404	1	0.117794	1	0.149968	1	0.0321738	-0.247836	FALSE	0	0	TRUE	HYPER	0	FALSE	0	0	TRUE	HYPO	HYPO
									KLF9	0.222703	-0.34567	0.594251	-0.128001	0.322913	0.181873	1	-0.233138	0.600444	0.217669	0.00384886	0.527543	1	0.112532	0.133241	0.309874	1	-0.105137	0.457842	-0.415011	-0.247739	TRUE	HYPER	HYPER	FALSE	0	0	TRUE	HYPO	0	FALSE	0	0
									C18orf1	0.00207965	-0.365643	5.72761e-08	-0.373358	0.000144132	-0.287732	1	-0.152034	1	-0.00771464	1	0.0779113	1	0.213609	1	0.0856259	1	0.221324	1	0.135698	-0.24748	FALSE	0	0	TRUE	HYPER	0	FALSE	HYPO	0	FALSE	0	0
									FCGRT	1	-0.0285185	0.00861429	-0.137828	3.90471e-05	-0.224615	0.678028	-0.161715	0.472664	-0.10931	0.0230664	-0.196096	1	-0.133197	0.910917	-0.0867864	1	-0.0238872	1	0.0628992	-0.247465	FALSE	HYPO	0	FALSE	HYPER	0	FALSE	0	0	FALSE	0	0
									VHL	1	0.0338451	0.0100078	0.235971	0.528926	0.118679	1	0.0351139	0.399229	0.202126	1	0.0848343	1	0.00126887	1	-0.117291	1	-0.200857	1	-0.0835654	-0.247431	FALSE	0	0	TRUE	HYPO	HYPO	FALSE	0	0	TRUE	HYPER	0
									HAPLN3	0.736421	0.217892	0.00944061	0.26955	0.000190337	0.405272	1	0.134309	1	0.051658	0.627002	0.18738	1	-0.0835829	1	0.135722	1	-0.135241	0.848166	-0.270963	-0.246987	FALSE	HYPER	0	TRUE	HYPO	HYPER	FALSE	0	0	FALSE	0	0
									CYR61	0.401978	0.271529	2.06628e-06	0.472367	1.18588e-06	0.53065	0.525999	0.356786	0.593815	0.200838	0.249351	0.259121	1	0.0852563	1	0.0582829	1	-0.115581	1	-0.173864	-0.246986	FALSE	HYPER	0	TRUE	HYPO	0	FALSE	0	0	FALSE	0	0
									FBXO17	1	0.145653	0.00513619	0.25033	0.447529	0.127009	1	0.0747438	1	0.104676	1	-0.0186441	1	-0.0709093	1	-0.123321	1	-0.175586	1	-0.0522651	-0.246961	FALSE	0	0	TRUE	HYPO	HYPO	FALSE	0	0	TRUE	HYPER	0
									TTC7A	1	-0.1485	0.25744	0.14569	0.0167047	0.254183	1	-0.0706455	0.0989879	0.29419	0.00785689	0.402683	1	0.0778549	1	0.108493	1	-0.216335	0.513859	-0.324829	-0.246887	TRUE	HYPER	HYPER	FALSE	0	0	FALSE	HYPO	0	FALSE	0	0
									TAGLN2	1	0.0399436	0.0376798	0.311557	0.0260127	0.360795	1	0.152744	0.58621	0.271613	0.339579	0.320851	1	0.1128	1	0.0492383	1	-0.158813	1	-0.208051	-0.246827	FALSE	HYPER	0	TRUE	HYPO	0	FALSE	0	0	FALSE	0	0
									FSIP1	1	0.0502789	0.00956562	-0.222835	0.000370505	-0.321448	1	-0.044847	0.0882953	-0.273114	0.00704871	-0.371727	1	-0.0951258	1	-0.0986128	1	0.177988	0.565564	0.276601	-0.246815	FALSE	HYPO	0	FALSE	0	0	FALSE	HYPER	0	FALSE	0	0
									FAM150B	0.194119	0.348582	0.0258821	0.260667	0.0188708	0.299041	1	0.0944071	1	-0.0879159	1	-0.0495414	1	-0.254175	1	0.0383745	1	-0.166259	1	-0.204634	-0.246769	FALSE	0	0	TRUE	HYPO	0	FALSE	HYPER	0	FALSE	0	0
									SLC35F2	1	-0.0752369	0.0501206	0.171674	0.134763	0.159866	1	0.0187482	0.110657	0.246911	0.113575	0.235103	1	0.0939851	1	-0.0118072	1	-0.152925	1	-0.141118	-0.246238	FALSE	0	0	FALSE	0	0	FALSE	HYPO	0	FALSE	HYPER	0
									UBE4B	1	0.0417721	0.71535	-0.1049	0.00304228	-0.343232	1	-0.0925475	0.969206	-0.146672	0.0309368	-0.385004	1	-0.13432	0.343614	-0.238332	1	0.012352	0.9983	0.250684	-0.245927	TRUE	HYPO	HYPO	FALSE	0	0	FALSE	HYPER	0	FALSE	0	0
									MAP4K1	1	0.0989173	0.0946012	0.276852	0.00405162	0.451711	1	0.0234962	1	0.177935	0.260661	0.352794	1	-0.0754211	1	0.174858	1	-0.253356	0.691177	-0.428215	-0.245917	TRUE	HYPER	HYPER	TRUE	HYPO	0	FALSE	0	0	FALSE	0	0
[truncated: 3,369 more rows]

## Sheet: Table S4D
		Table S4D: 459 genes exhibited mRNA expression deregulation in relation with DNA methylation level (correlation ≥ -0,40, genes are presented in decreasing order)
[truncated: 462 more rows]

## Sheet: Table S4E
	Table S4E: Genes exhibiting a mRNA expression deregulation in relation with DNA methylation level in the various molecular subtypes
[truncated: 171 more rows]

[truncated: 1 more sheets: Table S4F]
